# Supplementary material for: Association between tendon ruptures and use of fluoroquinolone, and other oral antibiotics: a 10-year retrospective study of 1 million US senior Medicare beneficiaries
Source: PubMed Central journal article supplement — BMJ Open. 2020 Dec 21;10(12):e034844. doi: 10.1136/bmjopen-2019-034844 (PMC7754651; doi:10.1136/bmjopen-2019-034844), 2020-12-21
Supplement: bmjopen-2019-034844.draft_revisions.pdf [file bmjopen-2019-034844.draft_revisions.pdf]

# BMJ Open

BMJ Open is committed to open peer review. As part of this commitment we make the peer review history of every article we publish publicly available.

When an article is published we post the peer reviewers' comments and the authors' responses online. We also post the versions of the paper that were used during peer review. These are the versions that the peer review comments apply to.

The versions of the paper that follow are the versions that were submitted during the peer review process. They are not the versions of record or the final published versions. They should not be cited or distributed as the published version of this manuscript.

BMJ Open is an open access journal and the full, final, typeset and author-corrected version of record of the manuscript is available on our site with no access controls, subscription charges or pay-per-view fees (<http://bmjopen.bmj.com>).

If you have any questions on BMJ Open's open peer review process please email [info.bmjopen@bmj.com](mailto:info.bmjopen@bmj.com)

# BMJ Open

## The association between Tendon Ruptures and Use of Fluoroquinolone, and other oral antibiotics in 1.1 million U.S. senior Medicare beneficiaries

|                               |                                                                                                                                                                                          |
|-------------------------------|------------------------------------------------------------------------------------------------------------------------------------------------------------------------------------------|
| Journal:                      | <i>BMJ Open</i>                                                                                                                                                                          |
| Manuscript ID                 | bmjopen-2019-034844                                                                                                                                                                      |
| Article Type:                 | Original research                                                                                                                                                                        |
| Date Submitted by the Author: | 08-Oct-2019                                                                                                                                                                              |
| Complete List of Authors:     | Baik, Seo; National Library of Medicine,<br>Lau, Jason; National Library of Medicine<br>Huser, Vojtech ; National Library of Medicine<br>McDonald, Clement; National Library of Medicine |
| Keywords:                     | CLINICAL PHARMACOLOGY, EPIDEMIOLOGY, ORAL MEDICINE,<br>Musculoskeletal disorders < ORTHOPAEDIC & TRAUMA SURGERY                                                                          |
|                               |                                                                                                                                                                                          |

SCHOLARONE™  
Manuscripts

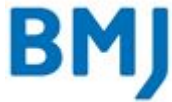

I, the Submitting Author has the right to grant and does grant on behalf of all authors of the Work (as defined in the below author licence), an exclusive licence and/or a non-exclusive licence for contributions from authors who are: i) UK Crown employees; ii) where BMJ has agreed a CC-BY licence shall apply, and/or iii) in accordance with the terms applicable for US Federal Government officers or employees acting as part of their official duties; on a worldwide, perpetual, irrevocable, royalty-free basis to BMJ Publishing Group Ltd ("BMJ") its licensees and where the relevant Journal is co-owned by BMJ to the co-owners of the Journal, to publish the Work in this journal and any other BMJ products and to exploit all rights, as set out in our [licence](#).

The Submitting Author accepts and understands that any supply made under these terms is made by BMJ to the Submitting Author unless you are acting as an employee on behalf of your employer or a postgraduate student of an affiliated institution which is paying any applicable article publishing charge ("APC") for Open Access articles. Where the Submitting Author wishes to make the Work available on an Open Access basis (and intends to pay the relevant APC), the terms of reuse of such Open Access shall be governed by a Creative Commons licence – details of these licences and which [Creative Commons](#) licence will apply to this Work are set out in our licence referred to above.

Other than as permitted in any relevant BMJ Author's Self Archiving Policies, I confirm this Work has not been accepted for publication elsewhere, is not being considered for publication elsewhere and does not duplicate material already published. I confirm all authors consent to publication of this Work and authorise the granting of this licence.

1  
2  
3  
4 **The association between Tendon Ruptures and Use of Fluoroquinolone, and other oral**  
5 **antibiotics in 1.1 million U.S. senior Medicare beneficiaries**  
6  
7  
8  
9

10  
11 **Seo Biak, PhD, Jason J. Lau, MD, Vojtech Huser, MD, PhD, Clement J. McDonald, MD**  
12  
13

14  
15  
16 Author Affiliation: Lister Hill National Center for Biomedical Communications, National  
17  
18 Library of Medicine, U.S. National Institutes of Health, Bethesda, Maryland, USA (Drs. Baik,  
19  
20 Huser and McDonald)  
21  
22  
23  
24  
25  
26

27 Address reprint request to Dr. McDonald (corresponding author) at Lister Hill National Center  
28  
29 for Biomedical Communications, National Library of Medicine, U.S. National Institutes of  
30  
31 Health, 8600 Rockville Pike, Building 38A, Room 07N710, Bethesda, Maryland 20894, USA  
32  
33

34 Telephone: +1 (301) 496-4441  
35

36 E-mail: ClemMcDonald@mail.nih.gov  
37  
38  
39  
40  
41  
42  
43

44 **3609 Words (4000 MAX;)**  
45  
46  
47  
48  
49  
50  
51  
52  
53  
54  
55  
56  
57  
58  
59  
60

1  
2  
3 **Abstract (Max 300 words, 294 now)**  
4

5 **Objectives:** To assess the association of fluoroquinolone use with tendon ruptures  
6 compared to no fluoroquinolone and that of the four most commonly prescribed non-  
7 fluoroquinolone antibiotics in the US.  
8  
9  
10  
11  
12  
13

14 **Design:** Prospective observational study.  
15

16 **Setting:** U.S. senior enrolled in the federal old-age, survivors insurance program.  
17

18 **Participants:** 1,186,013 Medicare fee-for-service beneficiaries and their inpatient,  
19 outpatient, prescription drug records were used.  
20  
21  
22

23 **Interventions:** Seven oral antibiotics, fluoroquinolones (ciprofloxacin, levofloxacin,  
24 moxifloxacin) and amoxicillin, amoxicillin-clavulanate, azithromycin and cephalexin.  
25  
26  
27

28 **Primary and Secondary Outcome measures:** All tendon ruptures combined, and three  
29 types of tendon ruptures by anatomic site, Achilles tendon rupture, rupture of rotator cuff  
30 and tendon ruptures on other anatomic sites.  
31  
32  
33

34 **Results:** Of three fluoroquinolones, only levofloxacin exhibited a significant increased  
35 risk of tendon ruptures - 16%, and 112% for rotator cuff and Achilles tendon rupture  
36 respectively in the  $\leq 30$  day window. Ciprofloxacin and moxifloxacin exhibited little to no  
37 increased risk of tendon ruptures. Notably, the risk of levofloxacin never exceeded the  
38 risk of the non-fluoroquinolone, cephalexin in any comparison.  
39  
40  
41  
42  
43  
44  
45  
46

47 Among the non-fluoroquinolone antibiotics, amoxicillin, amoxicillin-clavulanate, and  
48 azithromycin exhibited none to benign risk of tendon rupture. Cephalexin exhibited  
49 modest to large *increased* risk of tendon rupture at  $\leq 30$  day window across all sites and  
50 its risk exceeded the risk for levofloxacin.  
51  
52  
53  
54  
55  
56  
57

1  
2  
3  
4  
5  
6  
7  
8  
9 **Conclusions:** In our study, fluoroquinolones as a class were not associated with the  
10 increased risk of tendon ruptures. Neither ciprofloxacin nor moxifloxacin exhibited any  
11 risk for tendon ruptures. Levofloxacin did exhibit significant increased risk. Cephalexin  
12 with no reported effect on metalloprotease activity had an equal or greater risk than  
13 levofloxacin; so we question whether metalloprotease activity has any relevance to  
14 observed associations with tendon rupture. Confounding by indication bias may be more  
15 relevant and should be given more consideration as explanation for significant  
16 associations in observational studies of tendon rupture.  
17  
18  
19  
20  
21  
22  
23  
24  
25  
26  
27  
28  
29  
30  
31  
32  
33  
34  
35  
36  
37  
38  
39  
40  
41  
42  
43  
44  
45  
46  
47  
48  
49  
50  
51  
52  
53  
54  
55  
56  
57  
58  
59  
60

### Strengths and limitations of this study

- We conducted a large (more than 1 million US senior subjects) prospective study of outpatient prescription drug records to assess the association between the use of fluoroquinolones and the occurrence of tendon ruptures compared to the most commonly used non-fluoroquinolone oral antibiotics.
- Our study included all oral fluoroquinolones (ciprofloxacin, levofloxacin, moxifloxacin) prescribed in the US and the four most commonly prescribed non-fluoroquinolone antibiotics: amoxicillin, amoxicillin-clavulanate, azithromycin and cephalexin as controls.
- In addition to reporting the risk of any tendon rupture, we also reported the risk of three types of tendon ruptures by anatomic site 1) Achilles tendon rupture, 2) rupture of rotator cuff and 3) tendon ruptures on other anatomic sites as separate outcomes.
- This study is possibly only applicable to U.S. senior, aged 65 or more, Medicare fee-for-service beneficiaries.
- We had no options to verify claims diagnoses via chart review.

## Introduction

Fluoroquinolones (FQ) are among the most widely prescribed antibiotics in the outpatient setting[1,2] due to their broad spectrum treatment of bacteria found in respiratory, urinary, joint, and skin infections. Several observational studies have reported the association between the use of FQs and tendinitis and tendon rupture (TR), especially of the Achilles tendon[3–12] and the FDA issued black box warnings to FQ antibiotics beginning in 2008.[13] The warning was updated in 2016 to recommend using alternative antibiotics when possible.[14,15] The fact that FQs upregulate the production of metalloproteinase (MMP) enzymes with collagenase activity that could weaken tendons is taken as a mechanism to explain this reported risk.[16–18]

Studies that reported association between FQ use and TR used one or more other antibiotics as controls. One study compared the FQ rupture rates with patients using azithromycin, the most frequently used oral antibiotic in the US. Only two focused principally on TR risk among the elderly. None compared TR rates of *FQs* with those of cephalexin -- the 3rd most commonly prescribed oral antibiotic in the US.

The Virtual Research Data Center (VRDC) of Center for Medicare and Medicaid Services (CMS)[19] carries more than 10 years of Medicare claims, which include information about the usage of prescription drugs and encounter diagnoses (including tendon ruptures). It also carries information about 42 major chronic diseases, demographic characteristic and vital status. We conducted a large observational study using the VRDC to assess the association of FQ antibiotics with TR compared to that of



1  
2  
3 the four most commonly prescribed non-FQ antibiotics in the US. Here we report the  
4  
5 results of that analysis.  
6  
7  
8  
9

## 10 **Methods**

### 11 *Patient and public involvement*

12  
13  
14 Patients or the public were not involved in the design of the study.  
15  
16  
17  
18

### 19 *Study population*

20  
21 We derived our study population from a 20% random sample of Medicare prescription  
22  
23 drug coverage (Part D) fee-for-service enrollees who first enrolled in the Medicare under  
24  
25 old age and survivors insurance within a month of age 65 (779-781 month-old) and on or  
26  
27 after 1/1/2007 - the first full year of Part D prescriptions availability. We included claim  
28  
29 data through 12/31/2016, the end of VRDC claim data available to us. All of the VRDC  
30  
31 data is de-identified and researchers must perform all of their analysis within the VRDC  
32  
33 computer systems, and can only pull statistical results from it.[19] We obtained approvals  
34  
35 for these studies from the CMS privacy board and NIH OHSRP as not human subject  
36  
37 studies.  
38  
39  
40  
41  
42  
43

44 We required subjects to be continuously enrolled in hospital insurance (Part A) and  
45  
46 medical insurance (Part B) to assure we had full outpatient and inpatient claims data,  
47  
48 which are not available for nearly 20% of patients with Part D only.[20] To obtain an  
49  
50 incident cohort of TR patients, we excluded (washed out) individuals with TRs recorded  
51  
52  
53  
54  
55  
56  
57  
58  
59  
60

1  
2  
3 in the first year of their Medicare entitlement.[21] In order to assure sufficient follow-up,  
4  
5 we excluded patients with less than 1-year follow-up (See Figure 1 Consort Diagram).  
6  
7  
8  
9

### 10 Primary Outcome

11  
12 We identified patients with TR based upon International Classification of Diseases  
13  
14 (ICD)-9-CM codes of 726.13, 727.60-727.69, and ICD-10-CM codes of M66.2, M66.3,  
15  
16 M66.8, M66.9, and M75.1. We combined all TRs and reported them as one outcome, and  
17  
18 report three types of TRs by anatomic site 1) Achilles tendon rupture, 2) rupture of  
19  
20 rotator cuff and 3) TRs on other anatomic sites as separate outcomes. We focused on  
21  
22 Achilles TR because it was the sole focus of many prior studies and on rotator cuff TR  
23  
24 because it is the predominant TR of the elderly. We lumped the remaining as “other  
25  
26 TRs”.  
27  
28  
29  
30  
31  
32

### 33 Study antibiotics

34  
35 As a study antibiotic, we included all three oral FQs prescribed in the US -- moxifloxacin  
36  
37 (MXF), ciprofloxacin (CIP), levofloxacin (LVX), which is the active stereoisomer of  
38  
39 ofloxacin. As controls, we also included the four most frequently prescribed non-FQ oral  
40  
41 antibiotics - amoxicillin (AMX), amoxicillin clavulanate (AMC), azithromycin (AZT)  
42  
43 and cephalixin (LEX). Five of our study antibiotics, AZT, AMX, AMC, CIP and LEX,  
44  
45 were the top five U.S. antibiotic agents in 2011.  
46  
47  
48  
49  
50

### 51 Statistical Analysis

1  
2  
3 We analyzed each of the four TR outcomes in separate Fine-Gray competing risk  
4 regression analyses with death as the competing risk.[22,23] Patients became eligible for  
5 “the study” at their Medicare enrollment but prescription data did not become available  
6 until their Part D enrollment. We followed them from their entry in Part D (while  
7 accounting for left truncation[24]) until their death, switch to a capitated plan,  
8 disenrollment from Medicare or 12/31/2016 – whichever came first. We adjusted hazard  
9 ratio (HR) of each study antibiotic for concurrent use of other study antibiotics and  
10 adjusted for calendar year of subject’s Part D entry, to account for secular trends. We also  
11 adjusted each HR for patient’s characteristics, income, gender, race, rural residency  
12 (Yes/No) and also for 42 chronic conditions from the Medicare Master Beneficiary  
13 Summary File (MBSF)[25] with >1% prevalence, as a measure of overall health. Based  
14 upon monthly indicators of dual-eligibility and Low Income Subsidy (LIS) status, we  
15 separated study individuals into three groups: 1) dual whose income is <135% Federal  
16 Poverty Line (FPL); 2) non-dual LIS whose income is between 135 and 150% FPL; and  
17 non-dual no LIS whose income is >150% FPL. We used this variable in the analysis as a  
18 surrogate for economic status.[26]

19  
20  
21 We assumed that patients were on a given kind of study drug from the prescription  
22 dispensing date to the end of days of supply. We did not distinguish between different  
23 brands of a study drugs. Following the approach of prior studies,[3–5] we separated  
24 subjects by temporal exposure within each study drug, including groups for never  
25 exposed, exposed within 30 days, 31-60 days, and >60 days. Thus, by this approach we  
26 could detect the presumed short term action of the FQ’s on tendons and avoid the risk of

1  
2  
3 non-differential misclassification that can occur with too simple (yes/no) drug exposure  
4 measures.[27] In order to minimize the immortal time bias, we treated all drug usage  
5 measures and all patients characteristics, except gender and race, as time-varying  
6 covariates.[28,29] In order to mitigate selection bias toward use of any study antibiotics,  
7 we employed a propensity score (PS) approach.[30,31] We first derived a PS of taking  
8 any of study antibiotics as a function of patient's characteristics at the date of the first  
9 antibiotic use after Part D entry from a multiple logistic regression. We used the median  
10 days to the first study antibiotic use in patients taking study antibiotics as the cutoff time  
11 for subjects taking no study antibiotics. We performed our analyses with an inverse  
12 propensity score weight (IPSW) excluding individuals with the PS below 0.1 and above  
13 0.9, to mitigate poorer performance in the presence of a strong treatment-selection  
14 process.[32] In post-hoc analyses, we also compared the risk of TR of each study  
15 antibiotics to that of every other study antibiotic on a pairwise basis.  
16  
17  
18  
19  
20  
21  
22  
23  
24  
25  
26  
27  
28  
29  
30  
31  
32  
33  
34

## 35 **Results**

### 36 *Study population and Secular trend*

37  
38 From our 20% sample of Part D enrollees, 1,186,013 patients satisfied all our selection  
39 criteria including the washout of individuals with TR in their first year of Medicare  
40 (Figure 1 Consort Diagram). Follow-up began with an individual's enrollment in Part D  
41 program (median (IQR) 0 (0-122) days from the Medicare entitlement). We followed  
42 them for a median of 3.7 years (total 4,736,653 patient-years) until the their first  
43 diagnosis of TR (3.7%), death (5.0%), switch from fee-for-service to health maintenance  
44 organization (HMO) plans (12.5%), disenrollment from Medicare (<1%) or study end on  
45  
46  
47  
48  
49  
50  
51  
52  
53  
54  
55  
56  
57  
58  
59  
60

1  
2  
3 12/31/2016 (78.8%), whichever came first. Patients had their first post enrollment claim  
4 with a diagnosis of TR at a median age of 68.5 (IQR 67.2-70.4). The proportions of non-  
5  
6 Hispanic White, female and rural residents were 81.2%, 57.9%, and 22.7% respectively.  
7  
8 About a fifth of patients received federal/state subsidies, i.e. Medicaid coverage on top of  
9  
10 Medicare (dual 16.1%) or assistance in paying their Part D premium and  
11  
12 coinsurance/copayment (non-dual LIS 2.6%). Among the 42 Medicare chronic disease  
13  
14 covariates, hypertension (68.5%), hyperlipidemia (69.5%), cataract (47.2%), rheumatoid  
15  
16 arthritis/osteoarthritis (38.6%), anemia (32.0%), ischemic heart disease (27.5%), and  
17  
18 chronic kidney disease (18.7%) were the seven most prevalent (Table 1).  
19  
20  
21  
22  
23  
24  
25

26 Of the 438,387 (37.0%) study patients who took a FQ prescription, 71.8%, 49.5% and  
27  
28 5.3% ever took CIP, LVX and MXF respectively. Of 737,446 (62.2%) of patients who  
29  
30 took a non-FQ antibiotic, the figures were 55.9%, 46.2%, 35.2% and 33.0% for AZM,  
31  
32 AMX, LEX, and AMC, respectively. Patients who took one or more study antibiotics  
33  
34 took a median (IQR) of 3.0 (1.0-6.0) study antibiotic prescriptions and took a median  
35  
36 (IQR) 2.0 (1.0-3.0) different study antibiotics during the observation period.  
37  
38  
39  
40  
41

42 Secular trends in study antibiotics usage existed. MXF usage declined precipitously from  
43  
44 5.0% in 2007 to almost zero in 2016 – overweighting the MXF statistics for early entrants  
45  
46 into Medicare and yielding a longer mean follow up time. CIP use hit a peak, and LVX, a  
47  
48 nadir, in 2011. The use of AMX, AMC and LEX trended slowly upward (Supplementary  
49  
50 Figure 1). The mode (median) of supply durations for each antibiotics were 10 (7) for  
51  
52 AMX, 10 (10) for AMC, 5 (5) for AZM, 10 (7) for LEX, 7 (7) for CIP, 10 (7) for LVX,  
53  
54  
55  
56  
57  
58  
59  
60

1  
2  
3 10 (11) for MXF. About thirty percent of patients were never exposed to any one of the  
4  
5 study antibiotics during the study period.  
6  
7

8  
9  
10 Unadjusted figures for TR prevalence across each of the seven study antibiotic users and  
11  
12 the no study antibiotic users ranged from a high of 5.6% for MXF to a low of 3.0% for no  
13  
14 antibiotic (Table 1). Except for MXF, the *unadjusted* prevalence of TRs associated with  
15  
16 each non-FQ antibiotic was *greater than* or equal to that of each FQ antibiotic. The TR  
17  
18 rates per 1000 patient-years followed the same pattern, with the non-FQ antibiotics  
19  
20 topping the rates of all FQs except MXF (which had the highest rate), possibly due to  
21  
22 overweighting of MXF usage in the early years of the study. The study subjects who ever  
23  
24 took an FQ had the highest unadjusted rate of death per 1000 person-years. LVX's death  
25  
26 rate was nearly twice the rate of each non-FQ antibiotics. The size of the associations  
27  
28 with diseases like diabetes, chronic renal failure and heart failure paralleled the  
29  
30 magnitude of the death rates and was generally higher with FQs than non-FQ antibiotics  
31  
32 (Table 1).  
33  
34  
35  
36  
37  
38  
39  
40  
41  
42  
43

#### 44 Primary Analysis

45 Table 2 presents HRs for all covariates in our Fine-Gray competing risk regression with  
46  
47 IPSW, for all tendon ruptures taken together. Being a female (vs. male), African-  
48  
49 American, Hispanic, and Asian (vs. white), being Dual or non-Dual LIS (vs. non-Dual no  
50  
51 LIS) and living in a rural area were all associated with a *reduced* risk of tendon rupture.  
52  
53 These risk reductions were 24% or more for all but Hispanics and rural residency  
54  
55  
56  
57  
58  
59  
60

1  
2  
3 covariates, and the reductions were similar across all anatomic sites. In general, life  
4 threatening chronic disease, such as COPD, heart failure and colorectal/lung/endometrial  
5 cancers were associated with a lower risk of TR in a range of 15-60% below control  
6 possibly due to constrained physical activity and/or shortened life span. Notably, diabetes  
7 and chronic renal disease, previously reported as risk factors for TR,[33,34] exhibited no  
8 increased TR risk. Mobility impairments had reduced risk of TR similar to that of the  
9 severe life threatening diseases, likely due to reduced activity. Most diseases with low  
10 life threats such as cataract, glaucoma, depression, asthma, hyperlipidemia, hypertension,  
11 prostatic hyperplasia, migraine/other chronic headache, and deafness/hearing impairment  
12 exhibited risks of 10 to 40% *above* controls probably for reasons related to longer life  
13 spans and less inhibited activity. Ischemic heart did not fit the mold of sicker equals  
14 lower TR risk. Patients with rheumatoid arthritis/osteoarthritis were a special case and  
15 had TR risk of 183% *above* control possibly due to joint and associated tendon  
16 inflammation with these disorders. Fibromyalgia/chronic pain and fatigue also exhibited  
17 a 40% increased risk of TR possibly also due to an inflammatory component.

18  
19  
20  
21  
22  
23  
24  
25  
26  
27  
28  
29  
30  
31  
32  
33  
34  
35  
36  
37  
38  
39 The Achilles tendon carries the full force of the extra weight carried by obese patients  
40 and obesity was associated with a significant (21%) increase in Achilles TR ruptures  
41 while its effect on other TR classes was significant but miniscule (4-6%) (Data not  
42 shown).

### 43 44 45 46 47 48 49 ***Effect of antibiotics***

50  
51  
52 Table 3 shows the risk associated with each study antibiotic broken down by time lag  
53 between the antibiotic use and the claim reported TR, as well as by anatomic sites. Of the  
54  
55  
56  
57

1  
2  
3 total 44,098 patients with any TR occurrence, complete rupture of rotator cuff  
4 represented the major share (80.7%), followed by other TRs (16.8%) and Achilles TR  
5 (2.5%). In the survival analysis we followed patients until the first occurrence of TR; so,  
6 these figures count only the first TR occurrence independent of anatomic site.  
7  
8  
9  
10

11  
12  
13 Of the non-FQ antibiotics, AMX exhibited a reduced risk of TR compared to no AMX in  
14 every tendon class and time window, similar to its low risk in previous studies. It  
15 exhibited a significantly lower risk in the 30, and 60-day window except for the Achilles  
16 tendon. AZM and AMC exhibited a similar benign risk in all time windows except for  
17 TR of rotator cuff in >60 days window  
18  
19  
20  
21  
22  
23  
24  
25

26 LEX was the surprise non-FQ antibiotic. It exhibited modest to large *increased* TR risk at  
27  $\leq 30$  days across all sites ranging from a low of 16% increase for complete rupture of  
28 rotator cuff to a high 114% increase for Achilles TR. Its risk was also significantly  
29 higher at each time window for all TRs taken together.  
30  
31  
32  
33  
34  
35

36 Of the FQs, CIP, the most frequently prescribed FQ, and MXF, the least frequently  
37 prescribed FQ, exhibited little to no increased risk of TR within each anatomic site and  
38 each time frame (Table 3). LVX is the only FQ to exhibit a significant *increase* in TR  
39 risk - of 16%, and 112% for rupture of rotator cuff and Achilles TR respectively in the  
40  $\leq 30$  day window. Notably, the risk of LVX never exceeded the risk of the non-FQ, LEX  
41 in any comparison.  
42  
43  
44  
45  
46  
47  
48  
49  
50

51 In a post-hoc analysis (Table 4), we compared the TR risk of each antibiotic with every  
52 other antibiotic (pairwise comparisons of FQ vs. FQ and FQ vs. non-FQ), for  $\leq 30$  day  
53 window. These results paralleled the above-mentioned risk for each study antibiotic.  
54  
55  
56  
57



1  
2  
3 Again, TR risk for LVX was greater than that of CIP, MXF, AMC, AMX, and AZM in a  
4  $\leq 30$  day window. However, LVX risk was comparable to that of LEX for Achilles TR  
5  
6 and rupture of rotator cuff and significantly lower than LEX for the other TR class. When  
7  
8 comparing the risk of FQs as a class against that of non-FQ antibiotics, most of the non-  
9  
10 FQ antibiotics had significantly greater risk than the FQ class as a whole across all TR  
11  
12 sites.  
13  
14  
15  
16  
17  
18  
19

## 20 **Discussion**

21  
22 Our results conflict with the common assertion that the Achilles tendon rupture is the  
23 most common, up to 90% of tendon ruptures.[35] In our elderly cohort, Achilles TRs  
24 were a tiny proportion (2.9 %) of all ruptures. Some of this difference may be explained  
25 by the differences in demographics. Reports of high prevalence of Achilles TR came  
26 from studies of young military populations.[36,37] In contrast, our data came from an  
27 elderly Medicare population. Some of the difference could also be due to less ability to  
28 diagnose non-Achilles tendon ruptures without 3D joint imaging.  
29  
30  
31  
32  
33  
34  
35  
36  
37  
38  
39  
40

41 Many authorities describe the relationship between FQs and TRs as a class “effect”.  
42  
43 However, FQs as a class had no significant risk of TR compared with each of the three  
44 non-FQ antibiotics in any time window. Further, neither MXF (n= 23,207 subjects) nor  
45 CIP (n=314,864 subjects), the oral FQ with the greatest use and with a greater effect on  
46 metalloproteases than other FQs,[38–40] had any TR risk at any anatomic site in any time  
47 window. CIP’s lack of risk is consistent with two studies[5,9] in which CIP exhibited  
48 zero risk or small risks compared to ofloxacin, a racemic mixture whose active ingredient  
49  
50  
51  
52  
53  
54  
55  
56  
57  
58  
59  
60

1  
2  
3 is the levo-isomer, LVX. We do see a strong association between LVX and TRs whether  
4  
5 we used no LVX or three of the non-FQ antibiotics as controls. However, with LEX, the  
6  
7 one cephalosporin as comparator, this association disappears.  
8  
9

10  
11  
12 One previous study described the effect of FQs on TR risk as small and unimportant.[10]  
13  
14 Two studies reported no effect of FQs on TR risk.[9,11] At least 7 previous observational  
15  
16 studies reported increased risks of TR after the use of FQ.[3–8,12] However, in all but  
17  
18 one study, the TR event rates were very low (between 5 and 111) among patients taking  
19  
20 an FQ. In comparison, our study included 17,949 (4.1%) such patients. One previous  
21  
22 study did report a large number of events, 23,000 (3.5%) patients with TRs while on FQs  
23  
24 and, like our study, it also focused exclusively on elderly patients.[3] However, it did not  
25  
26 compare FQ use against no FQ use (but against times when FQ's were used and not used  
27  
28 in one patient population so they could not adjust for the different levels of clinical  
29  
30 attention at visits requiring a systemic antibiotic vs visits that did not). Furthermore, they  
31  
32 assessed the association between AMX and TRs in separate analysis and used the risk of  
33  
34 TRs in that analysis as the comparator for the risk observed in the FQ analysis. But AMX  
35  
36 treated patients are likely at much lower acuity level (per our data) introducing large  
37  
38 possible differential biases into that comparison. Furthermore, their analysis did not  
39  
40 include death as a competing risk as is recommend when death rates exceed event  
41  
42 rates.[23] They reported no death rates, but death rates in their study likely exceeded their  
43  
44 event rates given the similarity of their population with ours.  
45  
46  
47  
48  
49  
50  
51  
52  
53  
54  
55  
56  
57  
58  
59  
60

1  
2  
3 According to our data, the AMX treated patients had fewer comorbidities (as was also  
4 true in Daneman's study), almost 14% fewer hospitalizations and half of death rate per  
5 1000 patient-years, compared to patients taking LVX. So the two populations are not  
6 comparable. LVX appears to be reserved for more severe infections or more fragile  
7 patients and thus subject to differential biases.  
8  
9  
10  
11  
12  
13  
14  
15  
16

17 The reported activation of metalloprotease activity by FQs has underpinned the idea of a  
18 causal link between FQs and TRs. The argument goes as follows: FQs stimulate  
19 metalloproteases, which can break down collagen; the tendon is made of collagen; so FQs  
20 may cause TRs. However, our data disrupts this argument. CIP which strongly *stimulates*  
21 MMP activity,[17,18] exhibited *no* risk of TRs in our study, and LEX which *inhibits*  
22 MMP activity[41,42] exhibited a *large* risk. So we have to question whether  
23 metalloprotease activity has any relevance to TR risk, and consider other explanations for  
24 the observed associations.  
25  
26  
27  
28  
29  
30  
31  
32  
33  
34  
35  
36  
37

38 The indication for an antibiotic is a presumed bacterial infection. The reported  
39 associations between antibiotics and TR could be consequence of the indication rather  
40 than the antibiotic itself and be an example of the confounding by indication bias.[43]  
41 Such a bias could explain many reported associations between drugs and TR risk  
42 including associations with non-antibiotic drugs reported by Nyysönen.[8]  
43  
44  
45  
46  
47  
48  
49  
50

51 This bias could manifest in two ways. First, that the bacterial infection might directly  
52 increase the risk of TR via stimulation of general immune or cytokine responses, or by  
53  
54  
55  
56  
57

1  
2  
3 bacterial invasion. A recent study found gram-positive bacteria in a major share of  
4 ruptured tendons but not in “control” tendons removed surgically for grafting,[44] giving  
5 some plausibility to this hypothesis.  
6  
7  
8  
9

10  
11  
12 Secondly, the greater clinical attention likely focused on patients needing systemic  
13 antibiotics, especially those with severe infections, could increase the chance of noticing  
14 and documenting a pre-existing TR. Furthermore, a reservoir of such cases is likely to  
15 exist, because patients do not necessarily correctly identify joint and extremity symptoms  
16 as TRs and seek immediate care for them. Tendon ruptures of the shoulder capsule, for  
17 example, are notorious for developing symptoms slowly over 2-3 years[45] before being  
18 correctly diagnosed. Even Achilles tendon ruptures, can be missed (in 30% of cases) at  
19 the first presentation.[46] Seeger et al. reviewed the medical records of patients with an  
20 insurance claim reporting TRs following antibiotic use and found that nearly half of the  
21 TRs recorded in the claims were either something else (e.g., Bursa inflammation  
22 miscoded as a TR) or the chart had occurred before the antibiotic use but only seen in a  
23 claim after antibiotic use.[11]  
24  
25  
26  
27  
28  
29  
30  
31  
32  
33  
34  
35  
36  
37  
38  
39  
40  
41

42 We cannot conclude that confounding by indication fully explains the observed TR  
43 associations with LEX and LVX, but they are candidates that should be considered before  
44 we rush to causal judgements about such associations.  
45  
46  
47  
48  
49  
50

## 51 **Limitation**

52  
53  
54  
55  
56  
57

1  
2  
3 This study faces all of the limitations of observational studies. Furthermore, it applies  
4 only to fee-for-service Medicare populations. In addition, we had no options to verify  
5 claims diagnoses via chart review.  
6  
7  
8  
9

10  
11  
12  
13 **Funding:** This study is supported by the Intramural Research Program of the National  
14 Library of Medicine, National Institutes of Health. National Library of Medicine had no  
15 role in data collection, study design, conduct and reporting.  
16  
17  
18  
19

20  
21  
22  
23  
24 **Acknowledgements:** This work was partially supported by the Intramural Research  
25 Program of the National Library of Medicine, National Institutes of Health.  
26  
27  
28  
29

30 This research was made possible through the National Institutes of Health (NIH) Medical  
31 Research Scholars Program, a public-private partnership supported jointly by the NIH  
32 and generous contributions to the Foundation for the NIH from the Doris Duke  
33 Charitable Foundation, Genentech, the American Association for Dental Research, the  
34 Colgate-Palmolive Company, Elsevier, alumni of student research programs, and other  
35 individual supporters via contributions to the Foundation for the National Institutes of  
36 Health. For a complete list, please visit the Foundation website at:  
37  
38  
39  
40  
41  
42  
43  
44  
45

46  
47 <http://fnih.org/what-we-do/current-education-and-training-programs/mrsp>  
48  
49

50  
51 **Competing interests:** None to declare.  
52

53 **Author's Contribution:** SB: study conception, design, analysis and interpretation;  
54 critical review of study content; manuscript drafting; approval of the final manuscript. JL:  
55  
56  
57

1  
2  
3 study concept and interpretation; manuscript drafting; approval of the final manuscript.  
4

5 VH: study conception and interpretation; manuscript drafting; approval of the final  
6  
7 manuscript. CJM: study conception, design and interpretation; critical review of study  
8  
9 content; manuscript drafting; approval of the final manuscript.  
10  
11  
12  
13

14 **Patient Consent for publication:** Not required.  
15  
16

17  
18  
19 **Data availability:** Available upon reasonable request.  
20  
21  
22  
23  
24  
25  
26  
27  
28  
29  
30  
31  
32  
33  
34  
35  
36  
37  
38  
39  
40  
41  
42  
43  
44  
45  
46  
47  
48  
49  
50  
51  
52  
53  
54  
55  
56  
57  
58  
59  
60

## References

- 1 Hicks LA, Bartoces MG, Roberts RM, *et al.* US outpatient antibiotic prescribing variation according to geography, patient population, and provider specialty in 2011. *Clin Infect Dis* 2015;**60**:1308–16. doi:10.1093/cid/civ076
- 2 Magill SS, Edwards JR, Beldavs ZG, *et al.* Prevalence of Antimicrobial Use in US Acute Care Hospitals, May-September 2011. *JAMA* 2014;**312**:1438. doi:10.1001/jama.2014.12923
- 3 Daneman N, Lu H, Redelmeier DA. Fluoroquinolones and collagen associated severe adverse events: a longitudinal cohort study. *BMJ Open* 2015;**5**:e010077. doi:10.1136/bmjopen-2015-010077
- 4 Morales DR, Slattery J, Pacurariu A, *et al.* Relative and Absolute Risk of Tendon Rupture with Fluoroquinolone and Concomitant Fluoroquinolone/Corticosteroid Therapy: Population-Based Nested Case–Control Study. *Clin Drug Investig* 2019;**39**:205–13. doi:10.1007/s40261-018-0729-y
- 5 van der Linden PD, Sturkenboom MCJM, Herings RMC, *et al.* Increased Risk of Achilles Tendon Rupture With Quinolone Antibacterial Use, Especially in Elderly Patients Taking Oral Corticosteroids. *Arch Intern Med* 2003;**163**:1801. doi:10.1001/archinte.163.15.1801
- 6 Wise BL, Peloquin C, Choi H, *et al.* Impact of age, sex, obesity, and steroid use on

- 1  
2  
3 quinolone-associated tendon disorders. *Am J Med* 2012;**125**:1228.e23-1228.e28.  
4  
5 doi:10.1016/j.amjmed.2012.05.027  
6  
7  
8 7 Sode J, Obel N, Hallas J, *et al*. Use of fluoroquinolone and risk of Achilles tendon rupture:  
9  
10 a population-based cohort study. *Eur J Clin Pharmacol* 2007;**63**:499–503.  
11  
12 doi:10.1007/s00228-007-0265-9  
13  
14  
15 8 Nyssönen T, Lantto I, Lüthje P, *et al*. Drug treatments associated with Achilles tendon  
16  
17 rupture. A case-control study involving 1118 Achilles tendon ruptures. *Scand J Med Sci*  
18  
19 *Sports* 2018;**28**:2625–9. doi:10.1111/sms.13281  
20  
21  
22 9 WILTON L V., PEARCE GL, MANN RD. A comparison of ciprofloxacin, norfloxacin,  
23  
24 ofloxacin, azithromycin and cefixime examined by observational cohort studies. *Br J Clin*  
25  
26 *Pharmacol* 2003;**41**:277–84. doi:10.1046/j.1365-2125.1996.03013.x  
27  
28  
29 10 Jupiter DC, Fang X, Ashmore Z, *et al*. The Relative Risk of Achilles Tendon Injury in  
30  
31 Patients Taking Quinolones. *Pharmacother J Hum Pharmacol Drug Ther* 2018;**38**:878–  
32  
33 87. doi:10.1002/phar.2162  
34  
35  
36 11 Seeger JD, West WA, Fife D, *et al*. Achilles tendon rupture and its association with  
37  
38 fluoroquinolone antibiotics and other potential risk factors in a managed care population.  
39  
40 *Pharmacoepidemiol Drug Saf* 2006;**15**:784–92. doi:10.1002/pds.1214  
41  
42  
43 12 Hori K, Yamakawa K, Yoshida N, *et al*. Detection of fluoroquinolone-induced tendon  
44  
45 disorders using a hospital database in Japan. *Pharmacoepidemiol Drug Saf* 2012;**21**:886–  
46  
47 9. doi:10.1002/pds.3285  
48  
49  
50 13 Tanne JH. FDA adds ‘black box’ warning label to fluoroquinolone antibiotics. *BMJ*  
51  
52 2008;**337**:a816. doi:10.1136/bmj.a816  
53  
54  
55 14 Food and Drug Administration. FDA Drug Safety Communication: FDA advises  
56  
57  
58  
59  
60



- 1  
2  
3 restricting fluoroquinolone antibiotic use for certain uncomplicated infections; warns  
4 about disabling side effects that can occur together | FDA.  
5  
6 [https://www.fda.gov/drugs/drug-safety-and-availability/fda-drug-safety-communication-](https://www.fda.gov/drugs/drug-safety-and-availability/fda-drug-safety-communication-fda-advises-restricting-fluoroquinolone-antibiotic-use-certain)  
7 [fda-advises-restricting-fluoroquinolone-antibiotic-use-certain](https://www.fda.gov/drugs/drug-safety-and-availability/fda-drug-safety-communication-fda-advises-restricting-fluoroquinolone-antibiotic-use-certain) (accessed 12 Jun 2019).  
8  
9  
10  
11  
12 15 Food and Drug Administration. FDA Drug Safety Communication: FDA updates  
13 warnings for oral and injectable fluoroquinolone antibiotics due to disabling side effects |  
14 FDA. [https://www.fda.gov/drugs/drug-safety-and-availability/fda-drug-safety-](https://www.fda.gov/drugs/drug-safety-and-availability/fda-drug-safety-communication-fda-updates-warnings-oral-and-injectable-fluoroquinolone-antibiotics)  
15 [communication-fda-updates-warnings-oral-and-injectable-fluoroquinolone-antibiotics](https://www.fda.gov/drugs/drug-safety-and-availability/fda-drug-safety-communication-fda-updates-warnings-oral-and-injectable-fluoroquinolone-antibiotics)  
16 (accessed 12 Jun 2019).  
17  
18  
19  
20  
21  
22  
23  
24 16 Del Buono A, Oliva F, Osti L, *et al.* Metalloproteases and tendinopathy. *Muscles*  
25 *Ligaments Tendons J* 2013;**3**:51–7. doi:10.11138/mltj/2013.3.1.051  
26  
27  
28  
29 17 Tsai WC, Hsu CC, Chen CPC, *et al.* Ciprofloxacin up-regulates tendon cells to express  
30 matrix metalloproteinase-2 with degradation of type i collagen. *J Orthop Res* 2011;**29**:67–  
31 73. doi:10.1002/jor.21196  
32  
33  
34  
35  
36 18 Corps AN, Harrall RL, Curry VA, *et al.* Ciprofloxacin enhances the stimulation of matrix  
37 metalloproteinase 3 expression by interleukin-1 $\beta$  in human tendon-derived cells: A  
38 potential mechanism of fluoroquinolone-induced tendinopathy. *Arthritis Rheum*  
39 2002;**46**:3034–40. doi:10.1002/art.10617  
40  
41  
42  
43  
44  
45 19 CMS Virtual Research Data Center (VRDC) | ResDAC. [https://www.resdac.org/cms-](https://www.resdac.org/cms-virtual-research-data-center-vrdc)  
46 [virtual-research-data-center-vrdc](https://www.resdac.org/cms-virtual-research-data-center-vrdc) (accessed 4 Oct 2019).  
47  
48  
49  
50 20 Cubanski J, Swoope C, Boccuti C, *et al.* A Primer on Medicare. 2015.  
51 [http://files.kff.org/attachment/report-a-primer-on-medicare-key-facts-about-the-medicare-](http://files.kff.org/attachment/report-a-primer-on-medicare-key-facts-about-the-medicare-program-and-the-people-it-covers)  
52 [program-and-the-people-it-covers](http://files.kff.org/attachment/report-a-primer-on-medicare-key-facts-about-the-medicare-program-and-the-people-it-covers) (accessed 7 Feb 2019).  
53  
54  
55  
56  
57  
58  
59  
60

- 1  
2  
3 21 Johnson ES, Bartman BA, Briesacher BA, *et al.* The incident user design in comparative  
4 effectiveness research. *Pharmacoepidemiol Drug Saf* 2013;**22**:1–6. doi:10.1002/pds.3334  
5  
6  
7  
8 22 Fine JP, Gray RJ. A Proportional Hazards Model for the Subdistribution of a Competing  
9 Risk. *J Am Stat Assoc* 1999;**94**:496. doi:10.2307/2670170  
10  
11  
12 23 Berry SD, Ngo L, Samelson EJ, *et al.* Competing risk of death: An important  
13 consideration in studies of older adults. *J Am Geriatr Soc* 2010;**58**:783–7.  
14  
15  
16  
17 doi:10.1111/j.1532-5415.2010.02767.x  
18  
19 24 Putter H, Fiocco M, Geskus RB. Tutorial in biostatistics: competing risks and multi-state  
20 models. *Stat Med* 2007;**26**:2389–430. doi:10.1002/sim.2712  
21  
22  
23 25 The Chronic Condition Warehouse. Chronic Conditions Data Warehouse: CCW Chronic  
24 Condition Algorithms. <https://www.ccwdata.org/web/guest/condition-categories> (accessed  
25 23 Jan 2017).  
26  
27  
28  
29 26 The Medicare Payment Advisory Commission. MedPAC Data book: Beneficiaries dually  
30 eligible for Medicare and Medicaid - January 2016. 2016.  
31  
32  
33  
34  
35  
36  
37  
38  
39  
40  
41  
42  
43  
44  
45  
46  
47  
48  
49  
50  
51  
52  
53  
54 29 Shintani AK, Girard TD, Eden SK, *et al.* Immortal time bias in critical care research:  
55  
56  
57  
58  
59  
60

- 1  
2  
3 application of time-varying Cox regression for observational cohort studies. *Crit Care*  
4  
5 *Med* 2009;**37**:2939–45. doi:10.1097/CCM.0b013e3181b7fbbb  
6  
7  
8 30 Rosenbaum PR, Rubin DB. The Central Role of the Propensity Score in Observational  
9  
10 Studies for Causal Effects. *Biometrika* 1983;**70**:41–55.  
11  
12 31 Austin PC. An Introduction to Propensity Score Methods for Reducing the Effects of  
13  
14 Confounding in Observational Studies. *Multivariate Behav Res* 2011;**46**:399–424.  
15  
16 doi:10.1080/00273171.2011.568786  
17  
18  
19 32 Austin PC, Stuart EA. The performance of inverse probability of treatment weighting and  
20  
21 full matching on the propensity score in the presence of model misspecification when  
22  
23 estimating the effect of treatment on survival outcomes. *Stat Methods Med Res*  
24  
25 2017;**26**:1654–70. doi:10.1177/0962280215584401  
26  
27  
28 33 Zakaria MHB, Davis WA, Davis TME. Incidence and predictors of hospitalization for  
29  
30 tendon rupture in Type 2 diabetes: the Fremantle Diabetes Study. *Diabet Med*  
31  
32 2014;**31**:425–30. doi:10.1111/dme.12344  
33  
34  
35 34 Basic-Jukic N, Juric I, Racki S, *et al.* Spontaneous tendon ruptures in patients with end-  
36  
37 stage renal disease. *Kidney Blood Press Res* 2009;**32**:32–6. doi:10.1159/000201792  
38  
39  
40 35 Khaliq Y, Zhanel GG. Fluoroquinolone-Associated Tendinopathy: A Critical Review of  
41  
42 the Literature. *Clin Infect Dis* 2003;**36**:1404–10. doi:10.1086/375078  
43  
44  
45 36 White DW, Wenke JC, Mosely DS, *et al.* Incidence of Major Tendon Ruptures and  
46  
47 Anterior Cruciate Ligament Tears in US Army Soldiers. *Am J Sports Med* 2007;**35**:1308–  
48  
49 14. doi:10.1177/0363546507301256  
50  
51  
52 37 Owens B, Mountcastle S, White D. Racial Differences in Tendon Rupture Incidence. *Int J*  
53  
54 *Sports Med* 2007;**28**:617–20. doi:10.1055/s-2007-964837  
55  
56  
57  
58  
59  
60

- 1  
2  
3 38 Corps AN, Harrall RL, Curry VA, *et al.* Contrasting effects of fluoroquinolone antibiotics  
4 on the expression of the collagenases, matrix metalloproteinases (MMP)-1 and -13, in  
5 human tendon-derived cells. *Rheumatology* 2005;**44**:1514–7.  
6  
7  
8  
9  
10 doi:10.1093/rheumatology/kei087  
11
- 12 39 Sharma C, Velpandian T, Baskar Singh S, *et al.* Effect of fluoroquinolones on the  
13 expression of matrix metalloproteinase in debrided cornea of rats. *Toxicol Mech Methods*  
14 2011;**21**:6–12. doi:10.3109/15376516.2010.529183  
15  
16  
17  
18
- 19 40 Sbardella D, Tundo G, Fasciglione G, *et al.* Role of Metalloproteinases in Tendon  
20 Pathophysiology. *Mini-Reviews Med Chem* 2014;**14**:978–87.  
21  
22  
23  
24  
25  
26  
27  
28  
29  
30  
31  
32
- 33 41 Santavirta S, Takagi M, Konttinen YT, *et al.* Inhibitory effect of cephalothin on matrix  
34 metalloproteinase activity around loose hip prostheses. *Antimicrob Agents Chemother*  
35 1996;**40**:244–6. doi:10.1128/AAC.40.1.244  
36  
37  
38  
39
- 40 42 Kannan R, Ruff M, Kochins JG, *et al.* Purification of Active Matrix Metalloproteinase  
41 Catalytic Domains and Its Use for Screening of Specific Stromelysin-3 Inhibitors. *Protein*  
42 *Expr Purif* 1999;**16**:76–83. doi:10.1006/PREP.1999.1068  
43  
44  
45  
46
- 47 43 de Koning JS, Klazinga NS, Koudstaal PJ, *et al.* The role of ‘confounding by indication’  
48 in assessing the effect of quality of care on disease outcomes in general practice: results of  
49 a case-control study. *BMC Health Serv Res* 2005;**5**:10. doi:10.1186/1472-6963-5-10  
50  
51  
52  
53
- 54 44 Rolf CG, Fu S-C, Hopkins C, *et al.* Presence of Bacteria in Spontaneous Achilles Tendon  
55 Ruptures. *Am J Sports Med* 2017;**45**:2061–7. doi:10.1177/0363546517696315  
56  
57  
58  
59
- 60 45 Tashjian RZ. Epidemiology, Natural History, and Indications for Treatment of Rotator  
Cuff Tears. *Clin Sports Med* 2012;**31**:589–604. doi:10.1016/J.CSM.2012.07.001

1  
2  
3  
4  
5  
6  
7  
8  
9  
10  
11  
12  
13  
14  
15  
16  
17  
18  
19  
20  
21  
22  
23  
24  
25  
26  
27  
28  
29  
30  
31  
32  
33  
34  
35  
36  
37  
38  
39  
40  
41  
42  
43  
44  
45  
46  
47  
48  
49  
50  
51  
52  
53  
54  
55  
56  
57  
58  
59  
60

46 Christensen I. Rupture of the Achilles tendon; analysis of 57 cases. *Acta Chir Scand*  
1953;**106**:50–60.

**Figure 1. Consort Diagram**

For peer review only

Table 1. Outcome, Medical/Medication Use, Diseases and Patient Characteristics by Type of Antibiotics

| VARIABLE                                | Overall         | FLQ             | CIP             | LVX             | MXF             | AMX             | AZM             | LEX             | AMC             | None           |
|-----------------------------------------|-----------------|-----------------|-----------------|-----------------|-----------------|-----------------|-----------------|-----------------|-----------------|----------------|
| N                                       | 1,186,013       | 438,387         | 314,864         | 216,796         | 23,207          | 340,814         | 412,465         | 259,720         | 243,470         | 358,966        |
| Any Tendon rupture                      | 44,098(3.7)     | 17,949(4.1)     | 12,715(4.0)     | 8,774(4.0)      | 1,308(5.6)      | 13,666(4.0)     | 17,813(4.3)     | 11,397(4.4)     | 9,665(4.0)      | 10,665(3.0)    |
| Death                                   | 58,947(5.0)     | 32,523(7.4)     | 21,093(6.7)     | 21,057(9.7)     | 3,458(14.9)     | 13,801(4.0)     | 21,130(5.1)     | 16,262(6.3)     | 14,315(5.9)     | 14,524(4.0)    |
| Censored at HMO entry                   | 148,155(12.5)   | 38,486(8.8)     | 27,619(8.8)     | 16,383(7.6)     | 2,525(10.9)     | 29,169(8.6)     | 36,628(8.9)     | 20,758(8.0)     | 18,087(7.4)     | 67,111(18.7)   |
| Censored at disenrollment               | 163(0.0)        | 30(0.0)         | 16(0.0)         | 16(0.0)         | 2(0.0)          | 26(0.0)         | 32(0.0)         | 26(0.0)         | 24(0.0)         | 86(0.0)        |
| Censored at DEC 31 2016                 | 934,650(78.8)   | 349,399(79.7)   | 253,421(80.5)   | 170,566(78.7)   | 15,914(68.6)    | 284,152(83.4)   | 336,862(81.7)   | 211,277(81.3)   | 201,379(82.7)   | 266,580(74.3)  |
| Years of follow-up, median(total)       | 3.7(4,736,653)  | 4.4(2,108,848)  | 4.6(1,558,932)  | 4.6(1,071,395)  | 5.8(134,098)    | 4.3(1,642,127)  | 4.4(1,993,833)  | 4.7(1,301,503)  | 4.4(1,180,082)  | 2.4(1,068,045) |
| Tendon ruptures in 1000 person-year     | 9.31            | 8.51            | 8.16            | 8.19            | 9.75            | 8.32            | 8.93            | 8.76            | 8.19            | 9.99           |
| Death in 1000 person-years              | 12.44           | 15.42           | 13.53           | 19.65           | 25.79           | 8.40            | 10.60           | 12.49           | 12.13           | 13.60          |
| Female                                  | 686,191(57.9)   | 268,614(61.3)   | 199,875(63.5)   | 127,986(59.0)   | 14,203(61.2)    | 202,687(59.5)   | 262,764(63.7)   | 153,714(59.2)   | 145,039(59.6)   | 192,297(53.6)  |
| White                                   | 962,892(81.2)   | 368,022(83.9)   | 263,797(83.8)   | 184,123(84.9)   | 19,830(85.4)    | 284,057(83.3)   | 347,625(84.3)   | 223,266(86.0)   | 208,962(85.8)   | 273,667(76.2)  |
| Black                                   | 86,160(7.3)     | 25,870(5.9)     | 18,496(5.9)     | 11,820(5.5)     | 1,395(6.0)      | 20,007(5.9)     | 22,779(5.5)     | 12,447(4.8)     | 12,188(5.0)     | 35,414(9.9)    |
| Hispanic                                | 65,120(5.5)     | 22,403(5.1)     | 16,681(5.3)     | 10,800(5.0)     | 960(4.1)        | 16,221(4.8)     | 19,561(4.7)     | 11,884(4.6)     | 10,514(4.3)     | 24,719(6.9)    |
| Asian                                   | 30,361(2.6)     | 9,596(2.2)      | 7,040(2.2)      | 4,264(2.0)      | 542(2.3)        | 9,856(2.9)      | 10,391(2.5)     | 4,679(1.8)      | 4,574(1.9)      | 10,506(2.9)    |
| Other                                   | 41,480(3.5)     | 12,496(2.9)     | 8,850(2.8)      | 5,789(2.7)      | 480(2.1)        | 10,673(3.1)     | 12,109(2.9)     | 7,444(2.9)      | 7,232(3.0)      | 14,660(4.1)    |
| Dual                                    | 190,474(16.1)   | 72,592(16.6)    | 51,951(16.5)    | 39,324(18.1)    | 4,613(19.9)     | 47,213(13.9)    | 60,955(14.8)    | 42,048(16.2)    | 34,847(14.3)    | 67,807(18.9)   |
| Non-dual LIS                            | 30,839(2.6)     | 10,048(2.3)     | 7,233(2.3)      | 5,077(2.3)      | 589(2.5)        | 6,865(2.0)      | 8,985(2.2)      | 5,564(2.1)      | 5,122(2.1)      | 12,821(3.6)    |
| Non-dual no LIS                         | 964,700(81.3)   | 355,747(81.1)   | 255,680(81.2)   | 172,395(79.5)   | 18,005(77.6)    | 286,736(84.1)   | 342,525(83.0)   | 212,108(81.7)   | 203,501(83.6)   | 278,338(77.5)  |
| Living in rural area                    | 269,718(22.7)   | 105,600(24.1)   | 76,431(24.3)    | 54,376(25.1)    | 4,632(20.0)     | 78,183(22.9)    | 97,183(23.6)    | 66,881(25.8)    | 57,690(23.7)    | 77,621(21.6)   |
| Days on RX, median(IQR)                 | N/A             | N/A             | 10.0(7.0-20.0)  | 10.0(7.0-20.0)  | 10.0(7.0-14.0)  | 10.0(7.0-20.0)  | 6.0(5.0-15.0)   | 10.0(7.0-17.0)  | 10.0(10.0-20.0) | N/A            |
| Hospitalization                         | 349,959(29.5)   | 198,846(45.4)   | 142,538(45.3)   | 113,829(52.5)   | 14,002(60.3)    | 132,304(38.8)   | 156,185(37.9)   | 119,209(45.9)   | 103,515(42.5)   | 51,525(14.4)   |
| Outpatient visits per year, median(IQR) | 19.6(11.1-33.0) | 27.1(17.2-42.7) | 27.3(17.5-42.9) | 30.1(19.0-47.8) | 34.0(21.7-53.7) | 23.6(14.5-37.5) | 24.6(15.5-38.8) | 27.5(17.2-43.2) | 26.6(16.7-42.2) | 12.3(6.0-21.8) |
| AMI                                     | 25,822(2.2)     | 13,365(3.0)     | 9,219(2.9)      | 8,126(3.7)      | 1,075(4.6)      | 8,592(2.5)      | 10,974(2.7)     | 8,329(3.2)      | 7,242(3.0)      | 5,103(1.4)     |
| Atrial Fibrillation                     | 88,563(7.5)     | 43,513(9.9)     | 30,171(9.6)     | 25,198(11.6)    | 3,187(13.7)     | 32,510(9.5)     | 36,148(8.8)     | 29,866(11.5)    | 26,056(10.7)    | 16,536(4.6)    |
| Cataract                                | 559,583(47.2)   | 244,465(55.8)   | 179,419(57.0)   | 122,945(56.7)   | 14,520(62.6)    | 189,761(55.7)   | 232,931(56.5)   | 148,677(57.2)   | 136,980(56.3)   | 125,610(35.0)  |
| Chronic Kidney Disease                  | 221,890(18.7)   | 116,699(26.6)   | 85,372(27.1)    | 65,142(30.0)    | 7,467(32.2)     | 73,023(21.4)    | 90,452(21.9)    | 68,947(26.5)    | 60,172(24.7)    | 43,467(12.1)   |
| COPD                                    | 172,328(14.5)   | 103,941(23.7)   | 65,202(20.7)    | 71,669(33.1)    | 10,259(44.2)    | 58,641(17.2)    | 96,369(23.4)    | 54,994(21.2)    | 55,940(23.0)    | 23,222(6.5)    |
| Heart Failure                           | 129,993(11.0)   | 72,127(16.5)    | 49,366(15.7)    | 45,112(20.8)    | 6,216(26.8)     | 45,517(13.4)    | 58,766(14.2)    | 44,275(17.0)    | 38,781(15.9)    | 22,301(6.2)    |
| Diabetes                                | 344,557(29.1)   | 154,018(35.1)   | 111,041(35.3)   | 81,644(37.7)    | 9,558(41.2)     | 109,157(32.0)   | 134,201(32.5)   | 91,923(35.4)    | 83,309(34.2)    | 82,220(22.9)   |
| Glaucoma                                | 179,324(15.1)   | 75,509(17.2)    | 55,889(17.8)    | 36,817(17.0)    | 4,624(19.9)     | 59,916(17.6)    | 72,717(17.6)    | 45,015(17.3)    | 41,873(17.2)    | 42,576(11.9)   |
| Hip/Pelvic Fracture                     | 9,969(0.8)      | 5,630(1.3)      | 4,169(1.3)      | 3,273(1.5)      | 458(2.0)        | 3,656(1.1)      | 4,196(1.0)      | 3,494(1.3)      | 2,734(1.1)      | 1,733(0.5)     |
| Ischemic Heart Disease                  | 326,305(27.5)   | 160,828(36.7)   | 113,815(36.1)   | 90,604(41.8)    | 11,221(48.4)    | 113,981(33.4)   | 140,977(34.2)   | 96,904(37.3)    | 88,665(36.4)    | 64,072(17.8)   |
| Depression                              | 263,154(22.2)   | 131,795(30.1)   | 96,524(30.7)    | 71,887(33.2)    | 8,813(38.0)     | 91,018(26.7)    | 116,614(28.3)   | 79,419(30.6)    | 73,001(30.0)    | 49,814(13.9)   |
| Alzheimer's Disease Or Senile Dementia  | 47,984(4.0)     | 26,582(6.1)     | 19,523(6.2)     | 15,387(7.1)     | 1,937(8.3)      | 15,125(4.4)     | 19,170(4.6)     | 16,083(6.2)     | 12,919(5.3)     | 9,593(2.7)     |
| Osteoporosis                            | 131,554(11.1)   | 64,596(14.7)    | 48,633(15.4)    | 33,271(15.3)    | 4,594(19.8)     | 46,862(13.8)    | 60,466(14.7)    | 37,260(14.3)    | 34,276(14.1)    | 25,391(7.1)    |
| Rheumatoid Arthritis/Osteoarthritis     | 457,256(38.6)   | 219,767(50.1)   | 161,736(51.4)   | 114,796(53.0)   | 13,468(58.0)    | 171,692(50.4)   | 204,700(49.6)   | 138,911(53.5)   | 123,436(50.7)   | 82,578(23.0)   |
| Stroke/Transient Ischemic Attack        | 72,098(6.1)     | 37,348(8.5)     | 27,127(8.6)     | 21,120(9.7)     | 2,665(11.5)     | 24,161(7.1)     | 30,139(7.3)     | 22,711(8.7)     | 19,678(8.1)     | 14,528(4.0)    |
| Breast Cancer                           | 55,748(4.7)     | 26,507(6.0)     | 19,726(6.3)     | 13,536(6.2)     | 1,548(6.7)      | 18,343(5.4)     | 24,234(5.9)     | 17,211(6.6)     | 14,315(5.9)     | 11,119(3.1)    |

|                                                    |               |               |               |               |              |               |               |               |               |               |
|----------------------------------------------------|---------------|---------------|---------------|---------------|--------------|---------------|---------------|---------------|---------------|---------------|
| Colorectal Cancer                                  | 19,288(1.6)   | 9,912(2.3)    | 7,248(2.3)    | 5,509(2.5)    | 592(2.6)     | 5,739(1.7)    | 7,054(1.7)    | 5,494(2.1)    | 4,875(2.0)    | 4,186(1.2)    |
| Prostate Cancer                                    | 44,960(3.8)   | 25,817(5.9)   | 20,459(6.5)   | 12,558(5.8)   | 972(4.2)     | 14,604(4.3)   | 15,726(3.8)   | 12,260(4.7)   | 10,969(4.5)   | 8,424(2.3)    |
| Lung Cancer                                        | 19,307(1.6)   | 12,412(2.8)   | 7,302(2.3)    | 8,971(4.1)    | 1,415(6.1)   | 5,539(1.6)    | 9,454(2.3)    | 5,617(2.2)    | 6,079(2.5)    | 2,900(0.8)    |
| Endometrial Cancer                                 | 9,025(0.8)    | 4,636(1.1)    | 3,594(1.1)    | 2,299(1.1)    | 267(1.2)     | 2,860(0.8)    | 3,605(0.9)    | 2,653(1.0)    | 2,191(0.9)    | 1,872(0.5)    |
| Anemia                                             | 379,500(32.0) | 192,157(43.8) | 139,042(44.2) | 105,622(48.7) | 12,941(55.8) | 134,693(39.5) | 163,370(39.6) | 112,491(43.3) | 101,770(41.8) | 72,066(20.1)  |
| Asthma                                             | 116,515(9.8)  | 69,444(15.8)  | 44,946(14.3)  | 46,600(21.5)  | 7,161(30.9)  | 41,571(12.2)  | 69,541(16.9)  | 37,221(14.3)  | 39,249(16.1)  | 13,935(3.9)   |
| Hyperlipidemia                                     | 824,020(69.5) | 343,365(78.3) | 248,590(79.0) | 172,542(79.6) | 19,239(82.9) | 263,142(77.2) | 320,295(77.7) | 203,560(78.4) | 190,838(78.4) | 202,679(56.5) |
| Hyperplasia                                        | 147,478(12.4) | 78,374(17.9)  | 59,791(19.0)  | 39,048(18.0)  | 3,968(17.1)  | 51,492(15.1)  | 56,331(13.7)  | 41,857(16.1)  | 38,373(15.8)  | 27,598(7.7)   |
| Hypertension                                       | 812,062(68.5) | 340,354(77.6) | 244,672(77.7) | 174,349(80.4) | 19,336(83.3) | 255,879(75.1) | 310,348(75.2) | 202,254(77.9) | 186,560(76.6) | 203,427(56.7) |
| Hypothyroidism                                     | 241,371(20.4) | 111,526(25.4) | 81,897(26.0)  | 57,796(26.7)  | 6,854(29.5)  | 81,135(23.8)  | 104,685(25.4) | 65,755(25.3)  | 61,689(25.3)  | 50,607(14.1)  |
| Anxiety Disorders                                  | 188,338(15.9) | 99,450(22.7)  | 72,980(23.2)  | 55,437(25.6)  | 6,837(29.5)  | 68,299(20.0)  | 88,527(21.5)  | 58,896(22.7)  | 54,366(22.3)  | 32,009(8.9)   |
| Bipolar Disorder                                   | 22,352(1.9)   | 11,667(2.7)   | 8,668(2.8)    | 6,596(3.0)    | 816(3.5)     | 7,570(2.2)    | 9,470(2.3)    | 7,267(2.8)    | 6,113(2.5)    | 4,295(1.2)    |
| Major Depressive Affective Disorder                | 192,927(16.3) | 100,587(22.9) | 73,797(23.4)  | 55,907(25.8)  | 7,005(30.2)  | 68,188(20.0)  | 87,366(21.2)  | 61,097(23.5)  | 55,544(22.8)  | 34,020(9.5)   |
| Schizophrenia and Other Psychotic Disorders        | 20,889(1.8)   | 11,859(2.7)   | 8,718(2.8)    | 7,097(3.3)    | 911(3.9)     | 6,173(1.8)    | 7,989(1.9)    | 7,130(2.7)    | 5,496(2.3)    | 4,390(1.2)    |
| Epilepsy                                           | 19,882(1.7)   | 10,315(2.4)   | 7,476(2.4)    | 6,039(2.8)    | 700(3.0)     | 5,922(1.7)    | 7,690(1.9)    | 6,218(2.4)    | 5,063(2.1)    | 4,263(1.2)    |
| Cystic Fibrosis and Metabolic Disorders            | 12,209(1.0)   | 6,270(1.4)    | 4,671(1.5)    | 3,448(1.6)    | 445(1.9)     | 4,394(1.3)    | 5,473(1.3)    | 3,738(1.4)    | 3,370(1.4)    | 2,196(0.6)    |
| Fibromyalgia, Chronic Pain and Fatigue             | 210,878(17.8) | 111,190(25.4) | 81,838(26.0)  | 61,637(28.4)  | 7,420(32.0)  | 78,553(23.0)  | 99,990(24.2)  | 68,291(26.3)  | 62,553(25.7)  | 34,163(9.5)   |
| Viral Hepatitis (general)                          | 14,494(1.2)   | 6,408(1.5)    | 4,462(1.4)    | 3,602(1.7)    | 443(1.9)     | 4,281(1.3)    | 5,155(1.2)    | 3,715(1.4)    | 3,326(1.4)    | 3,780(1.1)    |
| Liver Disease Cirrhosis and other liver conditions | 78,506(6.6)   | 43,855(10.0)  | 32,340(10.3)  | 24,720(11.4)  | 3,136(13.5)  | 27,186(8.0)   | 34,311(8.3)   | 24,344(9.4)   | 22,635(9.3)   | 13,593(3.8)   |
| Leukemias and Lymphomas                            | 17,825(1.5)   | 10,263(2.3)   | 6,948(2.2)    | 6,633(3.1)    | 882(3.8)     | 6,154(1.8)    | 8,393(2.0)    | 5,665(2.2)    | 5,745(2.4)    | 2,799(0.8)    |
| Migraine and other chronic headache                | 40,625(3.4)   | 21,449(4.9)   | 16,251(5.2)   | 11,461(5.3)   | 1,485(6.4)   | 15,458(4.5)   | 20,000(4.8)   | 12,746(4.9)   | 12,337(5.1)   | 6,453(1.8)    |
| Mobility Impairments                               | 25,125(2.1)   | 13,568(3.1)   | 9,989(3.2)    | 7,900(3.6)    | 926(4.0)     | 7,313(2.1)    | 9,063(2.2)    | 8,158(3.1)    | 6,350(2.6)    | 5,596(1.6)    |
| Obesity                                            | 227,801(19.2) | 108,503(24.8) | 78,347(24.9)  | 58,906(27.2)  | 6,536(28.2)  | 79,851(23.4)  | 96,219(23.3)  | 68,680(26.4)  | 61,392(25.2)  | 45,069(12.6)  |
| Peripheral Vascular Disease                        | 112,814(9.5)  | 62,250(14.2)  | 44,377(14.1)  | 37,004(17.1)  | 4,875(21.0)  | 39,571(11.6)  | 50,623(12.3)  | 39,277(15.1)  | 33,794(13.9)  | 18,709(5.2)   |
| Tobacco Use Disorders                              | 124,413(10.5) | 61,579(14.0)  | 39,941(12.7)  | 38,193(17.6)  | 4,862(21.0)  | 37,089(10.9)  | 52,063(12.6)  | 34,177(13.2)  | 32,020(13.2)  | 27,318(7.6)   |
| Pressure Ulcers and Chronic Ulcers                 | 39,536(3.3)   | 24,923(5.7)   | 18,268(5.8)   | 15,406(7.1)   | 1,988(8.6)   | 12,855(3.8)   | 15,975(3.9)   | 18,878(7.3)   | 14,319(5.9)   | 5,172(1.4)    |
| Deafness and Hearing Impairment                    | 73,788(6.2)   | 37,425(8.5)   | 27,525(8.7)   | 20,022(9.2)   | 2,633(11.3)  | 28,696(8.4)   | 34,931(8.5)   | 22,986(8.9)   | 23,349(9.6)   | 11,975(3.3)   |

Note. Data are presented as No. (%) of patients unless otherwise noted.

Abbreviations: FLQ, fluoroquinolone; CIP, ciprofloxacin; LVX, levofloxacin; MXF, moxifloxacin; AMX, Amoxicillin; AMC, Amoxicillin Clavulanate; AZT, Azithromycin; LEX, Cephalexin; IQR, interquartile range.

**Table 2. Hazard Ratios of Tendon Rupture for Each Covariate**

| VARIABLE                               | REFERENCE                  | HR(95% CI)      |
|----------------------------------------|----------------------------|-----------------|
| Female                                 | Male                       | 0.71(0.70,0.72) |
| Black                                  |                            | 0.76(0.74,0.78) |
| Hispanic                               | White                      | 0.91(0.88,0.94) |
| Asian                                  |                            | 0.68(0.64,0.72) |
| Other                                  |                            | 1.03(0.99,1.07) |
| Dual ever                              | Non-dual non-LIS           | 0.67(0.65,0.69) |
| Non-dual LIS                           |                            | 0.69(0.66,0.72) |
| Living in rural area                   | No                         | 0.93(0.92,0.95) |
| Medicare part d since 2008             |                            | 1.04(1.00,1.07) |
| Medicare part d since 2009             |                            | 1.13(1.09,1.17) |
| Medicare part d since 2010             |                            | 1.19(1.15,1.23) |
| Medicare part d since 2011             |                            | 1.23(1.19,1.27) |
| Medicare part d since 2012             | Medicare part D since 2007 | 1.19(1.15,1.23) |
| Medicare part d since 2013             |                            | 1.13(1.09,1.17) |
| Medicare part d since 2013             |                            | 1.17(1.13,1.22) |
| Medicare part d since 2015             |                            | 1.08(1.03,1.12) |
| Medicare part d since 2016             |                            | 1.29(0.47,3.55) |
| AMI                                    | No                         | 0.76(0.71,0.81) |
| Atrial Fibrillation                    | No                         | 0.93(0.91,0.96) |
| Cataract                               | No                         | 1.24(1.22,1.25) |
| Chronic Kidney Disease                 | No                         | 0.91(0.89,0.93) |
| COPD                                   | No                         | 0.86(0.83,0.88) |
| Heart Failure                          | No                         | 0.78(0.76,0.81) |
| Diabetes                               | No                         | 0.98(0.96,0.99) |
| Glaucoma                               | No                         | 1.11(1.09,1.13) |
| Hip/Pelvic Fracture                    | No                         | 0.76(0.69,0.85) |
| Ischemic Heart Disease                 | No                         | 1.11(1.09,1.12) |
| Depression                             | No                         | 1.17(1.14,1.21) |
| Alzheimer's Disease or Senile Dementia | No                         | 0.69(0.65,0.72) |
| Osteoporosis                           | No                         | 1.04(1.02,1.06) |
| Rheumatoid Arthritis/Osteoarthritis    | No                         | 2.83(2.79,2.88) |
| Stroke/Transient Ischemic Attack       | No                         | 0.96(0.93,1.00) |
| Breast Cancer                          | No                         | 0.94(0.91,0.97) |
| Colorectal Cancer                      | No                         | 0.77(0.72,0.83) |
| Prostate Cancer                        | No                         | 1.01(0.97,1.04) |
| Lung Cancer                            | No                         | 0.39(0.35,0.44) |
| Endometrial Cancer                     | No                         | 0.85(0.77,0.94) |
| Anemia                                 | No                         | 1.01(0.99,1.03) |



|    |                                                           |    |                 |
|----|-----------------------------------------------------------|----|-----------------|
| 1  | <b>Asthma</b>                                             | No | 1.24(1.21,1.27) |
| 2  | <b>Hyperlipidemia</b>                                     | No | 1.36(1.34,1.38) |
| 3  | <b>Hyperplasia</b>                                        | No | 1.14(1.11,1.16) |
| 4  | <b>Hypertension</b>                                       | No | 1.10(1.09,1.12) |
| 5  | <b>Hypothyroidism</b>                                     | No | 1.08(1.06,1.10) |
| 6  | <b>Anxiety Disorders</b>                                  | No | 0.98(0.96,1.00) |
| 7  | <b>Bipolar Disorder</b>                                   | No | 1.02(0.96,1.08) |
| 8  | <b>Major Depressive Affective Disorder</b>                | No | 1.03(1.00,1.07) |
| 9  | <b>Schizophrenia and Other Psychotic Disorders</b>        | No | 0.66(0.61,0.72) |
| 10 | <b>Epilepsy</b>                                           | No | 0.85(0.80,0.91) |
| 11 | <b>Fibromyalgia, Chronic Pain and Fatigue</b>             | No | 1.39(1.36,1.41) |
| 12 | <b>Viral hepatitis (general)</b>                          | No | 1.02(0.94,1.10) |
| 13 | <b>Liver Disease Cirrhosis and other liver conditions</b> | No | 0.94(0.91,0.97) |
| 14 | <b>Leukemias and Lymphomas</b>                            | No | 0.94(0.88,1.00) |
| 15 | <b>Migraine and other chronic headache</b>                | No | 1.26(1.21,1.30) |
| 16 | <b>Mobility Impairments</b>                               | No | 0.69(0.64,0.74) |
| 17 | <b>Obesity</b>                                            | No | 1.06(1.04,1.08) |
| 18 | <b>Peripheral Vascular Disease</b>                        | No | 1.00(0.97,1.03) |
| 19 | <b>Tobacco Use Disorders</b>                              | No | 0.81(0.79,0.84) |
| 20 | <b>Pressure Ulcers and Chronic Ulcers</b>                 | No | 0.81(0.77,0.85) |
| 21 | <b>Deafness And Hearing Impairment</b>                    | No | 1.19(1.16,1.23) |

Abbreviations: HR, hazard ratio, CI, confidence interval; FLQ, fluoroquinolone; CIP, ciprofloxacin; LVX, levofloxacin; MXF, moxifloxacin; AMX, Amoxicillin; AMC, Amoxicillin Clavulanate; AZT, Azithromycin; LEX, Cephalexin.

**Table 3. Hazard Ratios of Each Antibiotic by Anatomic Sites and Temporal Order of Drug Exposure**

| VARIABLE             | REFERENCE | Any Tendon Rupture | Achilles Tendon Rupture | Complete Rupture of Rotator Cuff | Other Tendon Ruptures |
|----------------------|-----------|--------------------|-------------------------|----------------------------------|-----------------------|
|                      |           | HR(95% CI)         | HR(95% CI)              | HR(95% CI)                       | HR(95% CI)            |
| Use AMX ≤ 30 days    |           | 0.87(0.82,0.92)    | 0.92(0.66,1.29)         | 0.88(0.83,0.94)                  | 0.83(0.73,0.94)       |
| Use AMX 31 - 60 days | No AMX    | 0.92(0.86,0.98)    | 0.79(0.52,1.20)         | 0.92(0.86,0.99)                  | 0.96(0.83,1.10)       |
| Use AMX ≥ 61 days    |           | 1.00(0.99,1.02)    | 0.94(0.84,1.05)         | 1.02(1.00,1.04)                  | 0.97(0.93,1.01)       |
| Use AMC 0 - 30 days  |           | 0.97(0.90,1.04)    | 1.28(0.88,1.85)         | 0.93(0.86,1.01)                  | 1.11(0.95,1.29)       |
| Use AMC 31 - 60 days | No AMC    | 1.04(0.96,1.14)    | 1.44(0.95,2.19)         | 1.03(0.94,1.13)                  | 1.01(0.84,1.22)       |
| Use AMC ≥ 61 days    |           | 1.06(1.04,1.08)    | 0.90(0.79,1.03)         | 1.07(1.04,1.09)                  | 1.02(0.97,1.07)       |
| Use AZM ≤ 30 days    |           | 1.02(0.97,1.08)    | 1.03(0.76,1.41)         | 1.03(0.97,1.09)                  | 1.01(0.89,1.13)       |
| Use AZM 31 - 60 days | No AZM    | 0.94(0.88,1.00)    | 0.91(0.63,1.31)         | 0.94(0.88,1.01)                  | 0.97(0.85,1.11)       |
| Use AZM ≥ 61 days    |           | 1.07(1.06,1.09)    | 1.05(0.95,1.16)         | 1.09(1.07,1.11)                  | 1.01(0.98,1.05)       |
| Use LEX ≤ 30 days    |           | 1.26(1.18,1.34)    | 2.14(1.61,2.85)         | 1.16(1.08,1.25)                  | 1.67(1.48,1.88)       |
| Use LEX 31 - 60 days | No LEX    | 1.09(1.01,1.18)    | 1.09(0.68,1.76)         | 1.09(1.00,1.19)                  | 1.09(0.92,1.30)       |
| Use LEX ≥ 61 days    |           | 1.09(1.07,1.12)    | 1.07(0.94,1.21)         | 1.09(1.07,1.11)                  | 1.15(1.10,1.20)       |
| Use LVX ≤ 30 days    |           | 1.15(1.07,1.23)    | 2.12(1.54,2.91)         | 1.16(1.07,1.26)                  | 1.02(0.87,1.21)       |
| Use LVX 31 - 60 days | No LVX    | 1.06(0.97,1.16)    | 2.12(1.46,3.09)         | 1.07(0.97,1.17)                  | 0.97(0.80,1.19)       |
| Use LVX ≥ 61 days    |           | 1.00(0.97,1.02)    | 1.11(0.97,1.27)         | 1.01(0.99,1.04)                  | 0.95(0.90,1.00)       |
| Use CIP ≤ 30 days    |           | 0.94(0.88,1.00)    | 0.88(0.61,1.28)         | 0.95(0.89,1.01)                  | 0.83(0.72,0.95)       |
| Use CIP 31 - 60 days | No CIP    | 0.95(0.89,1.02)    | 0.92(0.60,1.41)         | 0.95(0.88,1.03)                  | 0.93(0.79,1.08)       |
| Use CIP ≥ 61 days    |           | 0.96(0.94,0.98)    | 1.08(0.96,1.20)         | 0.97(0.95,0.99)                  | 0.90(0.87,0.94)       |
| Use MXF ≤ 30 days    |           | 0.69(0.49,0.97)    | 0.61(0.10,3.90)         | 0.55(0.36,0.85)                  | 1.07(0.61,1.86)       |
| Use MXF 31 - 60 days | No MXF    | 0.69(0.46,1.02)    | 0.00(0.00,0.00)         | 0.74(0.48,1.14)                  | 0.44(0.16,1.21)       |
| Use MXF ≥ 61 days    |           | 1.00(0.95,1.05)    | 1.18(0.89,1.56)         | 0.99(0.93,1.05)                  | 1.12(1.00,1.24)       |

Abbreviations: HR, hazard ratio, CI, confidence interval; FLQ, fluoroquinolone; CIP, ciprofloxacin; LVX, levofloxacin; MXF, moxifloxacin; AMX, Amoxicillin; AMC, Amoxicillin Clavulanate; AZT, Azithromycin; LEX, Cephalexin.

**Table 4. Pairwise Comparisons**

| COMPARISON  | LEVEL | Any Tendon Rupture<br>HR(95% CI) | Achilles Tendon Rupture<br>HR(95% CI) | Complete Rupture Of Rotator Cuff<br>HR(95% CI) | Other Tendon Rupture<br>HR(95% CI) |
|-------------|-------|----------------------------------|---------------------------------------|------------------------------------------------|------------------------------------|
| CIP VS. LVX | ≤ 30  | 0.82(0.74,0.90)                  | 0.42(0.25,0.69)                       | 0.81(0.73,0.90)                                | 0.81(0.65,1.01)                    |
| CIP VS. MXF | ≤ 30  | 1.36(0.96,1.92)                  | 1.45(0.22,9.66)                       | 1.71(1.11,2.64)                                | 0.78(0.44,1.38)                    |
| LVX VS. MXF | ≤ 30  | 1.66(1.18,2.35)                  | 3.48(0.53,22.97)                      | 2.10(1.36,3.24)                                | 0.96(0.53,1.71)                    |
| CIP VS. AMX | ≤ 30  | 1.08(0.99,1.17)                  | 0.96(0.58,1.59)                       | 1.08(0.98,1.18)                                | 1.00(0.82,1.21)                    |
| CIP VS. AZM | ≤ 30  | 0.92(0.85,1.00)                  | 0.86(0.53,1.37)                       | 0.92(0.84,1.01)                                | 0.82(0.68,0.99)                    |
| CIP VS. LEX | ≤ 30  | 0.74(0.68,0.81)                  | 0.41(0.26,0.66)                       | 0.82(0.74,0.90)                                | 0.50(0.41,0.60)                    |
| CIP VS. AMC | ≤ 30  | 0.97(0.88,1.07)                  | 0.69(0.41,1.17)                       | 1.02(0.91,1.13)                                | 0.75(0.61,0.92)                    |
| LVX VS. AMX | ≤ 30  | 1.32(1.20,1.45)                  | 2.29(1.44,3.64)                       | 1.32(1.19,1.46)                                | 1.23(0.99,1.52)                    |
| LVX VS. AZM | ≤ 30  | 1.13(1.03,1.23)                  | 2.05(1.32,3.19)                       | 1.13(1.02,1.25)                                | 1.01(0.82,1.25)                    |
| LVX VS. LEX | ≤ 30  | 0.91(0.83,1.00)                  | 0.99(0.64,1.53)                       | 1.00(0.90,1.12)                                | 0.61(0.50,0.75)                    |
| LVX VS. AMC | ≤ 30  | 1.19(1.07,1.32)                  | 1.66(1.02,2.69)                       | 1.25(1.11,1.40)                                | 0.92(0.74,1.15)                    |
| MXF VS. AMX | ≤ 30  | 0.79(0.56,1.12)                  | 0.66(0.10,4.35)                       | 0.63(0.41,0.97)                                | 1.29(0.73,2.28)                    |
| MXF VS. AZM | ≤ 30  | 0.68(0.48,0.95)                  | 0.59(0.09,3.90)                       | 0.54(0.35,0.83)                                | 1.06(0.60,1.87)                    |
| MXF VS. LEX | ≤ 30  | 0.55(0.39,0.77)                  | 0.28(0.04,1.86)                       | 0.48(0.31,0.73)                                | 0.64(0.36,1.13)                    |
| MXF VS. AMC | ≤ 30  | 0.71(0.51,1.01)                  | 0.48(0.07,3.19)                       | 0.59(0.38,0.92)                                | 0.96(0.54,1.72)                    |
| FLQ VS. AMX | ≤ 30  | 1.04(0.91,1.18)                  | 1.13(0.55,2.33)                       | 0.96(0.82,1.13)                                | 1.16(0.92,1.48)                    |
| FLQ VS. AZM | ≤ 30  | 0.89(0.78,1.01)                  | 1.01(0.50,2.06)                       | 0.83(0.70,0.97)                                | 0.96(0.76,1.21)                    |
| FLQ VS. LEX | ≤ 30  | 0.72(0.63,0.82)                  | 0.49(0.24,0.98)                       | 0.73(0.62,0.86)                                | 0.58(0.46,0.73)                    |
| FLQ VS. AMC | ≤ 30  | 0.94(0.82,1.08)                  | 0.82(0.39,1.72)                       | 0.91(0.77,1.08)                                | 0.87(0.68,1.12)                    |

Abbreviations: HR, hazard ratio, CI, confidence interval; FLQ, fluoroquinolone; CIP, ciprofloxacin; LVX, levofloxacin; MXF, moxifloxacin; AMX, Amoxicillin; AMC, Amoxicillin Clavulanate; AZT, Azithromycin; LEX, Cephalexin.

1  
2  
3  
4  
5  
6  
7  
8  
9  
10  
11  
12  
13  
14  
15  
16  
17  
18  
19  
20  
21  
22  
23  
24  
25  
26  
27  
28  
29  
30  
31  
32  
33  
34  
35  
36  
37  
38  
39  
40  
41  
42  
43  
44  
45  
46  
47  
48  
49  
50  
51  
52  
53  
54  
55  
56  
57  
58  
59  
60

For peer review only

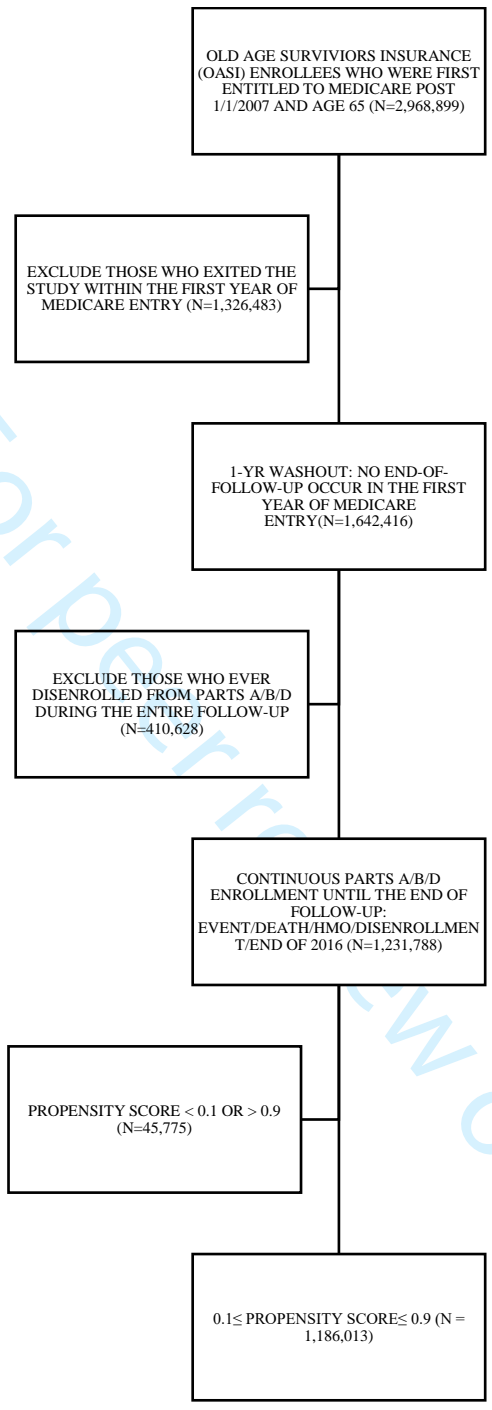

Supplementary Figure. Trend in Study Antibiotic Use

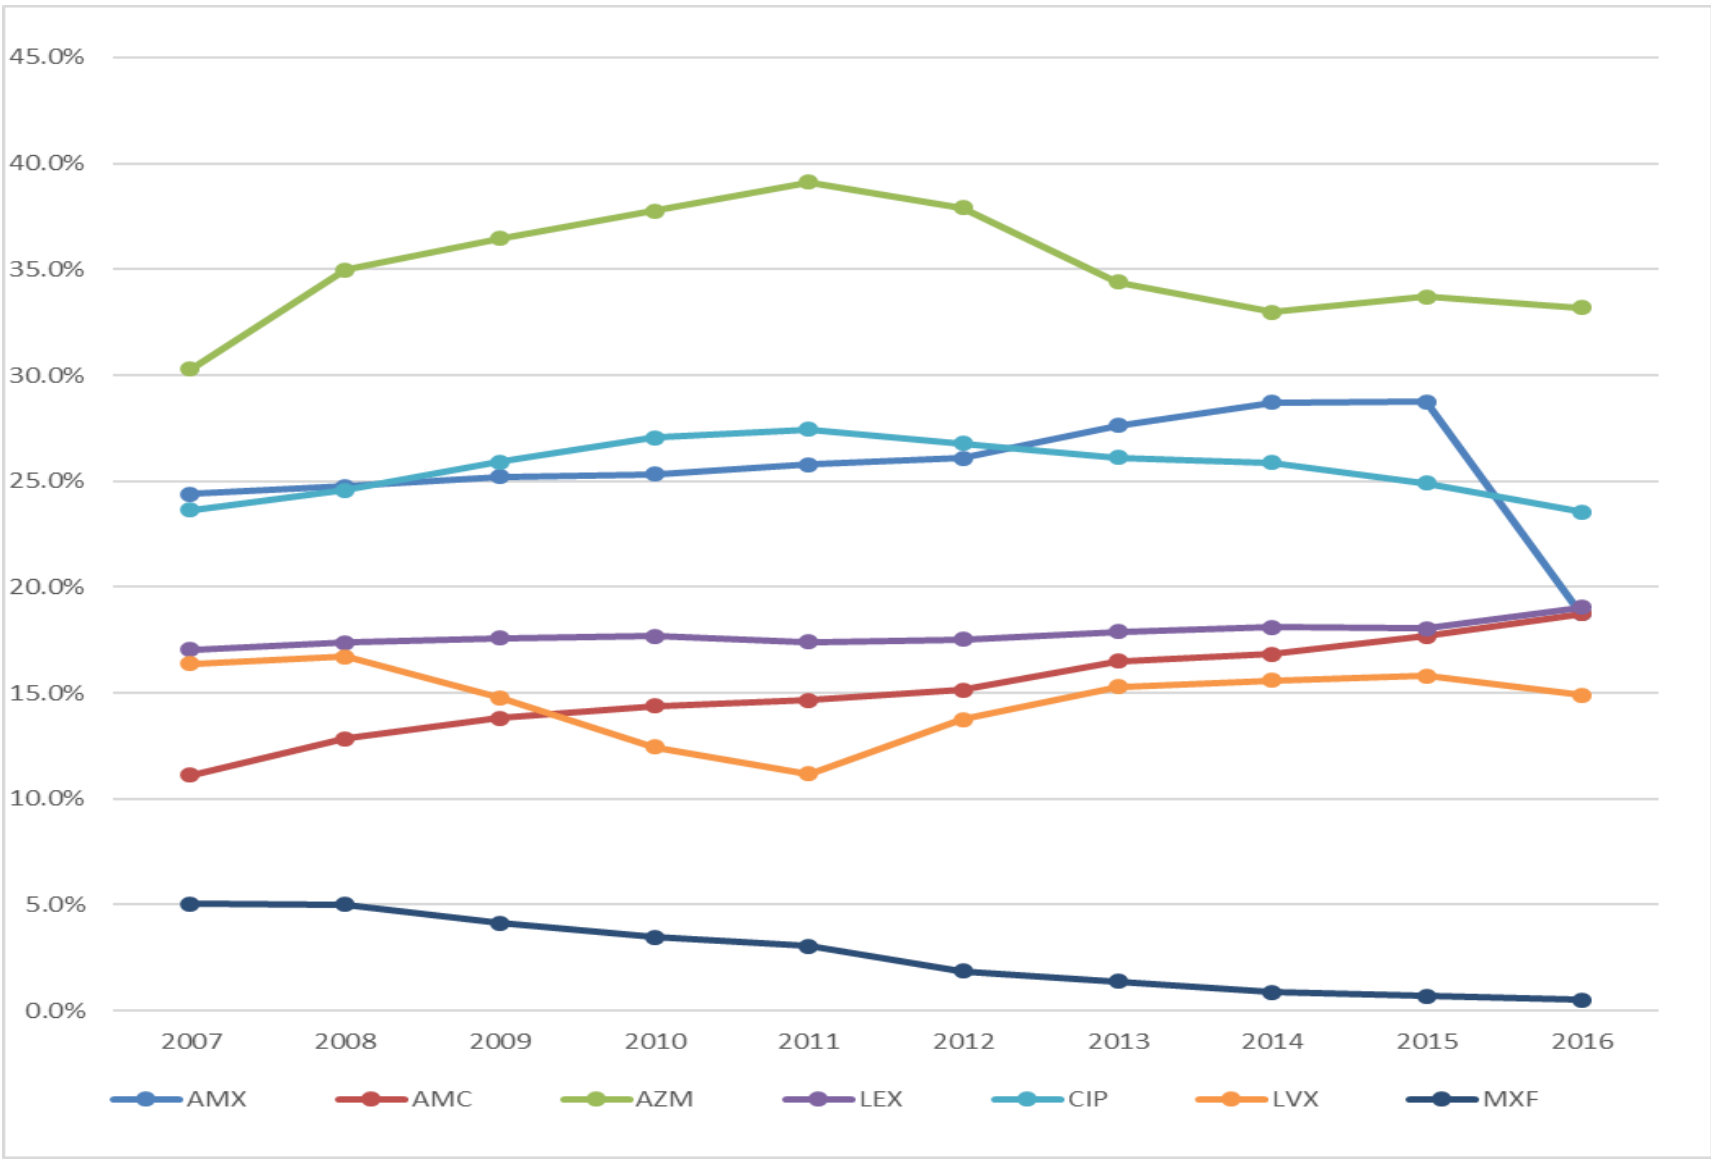

STROBE Statement—Checklist of items that should be included in reports of *case-control studies*

|                              | Item No | Recommendation                                                                                                                                                                                    | Page No |
|------------------------------|---------|---------------------------------------------------------------------------------------------------------------------------------------------------------------------------------------------------|---------|
| <b>Title and abstract</b>    | 1       | (a) Indicate the study's design with a commonly used term in the title or the abstract                                                                                                            | 1       |
|                              |         | (b) Provide in the abstract an informative and balanced summary of what was done and what was found                                                                                               | 2       |
| <b>Introduction</b>          |         |                                                                                                                                                                                                   |         |
| Background/rationale         | 2       | Explain the scientific background and rationale for the investigation being reported                                                                                                              | 5       |
| Objectives                   | 3       | State specific objectives, including any prespecified hypotheses                                                                                                                                  | 5       |
| <b>Methods</b>               |         |                                                                                                                                                                                                   |         |
| Study design                 | 4       | Present key elements of study design early in the paper                                                                                                                                           | 6       |
| Setting                      | 5       | Describe the setting, locations, and relevant dates, including periods of recruitment, exposure, follow-up, and data collection                                                                   | 6       |
| Participants                 | 6       | (a) Give the eligibility criteria, and the sources and methods of case ascertainment and control selection. Give the rationale for the choice of cases and controls                               | 6       |
|                              |         | (b) For matched studies, give matching criteria and the number of controls per case                                                                                                               |         |
| Variables                    | 7       | Clearly define all outcomes, exposures, predictors, potential confounders, and effect modifiers. Give diagnostic criteria, if applicable                                                          | 7       |
| Data sources/<br>measurement | 8*      | For each variable of interest, give sources of data and details of methods of assessment (measurement). Describe comparability of assessment methods if there is more than one group              | 7       |
| Bias                         | 9       | Describe any efforts to address potential sources of bias                                                                                                                                         | 8-9     |
| Study size                   | 10      | Explain how the study size was arrived at                                                                                                                                                         | 6       |
| Quantitative variables       | 11      | Explain how quantitative variables were handled in the analyses. If applicable, describe which groupings were chosen and why                                                                      | 8       |
| Statistical methods          | 12      | (a) Describe all statistical methods, including those used to control for confounding                                                                                                             | 7-9     |
|                              |         | (b) Describe any methods used to examine subgroups and interactions                                                                                                                               | n/a     |
|                              |         | (c) Explain how missing data were addressed                                                                                                                                                       | n/a     |
|                              |         | (d) If applicable, explain how matching of cases and controls was addressed                                                                                                                       | n/a     |
|                              |         | (e) Describe any sensitivity analyses                                                                                                                                                             | n/a     |
| <b>Results</b>               |         |                                                                                                                                                                                                   |         |
| Participants                 | 13*     | (a) Report numbers of individuals at each stage of study—eg numbers potentially eligible, examined for eligibility, confirmed eligible, included in the study, completing follow-up, and analysed | 9       |
|                              |         | (b) Give reasons for non-participation at each stage                                                                                                                                              | 9       |
|                              |         | (c) Consider use of a flow diagram                                                                                                                                                                | 9       |
| Descriptive data             | 14*     | (a) Give characteristics of study participants (eg demographic, clinical, social) and information on exposures and potential confounders                                                          | 9-10    |
|                              |         | (b) Indicate number of participants with missing data for each variable of interest                                                                                                               | n/a     |
| Outcome data                 | 15*     | Report numbers in each exposure category, or summary measures of exposure                                                                                                                         | 10      |

|    |                          |    |                                                                                                                                                                                                              |
|----|--------------------------|----|--------------------------------------------------------------------------------------------------------------------------------------------------------------------------------------------------------------|
| 1  |                          |    |                                                                                                                                                                                                              |
| 2  |                          |    |                                                                                                                                                                                                              |
| 3  | Main results             | 16 | (a) Give unadjusted estimates and, if applicable, confounder-adjusted estimates and their precision (eg, 95% confidence interval). Make clear which confounders were adjusted for and why they were included |
| 4  |                          |    | 11-14                                                                                                                                                                                                        |
| 5  |                          |    |                                                                                                                                                                                                              |
| 6  |                          |    |                                                                                                                                                                                                              |
| 7  |                          |    |                                                                                                                                                                                                              |
| 8  |                          |    |                                                                                                                                                                                                              |
| 9  |                          |    |                                                                                                                                                                                                              |
| 10 |                          |    |                                                                                                                                                                                                              |
| 11 |                          |    |                                                                                                                                                                                                              |
| 12 | Other analyses           | 17 | Report other analyses done—eg analyses of subgroups and interactions, and sensitivity analyses                                                                                                               |
| 13 |                          |    |                                                                                                                                                                                                              |
| 14 |                          |    |                                                                                                                                                                                                              |
| 15 |                          |    |                                                                                                                                                                                                              |
| 16 | <b>Discussion</b>        |    |                                                                                                                                                                                                              |
| 17 | Key results              | 18 | Summarise key results with reference to study objectives                                                                                                                                                     |
| 18 |                          |    | 14                                                                                                                                                                                                           |
| 19 | Limitations              | 19 | Discuss limitations of the study, taking into account sources of potential bias or imprecision. Discuss both direction and magnitude of any potential bias                                                   |
| 20 |                          |    | 14-17                                                                                                                                                                                                        |
| 21 | Interpretation           | 20 | Give a cautious overall interpretation of results considering objectives, limitations, multiplicity of analyses, results from similar studies, and other relevant evidence                                   |
| 22 |                          |    | 14-17                                                                                                                                                                                                        |
| 23 | Generalisability         | 21 | Discuss the generalisability (external validity) of the study results                                                                                                                                        |
| 24 |                          |    | 16                                                                                                                                                                                                           |
| 25 | <b>Other information</b> |    |                                                                                                                                                                                                              |
| 26 | Funding                  | 22 | Give the source of funding and the role of the funders for the present study and, if applicable, for the original study on which the present article is based                                                |
| 27 |                          |    | 18                                                                                                                                                                                                           |
| 28 |                          |    |                                                                                                                                                                                                              |

\*Give information separately for cases and controls.

**Note:** An Explanation and Elaboration article discusses each checklist item and gives methodological background and published examples of transparent reporting. The STROBE checklist is best used in conjunction with this article (freely available on the Web sites of PLoS Medicine at <http://www.plosmedicine.org/>, Annals of Internal Medicine at <http://www.annals.org/>, and Epidemiology at <http://www.epidem.com/>). Information on the STROBE Initiative is available at <http://www.strobe-statement.org>.

# BMJ Open

## The association between Tendon Ruptures and Use of Fluoroquinolone, and other oral antibiotics: A 10-year Prospective Study of 1 million U.S. senior Medicare beneficiaries

|                                 |                                                                                                                                                                                 |
|---------------------------------|---------------------------------------------------------------------------------------------------------------------------------------------------------------------------------|
| Journal:                        | <i>BMJ Open</i>                                                                                                                                                                 |
| Manuscript ID                   | bmjopen-2019-034844.R1                                                                                                                                                          |
| Article Type:                   | Original research                                                                                                                                                               |
| Date Submitted by the Author:   | 20-Jan-2020                                                                                                                                                                     |
| Complete List of Authors:       | Baik, Seo; National Library of Medicine, Lau, Jason; National Library of Medicine Huser, Vojtech ; National Library of Medicine McDonald, Clement; National Library of Medicine |
| <b>Primary Subject Heading</b>: | Epidemiology                                                                                                                                                                    |
| Secondary Subject Heading:      | General practice / Family practice, Pharmacology and therapeutics                                                                                                               |
| Keywords:                       | CLINICAL PHARMACOLOGY, EPIDEMIOLOGY, ORAL MEDICINE, Musculoskeletal disorders < ORTHOPAEDIC & TRAUMA SURGERY, ACCIDENT & EMERGENCY MEDICINE                                     |
|                                 |                                                                                                                                                                                 |

SCHOLARONE™  
Manuscripts





I, the Submitting Author has the right to grant and does grant on behalf of all authors of the Work (as defined in the below author licence), an exclusive licence and/or a non-exclusive licence for contributions from authors who are: i) UK Crown employees; ii) where BMJ has agreed a CC-BY licence shall apply, and/or iii) in accordance with the terms applicable for US Federal Government officers or employees acting as part of their official duties; on a worldwide, perpetual, irrevocable, royalty-free basis to BMJ Publishing Group Ltd ("BMJ") its licensees and where the relevant Journal is co-owned by BMJ to the co-owners of the Journal, to publish the Work in this journal and any other BMJ products and to exploit all rights, as set out in our [licence](#).

The Submitting Author accepts and understands that any supply made under these terms is made by BMJ to the Submitting Author unless you are acting as an employee on behalf of your employer or a postgraduate student of an affiliated institution which is paying any applicable article publishing charge ("APC") for Open Access articles. Where the Submitting Author wishes to make the Work available on an Open Access basis (and intends to pay the relevant APC), the terms of reuse of such Open Access shall be governed by a Creative Commons licence – details of these licences and which [Creative Commons](#) licence will apply to this Work are set out in our licence referred to above.

Other than as permitted in any relevant BMJ Author's Self Archiving Policies, I confirm this Work has not been accepted for publication elsewhere, is not being considered for publication elsewhere and does not duplicate material already published. I confirm all authors consent to publication of this Work and authorise the granting of this licence.

1  
2  
3  
4 **The association between Tendon Ruptures and Use of Fluoroquinolone, and other oral**  
5 **antibiotics: A 10-year Prospective Study of 1 million U.S. senior Medicare beneficiaries**  
6  
7  
8  
9

10  
11 **Seo Baik<sup>1</sup>, PhD, Jason J. Lau<sup>2</sup>, MD, Vojtech Huser<sup>1</sup>, MD, PhD, Clement J. McDonald<sup>1</sup>, MD**  
12  
13

14  
15  
16 Author Affiliations

- 17  
18 1. Lister Hill National Center for Biomedical Communications, National Library of  
19  
20 Medicine, U.S. National Institutes of Health, Bethesda, Maryland, USA (Drs. Baik,  
21  
22 Huser and McDonald)  
23  
24  
25 2. Department of Pediatric, UC Davis Health, Sacramento, California (Dr. Lau)  
26  
27  
28  
29

30 Address reprint request to Dr. McDonald (corresponding author) at Lister Hill National Center  
31  
32 for Biomedical Communications, National Library of Medicine, U.S. National Institutes of  
33  
34 Health, 8600 Rockville Pike, Building 38A, Room 07N710, Bethesda, Maryland 20894, USA  
35

36 Telephone: +1 (301) 496-4441

37  
38 E-mail: ClemMcDonald@mail.nih.gov  
39  
40  
41  
42  
43  
44  
45

46 **3609 Words (4000 MAX)**  
47  
48  
49  
50  
51  
52  
53  
54  
55  
56  
57

1  
2  
3 **Abstract (Max 300 words, 286 now)**  
4

5 **Objectives:** To assess the association of fluoroquinolone use with tendon ruptures  
6 compared to no fluoroquinolone and that of the four most commonly prescribed non-  
7 fluoroquinolone antibiotics in the US.  
8  
9  
10  
11  
12  
13

14 **Design:** Prospective observational study.  
15

16 **Setting:** U.S. senior enrolled in the federal old-age, survivor's insurance program.  
17

18 **Participants:** 1,009,925 Medicare fee-for-service beneficiaries and their inpatient,  
19 outpatient, prescription drug records were used.  
20  
21  
22

23 **Interventions:** Seven oral antibiotics, fluoroquinolones (ciprofloxacin, levofloxacin,  
24 moxifloxacin) and amoxicillin, amoxicillin-clavulanate, azithromycin and cephalexin.  
25  
26  
27

28 **Primary and Secondary Outcome measures:** All tendon ruptures combined, and three  
29 types of tendon ruptures by anatomic site, Achilles tendon rupture, rupture of rotator cuff  
30 and tendon ruptures on other anatomic sites.  
31  
32  
33

34 **Results:** Of three fluoroquinolones, only levofloxacin exhibited a significant increased  
35 risk of tendon ruptures - 16%, and 120% for rotator cuff and Achilles tendon rupture  
36 respectively in the  $\leq 30$  day window. Ciprofloxacin and moxifloxacin exhibited little to no  
37 increased risk of tendon ruptures. Notably, the risk of levofloxacin never exceeded the  
38 risk of the non-fluoroquinolone, cephalexin in any comparison.  
39  
40  
41  
42  
43  
44  
45

46  
47 Among the non-fluoroquinolone antibiotics, amoxicillin, amoxicillin-clavulanate, and  
48 azithromycin exhibited none to benign risk of tendon rupture. Cephalexin exhibited  
49 modest to large *increased* risk of tendon rupture at  $\leq 30$  day window across all anatomic  
50 rupture sites.  
51  
52  
53  
54  
55  
56

1  
2  
3  
4  
5  
6  
7  
8  
9 **Conclusions:** In our study, fluoroquinolones as a class were not associated with the  
10 increased risk of tendon ruptures. Neither ciprofloxacin nor moxifloxacin exhibited any  
11 risk for tendon ruptures. Levofloxacin did exhibit significant increased risk. Cephalexin  
12 with no reported effect on metalloprotease activity had an equal or greater risk than  
13 levofloxacin; so we question whether metalloprotease activity has any relevance to  
14 observed associations with tendon rupture. Confounding by indication bias may be more  
15 relevant and should be given more consideration as explanation for significant  
16 associations in observational studies of tendon rupture.  
17  
18  
19  
20  
21  
22  
23  
24  
25  
26  
27  
28  
29  
30  
31  
32  
33  
34  
35  
36  
37  
38  
39  
40  
41  
42  
43  
44  
45  
46  
47  
48  
49  
50  
51  
52  
53  
54  
55  
56  
57  
58  
59  
60

### Strengths and limitations of this study

- We conducted a large (more than 1 million US senior subjects) prospective study of outpatient prescription drug records to assess the association between the use of fluoroquinolones and the occurrence of tendon ruptures compared to the most commonly used non-fluoroquinolone oral antibiotics.
- Our study included all oral fluoroquinolones (ciprofloxacin, levofloxacin, moxifloxacin) prescribed in the US and the four most commonly prescribed non-fluoroquinolone antibiotics: amoxicillin, amoxicillin-clavulanate, azithromycin and cephalexin as controls.
- In addition to reporting the risk of any tendon rupture, we also reported the risk of three types of tendon ruptures by anatomic site 1) Achilles tendon rupture, 2) rupture of rotator cuff and 3) tendon ruptures on other anatomic sites as separate outcomes.
- This study is possibly only applicable to U.S. senior, aged 65 or more, Medicare fee-for-service beneficiaries.
- We had no options to verify claims diagnoses via chart review.

## Introduction

Fluoroquinolones (FQ) are among the most widely prescribed antibiotics in the outpatient setting[1,2] due to their broad spectrum treatment of bacteria found in respiratory, urinary, joint, and skin infections. Several observational studies have reported the association between the use of FQs and tendinitis and tendon rupture (TR), especially of the Achilles tendon[3–12] and the U.S. Food and Drug Administration (FDA) issued black box warnings to FQ antibiotics beginning in 2008.[13] The warning was updated in 2016 to recommend using alternative antibiotics when possible.[14,15] The fact that FQs upregulate the production of metalloproteinase (MMP) enzymes with collagenase activity that could weaken tendons is taken as a mechanism to explain this reported risk.[16–18]

Studies that reported association between FQ use and TR used one or more other antibiotics as controls. One study compared the FQ rupture rates with patients using azithromycin, the most frequently used oral antibiotic in the US. Only two focused principally on TR risk among the elderly. None compared TR rates of *FQs* with those of cephalexin -- the 3rd most commonly prescribed oral antibiotic in the US.

The Virtual Research Data Center (VRDC) of Center for Medicare and Medicaid Services (CMS)[19] carries more than 10 years of Medicare claims, which include information about the usage of prescription drugs and encounter diagnoses (including tendon ruptures). It also carries information about 42 major chronic diseases, demographic characteristic and vital status. We conducted a large observational study using the VRDC to assess the association of FQ antibiotics with TR compared to that of

1  
2  
3 the four most commonly prescribed non-FQ antibiotics in the US. Here we report the  
4  
5 results of that analysis.  
6  
7  
8  
9

## 10 **Methods**

### 11 *Patient and public involvement*

12  
13  
14 Neither patients nor the public were not involved in the design of the study.  
15  
16  
17  
18

### 19 *Study population*

20  
21 We derived our study population from a 20% random sample of Medicare prescription  
22  
23 drug coverage (Part D) fee-for-service enrollees who first enrolled in the Medicare under  
24  
25 old age and survivors insurance within a month of age 65 (779-781 month-old) and on or  
26  
27 after 1/1/2007 - the first full year of Part D prescriptions availability. We included claim  
28  
29 data through 12/31/2016, the end of VRDC claim data available to us. All of the VRDC  
30  
31 data is de-identified and researchers must perform all of their analysis within the VRDC  
32  
33 computer systems, and can only pull statistical results from it.[19] We obtained approvals  
34  
35 for these studies from the CMS privacy board and NIH OHSRP as not human subject  
36  
37 studies.  
38  
39  
40  
41  
42  
43

44 We required subjects to be continuously enrolled in hospital insurance (Part A) and  
45  
46 medical insurance (Part B) to assure we had full outpatient and inpatient claims data,  
47  
48 which are not available for nearly 20% of patients with Part D only.[20] To obtain a  
49  
50 cohort of new TR patients, we excluded (washed out) individuals with TRs recorded in  
51  
52 the first year of their Medicare entitlement.[21] In order to assure sufficient follow-up,  
53  
54  
55  
56  
57  
58  
59  
60

1  
2  
3 we excluded patients with less than 1-year follow-up. Moreover, to obtain incident (or  
4  
5 new) drug user cohort, we excluded individuals who were prescribed any study  
6  
7 antibiotics during their first 3-month after Part D enrollment, while ignoring the data  
8  
9 during the same time window for patients not taking study antibiotics. By doing so, we  
10  
11 minimize survivor bias from a prevalent users (See Figure 1 Consort Diagram).  
12  
13  
14  
15

### 16 17 Primary Outcome

18  
19 We identified patients with TR based upon International Classification of Diseases  
20  
21 (ICD)-9-CM codes of 726.13, 727.60-727.69, and ICD-10-CM codes of M66.2, M66.3,  
22  
23 M66.8, M66.9, and M75.1. We combined all TRs and reported them as one outcome, and  
24  
25 report three types of TRs by anatomic site 1) Achilles tendon rupture, 2) rupture of  
26  
27 rotator cuff and 3) TRs on other anatomic sites as separate outcomes. We focused on  
28  
29 Achilles TR because it was the sole focus of many prior studies and on rotator cuff TR  
30  
31 because it is the predominant TR of the elderly. We lumped the remaining as “other  
32  
33 TRs”.  
34  
35  
36  
37  
38  
39

### 40 Study antibiotics

41  
42 As a study antibiotic, we included all three oral FQs prescribed in the US -- moxifloxacin  
43  
44 (MXF), ciprofloxacin (CIP), levofloxacin (LVX), which is the active stereoisomer of  
45  
46 ofloxacin. As controls, we also included the four most frequently prescribed non-FQ oral  
47  
48 antibiotics - amoxicillin (AMX), amoxicillin clavulanate (AMC), azithromycin (AZT)  
49  
50 and cephalexin (LEX). One of the FQs, and all four of the non-FQ, study antibiotics  
51  
52 constituted the five most frequently used U.S. oral antibiotics in 2011.  
53  
54  
55  
56  
57



### Statistical Analysis

We analyzed each of the four TR outcomes in separate Fine-Gray competing risk regression analyses with death as the competing risk.[22,23] Patients became eligible for “the study” at their Medicare enrollment but prescription data did not become available until their Part D enrollment. We followed them from their entry in Part D (while accounting for left truncation[24]) until their death, switch to a capitated plan, disenrollment from Medicare or 12/31/2016 – whichever came first. We adjusted hazard ratio (HR) of each study antibiotic for concurrent use of other study antibiotics and adjusted for calendar year of subject’s Part D entry, to account for secular trends. We also adjusted each HR for patient’s characteristics, income, gender, race, rural residency (Yes/No) and also for 42 chronic conditions from the Medicare Master Beneficiary Summary File (MBSF)[25] with >1% prevalence, as a measure of overall health. Based upon monthly indicators of dual-eligibility and Low Income Subsidy (LIS) status, we separated study individuals into three groups: 1) dual whose income is <135% Federal Poverty Line (FPL); 2) non-dual LIS whose income is between 135 and 150% FPL; and non-dual no LIS whose income is >150% FPL. We used this variable in the analysis as a surrogate for economic status.[26]

We assumed that patients were on a given kind of study drug from the prescription dispensing date to the end of days of supply. We did not distinguish between different brands of a study drugs. Following the approach of prior studies,[3–5] we separated subjects by temporal exposure within each study drug, including groups for never

1  
2  
3 exposed, exposed within 30 days, 31-60 days, and >60 days of the index (or TR event)  
4  
5 time. Thus, by this approach we could detect the presumed short term action of the FQ's  
6  
7 on tendons and avoid the risk of non-differential misclassification that can occur with too  
8  
9 simple (yes/no) drug exposure measures.[27] In order to minimize the immortal time  
10  
11 bias, we treated all drug usage measures and all patients characteristics, except gender,  
12  
13 race and rural residency, as time-varying covariates.[28,29] In order to mitigate selection  
14  
15 bias toward use of any study antibiotics, we employed a propensity score (PS)  
16  
17 approach.[30,31] We first derived a PS of taking any of study antibiotics as a function of  
18  
19 patient's characteristics at the date of the first antibiotic use after Part D entry from a  
20  
21 multiple logistic regression. We used the median days to the first study antibiotic use in  
22  
23 patients taking study antibiotics as the cutoff time for subjects not taking study  
24  
25 antibiotics. We performed our analyses with an inverse propensity score weight (IPSW)  
26  
27 excluding individuals with the PS below 0.1 and above 0.9, to mitigate poorer  
28  
29 performance in the presence of a strong treatment-selection process.[32] In post-hoc  
30  
31 analyses, we also compared the risk of TR of each study antibiotics to that of every other  
32  
33 study antibiotic on a pairwise basis.  
34  
35  
36  
37  
38  
39  
40  
41

## 42 **Results**

### 43 44 *Study population and Secular trend*

45  
46 From our 20% sample of Part D enrollees, 1,009,925 patients satisfied all our selection  
47  
48 criteria including the washout of individuals with any antibiotic use in their first 3-month  
49  
50 of Part D enrollment (Figure 1 Consort Diagram). Follow-up began with an individual's  
51  
52 enrollment in Part D program (median (IQR) 0 (0-122) days from the Medicare  
53  
54  
55  
56  
57  
58  
59  
60

entitlement). We followed them for a median of 3.6 years (total 4,030,897 patient-years) until their first diagnosis of TR (3.5%), death (4.6%), switch from fee-for-service to health maintenance organization (HMO) plans (12.6%), disenrollment from Medicare (<1%) or study end on 12/31/2016 (79.3%), whichever came first. Patients had their first post enrollment claim with a diagnosis of TR at a median age of 68.5 (IQR 67.2-70.4). The proportions of non-Hispanic White, female and rural residents were 80.7%, 57.0%, and 22.6% respectively. About a fifth of patients received federal/state subsidies, i.e. Medicaid coverage on top of Medicare (dual 16.1%) or assistance in paying their Part D premium and coinsurance/copayment (non-dual LIS 2.7%). Among the 42 Medicare chronic disease covariates, hypertension (67.3%), hyperlipidemia (68.4%), cataract (46.4%), rheumatoid arthritis/osteoarthritis (36.6%), anemia (30.4%), ischemic heart disease (26.2%), and chronic kidney disease (17.9%) were the seven most prevalent (Table 1).

Of the 328,654 (33.0%) study patients who took a FQ prescription, 71.5%, 47.5% and 4.5% ever took CIP, LVX and MXF respectively. Of 576,885 (57.1%) of patients who took a non-FQ antibiotic, the figures were 53.6%, 44.9%, 33.9% and 31.1% for AZM, AMX, LEX, and AMC, respectively. Patients who took one or more study antibiotics took a median (IQR) of 3.0 (1.0-6.0) study antibiotic prescriptions and took a median (IQR) 2.0 (1.0-3.0) different study antibiotics during the observation period. About 2.5% patients who took one or more study antibiotics took more than one antibiotics at the same time.

s

1  
2  
3 Secular trends in study antibiotics usage existed. MXF usage declined precipitously from  
4 5.0% in 2007 to almost zero in 2016 – overweighting the MXF statistics for early entrants  
5 into Medicare and yielding a longer mean follow up time. CIP use hit a peak, and LVX, a  
6 nadir, in 2011. The use of AMX, AMC and LEX trended slowly upward (Supplementary  
7 Figure 1). The mode (median) of supply durations for each antibiotics were 10 (7) for  
8 AMX, 10 (10) for AMC, 5 (5) for AZM, 10 (7) for LEX, 7 (7) for CIP, 10 (7) for LVX,  
9 10 (11) for MXF. About thirty five percent of patients were never exposed to any one of  
10 the study antibiotics during the study period.  
11  
12  
13  
14  
15  
16  
17  
18  
19  
20  
21  
22  
23

24 Unadjusted figures for TR prevalence across each of the seven study antibiotic users and  
25 the no study antibiotic users ranged from a high of 5.2% for MXF to a low of 2.9% for no  
26 antibiotic (Table 1). Except for MXF, the *unadjusted* prevalence of TRs associated with  
27 each non-FQ antibiotic was *greater than* or equal to that of each FQ antibiotic. The TR  
28 rates per 1000 patient-years followed the same pattern, with the non-FQ antibiotics  
29 topping the rates of all FQs except MXF (which had the highest rate), possibly due to  
30 overweighting of MXF usage in the early years of the study. The study subjects who ever  
31 took an FQ had the highest unadjusted rate of death per 1000 person-years. LVX's death  
32 rate was nearly twice the rate of each non-FQ antibiotics. The size of the associations  
33 with diseases like diabetes, chronic renal failure and heart failure paralleled the  
34 magnitude of the death rates and was generally higher with FQs than non-FQ antibiotics  
35 (Table 1).  
36  
37  
38  
39  
40  
41  
42  
43  
44  
45  
46  
47  
48  
49  
50  
51  
52  
53  
54  
55  
56  
57  
58  
59  
60

### Primary Analysis

Table 2 presents HRs for all covariates in our Fine-Gray competing risk regression with IPSW, for all anatomic types of tendon ruptures taken together. Being a female (vs. male), African-American, Hispanic, and Asian (vs. white), being Dual or non-Dual LIS (vs. non-Dual no LIS) and living in a rural area were all associated with a *reduced* risk of tendon rupture. These risk reductions were 24% or more for all but Hispanics and rural residency covariates, and the reductions were similar across all anatomic sites. In general, life threatening chronic disease, such as AMI, COPD, heart failure and colorectal/lung/endometrial cancers were associated with a lower risk of TR in a range of 15-60% below control possibly due to constrained physical activity and/or shortened life span. Notably, diabetes and chronic renal disease, previously reported as risk factors for TR,[33,34] exhibited no increased TR risk. Mobility impairments had reduced risk of TR similar to that of the severe life threatening diseases, likely due to reduced activity. Most diseases with low life threats such as cataract, glaucoma, depression, asthma, hyperlipidemia, hypertension, prostatic hyperplasia, migraine/other chronic headache, and deafness/hearing impairment exhibited risks of 8 to 34% *above* controls probably for reasons related to longer life spans and less inhibited activity. Ischemic heart did not fit the mold of sicker equals lower TR risk. Patients with rheumatoid arthritis/osteoarthritis were a special case and had TR risk of 184% *above* control possibly due to joint and associated tendon inflammation with these disorders. Fibromyalgia/chronic pain and fatigue also exhibited a 39% increased risk of TR possibly also due to an inflammatory component.

1  
2  
3 The Achilles tendon carries the full force of the extra weight carried by obese patients  
4 and obesity was associated with a significant (13%) increase in Achilles TR ruptures  
5 while its effect on other TR classes was significant but miniscule (2-3%) (Data not  
6 shown).  
7  
8  
9  
10  
11

### 12 13 ***Effect of antibiotics*** 14

15  
16 Table 3 shows the risk associated with each study antibiotic broken down by time lag  
17 between the antibiotic use and the TR reported in a claim as well as by anatomic sites. Of  
18 the total 34,880 patients with any TR occurrence, complete rupture of rotator cuff  
19 represented the major share (80.5%), followed by other TRs (16.9%) and Achilles TR  
20 (2.6%). In the survival analysis, we followed patients until the first occurrence of TR; so,  
21 these figures count only the first TR occurrence independent of anatomic site.  
22  
23  
24  
25  
26  
27  
28  
29

30  
31 Of the non-FQ antibiotics, AMX exhibited a reduced risk of TR compared to no AMX in  
32 every tendon class and time window, similar to its low risk in previous studies. It  
33 exhibited a significantly lower risk in the  $\leq 30$ -day window except for the Achilles  
34 tendon. AZM and AMC exhibited a similar benign risk in all time windows except for  
35 TR of rotator cuff in  $>60$ -day window  
36  
37  
38  
39  
40  
41  
42  
43

44 LEX was the surprise non-FQ antibiotic. It exhibited modest to large *increased* TR risk at  
45  $\leq 30$ -day window across all sites ranging from a low of 19% increase for complete rupture  
46 of rotator cuff to a high 93% increase for Achilles TR. Its risk was also significantly  
47 higher at  $\leq 30$ -day window for all TRs taken together.  
48  
49  
50  
51  
52  
53  
54  
55  
56  
57  
58  
59  
60

1  
2  
3 Of the FQs, CIP, the most frequently prescribed FQ, and MXF, the least frequently  
4 prescribed FQ, exhibited little to no increased risk of TR within each anatomic site and  
5  
6 prescribed FQ, exhibited little to no increased risk of TR within each anatomic site and  
7  
8 each time frame. LVX is the only FQ to exhibit a significant *increase* in TR risk - of  
9  
10 16%, and 120% for rupture of rotator cuff and Achilles TR respectively in the  $\leq 30$ -day  
11  
12 window. Notably, the risk of LVX never exceeded the risk of the non-FQ, LEX in any  
13  
14 comparison.  
15

16  
17  
18 In a post-hoc analysis (Table 4), we compared the TR risk of each antibiotic with every  
19  
20 other antibiotic (pairwise comparisons of FQ vs. FQ and FQ vs. non-FQ), for  $\leq 30$  day  
21  
22 window and FQs as a class vs. each non-FQ after combining the data from the three time  
23  
24 windows. These results paralleled the above-mentioned risk for each study antibiotic in  
25  
26 Table 3. Again, TR risk for LVX was greater than that of CIP, MXF, AMC, AMX, and  
27  
28 AZM in a  $\leq 30$  day window. However, LVX risk was comparable to that of LEX for  
29  
30 Achilles TR, and rupture of rotator cuff and significantly lower than LEX for the other  
31  
32 TR class. When comparing the risk of FQs as a class against that of non-FQ antibiotics,  
33  
34 most of the non-FQ antibiotics had significantly greater risk than the FQ class as a whole  
35  
36 across all TR sites (See last 5 rows of Table 4).  
37  
38  
39  
40  
41  
42  
43

## 44 **Discussion**

45  
46 Our results conflict with the common assertion that the Achilles tendon rupture is the  
47  
48 most common tendon rupture (up to 90% in one report[35]). In our elderly cohort,  
49  
50 Achilles TRs were a tiny, 2.6%, proportion of all TRs. Some of this difference may be  
51  
52 explained by the differences in demographics. Reports of high prevalence of Achilles TR  
53  
54 came from studies of young military populations.[36,37] In contrast, our data came from  
55  
56  
57

1  
2  
3 an elderly Medicare population. Some of the difference could also be due to less ability to  
4  
5 diagnose non-Achilles tendon ruptures until MRI joint imaging became widely available,  
6  
7 because such TRs are less amenable to diagnosis by physical exam.  
8  
9

10  
11  
12 Many authorities describe the relationship between FQs and TRs as a class “effect”.

13  
14 However, FQs as a class had no significant risk of TR compared with each of the three  
15  
16 non-FQ antibiotics in any time window. Further, neither MXF (n= 14,728 subjects) nor  
17  
18 CIP (n=234,994 subjects), the oral FQ with the greatest use and with a greater effect on  
19  
20 metalloproteases than other FQs,[38–40] had any TR risk at any anatomic site in any time  
21  
22 window. CIP’s lack of risk is consistent with two studies[5,9] in which CIP exhibited  
23  
24 zero risk or small risks compared to ofloxacin, a racemic mixture whose active ingredient  
25  
26 is the levo-isomer, LVX. We do see a strong association between LVX and TRs whether  
27  
28 we used no LVX or three of the non-FQ antibiotics as controls. However, with LEX, the  
29  
30 one cephalosporin, as comparator, this association disappears.  
31  
32  
33  
34  
35  
36  
37

38 One previous study described the effect of FQs on TR risk as small and unimportant.[10]  
39  
40 Two studies reported no effect of FQs on TR risk.[9,11] At least 7 previous observational  
41  
42 studies reported increased risks of TR after the use of FQ.[3–8,12] However, in all but  
43  
44 one study, the TR event rates were very low (between 5 and 111) among patients taking  
45  
46 an FQ. In comparison, our study included 12,517 (3.8%) such patients. One previous  
47  
48 study did report a large number of events, 23,000 (3.5%) patients with TRs while on FQs  
49  
50 and, like our study, it also focused exclusively on elderly patients.[3] However, it did not  
51  
52 compare FQ use against no FQ use (but against times when FQ’s were used and not used  
53  
54  
55  
56  
57  
58  
59  
60



1  
2  
3 in one patient population so they could not adjust for the different levels of clinical  
4 attention at visits requiring a systemic antibiotic vs visits that did not). Furthermore, they  
5 assessed the association between AMX and TRs in separate analysis and used the risk of  
6 TRs in that analysis as the comparator for the risk observed in the FQ analysis. But AMX  
7 treated patients are likely at much lower acuity level (per our data) introducing large  
8 possible differential biases into that comparison. Furthermore, their analysis did not  
9 include death as a competing risk as is recommend when death rates exceed event  
10 rates.[23] They reported no death rates, but death rates in their study likely exceeded their  
11 event rates given the similarity of their population with ours.  
12  
13  
14  
15  
16  
17  
18  
19  
20  
21  
22  
23  
24  
25

26 According to our data, the AMX treated patients had fewer comorbidities (as was also  
27 true in Daneman's study), almost 14% fewer hospitalizations and half of death rate per  
28 1000 patient-years, compared to patients taking LVX. So the two populations are not  
29 comparable. LVX appears to be reserved for more severe infections or more fragile  
30 patients and thus subject to differential biases.  
31  
32  
33  
34  
35  
36  
37  
38  
39

40 The reported activation of metalloprotease activity by FQs has underpinned the idea of a  
41 causal link between FQs and TRs. The argument goes as follows: FQs stimulate  
42 metalloproteases, which can break down collagen; the tendon is made of collagen; so FQs  
43 may cause TRs. However, our data disrupts this argument. CIP which strongly *stimulates*  
44 MMP activity,[17,18] exhibited *no* risk of TRs in our study, and LEX which *inhibits*  
45 MMP activity[41,42] exhibited a *large* risk. So we have to question whether  
46  
47  
48  
49  
50  
51  
52  
53  
54  
55  
56  
57  
58  
59  
60

1  
2  
3 metalloprotease activity has any relevance to TR risk, and consider other explanations for  
4  
5 the observed associations.  
6  
7  
8  
9

10 The indication for an antibiotic is a presumed bacterial infection. The reported  
11  
12 associations between antibiotics and TR could be a consequence of the indication rather  
13  
14 than the antibiotic itself and be an example of the confounding by indication bias.[43]  
15  
16 Such a bias could explain many reported associations between drugs and TR risk  
17  
18 including associations with non-antibiotic drugs reported by Nyysönen.[8]  
19  
20  
21  
22  
23

24 This bias could manifest in two ways. First, that the bacterial infection might directly  
25  
26 increase the risk of TR via stimulation of general immune or cytokine responses, or by  
27  
28 bacterial invasion. A recent study found gram-positive bacteria in a major share of  
29  
30 ruptured tendons but not in “control” tendons removed surgically for grafting,[44] giving  
31  
32 some plausibility to a hypothesis that bacterial invasion associated with the infection  
33  
34 treated by the antibiotic could be the culprit.  
35  
36  
37  
38  
39

40 Secondly, the greater clinical attention likely focused on patients needing systemic  
41  
42 antibiotics, especially those with severe infections, could increase the chance of noticing  
43  
44 and documenting a pre-existing TR. Furthermore, a reservoir of not-yet-diagnosed such  
45  
46 cases is likely to exist, because patients do not necessarily correctly identify joint and  
47  
48 extremity symptoms as TRs and seek immediate care for them. Tendon ruptures of the  
49  
50 shoulder capsule, for example, are notorious for developing symptoms slowly over 2-3  
51  
52 years[45] before being correctly diagnosed. Even Achilles tendon ruptures, can be missed  
53  
54  
55  
56  
57  
58  
59  
60

1  
2  
3 (in 30% of cases) at the first presentation.[46] Seeger et al. reviewed the medical records  
4  
5 of patients with an insurance claim reporting TRs following antibiotic use and found that  
6  
7 nearly half of the TRs recorded in the claims were either something else (e.g., Bursa  
8  
9 inflammation miscoded as a TR) or had occurred pre antibiotic use but only seen in a  
10  
11 claim post antibiotic use.[11]  
12  
13  
14  
15

16  
17 We cannot conclude that confounding by indication fully explains the observed TR  
18  
19 associations with LEX and LVX, but they are candidates that should be considered before  
20  
21 we rush to causal judgements about such associations.  
22  
23  
24  
25

### 26 **Limitation**

27  
28 This study faces all of the limitations of observational studies. Furthermore, it applies  
29  
30 only to fee-for-service Medicare populations. In addition, we had no options to verify  
31  
32 claims diagnoses via chart review.  
33  
34  
35  
36

### 37 **Funding Statement**

38  
39  
40  
41 This study is supported by the Intramural Research Program of the National Library of  
42  
43 Medicine, National Institutes of Health.  
44  
45  
46  
47

### 48 **Competing interests Statement**

49  
50  
51 All authors have no competing interest to declare.  
52  
53  
54  
55

### 56 **Contributorship Statement**

1  
2  
3 SB: study conception, design, analysis and interpretation; critical review of study content;  
4 manuscript drafting; approval of the final manuscript. JL: study concept and  
5 interpretation; manuscript drafting; approval of the final manuscript. VH: study  
6 conception and interpretation; manuscript drafting; approval of the final manuscript.  
7  
8 CJM: study conception, design and interpretation; critical review of study content;  
9 manuscript drafting; approval of the final manuscript.  
10  
11

### 12 **Data availability**

13  
14  
15 The authors confirm that the data supporting the findings of this study are available  
16 within the article [and/or] its supplementary materials.  
17  
18  
19

20  
21  
22  
23  
24  
25  
26  
27  
28 **Patient Consent for publication:** Not required.  
29

### 30 **Acknowledgements**

31  
32  
33 Jason Lau was with National Institutes of Health (NIH) during this work and now he is  
34 with the UC Davis Health.  
35

36  
37  
38 This work was partially supported by the Intramural Research Program of the National  
39 Library of Medicine, National Institutes of Health.  
40  
41

42  
43  
44 This research was made possible through the National Institutes of Health (NIH) Medical  
45 Research Scholars Program, a public-private partnership supported jointly by the NIH  
46 and generous contributions to the Foundation for the NIH from the Doris Duke  
47 Charitable Foundation, Genentech, the American Association for Dental Research, the  
48  
49  
50  
51  
52  
53  
54  
55  
56  
57

1  
2  
3 Colgate-Palmolive Company, Elsevier, alumni of student research programs, and other  
4  
5 individual supporters via contributions to the Foundation for the National Institutes of  
6  
7 Health. For a complete list, please visit the Foundation website at: [http://fnih.org/what-](http://fnih.org/what-we-do/current-education-and-training-programs/mrsp)  
8  
9 [we-do/current-education-and-training-programs/mrsp](http://fnih.org/what-we-do/current-education-and-training-programs/mrsp)  
10  
11  
12  
13  
14  
15  
16  
17  
18  
19  
20  
21  
22  
23  
24  
25  
26  
27  
28  
29  
30  
31  
32  
33  
34  
35  
36  
37  
38  
39  
40  
41  
42  
43  
44  
45  
46  
47  
48  
49  
50  
51  
52  
53  
54  
55  
56  
57  
58  
59  
60

For peer review only

## References

- 1 Hicks LA, Bartoces MG, Roberts RM, *et al.* US outpatient antibiotic prescribing variation according to geography, patient population, and provider specialty in 2011. *Clin Infect Dis* 2015;**60**:1308–16. doi:10.1093/cid/civ076
- 2 Magill SS, Edwards JR, Beldavs ZG, *et al.* Prevalence of Antimicrobial Use in US Acute Care Hospitals, May-September 2011. *JAMA* 2014;**312**:1438. doi:10.1001/jama.2014.12923
- 3 Daneman N, Lu H, Redelmeier DA. Fluoroquinolones and collagen associated severe adverse events: a longitudinal cohort study. *BMJ Open* 2015;**5**:e010077. doi:10.1136/bmjopen-2015-010077
- 4 Morales DR, Slattery J, Pacurariu A, *et al.* Relative and Absolute Risk of Tendon Rupture with Fluoroquinolone and Concomitant Fluoroquinolone/Corticosteroid Therapy: Population-Based Nested Case–Control Study. *Clin Drug Investig* 2019;**39**:205–13. doi:10.1007/s40261-018-0729-y
- 5 van der Linden PD, Sturkenboom MCJM, Herings RMC, *et al.* Increased Risk of Achilles Tendon Rupture With Quinolone Antibacterial Use, Especially in Elderly Patients Taking Oral Corticosteroids. *Arch Intern Med* 2003;**163**:1801. doi:10.1001/archinte.163.15.1801
- 6 Wise BL, Peloquin C, Choi H, *et al.* Impact of age, sex, obesity, and steroid use on quinolone-associated tendon disorders. *Am J Med* 2012;**125**:1228.e23-1228.e28. doi:10.1016/j.amjmed.2012.05.027
- 7 Sode J, Obel N, Hallas J, *et al.* Use of fluoroquinolone and risk of Achilles tendon rupture: a population-based cohort study. *Eur J Clin Pharmacol* 2007;**63**:499–503.

- 1  
2  
3 doi:10.1007/s00228-007-0265-9  
4  
5  
6 8 Nyysönen T, Lantto I, Lühje P, *et al.* Drug treatments associated with Achilles tendon  
7 rupture. A case-control study involving 1118 Achilles tendon ruptures. *Scand J Med Sci*  
8 *Sports* 2018;**28**:2625–9. doi:10.1111/sms.13281  
9  
10  
11  
12 9 WILTON L V., PEARCE GL, MANN RD. A comparison of ciprofloxacin, norfloxacin,  
13 ofloxacin, azithromycin and cefixime examined by observational cohort studies. *Br J Clin*  
14 *Pharmacol* 2003;**41**:277–84. doi:10.1046/j.1365-2125.1996.03013.x  
15  
16  
17  
18  
19 10 Jupiter DC, Fang X, Ashmore Z, *et al.* The Relative Risk of Achilles Tendon Injury in  
20 Patients Taking Quinolones. *Pharmacother J Hum Pharmacol Drug Ther* 2018;**38**:878–  
21 87. doi:10.1002/phar.2162  
22  
23  
24  
25  
26 11 Seeger JD, West WA, Fife D, *et al.* Achilles tendon rupture and its association with  
27 fluoroquinolone antibiotics and other potential risk factors in a managed care population.  
28 *Pharmacoepidemiol Drug Saf* 2006;**15**:784–92. doi:10.1002/pds.1214  
29  
30  
31  
32  
33 12 Hori K, Yamakawa K, Yoshida N, *et al.* Detection of fluoroquinolone-induced tendon  
34 disorders using a hospital database in Japan. *Pharmacoepidemiol Drug Saf* 2012;**21**:886–  
35 9. doi:10.1002/pds.3285  
36  
37  
38  
39  
40 13 Tanne JH. FDA adds ‘black box’ warning label to fluoroquinolone antibiotics. *BMJ*  
41 2008;**337**:a816. doi:10.1136/bmj.a816  
42  
43  
44  
45 14 Food and Drug Administration. FDA Drug Safety Communication: FDA advises  
46 restricting fluoroquinolone antibiotic use for certain uncomplicated infections; warns  
47 about disabling side effects that can occur together | FDA.  
48  
49  
50  
51 [https://www.fda.gov/drugs/drug-safety-and-availability/fda-drug-safety-communication-](https://www.fda.gov/drugs/drug-safety-and-availability/fda-drug-safety-communication-fda-advises-restricting-fluoroquinolone-antibiotic-use-certain)  
52 [fda-advises-restricting-fluoroquinolone-antibiotic-use-certain](https://www.fda.gov/drugs/drug-safety-and-availability/fda-drug-safety-communication-fda-advises-restricting-fluoroquinolone-antibiotic-use-certain) (accessed 12 Jun 2019).  
53  
54  
55  
56  
57  
58  
59  
60

- 1  
2  
3 15 Food and Drug Administration. FDA Drug Safety Communication: FDA updates  
4 warnings for oral and injectable fluoroquinolone antibiotics due to disabling side effects |  
5  
6 FDA. [https://www.fda.gov/drugs/drug-safety-and-availability/fda-drug-safety-](https://www.fda.gov/drugs/drug-safety-and-availability/fda-drug-safety-communication-fda-updates-warnings-oral-and-injectable-fluoroquinolone-antibiotics)  
7  
8 communication-fda-updates-warnings-oral-and-injectable-fluoroquinolone-antibiotics  
9  
10 (accessed 12 Jun 2019).  
11  
12  
13  
14  
15 16 Del Buono A, Oliva F, Osti L, *et al.* Metalloproteases and tendinopathy. *Muscles*  
16  
17 *Ligaments Tendons J* 2013;**3**:51–7. doi:10.11138/mltj/2013.3.1.051  
18  
19  
20 17 Tsai WC, Hsu CC, Chen CPC, *et al.* Ciprofloxacin up-regulates tendon cells to express  
21  
22 matrix metalloproteinase-2 with degradation of type i collagen. *J Orthop Res* 2011;**29**:67–  
23  
24 73. doi:10.1002/jor.21196  
25  
26  
27 18 Corps AN, Harrall RL, Curry VA, *et al.* Ciprofloxacin enhances the stimulation of matrix  
28  
29 metalloproteinase 3 expression by interleukin-1 $\beta$  in human tendon-derived cells: A  
30  
31 potential mechanism of fluoroquinolone-induced tendinopathy. *Arthritis Rheum*  
32  
33 2002;**46**:3034–40. doi:10.1002/art.10617  
34  
35  
36 19 CMS Virtual Research Data Center (VRDC) | ResDAC. [https://www.resdac.org/cms-](https://www.resdac.org/cms-virtual-research-data-center-vrdc)  
37  
38 virtual-research-data-center-vrdc (accessed 4 Oct 2019).  
39  
40  
41 20 Cubanski J, Swoope C, Boccuti C, *et al.* A Primer on Medicare. 2015.  
42  
43 [http://files.kff.org/attachment/report-a-primer-on-medicare-key-facts-about-the-medicare-](http://files.kff.org/attachment/report-a-primer-on-medicare-key-facts-about-the-medicare-program-and-the-people-it-covers)  
44  
45 program-and-the-people-it-covers (accessed 7 Feb 2019).  
46  
47  
48 21 Johnson ES, Bartman BA, Briesacher BA, *et al.* The incident user design in comparative  
49  
50 effectiveness research. *Pharmacoepidemiol Drug Saf* 2013;**22**:1–6. doi:10.1002/pds.3334  
51  
52  
53 22 Fine JP, Gray RJ. A Proportional Hazards Model for the Subdistribution of a Competing  
54  
55 Risk. *J Am Stat Assoc* 1999;**94**:496. doi:10.2307/2670170  
56  
57  
58  
59  
60



- 1  
2  
3 23 Berry SD, Ngo L, Samelson EJ, *et al.* Competing risk of death: An important  
4 consideration in studies of older adults. *J Am Geriatr Soc* 2010;**58**:783–7.  
5  
6 doi:10.1111/j.1532-5415.2010.02767.x  
7  
8  
9  
10 24 Putter H, Fiocco M, Geskus RB. Tutorial in biostatistics: competing risks and multi-state  
11 models. *Stat Med* 2007;**26**:2389–430. doi:10.1002/sim.2712  
12  
13  
14 25 The Chronic Condition Warehouse. Chronic Conditions Data Warehouse: CCW Chronic  
15 Condition Algorithms. <https://www.ccwdata.org/web/guest/condition-categories> (accessed  
16 23 Jan 2017).  
17  
18  
19  
20  
21 26 The Medicare Payment Advisory Commission. MedPAC Data book: Beneficiaries dually  
22 eligible for Medicare and Medicaid - January 2016. 2016.  
23  
24 [http://www.medpac.gov/docs/default-source/publications/january-2016-medpac-and-](http://www.medpac.gov/docs/default-source/publications/january-2016-medpac-and-macpac-data-book-beneficiaries-dually-eligible-for-medicare-and-medicaid.pdf?sfvrsn=0)  
25 [macpac-data-book-beneficiaries-dually-eligible-for-medicare-and-medicaid.pdf?sfvrsn=0](http://www.medpac.gov/docs/default-source/publications/january-2016-medpac-and-macpac-data-book-beneficiaries-dually-eligible-for-medicare-and-medicaid.pdf?sfvrsn=0)  
26 (accessed 23 Jan 2017).  
27  
28  
29  
30  
31  
32  
33 27 Stricker BHC, Stijnen T. Analysis of individual drug use as a time-varying determinant of  
34 exposure in prospective population-based cohort studies. *Eur J Epidemiol* 2010;**25**:245–  
35 51. doi:10.1007/s10654-010-9451-7  
36  
37  
38  
39  
40 28 Shariff SZ, Cuerden MS, Jain AK, *et al.* The secret of immortal time bias in  
41 epidemiologic studies. *J Am Soc Nephrol* 2008;**19**:841–3. doi:10.1681/ASN.2007121354  
42  
43  
44 29 Shintani AK, Girard TD, Eden SK, *et al.* Immortal time bias in critical care research:  
45 application of time-varying Cox regression for observational cohort studies. *Crit Care*  
46 *Med* 2009;**37**:2939–45. doi:10.1097/CCM.0b013e3181b7fbbb  
47  
48  
49  
50  
51 30 Rosenbaum PR, Rubin DB. The Central Role of the Propensity Score in Observational  
52 Studies for Causal Effects. *Biometrika* 1983;**70**:41–55.  
53  
54  
55  
56  
57  
58  
59  
60

- 1  
2  
3 31 Austin PC. An Introduction to Propensity Score Methods for Reducing the Effects of  
4 Confounding in Observational Studies. *Multivariate Behav Res* 2011;**46**:399–424.  
5  
6 doi:10.1080/00273171.2011.568786  
7  
8  
9  
10 32 Austin PC, Stuart EA. The performance of inverse probability of treatment weighting and  
11 full matching on the propensity score in the presence of model misspecification when  
12 estimating the effect of treatment on survival outcomes. *Stat Methods Med Res*  
13 2017;**26**:1654–70. doi:10.1177/0962280215584401  
14  
15  
16  
17  
18 33 Zakaria MHB, Davis WA, Davis TME. Incidence and predictors of hospitalization for  
19 tendon rupture in Type 2 diabetes: the Fremantle Diabetes Study. *Diabet Med*  
20 2014;**31**:425–30. doi:10.1111/dme.12344  
21  
22  
23  
24  
25 34 Basic-Jukic N, Juric I, Racki S, *et al.* Spontaneous tendon ruptures in patients with end-  
26 stage renal disease. *Kidney Blood Press Res* 2009;**32**:32–6. doi:10.1159/000201792  
27  
28  
29 35 Khaliq Y, Zhanel GG. Fluoroquinolone-Associated Tendinopathy: A Critical Review of  
30 the Literature. *Clin Infect Dis* 2003;**36**:1404–10. doi:10.1086/375078  
31  
32  
33  
34 36 White DW, Wenke JC, Mosely DS, *et al.* Incidence of Major Tendon Ruptures and  
35 Anterior Cruciate Ligament Tears in US Army Soldiers. *Am J Sports Med* 2007;**35**:1308–  
36 14. doi:10.1177/0363546507301256  
37  
38  
39  
40  
41 37 Owens B, Mountcastle S, White D. Racial Differences in Tendon Rupture Incidence. *Int J*  
42 *Sports Med* 2007;**28**:617–20. doi:10.1055/s-2007-964837  
43  
44  
45  
46 38 Corps AN, Harrall RL, Curry VA, *et al.* Contrasting effects of fluoroquinolone antibiotics  
47 on the expression of the collagenases, matrix metalloproteinases (MMP)-1 and -13, in  
48 human tendon-derived cells. *Rheumatology* 2005;**44**:1514–7.  
49  
50  
51  
52  
53  
54  
55  
56  
57  
58  
59  
60

- 1  
2  
3 39 Sharma C, Velpandian T, Baskar Singh S, *et al.* Effect of fluoroquinolones on the  
4 expression of matrix metalloproteinase in debrided cornea of rats. *Toxicol Mech Methods*  
5 2011;**21**:6–12. doi:10.3109/15376516.2010.529183  
6  
7  
8  
9  
10 40 Sbardella D, Tundo G, Fasciglione G, *et al.* Role of Metalloproteinases in Tendon  
11 Pathophysiology. *Mini-Reviews Med Chem* 2014;**14**:978–87.  
12  
13 doi:10.2174/1389557514666141106132411  
14  
15  
16  
17 41 Santavirta S, Takagi M, Konttinen YT, *et al.* Inhibitory effect of cephalothin on matrix  
18 metalloproteinase activity around loose hip prostheses. *Antimicrob Agents Chemother*  
19 1996;**40**:244–6. doi:10.1128/AAC.40.1.244  
20  
21  
22  
23  
24 42 Kannan R, Ruff M, Kochins JG, *et al.* Purification of Active Matrix Metalloproteinase  
25 Catalytic Domains and Its Use for Screening of Specific Stromelysin-3 Inhibitors. *Protein*  
26 *Expr Purif* 1999;**16**:76–83. doi:10.1006/PREP.1999.1068  
27  
28  
29  
30  
31 43 de Koning JS, Klazinga NS, Koudstaal PJ, *et al.* The role of ‘confounding by indication’  
32 in assessing the effect of quality of care on disease outcomes in general practice: results of  
33 a case-control study. *BMC Health Serv Res* 2005;**5**:10. doi:10.1186/1472-6963-5-10  
34  
35  
36  
37  
38 44 Rolf CG, Fu S-C, Hopkins C, *et al.* Presence of Bacteria in Spontaneous Achilles Tendon  
39 Ruptures. *Am J Sports Med* 2017;**45**:2061–7. doi:10.1177/0363546517696315  
40  
41  
42  
43 45 Tashjian RZ. Epidemiology, Natural History, and Indications for Treatment of Rotator  
44 Cuff Tears. *Clin Sports Med* 2012;**31**:589–604. doi:10.1016/J.CSM.2012.07.001  
45  
46  
47 46 Christensen I. Rupture of the Achilles tendon; analysis of 57 cases. *Acta Chir Scand*  
48 1953;**106**:50–60.  
49  
50  
51  
52  
53  
54  
55  
56  
57  
58  
59  
60

1  
2  
3 **Figure 1. Consort Diagram**  
4  
5  
6  
7  
8  
9  
10  
11  
12  
13  
14  
15  
16  
17  
18  
19  
20  
21  
22  
23  
24  
25  
26  
27  
28  
29  
30  
31  
32  
33  
34  
35  
36  
37  
38  
39  
40  
41  
42  
43  
44  
45  
46  
47  
48  
49  
50  
51  
52  
53  
54  
55  
56  
57  
58  
59  
60

For peer review only

**Table 1. Outcome, Medical/Medication Use, Diseases and Patient Characteristics by Type of Antibiotics**

| Variable                                 | Overall         | FLQ             | CIP             | LVX             | MXF             | AMX             | AZM             | LEX             | AMC             | None           |
|------------------------------------------|-----------------|-----------------|-----------------|-----------------|-----------------|-----------------|-----------------|-----------------|-----------------|----------------|
| N                                        | 1,009,925       | 328,654         | 234,994         | 155,991         | 14,728          | 259,125         | 308,985         | 195,731         | 179,616         | 356,364        |
| Tendon Rupture                           | 34,880(3.5)     | 12,517(3.8)     | 8,811(3.7)      | 5,904(3.8)      | 770(5.2)        | 9,636(3.7)      | 12,448(4.0)     | 8,019(4.1)      | 6,622(3.7)      | 10,169(2.9)    |
| Death                                    | 46,468(4.6)     | 23,249(7.1)     | 14,821(6.3)     | 14,610(9.4)     | 2,136(14.5)     | 9,632(3.7)      | 14,608(4.7)     | 11,394(5.8)     | 9,951(5.5)      | 13,645(3.8)    |
| Censored at HMO entry                    | 127,162(12.6)   | 27,573(8.4)     | 19,847(8.4)     | 11,142(7.1)     | 1,571(10.7)     | 21,215(8.2)     | 26,140(8.5)     | 14,887(7.6)     | 12,674(7.1)     | 65,886(18.5)   |
| Censored at disenrollment                | 145(0.0)        | 25(0.0)         | 13(0.0)         | 13(0.0)         | 2(0.0)          | 19(0.0)         | 27(0.0)         | 23(0.0)         | 16(0.0)         | 85(0.0)        |
| Censored at Dec 31 2016                  | 801,270(79.3)   | 265,290(80.7)   | 191,502(81.5)   | 124,322(79.7)   | 10,249(69.6)    | 218,623(84.4)   | 255,762(82.8)   | 161,408(82.5)   | 150,353(83.7)   | 266,579(74.8)  |
| Years of follow-up, median(total)        | 3.6(4,030,897)  | 4.6(1,620,894)  | 4.8(1,190,308)  | 4.8(789,849)    | 6.0(87,397)     | 4.5(1,274,357)  | 4.6(1,529,370)  | 4.8(1,000,459)  | 4.6(890,340)    | 2.5(1,067,731) |
| Tendon rupture, 1000 person-years        | 8.65            | 7.72            | 7.40            | 7.47            | 8.81            | 7.56            | 8.14            | 8.02            | 7.44            | 9.52           |
| Death, 1000 person-years                 | 11.53           | 14.34           | 12.45           | 18.50           | 24.44           | 7.56            | 9.55            | 11.39           | 11.18           | 12.78          |
| Female                                   | 575,885(57.0)   | 197,915(60.2)   | 146,745(62.4)   | 89,682(57.5)    | 8,747(59.4)     | 151,383(58.4)   | 194,101(62.8)   | 113,308(57.9)   | 104,749(58.3)   | 191,069(53.6)  |
| White                                    | 814,933(80.7)   | 274,785(83.6)   | 196,048(83.4)   | 131,725(84.4)   | 12,464(84.6)    | 215,101(83.0)   | 259,657(84.0)   | 167,825(85.7)   | 153,723(85.6)   | 271,906(76.3)  |
| Black                                    | 75,930(7.5)     | 20,017(6.1)     | 14,286(6.1)     | 8,893(5.7)      | 956(6.5)        | 15,622(6.0)     | 17,296(5.6)     | 9,625(4.9)      | 9,199(5.1)      | 35,023(9.8)    |
| Hispanic                                 | 56,582(5.6)     | 17,044(5.2)     | 12,607(5.4)     | 7,943(5.1)      | 628(4.3)        | 12,494(4.8)     | 14,805(4.8)     | 8,976(4.6)      | 7,802(4.3)      | 24,391(6.8)    |
| Asian                                    | 26,336(2.6)     | 7,316(2.2)      | 5,362(2.3)      | 3,144(2.0)      | 356(2.4)        | 7,624(2.9)      | 7,945(2.6)      | 3,539(1.8)      | 3,440(1.9)      | 10,437(2.9)    |
| Other                                    | 36,144(3.6)     | 9,492(2.9)      | 6,691(2.8)      | 4,286(2.7)      | 324(2.2)        | 8,284(3.2)      | 9,282(3.0)      | 5,766(2.9)      | 5,452(3.0)      | 14,607(4.1)    |
| Ever Dual                                | 162,988(16.1)   | 54,055(16.4)    | 38,277(16.3)    | 28,156(18.0)    | 2,908(19.7)     | 35,305(13.6)    | 44,940(14.5)    | 30,962(15.8)    | 25,255(14.1)    | 66,986(18.8)   |
| Non-Dual LIS                             | 26,955(2.7)     | 7,648(2.3)      | 5,459(2.3)      | 3,746(2.4)      | 385(2.6)        | 5,224(2.0)      | 6,828(2.2)      | 4,191(2.1)      | 3,818(2.1)      | 12,595(3.5)    |
| Non-Dual No LIS                          | 819,982(81.2)   | 266,951(81.2)   | 191,258(81.4)   | 124,089(79.5)   | 11,435(77.6)    | 218,596(84.4)   | 257,217(83.2)   | 160,578(82.0)   | 150,543(83.8)   | 276,783(77.7)  |
| Living in rural area                     | 228,199(22.6)   | 78,581(23.9)    | 56,385(24.0)    | 38,847(24.9)    | 2,801(19.0)     | 58,805(22.7)    | 72,282(23.4)    | 49,977(25.5)    | 42,288(23.5)    | 77,087(21.6)   |
| Days on Rx, median (IQR)                 | N/A             | N/A             | 10.0(7.0-20.0)  | 10.0(7.0-17.0)  | 10.0(7.0-12.0)  | 10.0(7.0-20.0)  | 5.0(5.0-11.0)   | 10.0(7.0-16.0)  | 10.0(10.0-20.0) | N/A            |
| Hospitalization                          | 349,959(29.5)   | 198,846(45.4)   | 142,538(45.3)   | 113,829(52.5)   | 14,002(60.3)    | 132,304(38.8)   | 156,185(37.9)   | 119,209(45.9)   | 103,515(42.5)   | 51,525(14.4)   |
| Outpatient visits per year, median (IQR) | 19.6(11.1-33.0) | 27.1(17.2-42.7) | 27.3(17.5-42.9) | 30.1(19.0-47.8) | 34.0(21.7-53.7) | 23.6(14.5-37.5) | 24.6(15.5-38.8) | 27.5(17.2-43.2) | 26.6(16.7-42.2) | 12.3(6.0-21.8) |
| AMI                                      | 21,222(2.1)     | 9,999(3.0)      | 6,810(2.9)      | 5,862(3.8)      | 698(4.7)        | 6,474(2.5)      | 8,079(2.6)      | 6,215(3.2)      | 5,292(2.9)      | 5,012(1.4)     |
| Atrial Fibrillation                      | 71,635(7.1)     | 31,752(9.7)     | 21,757(9.3)     | 17,731(11.4)    | 2,028(13.8)     | 23,974(9.3)     | 26,182(8.5)     | 21,935(11.2)    | 18,764(10.4)    | 16,314(4.6)    |
| Cataract                                 | 468,608(46.4)   | 183,870(55.9)   | 134,196(57.1)   | 88,574(56.8)    | 9,216(62.6)     | 144,455(55.7)   | 174,897(56.6)   | 112,020(57.2)   | 101,079(56.3)   | 124,931(35.1)  |
| Chronic Kidney Disease                   | 180,441(17.9)   | 86,021(26.2)    | 62,323(26.5)    | 46,121(29.6)    | 4,651(31.6)     | 53,713(20.7)    | 65,577(21.2)    | 50,361(25.7)    | 43,182(24.0)    | 42,916(12.0)   |
| COPD                                     | 130,840(13.0)   | 71,913(21.9)    | 43,961(18.7)    | 48,430(31.0)    | 6,106(41.5)     | 40,109(15.5)    | 66,536(21.5)    | 37,413(19.1)    | 37,579(20.9)    | 22,739(6.4)    |
| Heart Failure                            | 103,010(10.2)   | 51,814(15.8)    | 34,870(14.8)    | 31,377(20.1)    | 3,776(25.6)     | 32,792(12.7)    | 41,647(13.5)    | 31,585(16.1)    | 27,223(15.2)    | 21,907(6.1)    |
| Diabetes                                 | 284,919(28.2)   | 113,424(34.5)   | 81,175(34.5)    | 57,697(37.0)    | 5,942(40.3)     | 81,155(31.3)    | 98,176(31.8)    | 67,548(34.5)    | 59,984(33.4)    | 81,448(22.9)   |
| Glaucoma                                 | 150,839(14.9)   | 56,990(17.3)    | 41,984(17.9)    | 26,603(17.1)    | 2,930(19.9)     | 45,597(17.6)    | 54,726(17.7)    | 33,936(17.3)    | 31,065(17.3)    | 42,355(11.9)   |
| Hip/Pelvic Fracture                      | 7,982(0.8)      | 4,086(1.2)      | 3,000(1.3)      | 2,289(1.5)      | 274(1.9)        | 2,673(1.0)      | 3,005(1.0)      | 2,515(1.3)      | 1,914(1.1)      | 1,689(0.5)     |
| Ischemic Heart Disease                   | 264,648(26.2)   | 117,416(35.7)   | 82,182(35.0)    | 63,659(40.8)    | 6,956(47.2)     | 83,682(32.3)    | 101,999(33.0)   | 70,612(36.1)    | 63,363(35.3)    | 63,372(17.8)   |
| Depression                               | 210,714(20.9)   | 94,554(28.8)    | 68,625(29.2)    | 49,277(31.6)    | 5,298(36.0)     | 65,642(25.3)    | 83,253(26.9)    | 56,747(29.0)    | 51,150(28.5)    | 49,320(13.8)   |
| Alzheimer's Disease or Senile Dementia   | 39,132(3.9)     | 19,796(6.0)     | 14,309(6.1)     | 11,030(7.1)     | 1,206(8.2)      | 11,140(4.3)     | 13,809(4.5)     | 11,846(6.1)     | 9,309(5.2)      | 9,400(2.6)     |
| Osteoporosis                             | 106,966(10.6)   | 47,033(14.3)    | 35,217(15.0)    | 22,918(14.7)    | 2,738(18.6)     | 34,610(13.4)    | 44,016(14.2)    | 26,996(13.8)    | 24,393(13.6)    | 25,216(7.1)    |

|                                                       |               |               |               |               |              |               |               |               |               |               |
|-------------------------------------------------------|---------------|---------------|---------------|---------------|--------------|---------------|---------------|---------------|---------------|---------------|
| Rheumatoid Arthritis/Osteoarthritis                   | 369,584(36.6) | 160,091(48.7) | 117,018(49.8) | 80,115(51.4)  | 8,259(56.1)  | 126,702(48.9) | 148,653(48.1) | 101,310(51.8) | 88,017(49.0)  | 81,855(23.0)  |
| 1 Stroke/Transient Ischemic Attack                    | 58,886(5.8)   | 27,702(8.4)   | 19,843(8.4)   | 15,051(9.6)   | 1,670(11.3)  | 17,829(6.9)   | 22,038(7.1)   | 16,684(8.5)   | 14,245(7.9)   | 14,262(4.0)   |
| 2 Breast Cancer                                       | 45,316(4.5)   | 19,362(5.9)   | 14,344(6.1)   | 9,442(6.1)    | 984(6.7)     | 13,451(5.2)   | 17,676(5.7)   | 12,543(6.4)   | 10,156(5.7)   | 11,042(3.1)   |
| 3 Colorectal Cancer                                   | 15,905(1.6)   | 7,487(2.3)    | 5,421(2.3)    | 4,048(2.6)    | 390(2.6)     | 4,304(1.7)    | 5,170(1.7)    | 4,085(2.1)    | 3,605(2.0)    | 4,104(1.2)    |
| 4 Prostate Cancer                                     | 37,038(3.7)   | 19,705(6.0)   | 15,577(6.6)   | 9,232(5.9)    | 643(4.4)     | 10,967(4.2)   | 11,733(3.8)   | 9,252(4.7)    | 8,070(4.5)    | 8,333(2.3)    |
| 5 Lung Cancer                                         | 14,946(1.5)   | 8,965(2.7)    | 5,144(2.2)    | 6,356(4.1)    | 905(6.1)     | 3,859(1.5)    | 6,633(2.1)    | 3,977(2.0)    | 4,267(2.4)    | 2,733(0.8)    |
| 6 Endometrial Cancer                                  | 7,396(0.7)    | 3,447(1.0)    | 2,670(1.1)    | 1,635(1.0)    | 160(1.1)     | 2,095(0.8)    | 2,637(0.9)    | 1,957(1.0)    | 1,604(0.9)    | 1,847(0.5)    |
| 8 Anemia                                              | 307,310(30.4) | 140,606(42.8) | 100,819(42.9) | 74,308(47.6)  | 7,980(54.2)  | 99,190(38.3)  | 118,327(38.3) | 81,967(41.9)  | 72,587(40.4)  | 71,098(20.0)  |
| 9 Asthma                                              | 86,120(8.5)   | 46,350(14.1)  | 29,327(12.5)  | 30,152(19.3)  | 4,091(27.8)  | 27,632(10.7)  | 46,823(15.2)  | 24,426(12.5)  | 25,465(14.2)  | 13,802(3.9)   |
| 10 Hyperlipidemia                                     | 691,148(68.4) | 257,086(78.2) | 185,199(78.8) | 123,828(79.4) | 12,162(82.6) | 199,236(76.9) | 239,414(77.5) | 152,879(78.1) | 140,364(78.1) | 201,258(56.5) |
| 11 Hyperplasia                                        | 122,010(12.1) | 59,809(18.2)  | 45,517(19.4)  | 28,616(18.3)  | 2,587(17.6)  | 39,031(15.1)  | 42,070(13.6)  | 31,606(16.1)  | 28,398(15.8)  | 27,336(7.7)   |
| 11 Hypertension                                       | 679,287(67.3) | 253,601(77.2) | 181,231(77.1) | 124,646(79.9) | 12,218(83.0) | 192,686(74.4) | 230,409(74.6) | 150,995(77.1) | 136,292(75.9) | 201,777(56.6) |
| 13 Hypothyroidism                                     | 197,447(19.6) | 81,468(24.8)  | 59,450(25.3)  | 40,372(25.9)  | 4,198(28.5)  | 59,893(23.1)  | 76,582(24.8)  | 47,973(24.5)  | 44,249(24.6)  | 50,280(14.1)  |
| 14 Anxiety Disorders                                  | 148,983(14.8) | 70,688(21.5)  | 51,377(21.9)  | 37,563(24.1)  | 4,032(27.4)  | 48,859(18.9)  | 62,418(20.2)  | 41,655(21.3)  | 37,588(20.9)  | 31,709(8.9)   |
| 15 Bipolar Disorder                                   | 17,882(1.8)   | 8,368(2.5)    | 6,104(2.6)    | 4,533(2.9)    | 468(3.2)     | 5,442(2.1)    | 6,658(2.2)    | 5,147(2.6)    | 4,227(2.4)    | 4,242(1.2)    |
| 16 Major Depressive Affective Disorder                | 153,182(15.2) | 71,732(21.8)  | 52,101(22.2)  | 38,055(24.4)  | 4,148(28.2)  | 48,846(18.9)  | 61,872(20.0)  | 43,416(22.2)  | 38,642(21.5)  | 33,660(9.4)   |
| 17 Schizophrenia and other Psychotic Disorders        | 16,764(1.7)   | 8,591(2.6)    | 6,176(2.6)    | 4,934(3.2)    | 548(3.7)     | 4,421(1.7)    | 5,597(1.8)    | 5,101(2.6)    | 3,811(2.1)    | 4,300(1.2)    |
| 18 Epilepsy                                           | 16,155(1.6)   | 7,543(2.3)    | 5,383(2.3)    | 4,269(2.7)    | 415(2.8)     | 4,310(1.7)    | 5,488(1.8)    | 4,510(2.3)    | 3,621(2.0)    | 4,191(1.2)    |
| 19 Fibromyalgia, Chronic Pain and Fatigue             | 166,279(16.5) | 78,877(24.0)  | 57,494(24.5)  | 41,843(26.8)  | 4,410(29.9)  | 56,152(21.7)  | 70,667(22.9)  | 48,422(24.7)  | 43,379(24.2)  | 33,843(9.5)   |
| 20 Viral Hepatitis (General)                          | 11,969(1.2)   | 4,659(1.4)    | 3,188(1.4)    | 2,523(1.6)    | 287(1.9)     | 3,156(1.2)    | 3,732(1.2)    | 2,712(1.4)    | 2,348(1.3)    | 3,735(1.0)    |
| 21 Liver Disease Cirrhosis and other Liver Conditions | 62,675(6.2)   | 31,930(9.7)   | 23,284(9.9)   | 17,386(11.1)  | 1,919(13.0)  | 19,624(7.6)   | 24,544(7.9)   | 17,393(8.9)   | 15,958(8.9)   | 13,350(3.7)   |
| 22 Leukemias and Lymphomas                            | 13,906(1.4)   | 7,228(2.2)    | 4,822(2.1)    | 4,536(2.9)    | 551(3.7)     | 4,385(1.7)    | 5,905(1.9)    | 4,025(2.1)    | 3,969(2.2)    | 2,758(0.8)    |
| 24 Migraine and other Chronic Headache                | 31,628(3.1)   | 14,936(4.5)   | 11,282(4.8)   | 7,520(4.8)    | 873(5.9)     | 10,841(4.2)   | 13,893(4.5)   | 8,763(4.5)    | 8,403(4.7)    | 6,419(1.8)    |
| 25 Mobility Impairments                               | 20,600(2.0)   | 10,182(3.1)   | 7,356(3.1)    | 5,767(3.7)    | 577(3.9)     | 5,372(2.1)    | 6,629(2.1)    | 5,995(3.1)    | 4,610(2.6)    | 5,439(1.5)    |
| 26 Obesity                                            | 185,101(18.3) | 79,130(24.1)  | 56,609(24.1)  | 41,226(26.4)  | 3,997(27.1)  | 58,654(22.6)  | 69,611(22.5)  | 49,984(25.5)  | 43,740(24.4)  | 44,772(12.6)  |
| 27 Peripheral Vascular Disease                        | 90,132(8.9)   | 45,276(13.8)  | 31,866(13.6)  | 25,977(16.7)  | 3,001(20.4)  | 28,747(11.1)  | 36,241(11.7)  | 28,343(14.5)  | 23,977(13.3)  | 18,446(5.2)   |
| 28 Tobacco Use Disorders                              | 101,890(10.1) | 45,304(13.8)  | 28,907(12.3)  | 27,202(17.4)  | 3,042(20.7)  | 27,261(10.5)  | 37,860(12.3)  | 25,002(12.8)  | 22,975(12.8)  | 26,896(7.5)   |
| 29 Pressure Ulcers and Chronic Ulcers                 | 30,345(3.0)   | 17,688(5.4)   | 12,800(5.4)   | 10,603(6.8)   | 1,196(8.1)   | 9,006(3.5)    | 10,926(3.5)   | 13,404(6.8)   | 9,960(5.5)    | 4,992(1.4)    |
| 30 Deafness and Hearing Impairment                    | 59,576(5.9)   | 27,383(8.3)   | 19,976(8.5)   | 14,014(9.0)   | 1,609(10.9)  | 21,213(8.2)   | 25,498(8.3)   | 16,849(8.6)   | 16,787(9.3)   | 11,900(3.3)   |

Note. Data are presented as No. (%) of patients unless otherwise noted.

Abbreviations: FLQ, fluoroquinolone; CIP, ciprofloxacin; LVX, levofloxacin; MXF, moxifloxacin; AMX, Amoxicillin; AMC, Amoxicillin Clavulanate; AZT, Azithromycin; LEX, Cephalexin; IQR, interquartile range.

**Table 2. Hazard Ratios of Tendon Rupture for Each Covariate**

| Variables                                     | Reference                  | HR(95% CI)       |
|-----------------------------------------------|----------------------------|------------------|
| <b>Female</b>                                 | Male                       | 0.70(0.69,0.72)‡ |
| <b>Black</b>                                  | White                      | 0.76(0.73,0.78)‡ |
| <b>Hispanic</b>                               |                            | 0.91(0.87,0.94)‡ |
| <b>Asian</b>                                  |                            | 0.67(0.63,0.71)‡ |
| <b>Other</b>                                  |                            | 1.05(1.01,1.09)† |
| <b>Dual Ever</b>                              |                            | Non-Dual Non-LIS |
| <b>Non-Dual Lis</b>                           |                            | 0.66(0.63,0.70)‡ |
| <b>Living In Rural Area</b>                   | No                         | 0.94(0.92,0.95)‡ |
| <b>Medicare Part D Since 2008</b>             | Medicare Part D Since 2007 | 1.03(1.00,1.07)  |
| <b>Medicare Part D Since 2009</b>             |                            | 1.11(1.07,1.15)‡ |
| <b>Medicare Part D Since 2010</b>             |                            | 1.16(1.12,1.21)‡ |
| <b>Medicare Part D Since 2011</b>             |                            | 1.17(1.13,1.22)‡ |
| <b>Medicare Part D Since 2012</b>             |                            | 1.12(1.08,1.16)‡ |
| <b>Medicare Part D Since 2013</b>             |                            | 1.03(1.00,1.07)  |
| <b>Medicare Part D Since 2013</b>             |                            | 1.05(1.01,1.09)† |
| <b>Medicare Part D Since 2015</b>             |                            | 0.91(0.87,0.96)‡ |
| <b>Medicare Part D Since 2016</b>             |                            | 0.93(0.19,4.55)  |
| <b>AMI</b>                                    |                            | No               |
| <b>Atrial Fibrillation</b>                    | No                         | 0.94(0.91,0.97)‡ |
| <b>Cataract</b>                               | No                         | 1.23(1.21,1.25)‡ |
| <b>Chronic Kidney Disease</b>                 | No                         | 0.92(0.89,0.94)‡ |
| <b>COPD</b>                                   | No                         | 0.83(0.81,0.86)‡ |
| <b>Heart Failure</b>                          | No                         | 0.79(0.77,0.82)‡ |
| <b>Diabetes</b>                               | No                         | 0.98(0.96,0.99)† |
| <b>Glaucoma</b>                               | No                         | 1.10(1.08,1.12)‡ |
| <b>Hip/Pelvic Fracture</b>                    | No                         | 0.68(0.60,0.77)‡ |
| <b>Ischemic Heart Disease</b>                 | No                         | 1.10(1.08,1.12)‡ |
| <b>Depression</b>                             | No                         | 1.17(1.13,1.21)  |
| <b>Alzheimer's Disease or Senile Dementia</b> | No                         | 0.67(0.63,0.71)‡ |
| <b>Osteoporosis</b>                           | No                         | 1.03(1.01,1.06)† |
| <b>Rheumatoid Arthritis/Osteoarthritis</b>    | No                         | 2.84(2.80,2.89)‡ |
| <b>Stroke/Transient Ischemic Attack</b>       | No                         | 0.97(0.94,1.01)  |
| <b>Breast Cancer</b>                          | No                         | 0.94(0.91,0.98)† |
| <b>Colorectal Cancer</b>                      | No                         | 0.79(0.74,0.85)‡ |

|    |                                                           |    |                  |
|----|-----------------------------------------------------------|----|------------------|
| 1  | <b>Prostate Cancer</b>                                    | No | 1.03(0.99,1.07)  |
| 2  | <b>Lung Cancer</b>                                        | No | 0.39(0.34,0.45)‡ |
| 3  | <b>Endometrial Cancer</b>                                 | No | 0.85(0.77,0.94)† |
| 4  | <b>Anemia</b>                                             | No | 1.01(0.99,1.03)  |
| 5  | <b>Asthma</b>                                             | No | 1.27(1.24,1.31)‡ |
| 6  | <b>Hyperlipidemia</b>                                     | No | 1.34(1.31,1.36)‡ |
| 7  | <b>Hyperplasia</b>                                        | No | 1.13(1.10,1.16)‡ |
| 8  | <b>Hypertension</b>                                       | No | 1.09(1.07,1.11)‡ |
| 9  | <b>Hypothyroidism</b>                                     | No | 1.08(1.06,1.10)‡ |
| 10 | <b>Anxiety Disorders</b>                                  | No | 0.98(0.96,1.01)  |
| 11 | <b>Bipolar Disorder</b>                                   | No | 1.02(0.95,1.08)  |
| 12 | <b>Major Depressive Affective Disorder</b>                | No | 1.06(1.02,1.10)† |
| 13 | <b>Schizophrenia and Other Psychotic Disorders</b>        | No | 0.67(0.61,0.74)‡ |
| 14 | <b>Epilepsy</b>                                           | No | 0.83(0.77,0.90)‡ |
| 15 | <b>Fibromyalgia, Chronic Pain and Fatigue</b>             | No | 1.39(1.36,1.42)‡ |
| 16 | <b>Viral Hepatitis (General)</b>                          | No | 1.04(0.96,1.13)  |
| 17 | <b>Liver Disease Cirrhosis And Other Liver Conditions</b> | No | 0.95(0.92,0.99)† |
| 18 | <b>Leukemias and Lymphomas</b>                            | No | 0.94(0.88,1.01)  |
| 19 | <b>Migraine and Other Chronic Headache</b>                | No | 1.28(1.23,1.33)‡ |
| 20 | <b>Mobility Impairments</b>                               | No | 0.70(0.65,0.76)‡ |
| 21 | <b>Obesity</b>                                            | No | 1.04(1.02,1.06)† |
| 22 | <b>Peripheral Vascular Disease</b>                        | No | 1.00(0.97,1.04)  |
| 23 | <b>Tobacco Use Disorders</b>                              | No | 0.82(0.80,0.85)‡ |
| 24 | <b>Pressure Ulcers and Chronic Ulcers</b>                 | No | 0.82(0.77,0.87)‡ |
| 25 | <b>Deafness and Hearing Impairment</b>                    | No | 1.21(1.17,1.25)‡ |

Abbreviations: HR, hazard ratio, CI, confidence interval; FLQ, fluoroquinolone; CIP, ciprofloxacin; LVX, levofloxacin; MXF, moxifloxacin; AMX, Amoxicillin; AMC, Amoxicillin Clavulanate; AZT, Azithromycin; LEX, Cephalexin.

‡ = P-value < 0.001

† = 0.001 ≤ P-value < 0.05



**Table 3. Hazard Ratios of Each Antibiotic by Anatomic Sites and Temporal Order of Drug Exposure**

|                |                   | Any Tendon Rupture | Achilles Tendon Rupture | Complete Rupture of Rotator Cuff | Other Tendon Rupture |
|----------------|-------------------|--------------------|-------------------------|----------------------------------|----------------------|
|                | Temporal Exposure | HR(95% CI)         | HR(95% CI)              | HR(95% CI)                       | HR(95% CI)           |
| AMX VS. NO AMX | ≤ 30 days         | 0.86(0.80,0.92)‡   | 0.88(0.59,1.33)         | 0.88(0.82,0.95)†                 | 0.79(0.67,0.93)†     |
|                | 31 – 60 days      | 0.94(0.87,1.01)    | 0.80(0.49,1.31)         | 0.91(0.84,0.99)†                 | 1.08(0.93,1.27)      |
|                | ≥ 61 days         | 1.00(0.98,1.02)    | 0.99(0.86,1.13)         | 1.01(0.99,1.04)                  | 0.97(0.92,1.01)      |
| AMC VS. NO AMC | ≤ 30 days         | 0.93(0.85,1.02)    | 1.25(0.79,1.97)         | 0.87(0.79,0.97)†                 | 1.17(0.98,1.41)      |
|                | 31 – 60 days      | 0.95(0.85,1.05)    | 1.37(0.82,2.29)         | 0.95(0.84,1.06)                  | 0.81(0.63,1.04)      |
|                | ≥ 61 days         | 1.07(1.04,1.09)‡   | 0.95(0.81,1.12)         | 1.07(1.04,1.10)‡                 | 1.02(0.96,1.08)      |
| AZM VS. NO AZM | ≤ 30 days         | 0.99(0.93,1.06)    | 1.15(0.82,1.63)         | 1.00(0.93,1.08)                  | 0.87(0.75,1.01)      |
|                | 31 – 60 days      | 0.90(0.84,0.98)†   | 0.99(0.65,1.49)         | 0.91(0.84,0.99)†                 | 0.95(0.81,1.11)      |
|                | ≥ 61 days         | 1.07(1.05,1.09)‡   | 1.02(0.91,1.15)         | 1.09(1.07,1.12)‡                 | 0.99(0.95,1.04)      |
| LEX VS. NO LEX | ≤ 30 days         | 1.31(1.22,1.41)‡   | 1.93(1.35,2.75)‡        | 1.19(1.09,1.29)‡                 | 1.79(1.56,2.06)‡     |
|                | 31 – 60 days      | 1.05(0.95,1.15)    | 1.14(0.66,1.96)         | 1.06(0.96,1.18)                  | 1.02(0.82,1.26)      |
|                | ≥ 61 days         | 1.08(1.05,1.11)‡   | 1.00(0.85,1.16)         | 1.07(1.05,1.10)‡                 | 1.15(1.09,1.21)‡     |
| LVX VS. NO LVX | ≤ 30 days         | 1.14(1.05,1.25)†   | 2.20(1.50,3.24)‡        | 1.16(1.06,1.28)†                 | 0.96(0.78,1.19)      |
|                | 31 – 60 days      | 1.09(0.98,1.21)    | 1.91(1.17,3.10)†        | 1.09(0.97,1.22)                  | 1.14(0.90,1.43)      |
|                | ≥ 61 days         | 1.02(1.00,1.05)    | 1.22(1.03,1.43)†        | 1.03(1.00,1.07)†                 | 0.97(0.91,1.03)      |
| CIP VS. NO CIP | ≤ 30 days         | 0.96(0.89,1.03)    | 1.06(0.70,1.60)         | 0.96(0.88,1.04)                  | 0.84(0.71,1.00)†     |
|                | 31 – 60 days      | 0.92(0.85,1.01)    | 1.02(0.63,1.67)         | 0.91(0.82,1.00)†                 | 0.95(0.78,1.14)      |
|                | ≥ 61 days         | 0.96(0.94,0.98)‡   | 1.16(1.02,1.32)†        | 0.96(0.94,0.99)†                 | 0.92(0.88,0.97)†     |
| MXF VS. NO MXF | ≤ 30 days         | 0.59(0.37,0.93)    | 0.97(0.15,6.24)         | 0.52(0.30,0.91)†                 | 0.76(0.33,1.77)      |
|                | 31 – 60 days      | 0.71(0.43,1.15)    | 0.00(0.00,0.00)         | 0.63(0.35,1.13)                  | 0.93(0.39,2.25)      |
|                | ≥ 61 days         | 0.99(0.93,1.06)    | 1.02(0.69,1.51)         | 0.99(0.92,1.06)                  | 1.10(0.95,1.27)      |
| FLQ VS. AMX    | ≤ 30 days         | 1.00(0.84,1.19)    | 1.49(0.69,3.19)         | 0.94(0.77,1.16)                  | 1.08(0.77,1.50)      |
|                | 31 – 60 days      | 0.95(0.79,1.15)    | 0.07(0.04,0.12)‡        | 0.94(0.75,1.17)                  | 0.92(0.65,1.31)      |
|                | ≥ 61 days         | 0.99(0.96,1.02)    | 1.14(0.94,1.40)         | 0.98(0.95,1.02)                  | 1.03(0.96,1.11)      |
| FLQ VS. AZM    | ≤ 30 days         | 0.87(0.73,1.03)    | 1.14(0.54,2.39)         | 0.83(0.68,1.02)                  | 0.98(0.70,1.37)      |
|                | 31 – 60 days      | 0.99(0.82,1.19)    | 0.06(0.04,0.09)‡        | 0.93(0.75,1.16)                  | 1.06(0.75,1.49)      |
|                | ≥ 61 days         | 0.93(0.90,0.96)‡   | 1.10(0.91,1.34)         | 0.91(0.88,0.94)‡                 | 1.00(0.93,1.08)      |
| FLQ VS. LEX    | ≤ 30 days         | 0.66(0.55,0.78)‡   | 0.68(0.32,1.42)         | 0.70(0.57,0.87)†                 | 0.47(0.34,0.66)‡     |
|                | 31 – 60 days      | 0.85(0.70,1.04)    | 0.05(0.03,0.09)‡        | 0.80(0.64,1.01)                  | 0.99(0.68,1.44)      |
|                | ≥ 61 days         | 0.92(0.89,0.95)‡   | 1.13(0.92,1.40)         | 0.92(0.89,0.96)‡                 | 0.86(0.80,0.93)‡     |
| FLQ VS. AMC    | ≤ 30 days         | 0.93(0.77,1.11)    | 1.05(0.48,2.32)         | 0.96(0.77,1.19)                  | 0.72(0.51,1.02)      |
|                | 31 – 60 days      | 0.94(0.77,1.15)    | 0.04(0.02,0.07)‡        | 0.90(0.72,1.14)                  | 1.24(0.83,1.86)      |

≥ 61 days

0.93(0.90,0.97)‡

1.19(0.95,1.49)

0.93(0.89,0.96)‡

0.98(0.90,1.06)

Abbreviations: HR, hazard ratio; CI, confidence interval; FLQ, fluoroquinolone; CIP, ciprofloxacin; LVX, levofloxacin; MXF, moxifloxacin; AMX, Amoxicillin; AMC, Amoxicillin Clavulanate; AZT, Azithromycin; LEX, Cephalexin.

‡ = P-value < 0.001

† = 0.001 ≤ P-value < 0.05

For peer review only

**Table 4. Pairwise Comparisons**

| Comparison  | Temporal Exposure | Any Tendon Rupture | Achilles Tendon Rupture | Complete Rupture of Rotator Cuff | Other Tendon Rupture |
|-------------|-------------------|--------------------|-------------------------|----------------------------------|----------------------|
|             |                   | HR(95% CI)         | HR(95% CI)              | HR(95% CI)                       | HR(95% CI)           |
| CIP VS. LVX | ≤ 30 days         | 0.84(0.75,0.94)†   | 0.48(0.27,0.86)†        | 0.82(0.73,0.94)†                 | 0.87(0.67,1.15)      |
| CIP VS. MXF | ≤ 30 days         | 1.63(1.02,2.61)†   | 1.08(0.16,7.29)         | 1.84(1.05,3.24)†                 | 1.10(0.47,2.60)      |
| LVX VS. MXF | ≤ 30 days         | 1.95(1.21,3.13)†   | 2.26(0.34,15.17)        | 2.24(1.27,3.94)†                 | 1.26(0.53,3.01)      |
| CIP VS. AMX | ≤ 30 days         | 1.11(1.01,1.23)†   | 1.20(0.66,2.16)         | 1.09(0.97,1.21)                  | 1.06(0.84,1.34)      |
| CIP VS. AZM | ≤ 30 days         | 0.97(0.87,1.06)    | 0.91(0.53,1.57)         | 0.96(0.86,1.07)                  | 0.96(0.77,1.21)      |
| CIP VS. LEX | ≤ 30 days         | 0.73(0.66,0.81)‡   | 0.55(0.31,0.95)†        | 0.81(0.72,0.91)‡                 | 0.47(0.37,0.59)‡     |
| CIP VS. AMC | ≤ 30 days         | 1.03(0.91,1.16)    | 0.84(0.46,1.56)         | 1.10(0.96,1.25)                  | 0.71(0.56,0.92)†     |
| LVX VS. AMX | ≤ 30 days         | 1.33(1.19,1.49)‡   | 2.50(1.45,4.29)†        | 1.32(1.16,1.49)‡                 | 1.22(0.93,1.59)      |
| LVX VS. AZM | ≤ 30 days         | 1.15(1.03,1.29)†   | 1.91(1.13,3.23)†        | 1.16(1.03,1.31)†                 | 1.10(0.84,1.44)      |
| LVX VS. LEX | ≤ 30 days         | 0.87(0.78,0.98)†   | 1.14(0.68,1.92)         | 0.98(0.86,1.12)                  | 0.54(0.41,0.69)‡     |
| LVX VS. AMC | ≤ 30 days         | 1.23(1.08,1.40)†   | 1.76(0.98,3.15)         | 1.33(1.15,1.54)‡                 | 0.82(0.62,1.08)      |
| MXF VS. AMX | ≤ 30 days         | 0.68(0.43,1.09)    | 1.10(0.16,7.41)         | 0.59(0.34,1.03)                  | 0.96(0.41,2.27)      |
| MXF VS. AZM | ≤ 30 days         | 0.59(0.37,0.94)†   | 0.84(0.13,5.65)         | 0.52(0.30,0.91)†                 | 0.88(0.37,2.07)      |
| MXF VS. LEX | ≤ 30 days         | 0.45(0.28,0.72)†   | 0.50(0.08,3.35)         | 0.44(0.25,0.77)†                 | 0.43(0.18,1.00)      |
| MXF VS. AMC | ≤ 30 days         | 0.63(0.39,1.01)    | 0.78(0.11,5.33)         | 0.60(0.34,1.05)                  | 0.65(0.28,1.53)      |
| FLQ VS. AMX | Overall           | 0.98(0.90,1.07)    | 0.49(0.36,0.68)‡        | 0.95(0.86,1.06)                  | 1.01(0.86,1.19)      |
| FLQ VS. AZM | Overall           | 0.93(0.85,1.01)    | 0.42(0.30,0.57)‡        | 0.89(0.80,0.98)†                 | 1.01(0.86,1.19)      |
| FLQ VS. LEX | Overall           | 0.80(0.73,0.88)‡   | 0.34(0.24,0.47)‡        | 0.80(0.72,0.89)‡                 | 0.74(0.62,0.88)‡     |
| FLQ VS. AMC | Overall           | 0.93(0.85,1.02)    | 0.37(0.26,0.52)‡        | 0.93(0.83,1.03)                  | 0.96(0.80,1.15)      |

Abbreviations: HR, hazard ratio, CI, confidence interval; FLQ, fluoroquinolone; CIP, ciprofloxacin; LVX, levofloxacin; MXF, moxifloxacin; AMX, Amoxicillin; AMC, Amoxicillin Clavulanate; AZT, Azithromycin; LEX, Cephalexin.

‡ = P-value < 0.001

† = 0.001 ≤ P-value < 0.05

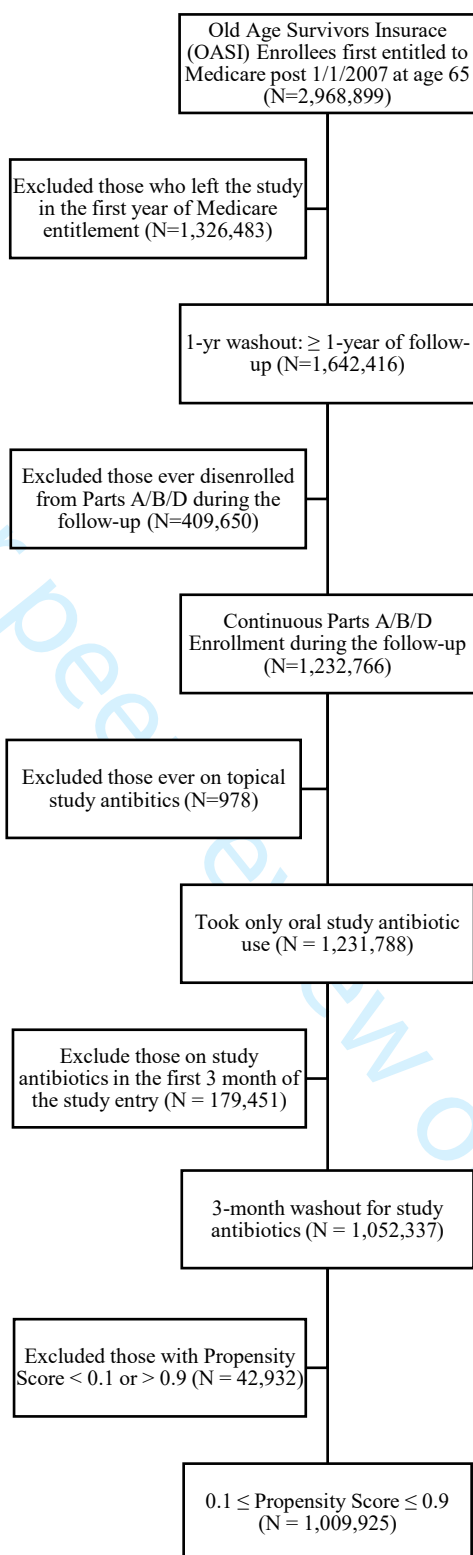

Supplementary Figure. Secular Trend of Study Antibiotic Use

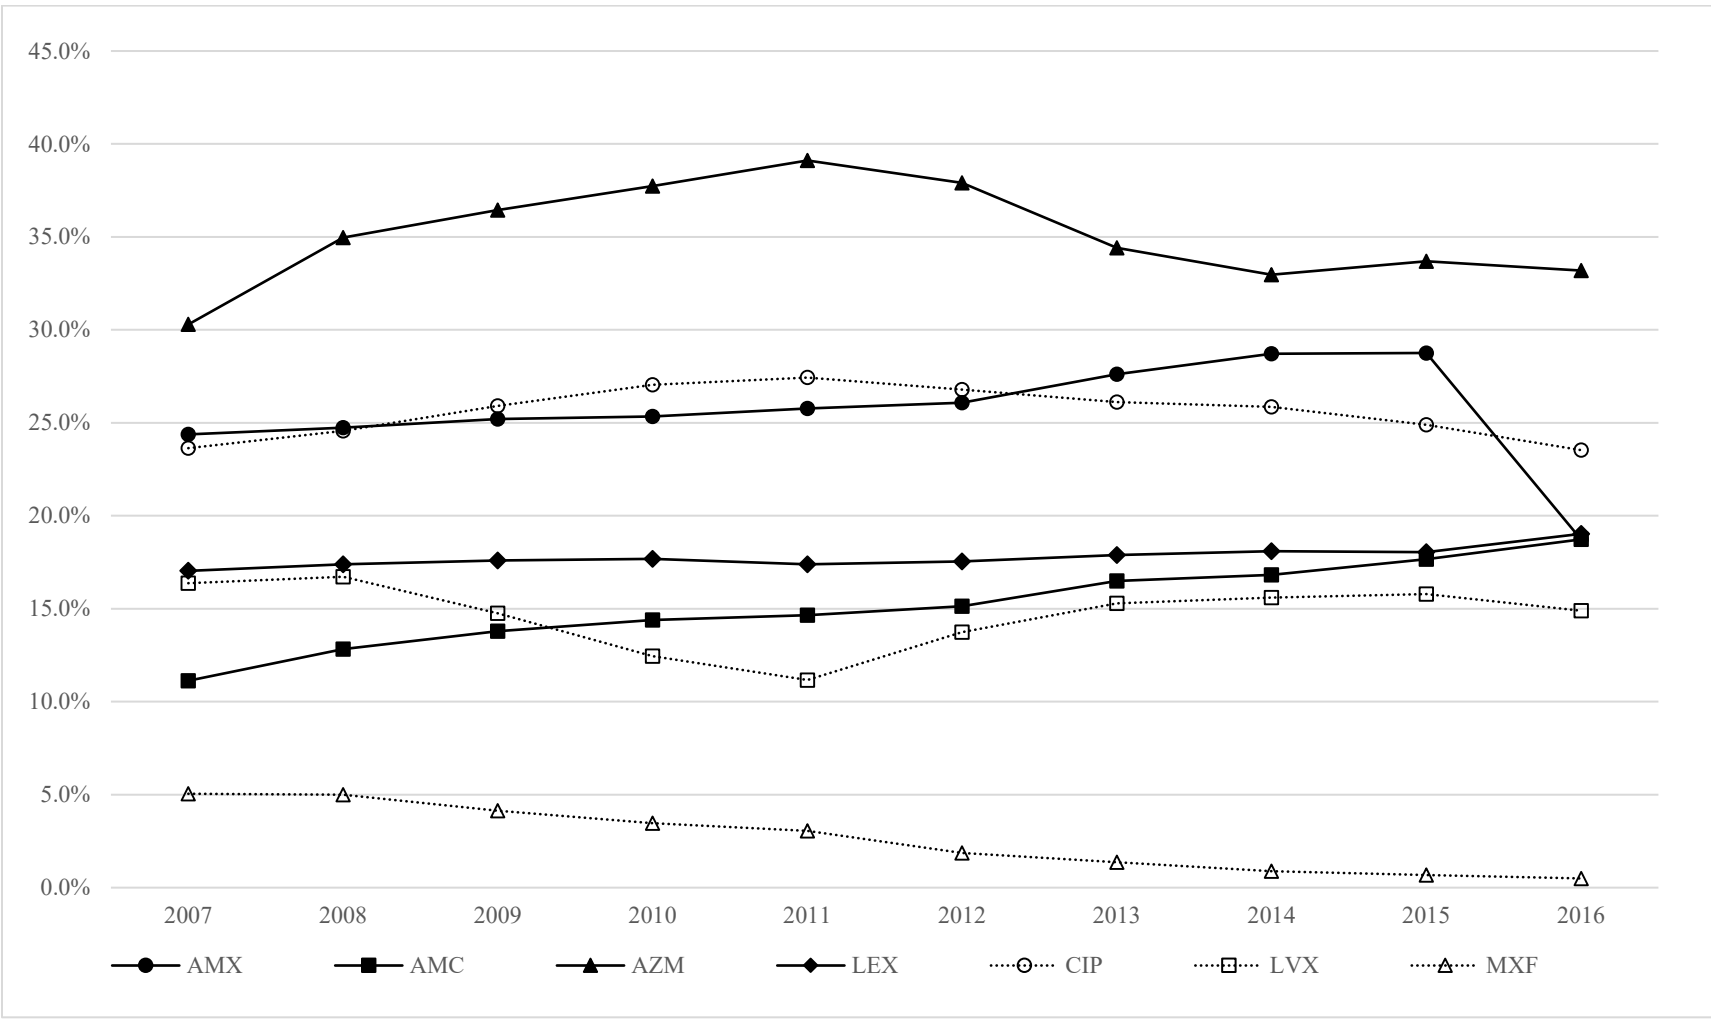

X-axis: Calendar year.

Y-axis: % of patients on each drug class.

STROBE Statement—Checklist of items that should be included in reports of *case-control studies*

|                              | Item No | Recommendation                                                                                                                                                                                    | Page No |
|------------------------------|---------|---------------------------------------------------------------------------------------------------------------------------------------------------------------------------------------------------|---------|
| <b>Title and abstract</b>    | 1       | (a) Indicate the study's design with a commonly used term in the title or the abstract                                                                                                            | 1       |
|                              |         | (b) Provide in the abstract an informative and balanced summary of what was done and what was found                                                                                               | 2       |
| <b>Introduction</b>          |         |                                                                                                                                                                                                   |         |
| Background/rationale         | 2       | Explain the scientific background and rationale for the investigation being reported                                                                                                              | 5       |
| Objectives                   | 3       | State specific objectives, including any prespecified hypotheses                                                                                                                                  | 5       |
| <b>Methods</b>               |         |                                                                                                                                                                                                   |         |
| Study design                 | 4       | Present key elements of study design early in the paper                                                                                                                                           | 6       |
| Setting                      | 5       | Describe the setting, locations, and relevant dates, including periods of recruitment, exposure, follow-up, and data collection                                                                   | 6       |
| Participants                 | 6       | (a) Give the eligibility criteria, and the sources and methods of case ascertainment and control selection. Give the rationale for the choice of cases and controls                               | 6       |
|                              |         | (b) For matched studies, give matching criteria and the number of controls per case                                                                                                               |         |
| Variables                    | 7       | Clearly define all outcomes, exposures, predictors, potential confounders, and effect modifiers. Give diagnostic criteria, if applicable                                                          | 7       |
| Data sources/<br>measurement | 8*      | For each variable of interest, give sources of data and details of methods of assessment (measurement). Describe comparability of assessment methods if there is more than one group              | 7       |
| Bias                         | 9       | Describe any efforts to address potential sources of bias                                                                                                                                         | 8-9     |
| Study size                   | 10      | Explain how the study size was arrived at                                                                                                                                                         | 6       |
| Quantitative variables       | 11      | Explain how quantitative variables were handled in the analyses. If applicable, describe which groupings were chosen and why                                                                      | 8       |
| Statistical methods          | 12      | (a) Describe all statistical methods, including those used to control for confounding                                                                                                             | 7-9     |
|                              |         | (b) Describe any methods used to examine subgroups and interactions                                                                                                                               | n/a     |
|                              |         | (c) Explain how missing data were addressed                                                                                                                                                       | n/a     |
|                              |         | (d) If applicable, explain how matching of cases and controls was addressed                                                                                                                       | n/a     |
|                              |         | (e) Describe any sensitivity analyses                                                                                                                                                             | n/a     |
| <b>Results</b>               |         |                                                                                                                                                                                                   |         |
| Participants                 | 13*     | (a) Report numbers of individuals at each stage of study—eg numbers potentially eligible, examined for eligibility, confirmed eligible, included in the study, completing follow-up, and analysed | 9       |
|                              |         | (b) Give reasons for non-participation at each stage                                                                                                                                              | 9       |
|                              |         | (c) Consider use of a flow diagram                                                                                                                                                                | 9       |
| Descriptive data             | 14*     | (a) Give characteristics of study participants (eg demographic, clinical, social) and information on exposures and potential confounders                                                          | 9-10    |
|                              |         | (b) Indicate number of participants with missing data for each variable of interest                                                                                                               | n/a     |
| Outcome data                 | 15*     | Report numbers in each exposure category, or summary measures of exposure                                                                                                                         | 10      |

|    |                          |    |                                                                                                                                                                                                              |
|----|--------------------------|----|--------------------------------------------------------------------------------------------------------------------------------------------------------------------------------------------------------------|
| 1  |                          |    |                                                                                                                                                                                                              |
| 2  |                          |    |                                                                                                                                                                                                              |
| 3  | Main results             | 16 | (a) Give unadjusted estimates and, if applicable, confounder-adjusted estimates and their precision (eg, 95% confidence interval). Make clear which confounders were adjusted for and why they were included |
| 4  |                          |    | 11-14                                                                                                                                                                                                        |
| 5  |                          |    |                                                                                                                                                                                                              |
| 6  |                          |    |                                                                                                                                                                                                              |
| 7  |                          |    |                                                                                                                                                                                                              |
| 8  |                          |    |                                                                                                                                                                                                              |
| 9  |                          |    |                                                                                                                                                                                                              |
| 10 |                          |    |                                                                                                                                                                                                              |
| 11 |                          |    |                                                                                                                                                                                                              |
| 12 |                          |    |                                                                                                                                                                                                              |
| 13 |                          |    |                                                                                                                                                                                                              |
| 14 |                          |    |                                                                                                                                                                                                              |
| 15 |                          |    |                                                                                                                                                                                                              |
| 16 |                          |    |                                                                                                                                                                                                              |
| 17 |                          |    |                                                                                                                                                                                                              |
| 18 |                          |    |                                                                                                                                                                                                              |
| 19 |                          |    |                                                                                                                                                                                                              |
| 20 |                          |    |                                                                                                                                                                                                              |
| 21 |                          |    |                                                                                                                                                                                                              |
| 22 |                          |    |                                                                                                                                                                                                              |
| 23 |                          |    |                                                                                                                                                                                                              |
| 24 |                          |    |                                                                                                                                                                                                              |
| 25 |                          |    |                                                                                                                                                                                                              |
| 26 |                          |    |                                                                                                                                                                                                              |
| 27 |                          |    |                                                                                                                                                                                                              |
| 28 |                          |    |                                                                                                                                                                                                              |
| 29 |                          |    |                                                                                                                                                                                                              |
| 30 |                          |    |                                                                                                                                                                                                              |
| 31 |                          |    |                                                                                                                                                                                                              |
| 32 |                          |    |                                                                                                                                                                                                              |
| 33 |                          |    |                                                                                                                                                                                                              |
| 34 |                          |    |                                                                                                                                                                                                              |
| 35 |                          |    |                                                                                                                                                                                                              |
| 36 |                          |    |                                                                                                                                                                                                              |
| 37 |                          |    |                                                                                                                                                                                                              |
| 38 |                          |    |                                                                                                                                                                                                              |
| 39 |                          |    |                                                                                                                                                                                                              |
| 40 |                          |    |                                                                                                                                                                                                              |
| 41 |                          |    |                                                                                                                                                                                                              |
| 42 |                          |    |                                                                                                                                                                                                              |
| 43 |                          |    |                                                                                                                                                                                                              |
| 44 |                          |    |                                                                                                                                                                                                              |
| 45 |                          |    |                                                                                                                                                                                                              |
| 46 |                          |    |                                                                                                                                                                                                              |
| 47 |                          |    |                                                                                                                                                                                                              |
| 48 |                          |    |                                                                                                                                                                                                              |
| 49 |                          |    |                                                                                                                                                                                                              |
| 50 |                          |    |                                                                                                                                                                                                              |
| 51 |                          |    |                                                                                                                                                                                                              |
| 52 |                          |    |                                                                                                                                                                                                              |
| 53 |                          |    |                                                                                                                                                                                                              |
| 54 |                          |    |                                                                                                                                                                                                              |
| 55 |                          |    |                                                                                                                                                                                                              |
| 56 |                          |    |                                                                                                                                                                                                              |
| 57 |                          |    |                                                                                                                                                                                                              |
| 58 |                          |    |                                                                                                                                                                                                              |
| 59 |                          |    |                                                                                                                                                                                                              |
| 60 |                          |    |                                                                                                                                                                                                              |
|    | <b>Discussion</b>        |    |                                                                                                                                                                                                              |
|    | Key results              | 18 | Summarise key results with reference to study objectives                                                                                                                                                     |
|    | Limitations              | 19 | Discuss limitations of the study, taking into account sources of potential bias or imprecision. Discuss both direction and magnitude of any potential bias                                                   |
|    | Interpretation           | 20 | Give a cautious overall interpretation of results considering objectives, limitations, multiplicity of analyses, results from similar studies, and other relevant evidence                                   |
|    | Generalisability         | 21 | Discuss the generalisability (external validity) of the study results                                                                                                                                        |
|    | <b>Other information</b> |    |                                                                                                                                                                                                              |
|    | Funding                  | 22 | Give the source of funding and the role of the funders for the present study and, if applicable, for the original study on which the present article is based                                                |
|    |                          |    | 18                                                                                                                                                                                                           |

\*Give information separately for cases and controls.

**Note:** An Explanation and Elaboration article discusses each checklist item and gives methodological background and published examples of transparent reporting. The STROBE checklist is best used in conjunction with this article (freely available on the Web sites of PLoS Medicine at <http://www.plosmedicine.org/>, Annals of Internal Medicine at <http://www.annals.org/>, and Epidemiology at <http://www.epidem.com/>). Information on the STROBE Initiative is available at <http://www.strobe-statement.org>.

# BMJ Open

## The association between Tendon Ruptures and Use of Fluoroquinolone, and other oral antibiotics: A 10-year Retrospective Study of 1 million U.S. senior Medicare beneficiaries

|                                 |                                                                                                                                                                                 |
|---------------------------------|---------------------------------------------------------------------------------------------------------------------------------------------------------------------------------|
| Journal:                        | <i>BMJ Open</i>                                                                                                                                                                 |
| Manuscript ID                   | bmjopen-2019-034844.R2                                                                                                                                                          |
| Article Type:                   | Original research                                                                                                                                                               |
| Date Submitted by the Author:   | 29-Jul-2020                                                                                                                                                                     |
| Complete List of Authors:       | Baik, Seo; National Library of Medicine, Lau, Jason; National Library of Medicine Huser, Vojtech ; National Library of Medicine McDonald, Clement; National Library of Medicine |
| <b>Primary Subject Heading</b>: | Epidemiology                                                                                                                                                                    |
| Secondary Subject Heading:      | General practice / Family practice, Pharmacology and therapeutics                                                                                                               |
| Keywords:                       | CLINICAL PHARMACOLOGY, EPIDEMIOLOGY, ORAL MEDICINE, Musculoskeletal disorders < ORTHOPAEDIC & TRAUMA SURGERY, ACCIDENT & EMERGENCY MEDICINE                                     |
|                                 |                                                                                                                                                                                 |

SCHOLARONE™  
Manuscripts





I, the Submitting Author has the right to grant and does grant on behalf of all authors of the Work (as defined in the below author licence), an exclusive licence and/or a non-exclusive licence for contributions from authors who are: i) UK Crown employees; ii) where BMJ has agreed a CC-BY licence shall apply, and/or iii) in accordance with the terms applicable for US Federal Government officers or employees acting as part of their official duties; on a worldwide, perpetual, irrevocable, royalty-free basis to BMJ Publishing Group Ltd ("BMJ") its licensees and where the relevant Journal is co-owned by BMJ to the co-owners of the Journal, to publish the Work in this journal and any other BMJ products and to exploit all rights, as set out in our [licence](#).

The Submitting Author accepts and understands that any supply made under these terms is made by BMJ to the Submitting Author unless you are acting as an employee on behalf of your employer or a postgraduate student of an affiliated institution which is paying any applicable article publishing charge ("APC") for Open Access articles. Where the Submitting Author wishes to make the Work available on an Open Access basis (and intends to pay the relevant APC), the terms of reuse of such Open Access shall be governed by a Creative Commons licence – details of these licences and which [Creative Commons](#) licence will apply to this Work are set out in our licence referred to above.

Other than as permitted in any relevant BMJ Author's Self Archiving Policies, I confirm this Work has not been accepted for publication elsewhere, is not being considered for publication elsewhere and does not duplicate material already published. I confirm all authors consent to publication of this Work and authorise the granting of this licence.

1  
2  
3  
4 **The association between Tendon Ruptures and Use of Fluoroquinolone, and other oral**  
5 **antibiotics: A 10-year Retrospective Study of 1 million U.S. senior Medicare beneficiaries**  
6  
7  
8  
9

10  
11 **Seo Baik<sup>1</sup>, PhD, Jason J. Lau<sup>2</sup>, MD, Vojtech Huser<sup>1</sup>, MD, PhD, Clement J. McDonald<sup>1</sup>, MD**  
12  
13

14  
15  
16 Author Affiliations  
17

- 18 1. Lister Hill National Center for Biomedical Communications, National Library of  
19 Medicine, U.S. National Institutes of Health, Bethesda, Maryland, USA (Drs. Baik,  
20 Huser and McDonald)  
21  
22 2. Department of Pediatric, UC Davis Health, Sacramento, California (Dr. Lau)  
23  
24  
25  
26  
27  
28  
29

30 Address reprint request to Dr. McDonald (corresponding author) at Lister Hill National Center  
31 for Biomedical Communications, National Library of Medicine, U.S. National Institutes of  
32 Health, 8600 Rockville Pike, Building 38A, Room 07N710, Bethesda, Maryland 20894, USA  
33  
34  
35

36 Telephone: +1 (301) 496-4441  
37

38 E-mail: ClemMcDonald@mail.nih.gov  
39  
40  
41  
42  
43  
44  
45

46 **3957 Words (4000 MAX)**  
47  
48  
49  
50  
51  
52  
53  
54  
55  
56  
57

1  
2  
3 **Abstract (Max 300 words, 286 now)**  
4

5 **Objectives:** To assess the association of fluoroquinolone use with tendon ruptures  
6 compared to no fluoroquinolone and that of the four most commonly prescribed non-  
7 fluoroquinolone antibiotics in the US.  
8  
9  
10  
11  
12  
13

14 **Design:** Retrospective observational study.  
15

16 **Setting:** U.S. senior enrolled in the federal old-age, survivor's insurance program.  
17

18 **Participants:** 1,009,925 Medicare fee-for-service beneficiaries and their inpatient,  
19 outpatient, prescription drug records were used.  
20  
21  
22

23 **Interventions:** Seven oral antibiotics, fluoroquinolones (ciprofloxacin, levofloxacin,  
24 moxifloxacin) and amoxicillin, amoxicillin-clavulanate, azithromycin and cephalexin.  
25  
26  
27

28 **Primary and Secondary Outcome measures:** All tendon ruptures combined, and three  
29 types of tendon ruptures by anatomic site, Achilles tendon rupture, rupture of rotator cuff  
30 and tendon ruptures on other anatomic sites.  
31  
32  
33

34 **Results:** Of three fluoroquinolones, only levofloxacin exhibited a significant increased  
35 risk of tendon ruptures - 16%, and 120% for rotator cuff and Achilles tendon rupture  
36 respectively in the  $\leq 30$  day window. Ciprofloxacin and moxifloxacin exhibited little to no  
37 increased risk of tendon ruptures. Notably, the risk of levofloxacin never exceeded the  
38 risk of the non-fluoroquinolone, cephalexin in any comparison.  
39  
40  
41  
42  
43  
44  
45

46  
47 Among the non-fluoroquinolone antibiotics, amoxicillin, amoxicillin-clavulanate, and  
48 azithromycin exhibited none to benign risk of tendon rupture. Cephalexin exhibited  
49 modest to large *increased* risk of tendon rupture at  $\leq 30$  day window across all anatomic  
50 rupture sites.  
51  
52  
53  
54  
55  
56  
57

1  
2  
3 **Conclusions:** In our study, fluoroquinolones as a class were not associated with the  
4 increased risk of tendon ruptures. Neither ciprofloxacin nor moxifloxacin exhibited any  
5 risk for tendon ruptures. Levofloxacin did exhibit significant increased risk. Cephalexin  
6 with no reported effect on metalloprotease activity had an equal or greater risk than  
7 levofloxacin; so we question whether metalloprotease activity has any relevance to  
8 observed associations with tendon rupture. Confounding by indication bias may be more  
9 relevant and should be given more consideration as explanation for significant  
10 associations in observational studies of tendon rupture.  
11  
12  
13  
14  
15  
16  
17  
18  
19  
20  
21  
22  
23  
24  
25  
26  
27  
28  
29  
30  
31  
32  
33  
34  
35  
36  
37  
38  
39  
40  
41  
42  
43  
44  
45  
46  
47  
48  
49  
50  
51  
52  
53  
54  
55  
56  
57  
58  
59  
60

### Strengths and limitations of this study

- We conducted a large (more than 1 million US senior subjects) retrospective study of outpatient prescription drug records to assess the association between the use of fluoroquinolones and the occurrence of tendon ruptures compared to the most commonly used non-fluoroquinolone oral antibiotics.
- Our study included all oral fluoroquinolones (ciprofloxacin, levofloxacin, moxifloxacin) prescribed in the US and the four most commonly prescribed non-fluoroquinolone antibiotics: amoxicillin, amoxicillin-clavulanate, azithromycin and cephalexin as controls.
- In addition to reporting the risk of any tendon rupture, we also reported the risk of three types of tendon ruptures by anatomic site 1) Achilles tendon rupture, 2) rupture of rotator cuff and 3) tendon ruptures on other anatomic sites as separate outcomes.
- This study is possibly only applicable to U.S. senior, aged 65 or more, Medicare fee-for-service beneficiaries.
- We had no options to verify claims diagnoses via chart review.

## Introduction

Fluoroquinolones (FQ) are among the most widely prescribed antibiotics in the outpatient setting[1,2] due to their broad spectrum treatment of bacteria found in respiratory, urinary, joint, and skin infections. Several observational studies have reported the association between the use of FQs and tendinitis and tendon rupture (TR), especially of the Achilles tendon[3–12] and the U.S. Food and Drug Administration (FDA) issued black box warnings to FQ antibiotics beginning in 2008.[13] The warning was updated in 2016 to recommend using alternative antibiotics when possible.[14,15] The fact that FQs upregulate the production of metalloproteinase enzymes with collagenase activity that could weaken tendons is taken as a mechanism to explain this reported risk.[16–18]

Studies that reported association between FQ use and TR used one or more other antibiotics as controls. One study compared the FQ rupture rates with patients using azithromycin, the most frequently used oral antibiotic in the US. Only two focused principally on TR risk among the elderly. None compared TR rates of *FQs* with those of cephalexin -- the 3rd most commonly prescribed oral antibiotic in the US.

The Virtual Research Data Center (VRDC) of Center for Medicare and Medicaid Services (CMS)[19] carries more than 10 years of Medicare claims, which include information about the usage of prescription drugs and encounter diagnoses (including tendon ruptures). It also carries information about 42 major chronic conditions, demographic characteristic and vital status. We conducted a large observational study using the VRDC to assess the association of FQ antibiotics with TR compared to that of

1  
2  
3 the four most commonly prescribed non-FQ antibiotics in the US. Here we report the  
4  
5 results of that analysis.  
6  
7  
8  
9

## 10 **Methods**

### 11 *Patient and public involvement*

12  
13  
14 Neither patients nor the public were not involved in the design of the study.  
15  
16  
17

### 18 *Study population*

19  
20 We derived our study population from a 20% random sample of Medicare prescription  
21  
22 drug coverage (Part D) enrollees who first enrolled in the Medicare under old age and  
23  
24 survivors insurance within a month of age 65 (779-781 month-old) and on or after  
25  
26 1/1/2007 - the first full year of Part D prescriptions availability. We included claim data  
27  
28 through 12/31/2016, the end of VRDC claim data available to us. All of the VRDC data  
29  
30 is de-identified and researchers must perform all of their analysis within the VRDC  
31  
32 computer systems, and can only pull statistical results from it.[19] We obtained approvals  
33  
34 for these studies from the Office of Human Research Protection at the National Institutes  
35  
36 of Health as not human subject studies.  
37  
38  
39  
40  
41  
42  
43

44 We required subjects to be continuously enrolled in hospital insurance (Part A) and  
45  
46 medical insurance (Part B) to assure we had full outpatient and inpatient claims data,  
47  
48 which are not available for nearly 20% of subjects with Part D only.[20] To obtain a  
49  
50 cohort of new TR patients, we excluded individuals with TRs recorded in the first year of  
51  
52 their Medicare entitlement.[21] In order to assure sufficient follow-up, we excluded  
53  
54  
55  
56  
57  
58  
59  
60

1  
2  
3 individuals with less than 1-year follow-up. Moreover, to obtain incident (or new) drug  
4 user cohort, we excluded individuals who were prescribed any study antibiotics during  
5 their first 3-month after Part D enrollment, while ignoring the data during the same time  
6 window for individuals not taking study antibiotics. By doing so, we minimize survivor  
7 bias from a prevalent users (Figure 1 Consort Diagram).  
8  
9  
10  
11  
12  
13

### 14 15 16 17 Primary Outcome

18 We identified patients with TR based upon International Classification of Diseases  
19 (ICD)-9-CM codes of 726.13, 727.60-727.69, and ICD-10-CM codes of M66.2, M66.3,  
20 M66.8, M66.9, and M75.1. We combined all TRs and reported them as one outcome, and  
21 report three types of TRs by anatomic site 1) Achilles tendon rupture, 2) rupture of  
22 rotator cuff and 3) TRs on other anatomic sites as separate outcomes. We focused on  
23 Achilles TR because it was the sole focus of many prior studies and on rotator cuff TR  
24 because it is the predominant TR of the elderly. We lumped the remaining as “other  
25 TRs”.  
26  
27  
28  
29  
30  
31  
32  
33  
34  
35  
36  
37  
38  
39

### 40 Study antibiotics

41 We included a total of seven study antibiotics prescribed in the US including all three  
42 oral FQs (moxifloxacin (MXF), ciprofloxacin (CIP), levofloxacin (LVX), the active  
43 stereoisomer of ofloxacin) and the four most frequently prescribed non-FQ oral  
44 antibiotics (amoxicillin (AMX), amoxicillin clavulanate (AMC), azithromycin (AZT) and  
45 cephalexin (LEX)) as a control. Ciprofloxacin and the four non-FQ, study antibiotics  
46 were the five most frequently used U.S. oral antibiotics in 2011.  
47  
48  
49  
50  
51  
52  
53  
54  
55  
56  
57  
58  
59  
60



### Statistical Analysis

We analyzed each of the four TR outcomes in separate Fine-Gray competing risk regression analyses with death as the competing risk.[22,23] Individuals became eligible for “the study” at their Medicare enrollment but prescription data did not become available until their Part D enrollment. We followed them from their entry in Part D (while accounting for left truncation[24]) until their first diagnosis of TR, death, switch to a capitated plan, disenrollment from Medicare or 12/31/2016 – whichever came first. In each regression analysis, we included the seven antibiotics whose effects on TR were our primary interest. We adjusted hazard ratio (HR) of each study antibiotic for concurrent use of the other study antibiotics. We also adjusted for calendar year of individual’s Part D entry, to account for secular trends, and their socio-demographic characteristics of gender, race, rural residency (Yes/No) and income status. We inferred individual’s income level from the monthly indicators of dual-eligibility and Low Income Subsidy (LIS) status, which separate subjects into three groups; 1) dual whose income is below 135% Federal Poverty Line (FPL); 2) non-dual LIS whose income is between 135 and 150% FPL; and 3) non-dual no LIS whose income is above 150% FPL, respectively. We used this variable in the analysis as a surrogate for economic status.[25] We also included the 42 chronic conditions within the Medicare Master Beneficiary Summary File [26] that had >1% prevalence as measures of overall health. We assumed that patients were on a given study drug from the prescription dispensing date to the end of days of supply. We did not distinguish between different brands of a study drugs. Following the approach of prior studies,[3–5] we separated subjects by temporal exposure within each study drug,

1  
2  
3 including groups for never exposed, exposed within 30 days, 31-60 days, and >60 days of  
4 the index (or TR event) time. Thus, by this approach we could detect the presumed short  
5 term action of the FQ's on tendons and avoid the risk of non-differential misclassification  
6 that can occur with too simple (yes/no) drug exposure measures.[27] In order to minimize  
7 the immortal time bias, we treated all drug usage measures and all socio-demographic  
8 characteristics, except gender, race and rural residency, as time-varying  
9 covariates.[28,29] In order to mitigate selection bias toward use of any study antibiotics,  
10 we employed a propensity score (PS) approach.[30,31] We first derived a PS of taking  
11 any of study antibiotics as a function of individual's characteristics at the time of the first  
12 antibiotic use after Part D entry from a multiple logistic regression. We used the median  
13 days to the first study antibiotic use in patients taking study antibiotics as the cutoff time  
14 for individuals not taking study antibiotics. We performed our analyses with an inverse  
15 propensity score weight (IPSW) excluding individuals with the PS below 0.1 and above  
16 0.9, to mitigate poorer performance in the presence of a strong treatment-selection  
17 process.[32] In post-hoc analyses, we also compared the risk of TR of each study  
18 antibiotics to that of every other study antibiotic on a pairwise basis.

## 41 42 **Results**

### 43 Study population and Secular trend

44 From our 20% sample of Part D enrollees, 1,009,925 individuals satisfied all our  
45 selection criteria including the washout of individuals with any antibiotic use in their first  
46 3-month of Part D enrollment (Figure 1 Consort Diagram). Follow-up began with an  
47 individual's enrollment in Part D program (median (IQR) 0 (0-122) days from the  
48  
49  
50  
51  
52  
53  
54  
55  
56  
57  
58  
59  
60

1  
2  
3 Medicare entitlement). We followed them for a median of 3.6 years (total 4,030,897  
4 patient-years) until their first diagnosis of TR (3.5%), death (4.6%), switch to a capitated  
5 plan (12.6%), disenrollment from Medicare (<1%) or study end on 12/31/2016 (79.3%),  
6 whichever came first. Patients had their first post enrollment claim with a diagnosis of  
7 TR at a median age of 68.5 (IQR 67.2-70.4). The proportions of non-Hispanic White,  
8 female and rural residents were 80.7%, 57.0%, and 22.6% respectively. About a fifth of  
9 individuals received federal/state subsidies, i.e. Medicaid coverage on top of Medicare  
10 (dual 16.1%) or assistance in paying their Part D premium and coinsurance/copayment  
11 (non-dual LIS 2.7%). Among the 42 Medicare chronic conditions, hypertension (67.3%),  
12 hyperlipidemia (68.4%), cataract (46.4%), rheumatoid arthritis/osteoarthritis (36.6%),  
13 anemia (30.4%), ischemic heart disease (26.2%), and chronic kidney disease (17.9%)  
14 were the seven most prevalent (Table 1).  
15  
16  
17  
18  
19  
20  
21  
22  
23  
24  
25  
26  
27  
28  
29  
30  
31  
32

33 Of the 328,654 (33.0%) patients who ever took an FQ, 71.5%, 47.5% and 4.5% had taken  
34 CIP, LVX and MXF respectively. Of 576,885 (57.1%) of patients who ever took a non-  
35 FQ antibiotic, the figures were 53.6%, 44.9%, 33.9% and 31.1% for AZM, AMX, LEX,  
36 and AMC, respectively. Patients who took one or more study antibiotics took a median  
37 (IQR) of 3.0 (1.0-6.0) study antibiotic prescriptions and took a median (IQR) 2.0 (1.0-  
38 3.0) different study antibiotics during the observation period. About 2.5% patients who  
39 took one or more study antibiotics took one or more such antibiotics at the same time.  
40  
41  
42  
43  
44  
45  
46  
47  
48

49 Secular trends in study antibiotics usage existed. MXF usage declined precipitously from  
50 5.0% in 2007 to almost zero in 2016 – overweighting the MXF statistics for early entrants  
51 into Medicare and yielding a longer mean follow-up time. CIP use hit a peak, and LVX, a  
52  
53  
54  
55  
56  
57  
58  
59  
60

1  
2  
3 nadir, in 2011. The use of AMX, AMC and LEX trended slowly upward (Supplementary  
4  
5 Figure 1). The mode (median) of supply durations for each antibiotics were short--10 (7)  
6  
7 for AMX, 10 (10) for AMC, 5 (5) for AZM, 10 (7) for LEX, 7 (7) for CIP, 10 (7) for  
8  
9 LVX, 10 (11) for MXF. About 35% of individuals were never exposed to any of the  
10  
11 study antibiotics during the study period.  
12  
13  
14  
15

16  
17 Unadjusted figures for TR prevalence across each of the seven study antibiotic users and  
18  
19 the no study antibiotic users ranged from a high of 5.2% for MXF to a low of 2.9% for no  
20  
21 antibiotic (Table 1). Except for MXF, the *unadjusted* prevalence of TRs associated with  
22  
23 each non-FQ antibiotic was *greater than* or equal to that of each FQ antibiotic. The TR  
24  
25 rates per 1000 patient-years followed the same pattern, with the non-FQ antibiotics  
26  
27 topping the rates of all FQs except MXF (with the highest rate), possibly due to  
28  
29 overweighting of MXF usage in the early years of the study. Patients who ever took an  
30  
31 FQ had the highest unadjusted rate of death per 1000 person-years. LVX's death rate was  
32  
33 nearly twice the rate of each non-FQ antibiotics. The size of the associations with  
34  
35 conditions like diabetes, chronic renal failure and heart failure paralleled the magnitude  
36  
37 of the death rates and was generally higher with FQs than non-FQ antibiotics (Table 1).  
38  
39  
40  
41  
42  
43  
44

#### 45 Primary Analysis

46  
47 Table 2 presents HRs for all non-antibiotic covariates in our Fine-Gray competing risk  
48  
49 regression with IPSW. For simplicity sake, in Table 2, we report the HRs of all anatomic  
50  
51 types of tendon ruptures taken together. Being a female (vs. male), African-American,  
52  
53 Hispanic, and Asian (vs. white), being dual or non-dual LIS (vs. non-dual no LIS) and  
54  
55  
56  
57  
58  
59  
60

1  
2  
3 living in a rural area were all associated with a *reduced* risk of tendon rupture. These risk  
4  
5 reductions were 24% or more for all but Hispanics and rural residency covariates, and the  
6  
7 reductions were similar across all anatomic sites. In general, life-threatening chronic  
8  
9 conditions, such as AMI, COPD, heart failure and colorectal/lung/endometrial cancers  
10  
11 were associated with a lower risk of TR in a range of 15-60% below control possibly due  
12  
13 to constrained physical activity and/or shortened life span. Notably, diabetes and chronic  
14  
15 renal disease, previously reported as risk factors for TR,[33,34] exhibited no increased  
16  
17 TR risk. Mobility impairments had reduced risk of TR similar to that of the severe life-  
18  
19 threatening conditions, likely due to reduced activity. Most conditions with low life  
20  
21 threatening conditions, likely due to reduced activity. Most conditions with low life  
22  
23 threats such as cataract, glaucoma, depression, asthma, hyperlipidemia, hypertension,  
24  
25 prostatic hyperplasia, migraine/other chronic headache, and deafness/hearing impairment  
26  
27 exhibited risks of 8 to 34% *above* controls probably for reasons related to longer life  
28  
29 spans and less inhibited activity. Ischemic heart did not fit the mold of sicker equals  
30  
31 lower TR risk. Patients with rheumatoid arthritis/osteoarthritis were a special case and  
32  
33 had TR risk of 184% *above* control possibly due to joint and associated tendon  
34  
35 inflammation with these disorders. Fibromyalgia/chronic pain and fatigue also exhibited  
36  
37 a 39% increased risk of TR possibly also due to an inflammatory component.  
38  
39  
40  
41  
42

43 The Achilles tendon carries the full force of the extra weight carried by obese patients  
44  
45 and obesity was associated with a significant (13%) increase in Achilles TR ruptures  
46  
47 while its effect on other TR classes was significant but miniscule (2-3%) (Data not  
48  
49 shown).  
50  
51

### 52 53 ***Effect of antibiotics*** 54 55 56 57

1  
2  
3 We report HRs from our primary analysis in tables separate from the non-antibiotic  
4 covariates. Table 3 shows the risk associated with each study antibiotic broken down by  
5 time lag between the antibiotic use and the TRs (separate rows), and by all TRs together  
6 and separately by anatomic sites (in columns). We also report HRs of death (competing  
7 risk). We used multiplicity corrected p-values to simultaneously test the difference of  
8 pairs of antibiotics to minimize the chance of finding statistically significant difference  
9 by random chance.[35] Of the total 34,880 patients with any TR occurrence, complete  
10 rupture of rotator cuff represented the major share (80.5%), followed by other TRs  
11 (16.9%) and Achilles TR (2.6%). In the survival analysis, we followed patients until the  
12 first occurrence of TR; so, these figures count only the first TR occurrence independent  
13 of anatomic site.  
14  
15  
16  
17  
18  
19  
20  
21  
22  
23  
24  
25  
26  
27  
28

29 Of the non-FQ antibiotics, AMX exhibited a reduced risk of TR compared to no AMX in  
30 every tendon class and time window, similar to its low risk in previous studies. It  
31 exhibited a significantly lower risk in the  $\leq 30$ -day window except for the Achilles  
32 tendon. AZM and AMC exhibited a similar benign risk in all time windows except for  
33 TR of rotator cuff in  $>60$ -day window. LEX was the surprise non-FQ antibiotic. It  
34 exhibited modest to large *increased* TR risk at  $\leq 30$ -day window across all sites ranging  
35 from a low of 19% increase for complete rupture of rotator cuff to a high 93% increase  
36 for Achilles TR. Its risk was also significantly higher at  $\leq 30$ -day window for all TRs  
37 taken together.  
38  
39  
40  
41  
42  
43  
44  
45  
46  
47  
48  
49  
50

51 Of the FQs, CIP and MXF, the most and least frequently prescribed FQ, exhibited little to  
52 no increased risk of TR within each anatomic site and each time frame. LVX is the only  
53 FQ to exhibit a significant *increase* in TR risk - of 16%, and 120% for rupture of rotator  
54  
55  
56  
57  
58  
59  
60

1  
2  
3 cuff and Achilles TR respectively in the  $\leq 30$ -day window. Notably, the risk of LVX  
4  
5 never exceeded the risk of the non-FQ, LEX in any comparison.  
6  
7

8  
9 In a post-hoc analysis (Table 4), we compared the TR risk of each antibiotic with every  
10  
11 other antibiotic (pairwise comparisons of FQ vs. FQ and FQ vs. non-FQ), for  $\leq 30$ -day  
12  
13 window and FQs as a class vs. each non-FQ after combining the data from the three time  
14  
15 windows. These results paralleled the above-mentioned risk for each study antibiotic in  
16  
17 Table 3. Again, TR risk for LVX was greater than that of CIP, MXF, AMC, AMX, and  
18  
19 AZM in a  $\leq 30$ -day window. However, LVX risk was comparable to that of LEX for  
20  
21 Achilles TR, and rupture of rotator cuff and significantly lower than LEX for the other  
22  
23 TR classes. When comparing the risk of FQs as a class against that of non-FQ antibiotics,  
24  
25 most of the non-FQ antibiotics had significantly greater risk than the FQ class as a whole  
26  
27 across all TR sites (See last 4 rows of Table 4).  
28  
29  
30  
31

32  
33 In another analysis evaluating risk of death for each antibiotics, each FQ antibiotic  
34  
35 exhibited a significant increase in death risk of – 46% (for CIP), 105% (for MXF) and  
36  
37 119% (for LVX) in a  $\leq 30$ -day window. Among non-FQ antibiotics, only AMC exhibited  
38  
39 37% increased risk of death in a  $\leq 30$ -day window. Overall, risk of death for FQs as a  
40  
41 class far outweighed that of each non-FQ antibiotics.  
42  
43  
44  
45  
46  
47

## 48 **Discussion**

49  
50 Our results conflict with the common assertion that the Achilles tendon rupture is the  
51  
52 most common tendon rupture (up to 90% in one report[36]). In our elderly cohort,  
53  
54 Achilles TRs were a tiny, 2.6%, of all TRs. Some of this difference may be explained by  
55  
56  
57

1  
2  
3 the differences in demographics. Reports of high prevalence of Achilles TR came from  
4 studies of young military populations.[37,38] In contrast, our data came from an elderly  
5 Medicare population. Some of the difference could also be due to less ability to diagnose  
6 non-Achilles tendon ruptures until MRI joint imaging became widely available, because  
7 such TRs are less amenable to diagnosis by physical exam.  
8  
9  
10  
11  
12  
13

14  
15  
16  
17 Many authorities describe the relationship between FQs and TRs as a class “effect”.

18  
19 However, FQs as a class had no significant risk of TR compared with each of the four  
20 non-FQ antibiotics in any time window. CIP (n=234,994 subjects) is the oral FQ with the  
21 greatest use and with a greater effect on metalloproteases than other FQs.[39–41]  
22  
23

24 However, neither MXF (n= 14,728 subjects) nor CIP had any TR risk at any anatomic  
25 site in any time window. CIP’s lack of risk is consistent with two studies[5,9] in which  
26 CIP exhibited zero risk or small risks compared to ofloxacin, a racemic mixture whose  
27 active ingredient is the levo-isomer, LVX. We do see a strong association between LVX  
28 and TRs whether we used no LVX or three of the non-FQ antibiotics as controls.  
29  
30  
31  
32  
33  
34  
35  
36

37 However, when we used LEX, a cephalosporin, as the control for LVX’s effect on TRs,  
38 we saw no increased risk.  
39  
40  
41  
42  
43

44 As noted in the introduction, the FDA has added a black box warning about tendon  
45 ruptures to the labels of fluoroquinolones. A 2015 paper[42] described the evidence for  
46 this decision based on the FDA’s Adverse Event Reporting System (FAERS) database  
47 and an empirical Bayes geometric mean (EBGM) score, which is based on the relative  
48 frequency of spontaneous report about a given adverse event in one drug versus the  
49  
50  
51  
52  
53  
54  
55  
56  
57  
58  
59  
60



1  
2  
3 reporting of that adverse event across all drugs. This EBGM score based upon FAERS  
4 database has been useful but FAERS database is still limited by a lack of true  
5 denominator for population at risk, underreporting due to a voluntary reporting scheme  
6 and bias due to limited adjustment variables.[43] Our study was based on a well-defined  
7 Medicare population with 80 variable adjustments. The fact that levofloxacin's EBGM  
8 score was six times that of ofloxacin[42] though both drugs have the same active  
9 ingredient (the levo-isomer of ofloxacin) and the same dose of that ingredient, raises  
10 questions about what factors influenced that score.  
11  
12  
13  
14  
15  
16  
17  
18  
19  
20  
21  
22  
23

24 One previous study described the effect of FQs on TR risk as small and unimportant.[10]  
25 Two studies reported no effect of FQs on TR risk.[9,11] At least 7 observational studies  
26 reported that the use of FQs increased risks of TR.[3–8,12] However, in all but one study,  
27 the number of TRs among patients taking an FQs was small (between 5 and 111). In  
28 comparison, our study included 12,517 (3.8%) such patients. One previous study did  
29 report a large number of TR events, 23,000 (3.5%) patients while on FQs and, like our  
30 study, it focused exclusively on elderly patients.[3] However, it did not compare the  
31 population of FQ users against non-users but FQ usage periods against non-usage periods  
32 in the same set of patients, which were likely periods without visits and thus could not  
33 account for the effect of increased clinical attention provided at visits requiring a strong  
34 systemic antibiotic. Furthermore, they assessed the association between AMX and TRs in  
35 separate analysis and used the risk of TRs in that analysis as the comparator for the risk  
36 observed in the FQ analysis. Finally, their analysis did not include death as a competing  
37  
38  
39  
40  
41  
42  
43  
44  
45  
46  
47  
48  
49  
50  
51  
52  
53  
54  
55  
56  
57  
58  
59  
60

1  
2  
3 risk as is recommend when death rates exceed event rates[23] which was likely the case  
4  
5 because in the demographics of their study was very similar to ours.  
6  
7  
8  
9

10 In our study, AMX treated patients had fewer comorbidities (as was also true in  
11  
12 Daneman's study), almost 14% fewer hospitalizations and half of death rate per 1000  
13  
14 patient-years, compared to patients taking LVX. So the two populations are not  
15  
16 comparable. LVX exhibited 119% increased risk of death in a  $\leq 30$ -day window. They  
17  
18 appears to be reserved for more severe infections or more fragile patients and thus subject  
19  
20 to differential biases.  
21  
22  
23  
24  
25

26 The reported activation of metalloprotease activity by FQs has underpinned the idea of a  
27  
28 causal link between FQs and TRs. The argument goes as follows: FQs stimulate  
29  
30 metalloproteases, which can break down collagen; the tendon is made of collagen; so FQs  
31  
32 may cause TRs. However, our data disrupts this argument. CIP which strongly *stimulates*  
33  
34 metalloprotease activity,[17,18] exhibited *no* risk of TRs in our study, and LEX which  
35  
36 *inhibits* metalloprotease activity[44,45] exhibited a *large* risk. So we have to question  
37  
38 whether metalloprotease activity has any relevance to TR risk, and consider other  
39  
40 explanations for the observed associations.  
41  
42  
43  
44  
45  
46

47 The indication for an antibiotic is a presumed bacterial infection. The reported  
48  
49 associations between antibiotics and TR could be a consequence of the indication rather  
50  
51 than the antibiotic use and a perfect example of the confounding by indication.[46] Such  
52  
53  
54  
55  
56  
57  
58  
59  
60

1  
2  
3 a bias could explain many reported associations between drugs and TR risk including  
4 associations with non-antibiotic drugs reported by Nyysönen.[8]  
5  
6  
7  
8  
9

10 This bias could manifest in different ways. First, that the bacterial infection might  
11 directly increase the risk of TR via stimulation of general immune or cytokine responses,  
12 or even by direct bacterial invasion. A recent study found gram-positive bacteria in a  
13 major share of ruptured tendons but not in “control” tendons removed surgically for  
14 grafting,[47] So the possibility of direct invasion of tendons by circulating bacteria with  
15 subsequent weakening and rupture is plausible.  
16  
17  
18  
19  
20  
21  
22  
23  
24  
25

26 Secondly, the greater clinical attention likely focused on patients needing systemic  
27 antibiotics, especially those with severe infections, could increase the chance of noticing  
28 and documenting a pre-existing TR. A reservoir of not-yet-diagnosed such cases is likely  
29 to exist, because patients do not necessarily correctly identify joint and extremity  
30 symptoms as TRs and seek immediate care for them. Tendon ruptures of the shoulder  
31 capsule, for example, are notorious for developing symptoms slowly over 2-3 years[48]  
32 before being correctly diagnosed. Even Achilles tendon ruptures, can be missed (in 30%  
33 of cases) at the first presentation.[49] Seeger et al. reviewed the medical records of  
34 patients with an insurance claim reporting TRs following antibiotic use and found that  
35 nearly half of the TRs recorded in the claims were either something else (e.g., Bursa  
36 inflammation miscoded as a TR) or had occurred pre antibiotic use but only seen in a  
37 claim post antibiotic use.[11]  
38  
39  
40  
41  
42  
43  
44  
45  
46  
47  
48  
49  
50  
51  
52  
53  
54  
55  
56  
57  
58  
59  
60

1  
2  
3 Indication bias is a plausible explanations for associations reported in observational  
4  
5 studies and it should be considered before assuming the associations are causal.  
6  
7  
8  
9

### 10 **Limitation**

11  
12 This study faces all of the limitations of observational studies. Furthermore, it applies  
13  
14 only to fee-for-service Medicare populations. In addition, we had no options to verify  
15  
16 claims diagnoses via chart review. From a statistical point of view, our findings may have  
17  
18 some limitations. First, we included 80 covariates in one analysis and concern about  
19  
20 possibly strong intercorrelation affecting the validity could exist. To evaluate the  
21  
22 intercorrelation among covariates, we calculated an 80x80 correlation matrix of estimated  
23  
24 regression coefficients from our competing risk regression analysis considering their  
25  
26 time-varying nature. The correlation matrix can deliver information about the strength of  
27  
28 all pairwise correlation and indicate the existence of a collinear relationship between two  
29  
30 predictors. All correlations (except diagonal elements) were below 0.5, only 1.6% were  
31  
32 between 0.2 and 0.5. The largest of the pairwise correlations was 0.33 indicating minimal  
33  
34 bias due to intercorrelation. We also did not consider interactions among covariates in our  
35  
36 analysis because of the enormous number of two way interactions (as large as 6,400) and  
37  
38 thus the problem of overfitting.  
39  
40  
41  
42  
43  
44  
45  
46

### 47 **Funding Statement**

48  
49  
50 This study is supported by the Intramural Research Program of the National Library of  
51  
52 Medicine, National Institutes of Health.  
53  
54  
55  
56  
57  
58  
59  
60

### **Competing interests Statement**

All authors have no competing interest to declare.

### **Contributorship Statement**

SB: study conception, design, analysis and interpretation; critical review of study content; manuscript drafting; approval of the final manuscript. JL: study concept and interpretation; manuscript drafting; approval of the final manuscript. VH: study interpretation; manuscript drafting; approval of the final manuscript. CJM: study conception, design and interpretation; critical review of study content; manuscript drafting; approval of the final manuscript.

### **Data availability**

The authors confirm that the data supporting the findings of this study are available within the article [and/or] its supplementary materials.

**Patient Consent for publication:** Not required.

### **Acknowledgements**

Jason Lau was with National Institutes of Health (NIH) during this work and now he is with the UC Davis Health.

1  
2  
3 This work was partially supported by the Intramural Research Program of the National  
4  
5 Library of Medicine, National Institutes of Health.  
6  
7

8  
9 This research was made possible through the National Institutes of Health (NIH) Medical  
10  
11 Research Scholars Program, a public-private partnership supported jointly by the NIH  
12  
13 and generous contributions to the Foundation for the NIH from the Doris Duke  
14  
15 Charitable Foundation, Genentech, the American Association for Dental Research, the  
16  
17 Colgate-Palmolive Company, Elsevier, alumni of student research programs, and other  
18  
19 individual supporters via contributions to the Foundation for the National Institutes of  
20  
21 Health. For a complete list, please visit the Foundation website at: [http://fnih.org/what-](http://fnih.org/what-we-do/current-education-and-training-programs/mrsp)  
22  
23 [we-do/current-education-and-training-programs/mrsp](http://fnih.org/what-we-do/current-education-and-training-programs/mrsp)  
24  
25  
26  
27  
28  
29  
30  
31  
32  
33  
34  
35  
36  
37  
38  
39  
40  
41  
42  
43  
44  
45  
46  
47  
48  
49  
50  
51  
52  
53  
54  
55  
56  
57  
58  
59  
60

## References

- 1 Hicks LA, Bartoces MG, Roberts RM, *et al.* US outpatient antibiotic prescribing variation according to geography, patient population, and provider specialty in 2011. *Clin Infect Dis* 2015;**60**:1308–16. doi:10.1093/cid/civ076
- 2 Magill SS, Edwards JR, Beldavs ZG, *et al.* Prevalence of Antimicrobial Use in US Acute Care Hospitals, May-September 2011. *JAMA* 2014;**312**:1438. doi:10.1001/jama.2014.12923
- 3 Daneman N, Lu H, Redelmeier DA. Fluoroquinolones and collagen associated severe adverse events: a longitudinal cohort study. *BMJ Open* 2015;**5**:e010077. doi:10.1136/bmjopen-2015-010077
- 4 Morales DR, Slattery J, Pacurariu A, *et al.* Relative and Absolute Risk of Tendon Rupture with Fluoroquinolone and Concomitant Fluoroquinolone/Corticosteroid Therapy: Population-Based Nested Case–Control Study. *Clin Drug Investig* 2019;**39**:205–13. doi:10.1007/s40261-018-0729-y
- 5 van der Linden PD, Sturkenboom MCJM, Herings RMC, *et al.* Increased Risk of Achilles Tendon Rupture With Quinolone Antibacterial Use, Especially in Elderly Patients Taking Oral Corticosteroids. *Arch Intern Med* 2003;**163**:1801. doi:10.1001/archinte.163.15.1801
- 6 Wise BL, Peloquin C, Choi H, *et al.* Impact of age, sex, obesity, and steroid use on quinolone-associated tendon disorders. *Am J Med* 2012;**125**:1228.e23-1228.e28. doi:10.1016/j.amjmed.2012.05.027
- 7 Sode J, Obel N, Hallas J, *et al.* Use of fluoroquinolone and risk of Achilles tendon rupture: a population-based cohort study. *Eur J Clin Pharmacol* 2007;**63**:499–503.

- 1  
2  
3 doi:10.1007/s00228-007-0265-9  
4  
5  
6 8 Nyysönen T, Lantto I, Lüthje P, *et al.* Drug treatments associated with Achilles tendon  
7  
8 rupture. A case-control study involving 1118 Achilles tendon ruptures. *Scand J Med Sci*  
9  
10 *Sports* 2018;**28**:2625–9. doi:10.1111/sms.13281  
11  
12 9 WILTON L V., PEARCE GL, MANN RD. A comparison of ciprofloxacin, norfloxacin,  
13  
14 ofloxacin, azithromycin and cefixime examined by observational cohort studies. *Br J Clin*  
15  
16 *Pharmacol* 2003;**41**:277–84. doi:10.1046/j.1365-2125.1996.03013.x  
17  
18  
19 10 Jupiter DC, Fang X, Ashmore Z, *et al.* The Relative Risk of Achilles Tendon Injury in  
20  
21 Patients Taking Quinolones. *Pharmacother J Hum Pharmacol Drug Ther* 2018;**38**:878–  
22  
23 87. doi:10.1002/phar.2162  
24  
25  
26 11 Seeger JD, West WA, Fife D, *et al.* Achilles tendon rupture and its association with  
27  
28 fluoroquinolone antibiotics and other potential risk factors in a managed care population.  
29  
30 *Pharmacoepidemiol Drug Saf* 2006;**15**:784–92. doi:10.1002/pds.1214  
31  
32  
33 12 Hori K, Yamakawa K, Yoshida N, *et al.* Detection of fluoroquinolone-induced tendon  
34  
35 disorders using a hospital database in Japan. *Pharmacoepidemiol Drug Saf* 2012;**21**:886–  
36  
37 9. doi:10.1002/pds.3285  
38  
39  
40 13 Tanne JH. FDA adds ‘black box’ warning label to fluoroquinolone antibiotics. *BMJ*  
41  
42 2008;**337**:a816. doi:10.1136/bmj.a816  
43  
44  
45 14 Food and Drug Administration. FDA Drug Safety Communication: FDA advises  
46  
47 restricting fluoroquinolone antibiotic use for certain uncomplicated infections; warns  
48  
49 about disabling side effects that can occur together | FDA.  
50  
51 [https://www.fda.gov/drugs/drug-safety-and-availability/fda-drug-safety-communication-](https://www.fda.gov/drugs/drug-safety-and-availability/fda-drug-safety-communication-fda-advises-restricting-fluoroquinolone-antibiotic-use-certain)  
52  
53 [fda-advises-restricting-fluoroquinolone-antibiotic-use-certain](https://www.fda.gov/drugs/drug-safety-and-availability/fda-drug-safety-communication-fda-advises-restricting-fluoroquinolone-antibiotic-use-certain) (accessed 12 Jun 2019).  
54  
55  
56  
57  
58  
59  
60



- 1  
2  
3 15 Food and Drug Administration. FDA Drug Safety Communication: FDA updates  
4 warnings for oral and injectable fluoroquinolone antibiotics due to disabling side effects |  
5  
6 FDA. [https://www.fda.gov/drugs/drug-safety-and-availability/fda-drug-safety-](https://www.fda.gov/drugs/drug-safety-and-availability/fda-drug-safety-communication-fda-updates-warnings-oral-and-injectable-fluoroquinolone-antibiotics)  
7  
8 communication-fda-updates-warnings-oral-and-injectable-fluoroquinolone-antibiotics  
9  
10 (accessed 12 Jun 2019).  
11  
12  
13  
14  
15 16 Del Buono A, Oliva F, Osti L, *et al.* Metalloproteases and tendinopathy. *Muscles*  
16  
17 *Ligaments Tendons J* 2013;**3**:51–7. doi:10.11138/mltj/2013.3.1.051  
18  
19  
20 17 Tsai WC, Hsu CC, Chen CPC, *et al.* Ciprofloxacin up-regulates tendon cells to express  
21  
22 matrix metalloproteinase-2 with degradation of type i collagen. *J Orthop Res* 2011;**29**:67–  
23  
24 73. doi:10.1002/jor.21196  
25  
26  
27 18 Corps AN, Harrall RL, Curry VA, *et al.* Ciprofloxacin enhances the stimulation of matrix  
28  
29 metalloproteinase 3 expression by interleukin-1 $\beta$  in human tendon-derived cells: A  
30  
31 potential mechanism of fluoroquinolone-induced tendinopathy. *Arthritis Rheum*  
32  
33 2002;**46**:3034–40. doi:10.1002/art.10617  
34  
35  
36 19 CMS Virtual Research Data Center (VRDC) | ResDAC. [https://www.resdac.org/cms-](https://www.resdac.org/cms-virtual-research-data-center-vrdc)  
37  
38 virtual-research-data-center-vrdc (accessed 4 Oct 2019).  
39  
40  
41 20 Cubanski J, Swoope C, Boccuti C, *et al.* A Primer on Medicare. 2015.  
42  
43 [http://files.kff.org/attachment/report-a-primer-on-medicare-key-facts-about-the-medicare-](http://files.kff.org/attachment/report-a-primer-on-medicare-key-facts-about-the-medicare-program-and-the-people-it-covers)  
44  
45 program-and-the-people-it-covers (accessed 7 Feb 2019).  
46  
47  
48 21 Johnson ES, Bartman BA, Briesacher BA, *et al.* The incident user design in comparative  
49  
50 effectiveness research. *Pharmacoepidemiol Drug Saf* 2013;**22**:1–6. doi:10.1002/pds.3334  
51  
52  
53 22 Fine JP, Gray RJ. A Proportional Hazards Model for the Subdistribution of a Competing  
54  
55 Risk. *J Am Stat Assoc* 1999;**94**:496. doi:10.2307/2670170  
56  
57  
58  
59  
60

- 1  
2  
3 23 Berry SD, Ngo L, Samelson EJ, *et al*. Competing risk of death: An important  
4 consideration in studies of older adults. *J Am Geriatr Soc* 2010;**58**:783–7.  
5  
6 doi:10.1111/j.1532-5415.2010.02767.x  
7  
8  
9  
10 24 Putter H, Fiocco M, Geskus RB. Tutorial in biostatistics: competing risks and multi-state  
11 models. *Stat Med* 2007;**26**:2389–430. doi:10.1002/sim.2712  
12  
13  
14 25 The Medicare Payment Advisory Commission. MedPAC Data book: Beneficiaries dually  
15 eligible for Medicare and Medicaid - January 2016. 2016.  
16  
17 [http://www.medpac.gov/docs/default-source/publications/january-2016-medpac-and-](http://www.medpac.gov/docs/default-source/publications/january-2016-medpac-and-macpac-data-book-beneficiaries-dually-eligible-for-medicare-and-medicaid.pdf?sfvrsn=0)  
18  
19 [macpac-data-book-beneficiaries-dually-eligible-for-medicare-and-medicaid.pdf?sfvrsn=0](http://www.medpac.gov/docs/default-source/publications/january-2016-medpac-and-macpac-data-book-beneficiaries-dually-eligible-for-medicare-and-medicaid.pdf?sfvrsn=0)  
20  
21 (accessed 23 Jan 2017).  
22  
23  
24  
25  
26 26 The Chronic Condition Warehouse. Chronic Conditions Data Warehouse: CCW Chronic  
27 Condition Algorithms. <https://www.ccwdata.org/web/guest/condition-categories> (accessed  
28  
29 23 Jan 2017).  
30  
31  
32  
33 27 Stricker BHC, Stijnen T. Analysis of individual drug use as a time-varying determinant of  
34 exposure in prospective population-based cohort studies. *Eur J Epidemiol* 2010;**25**:245–  
35  
36 51. doi:10.1007/s10654-010-9451-7  
37  
38  
39  
40 28 Shariff SZ, Cuerden MS, Jain AK, *et al*. The secret of immortal time bias in  
41 epidemiologic studies. *J Am Soc Nephrol* 2008;**19**:841–3. doi:10.1681/ASN.2007121354  
42  
43  
44 29 Shintani AK, Girard TD, Eden SK, *et al*. Immortal time bias in critical care research:  
45 application of time-varying Cox regression for observational cohort studies. *Crit Care*  
46  
47 *Med* 2009;**37**:2939–45. doi:10.1097/CCM.0b013e3181b7fbbb  
48  
49  
50  
51 30 Rosenbaum PR, Rubin DB. The Central Role of the Propensity Score in Observational  
52  
53 Studies for Causal Effects. *Biometrika* 1983;**70**:41–55.  
54  
55  
56  
57  
58  
59  
60

- 1  
2  
3 31 Austin PC. An Introduction to Propensity Score Methods for Reducing the Effects of  
4 Confounding in Observational Studies. *Multivariate Behav Res* 2011;**46**:399–424.  
5  
6 doi:10.1080/00273171.2011.568786  
7  
8  
9  
10 32 Austin PC, Stuart EA. The performance of inverse probability of treatment weighting and  
11 full matching on the propensity score in the presence of model misspecification when  
12 estimating the effect of treatment on survival outcomes. *Stat Methods Med Res*  
13 2017;**26**:1654–70. doi:10.1177/0962280215584401  
14  
15  
16  
17  
18 33 Zakaria MHB, Davis WA, Davis TME. Incidence and predictors of hospitalization for  
19 tendon rupture in Type 2 diabetes: the Fremantle Diabetes Study. *Diabet Med*  
20 2014;**31**:425–30. doi:10.1111/dme.12344  
21  
22  
23  
24  
25 34 Basic-Jukic N, Juric I, Racki S, *et al.* Spontaneous tendon ruptures in patients with end-  
26 stage renal disease. *Kidney Blood Press Res* 2009;**32**:32–6. doi:10.1159/000201792  
27  
28  
29  
30 35 Jafari M, Ansari-Pour N. Why, when and how to adjust your P values? *Cell J*  
31 2019;**20**:604–7. doi:10.22074/cellj.2019.5992  
32  
33  
34 36 Khaliq Y, Zhanel GG. Fluoroquinolone-Associated Tendinopathy: A Critical Review of  
35 the Literature. *Clin Infect Dis* 2003;**36**:1404–10. doi:10.1086/375078  
36  
37  
38  
39 37 White DW, Wenke JC, Mosely DS, *et al.* Incidence of Major Tendon Ruptures and  
40 Anterior Cruciate Ligament Tears in US Army Soldiers. *Am J Sports Med* 2007;**35**:1308–  
41 14. doi:10.1177/0363546507301256  
42  
43  
44  
45 38 Owens B, Mountcastle S, White D. Racial Differences in Tendon Rupture Incidence. *Int J*  
46 *Sports Med* 2007;**28**:617–20. doi:10.1055/s-2007-964837  
47  
48  
49  
50 39 Corps AN, Harrall RL, Curry VA, *et al.* Contrasting effects of fluoroquinolone antibiotics  
51 on the expression of the collagenases, matrix metalloproteinases (MMP)-1 and -13, in  
52  
53  
54  
55  
56  
57  
58  
59  
60

- 1  
2  
3 human tendon-derived cells. *Rheumatology* 2005;**44**:1514–7.  
4  
5 doi:10.1093/rheumatology/kei087  
6  
7  
8 40 Sharma C, Velpandian T, Baskar Singh S, *et al.* Effect of fluoroquinolones on the  
9  
10 expression of matrix metalloproteinase in debrided cornea of rats. *Toxicol Mech Methods*  
11  
12 2011;**21**:6–12. doi:10.3109/15376516.2010.529183  
13  
14  
15 41 Sbardella D, Tundo G, Fasciglione G, *et al.* Role of Metalloproteinases in Tendon  
16  
17 Pathophysiology. *Mini-Reviews Med Chem* 2014;**14**:978–87.  
18  
19 doi:10.2174/1389557514666141106132411  
20  
21  
22 42 Arabyat RM, Raisch DW, McKoy JM, *et al.* Fluoroquinolone-associated tendon-rupture: a  
23  
24 summary of reports in the Food and Drug Administration’s adverse event reporting  
25  
26 system. *Expert Opin Drug Saf* 2015;**14**:1653–60. doi:10.1517/14740338.2015.1085968  
27  
28  
29 43 Sakaeda T, Tamon A, Kadoyama K, *et al.* Data mining of the public version of the FDA  
30  
31 Adverse Event Reporting System. *Int J Med Sci* 2013;**10**:796–803. doi:10.7150/ijms.6048  
32  
33  
34 44 Santavirta S, Takagi M, Kontinen YT, *et al.* Inhibitory effect of cephalothin on matrix  
35  
36 metalloproteinase activity around loose hip prostheses. *Antimicrob Agents Chemother*  
37  
38 1996;**40**:244–6. doi:10.1128/AAC.40.1.244  
39  
40  
41 45 Kannan R, Ruff M, Kochins JG, *et al.* Purification of Active Matrix Metalloproteinase  
42  
43 Catalytic Domains and Its Use for Screening of Specific Stromelysin-3 Inhibitors. *Protein*  
44  
45 *Expr Purif* 1999;**16**:76–83. doi:10.1006/PREP.1999.1068  
46  
47  
48 46 de Koning JS, Klazinga NS, Koudstaal PJ, *et al.* The role of ‘confounding by indication’  
49  
50 in assessing the effect of quality of care on disease outcomes in general practice: results of  
51  
52 a case-control study. *BMC Health Serv Res* 2005;**5**:10. doi:10.1186/1472-6963-5-10  
53  
54  
55 47 Rolf CG, Fu S-C, Hopkins C, *et al.* Presence of Bacteria in Spontaneous Achilles Tendon  
56  
57  
58  
59  
60

1  
2  
3 Ruptures. *Am J Sports Med* 2017;**45**:2061–7. doi:10.1177/0363546517696315

4  
5 48 Tashjian RZ. Epidemiology, Natural History, and Indications for Treatment of Rotator

6  
7 Cuff Tears. *Clin Sports Med* 2012;**31**:589–604. doi:10.1016/J.CSM.2012.07.001

8  
9 49 Christensen I. Rupture of the Achilles tendon; analysis of 57 cases. *Acta Chir Scand*

10  
11 1953;**106**:50–60.  
12  
13  
14  
15  
16  
17  
18  
19  
20  
21  
22  
23  
24  
25  
26  
27  
28  
29  
30  
31  
32  
33  
34  
35  
36  
37  
38  
39  
40  
41  
42  
43  
44  
45  
46  
47  
48  
49  
50  
51  
52  
53  
54  
55  
56  
57  
58  
59  
60

1  
2  
3 **Figure 1. Consort Diagram**  
4  
5  
6  
7  
8  
9  
10  
11  
12  
13  
14  
15  
16  
17  
18  
19  
20  
21  
22  
23  
24  
25  
26  
27  
28  
29  
30  
31  
32  
33  
34  
35  
36  
37  
38  
39  
40  
41  
42  
43  
44  
45  
46  
47  
48  
49  
50  
51  
52  
53  
54  
55  
56  
57  
58  
59  
60

For peer review only

**Table 1. Outcome, Medical/Medication Use, Diseases and Patient Characteristics by Type of Antibiotics**

| Variable                                 | Overall         | FLQ             | CIP             | LVX             | MXF             | AMX             | AZM             | LEX             | AMC             | None           |
|------------------------------------------|-----------------|-----------------|-----------------|-----------------|-----------------|-----------------|-----------------|-----------------|-----------------|----------------|
| N                                        | 1,009,925       | 328,654         | 234,994         | 155,991         | 14,728          | 259,125         | 308,985         | 195,731         | 179,616         | 356,364        |
| Tendon Rupture                           | 34,880(3.5)     | 12,517(3.8)     | 8,811(3.7)      | 5,904(3.8)      | 770(5.2)        | 9,636(3.7)      | 12,448(4.0)     | 8,019(4.1)      | 6,622(3.7)      | 10,169(2.9)    |
| Death                                    | 46,468(4.6)     | 23,249(7.1)     | 14,821(6.3)     | 14,610(9.4)     | 2,136(14.5)     | 9,632(3.7)      | 14,608(4.7)     | 11,394(5.8)     | 9,951(5.5)      | 13,645(3.8)    |
| Censored at HMO entry                    | 127,162(12.6)   | 27,573(8.4)     | 19,847(8.4)     | 11,142(7.1)     | 1,571(10.7)     | 21,215(8.2)     | 26,140(8.5)     | 14,887(7.6)     | 12,674(7.1)     | 65,886(18.5)   |
| Censored at disenrollment                | 145(0.0)        | 25(0.0)         | 13(0.0)         | 13(0.0)         | 2(0.0)          | 19(0.0)         | 27(0.0)         | 23(0.0)         | 16(0.0)         | 85(0.0)        |
| Censored at Dec 31 2016                  | 801,270(79.3)   | 265,290(80.7)   | 191,502(81.5)   | 124,322(79.7)   | 10,249(69.6)    | 218,623(84.4)   | 255,762(82.8)   | 161,408(82.5)   | 150,353(83.7)   | 266,579(74.8)  |
| Years of follow-up, median(total)        | 3.6(4,030,897)  | 4.6(1,620,894)  | 4.8(1,190,308)  | 4.8(789,849)    | 6.0(87,397)     | 4.5(1,274,357)  | 4.6(1,529,370)  | 4.8(1,000,459)  | 4.6(890,340)    | 2.5(1,067,731) |
| Tendon rupture, 1000 person-years        | 8.65            | 7.72            | 7.40            | 7.47            | 8.81            | 7.56            | 8.14            | 8.02            | 7.44            | 9.52           |
| Death, 1000 person-years                 | 11.53           | 14.34           | 12.45           | 18.50           | 24.44           | 7.56            | 9.55            | 11.39           | 11.18           | 12.78          |
| Female                                   | 575,885(57.0)   | 197,915(60.2)   | 146,745(62.4)   | 89,682(57.5)    | 8,747(59.4)     | 151,383(58.4)   | 194,101(62.8)   | 113,308(57.9)   | 104,749(58.3)   | 191,069(53.6)  |
| White                                    | 814,933(80.7)   | 274,785(83.6)   | 196,048(83.4)   | 131,725(84.4)   | 12,464(84.6)    | 215,101(83.0)   | 259,657(84.0)   | 167,825(85.7)   | 153,723(85.6)   | 271,906(76.3)  |
| Black                                    | 75,930(7.5)     | 20,017(6.1)     | 14,286(6.1)     | 8,893(5.7)      | 956(6.5)        | 15,622(6.0)     | 17,296(5.6)     | 9,625(4.9)      | 9,199(5.1)      | 35,023(9.8)    |
| Hispanic                                 | 56,582(5.6)     | 17,044(5.2)     | 12,607(5.4)     | 7,943(5.1)      | 628(4.3)        | 12,494(4.8)     | 14,805(4.8)     | 8,976(4.6)      | 7,802(4.3)      | 24,391(6.8)    |
| Asian                                    | 26,336(2.6)     | 7,316(2.2)      | 5,362(2.3)      | 3,144(2.0)      | 356(2.4)        | 7,624(2.9)      | 7,945(2.6)      | 3,539(1.8)      | 3,440(1.9)      | 10,437(2.9)    |
| Other                                    | 36,144(3.6)     | 9,492(2.9)      | 6,691(2.8)      | 4,286(2.7)      | 324(2.2)        | 8,284(3.2)      | 9,282(3.0)      | 5,766(2.9)      | 5,452(3.0)      | 14,607(4.1)    |
| Ever Dual                                | 162,988(16.1)   | 54,055(16.4)    | 38,277(16.3)    | 28,156(18.0)    | 2,908(19.7)     | 35,305(13.6)    | 44,940(14.5)    | 30,962(15.8)    | 25,255(14.1)    | 66,986(18.8)   |
| Non-Dual LIS                             | 26,955(2.7)     | 7,648(2.3)      | 5,459(2.3)      | 3,746(2.4)      | 385(2.6)        | 5,224(2.0)      | 6,828(2.2)      | 4,191(2.1)      | 3,818(2.1)      | 12,595(3.5)    |
| Non-Dual No LIS                          | 819,982(81.2)   | 266,951(81.2)   | 191,258(81.4)   | 124,089(79.5)   | 11,435(77.6)    | 218,596(84.4)   | 257,217(83.2)   | 160,578(82.0)   | 150,543(83.8)   | 276,783(77.7)  |
| Living in rural area                     | 228,199(22.6)   | 78,581(23.9)    | 56,385(24.0)    | 38,847(24.9)    | 2,801(19.0)     | 58,805(22.7)    | 72,282(23.4)    | 49,977(25.5)    | 42,288(23.5)    | 77,087(21.6)   |
| Days on Rx, median (IQR)                 | N/A             | N/A             | 10.0(7.0-20.0)  | 10.0(7.0-17.0)  | 10.0(7.0-12.0)  | 10.0(7.0-20.0)  | 5.0(5.0-11.0)   | 10.0(7.0-16.0)  | 10.0(10.0-20.0) | N/A            |
| Hospitalization                          | 349,959(29.5)   | 198,846(45.4)   | 142,538(45.3)   | 113,829(52.5)   | 14,002(60.3)    | 132,304(38.8)   | 156,185(37.9)   | 119,209(45.9)   | 103,515(42.5)   | 51,525(14.4)   |
| Outpatient visits per year, median (IQR) | 19.6(11.1-33.0) | 27.1(17.2-42.7) | 27.3(17.5-42.9) | 30.1(19.0-47.8) | 34.0(21.7-53.7) | 23.6(14.5-37.5) | 24.6(15.5-38.8) | 27.5(17.2-43.2) | 26.6(16.7-42.2) | 12.3(6.0-21.8) |
| AMI                                      | 21,222(2.1)     | 9,999(3.0)      | 6,810(2.9)      | 5,862(3.8)      | 698(4.7)        | 6,474(2.5)      | 8,079(2.6)      | 6,215(3.2)      | 5,292(2.9)      | 5,012(1.4)     |
| Atrial Fibrillation                      | 71,635(7.1)     | 31,752(9.7)     | 21,757(9.3)     | 17,731(11.4)    | 2,028(13.8)     | 23,974(9.3)     | 26,182(8.5)     | 21,935(11.2)    | 18,764(10.4)    | 16,314(4.6)    |
| Cataract                                 | 468,608(46.4)   | 183,870(55.9)   | 134,196(57.1)   | 88,574(56.8)    | 9,216(62.6)     | 144,455(55.7)   | 174,897(56.6)   | 112,020(57.2)   | 101,079(56.3)   | 124,931(35.1)  |
| Chronic Kidney Disease                   | 180,441(17.9)   | 86,021(26.2)    | 62,323(26.5)    | 46,121(29.6)    | 4,651(31.6)     | 53,713(20.7)    | 65,577(21.2)    | 50,361(25.7)    | 43,182(24.0)    | 42,916(12.0)   |
| COPD                                     | 130,840(13.0)   | 71,913(21.9)    | 43,961(18.7)    | 48,430(31.0)    | 6,106(41.5)     | 40,109(15.5)    | 66,536(21.5)    | 37,413(19.1)    | 37,579(20.9)    | 22,739(6.4)    |
| Heart Failure                            | 103,010(10.2)   | 51,814(15.8)    | 34,870(14.8)    | 31,377(20.1)    | 3,776(25.6)     | 32,792(12.7)    | 41,647(13.5)    | 31,585(16.1)    | 27,223(15.2)    | 21,907(6.1)    |
| Diabetes                                 | 284,919(28.2)   | 113,424(34.5)   | 81,175(34.5)    | 57,697(37.0)    | 5,942(40.3)     | 81,155(31.3)    | 98,176(31.8)    | 67,548(34.5)    | 59,984(33.4)    | 81,448(22.9)   |
| Glaucoma                                 | 150,839(14.9)   | 56,990(17.3)    | 41,984(17.9)    | 26,603(17.1)    | 2,930(19.9)     | 45,597(17.6)    | 54,726(17.7)    | 33,936(17.3)    | 31,065(17.3)    | 42,355(11.9)   |
| Hip/Pelvic Fracture                      | 7,982(0.8)      | 4,086(1.2)      | 3,000(1.3)      | 2,289(1.5)      | 274(1.9)        | 2,673(1.0)      | 3,005(1.0)      | 2,515(1.3)      | 1,914(1.1)      | 1,689(0.5)     |
| Ischemic Heart Disease                   | 264,648(26.2)   | 117,416(35.7)   | 82,182(35.0)    | 63,659(40.8)    | 6,956(47.2)     | 83,682(32.3)    | 101,999(33.0)   | 70,612(36.1)    | 63,363(35.3)    | 63,372(17.8)   |
| Depression                               | 210,714(20.9)   | 94,554(28.8)    | 68,625(29.2)    | 49,277(31.6)    | 5,298(36.0)     | 65,642(25.3)    | 83,253(26.9)    | 56,747(29.0)    | 51,150(28.5)    | 49,320(13.8)   |
| Alzheimer's Disease or Senile Dementia   | 39,132(3.9)     | 19,796(6.0)     | 14,309(6.1)     | 11,030(7.1)     | 1,206(8.2)      | 11,140(4.3)     | 13,809(4.5)     | 11,846(6.1)     | 9,309(5.2)      | 9,400(2.6)     |
| Osteoporosis                             | 106,966(10.6)   | 47,033(14.3)    | 35,217(15.0)    | 22,918(14.7)    | 2,738(18.6)     | 34,610(13.4)    | 44,016(14.2)    | 26,996(13.8)    | 24,393(13.6)    | 25,216(7.1)    |

|                                                       |               |               |               |               |              |               |               |               |               |               |
|-------------------------------------------------------|---------------|---------------|---------------|---------------|--------------|---------------|---------------|---------------|---------------|---------------|
| Rheumatoid Arthritis/Osteoarthritis                   | 369,584(36.6) | 160,091(48.7) | 117,018(49.8) | 80,115(51.4)  | 8,259(56.1)  | 126,702(48.9) | 148,653(48.1) | 101,310(51.8) | 88,017(49.0)  | 81,855(23.0)  |
| 1 Stroke/Transient Ischemic Attack                    | 58,886(5.8)   | 27,702(8.4)   | 19,843(8.4)   | 15,051(9.6)   | 1,670(11.3)  | 17,829(6.9)   | 22,038(7.1)   | 16,684(8.5)   | 14,245(7.9)   | 14,262(4.0)   |
| 2 Breast Cancer                                       | 45,316(4.5)   | 19,362(5.9)   | 14,344(6.1)   | 9,442(6.1)    | 984(6.7)     | 13,451(5.2)   | 17,676(5.7)   | 12,543(6.4)   | 10,156(5.7)   | 11,042(3.1)   |
| 3 Colorectal Cancer                                   | 15,905(1.6)   | 7,487(2.3)    | 5,421(2.3)    | 4,048(2.6)    | 390(2.6)     | 4,304(1.7)    | 5,170(1.7)    | 4,085(2.1)    | 3,605(2.0)    | 4,104(1.2)    |
| 4 Prostate Cancer                                     | 37,038(3.7)   | 19,705(6.0)   | 15,577(6.6)   | 9,232(5.9)    | 643(4.4)     | 10,967(4.2)   | 11,733(3.8)   | 9,252(4.7)    | 8,070(4.5)    | 8,333(2.3)    |
| 5 Lung Cancer                                         | 14,946(1.5)   | 8,965(2.7)    | 5,144(2.2)    | 6,356(4.1)    | 905(6.1)     | 3,859(1.5)    | 6,633(2.1)    | 3,977(2.0)    | 4,267(2.4)    | 2,733(0.8)    |
| 6 Endometrial Cancer                                  | 7,396(0.7)    | 3,447(1.0)    | 2,670(1.1)    | 1,635(1.0)    | 160(1.1)     | 2,095(0.8)    | 2,637(0.9)    | 1,957(1.0)    | 1,604(0.9)    | 1,847(0.5)    |
| 8 Anemia                                              | 307,310(30.4) | 140,606(42.8) | 100,819(42.9) | 74,308(47.6)  | 7,980(54.2)  | 99,190(38.3)  | 118,327(38.3) | 81,967(41.9)  | 72,587(40.4)  | 71,098(20.0)  |
| 9 Asthma                                              | 86,120(8.5)   | 46,350(14.1)  | 29,327(12.5)  | 30,152(19.3)  | 4,091(27.8)  | 27,632(10.7)  | 46,823(15.2)  | 24,426(12.5)  | 25,465(14.2)  | 13,802(3.9)   |
| 10 Hyperlipidemia                                     | 691,148(68.4) | 257,086(78.2) | 185,199(78.8) | 123,828(79.4) | 12,162(82.6) | 199,236(76.9) | 239,414(77.5) | 152,879(78.1) | 140,364(78.1) | 201,258(56.5) |
| 1 Hyperplasia                                         | 122,010(12.1) | 59,809(18.2)  | 45,517(19.4)  | 28,616(18.3)  | 2,587(17.6)  | 39,031(15.1)  | 42,070(13.6)  | 31,606(16.1)  | 28,398(15.8)  | 27,336(7.7)   |
| 1 Hypertension                                        | 679,287(67.3) | 253,601(77.2) | 181,231(77.1) | 124,646(79.9) | 12,218(83.0) | 192,686(74.4) | 230,409(74.6) | 150,995(77.1) | 136,292(75.9) | 201,777(56.6) |
| 1 Hypothyroidism                                      | 197,447(19.6) | 81,468(24.8)  | 59,450(25.3)  | 40,372(25.9)  | 4,198(28.5)  | 59,893(23.1)  | 76,582(24.8)  | 47,973(24.5)  | 44,249(24.6)  | 50,280(14.1)  |
| 1 Anxiety Disorders                                   | 148,983(14.8) | 70,688(21.5)  | 51,377(21.9)  | 37,563(24.1)  | 4,032(27.4)  | 48,859(18.9)  | 62,418(20.2)  | 41,655(21.3)  | 37,588(20.9)  | 31,709(8.9)   |
| 1 Bipolar Disorder                                    | 17,882(1.8)   | 8,368(2.5)    | 6,104(2.6)    | 4,533(2.9)    | 468(3.2)     | 5,442(2.1)    | 6,658(2.2)    | 5,147(2.6)    | 4,227(2.4)    | 4,242(1.2)    |
| 1 Major Depressive Affective Disorder                 | 153,182(15.2) | 71,732(21.8)  | 52,101(22.2)  | 38,055(24.4)  | 4,148(28.2)  | 48,846(18.9)  | 61,872(20.0)  | 43,416(22.2)  | 38,642(21.5)  | 33,660(9.4)   |
| 1 Schizophrenia and other Psychotic Disorders         | 16,764(1.7)   | 8,591(2.6)    | 6,176(2.6)    | 4,934(3.2)    | 548(3.7)     | 4,421(1.7)    | 5,597(1.8)    | 5,101(2.6)    | 3,811(2.1)    | 4,300(1.2)    |
| 18 Epilepsy                                           | 16,155(1.6)   | 7,543(2.3)    | 5,383(2.3)    | 4,269(2.7)    | 415(2.8)     | 4,310(1.7)    | 5,488(1.8)    | 4,510(2.3)    | 3,621(2.0)    | 4,191(1.2)    |
| 19 Fibromyalgia, Chronic Pain and Fatigue             | 166,279(16.5) | 78,877(24.0)  | 57,494(24.5)  | 41,843(26.8)  | 4,410(29.9)  | 56,152(21.7)  | 70,667(22.9)  | 48,422(24.7)  | 43,379(24.2)  | 33,843(9.5)   |
| 20 Viral Hepatitis (General)                          | 11,969(1.2)   | 4,659(1.4)    | 3,188(1.4)    | 2,523(1.6)    | 287(1.9)     | 3,156(1.2)    | 3,732(1.2)    | 2,712(1.4)    | 2,348(1.3)    | 3,735(1.0)    |
| 21 Liver Disease Cirrhosis and other Liver Conditions | 62,675(6.2)   | 31,930(9.7)   | 23,284(9.9)   | 17,386(11.1)  | 1,919(13.0)  | 19,624(7.6)   | 24,544(7.9)   | 17,393(8.9)   | 15,958(8.9)   | 13,350(3.7)   |
| 22 Leukemias and Lymphomas                            | 13,906(1.4)   | 7,228(2.2)    | 4,822(2.1)    | 4,536(2.9)    | 551(3.7)     | 4,385(1.7)    | 5,905(1.9)    | 4,025(2.1)    | 3,969(2.2)    | 2,758(0.8)    |
| 23 Migraine and other Chronic Headache                | 31,628(3.1)   | 14,936(4.5)   | 11,282(4.8)   | 7,520(4.8)    | 873(5.9)     | 10,841(4.2)   | 13,893(4.5)   | 8,763(4.5)    | 8,403(4.7)    | 6,419(1.8)    |
| 24 Mobility Impairments                               | 20,600(2.0)   | 10,182(3.1)   | 7,356(3.1)    | 5,767(3.7)    | 577(3.9)     | 5,372(2.1)    | 6,629(2.1)    | 5,995(3.1)    | 4,610(2.6)    | 5,439(1.5)    |
| 26 Obesity                                            | 185,101(18.3) | 79,130(24.1)  | 56,609(24.1)  | 41,226(26.4)  | 3,997(27.1)  | 58,654(22.6)  | 69,611(22.5)  | 49,984(25.5)  | 43,740(24.4)  | 44,772(12.6)  |
| 27 Peripheral Vascular Disease                        | 90,132(8.9)   | 45,276(13.8)  | 31,866(13.6)  | 25,977(16.7)  | 3,001(20.4)  | 28,747(11.1)  | 36,241(11.7)  | 28,343(14.5)  | 23,977(13.3)  | 18,446(5.2)   |
| 28 Tobacco Use Disorders                              | 101,890(10.1) | 45,304(13.8)  | 28,907(12.3)  | 27,202(17.4)  | 3,042(20.7)  | 27,261(10.5)  | 37,860(12.3)  | 25,002(12.8)  | 22,975(12.8)  | 26,896(7.5)   |
| 29 Pressure Ulcers and Chronic Ulcers                 | 30,345(3.0)   | 17,688(5.4)   | 12,800(5.4)   | 10,603(6.8)   | 1,196(8.1)   | 9,006(3.5)    | 10,926(3.5)   | 13,404(6.8)   | 9,960(5.5)    | 4,992(1.4)    |
| 30 Deafness and Hearing Impairment                    | 59,576(5.9)   | 27,383(8.3)   | 19,976(8.5)   | 14,014(9.0)   | 1,609(10.9)  | 21,213(8.2)   | 25,498(8.3)   | 16,849(8.6)   | 16,787(9.3)   | 11,900(3.3)   |

Note. Data are presented as No. (%) of patients unless otherwise noted.

Abbreviations: FLQ, fluoroquinolone; CIP, ciprofloxacin; LVX, levofloxacin; MXF, moxifloxacin; AMX, Amoxicillin; AMC, Amoxicillin Clavulanate; AZT, Azithromycin; LEX, Cephalexin; IQR, interquartile range.



**Table 2. Hazard Ratios of Tendon Rupture for Each Covariate**

| Variables                                     | Reference                  | HR(95% CI)       |
|-----------------------------------------------|----------------------------|------------------|
| <b>Female</b>                                 | Male                       | 0.70(0.69,0.72)↓ |
| <b>Black</b>                                  |                            | 0.76(0.73,0.78)↓ |
| <b>Hispanic</b>                               | White                      | 0.91(0.87,0.94)↓ |
| <b>Asian</b>                                  |                            | 0.67(0.63,0.71)↓ |
| <b>Other</b>                                  |                            | 1.05(1.01,1.09)↑ |
| <b>Dual Ever</b>                              | Non-Dual Non-LIS           | 0.66(0.64,0.68)↓ |
| <b>Non-Dual Lis</b>                           |                            | 0.66(0.63,0.70)↓ |
| <b>Living In Rural Area</b>                   | No                         | 0.94(0.92,0.95)↓ |
| <b>Medicare Part D Since 2008</b>             |                            | 1.03(1.00,1.07)  |
| <b>Medicare Part D Since 2009</b>             |                            | 1.11(1.07,1.15)↑ |
| <b>Medicare Part D Since 2010</b>             |                            | 1.16(1.12,1.21)↑ |
| <b>Medicare Part D Since 2011</b>             |                            | 1.17(1.13,1.22)↑ |
| <b>Medicare Part D Since 2012</b>             | Medicare Part D Since 2007 | 1.12(1.08,1.16)↑ |
| <b>Medicare Part D Since 2013</b>             |                            | 1.03(1.00,1.07)  |
| <b>Medicare Part D Since 2013</b>             |                            | 1.05(1.01,1.09)↑ |
| <b>Medicare Part D Since 2015</b>             |                            | 0.91(0.87,0.96)↓ |
| <b>Medicare Part D Since 2016</b>             |                            | 0.93(0.19,4.55)  |
| <b>AMI</b>                                    | No                         | 0.74(0.69,0.79)↓ |
| <b>Atrial Fibrillation</b>                    | No                         | 0.94(0.91,0.97)↓ |
| <b>Cataract</b>                               | No                         | 1.23(1.21,1.25)↑ |
| <b>Chronic Kidney Disease</b>                 | No                         | 0.92(0.89,0.94)↓ |
| <b>COPD</b>                                   | No                         | 0.83(0.81,0.86)↓ |
| <b>Heart Failure</b>                          | No                         | 0.79(0.77,0.82)↓ |
| <b>Diabetes</b>                               | No                         | 0.98(0.96,0.99)↓ |
| <b>Glaucoma</b>                               | No                         | 1.10(1.08,1.12)↑ |
| <b>Hip/Pelvic Fracture</b>                    | No                         | 0.68(0.60,0.77)↓ |
| <b>Ischemic Heart Disease</b>                 | No                         | 1.10(1.08,1.12)↑ |
| <b>Depression</b>                             | No                         | 1.17(1.13,1.21)  |
| <b>Alzheimer's Disease or Senile Dementia</b> | No                         | 0.67(0.63,0.71)↓ |
| <b>Osteoporosis</b>                           | No                         | 1.03(1.01,1.06)↑ |
| <b>Rheumatoid Arthritis/Osteoarthritis</b>    | No                         | 2.84(2.80,2.89)↑ |
| <b>Stroke/Transient Ischemic Attack</b>       | No                         | 0.97(0.94,1.01)  |
| <b>Breast Cancer</b>                          | No                         | 0.94(0.91,0.98)↓ |
| <b>Colorectal Cancer</b>                      | No                         | 0.79(0.74,0.85)↓ |

|    |                                                           |    |                  |
|----|-----------------------------------------------------------|----|------------------|
| 1  | <b>Prostate Cancer</b>                                    | No | 1.03(0.99,1.07)  |
| 2  | <b>Lung Cancer</b>                                        | No | 0.39(0.34,0.45)↓ |
| 3  | <b>Endometrial Cancer</b>                                 | No | 0.85(0.77,0.94)↓ |
| 4  | <b>Anemia</b>                                             | No | 1.01(0.99,1.03)  |
| 5  | <b>Asthma</b>                                             | No | 1.27(1.24,1.31)† |
| 6  | <b>Hyperlipidemia</b>                                     | No | 1.34(1.31,1.36)† |
| 7  | <b>Hyperplasia</b>                                        | No | 1.13(1.10,1.16)† |
| 8  | <b>Hypertension</b>                                       | No | 1.09(1.07,1.11)† |
| 9  | <b>Hypothyroidism</b>                                     | No | 1.08(1.06,1.10)† |
| 10 | <b>Anxiety Disorders</b>                                  | No | 0.98(0.96,1.01)  |
| 11 | <b>Bipolar Disorder</b>                                   | No | 1.02(0.95,1.08)  |
| 12 | <b>Major Depressive Affective Disorder</b>                | No | 1.06(1.02,1.10)† |
| 13 | <b>Schizophrenia and Other Psychotic Disorders</b>        | No | 0.67(0.61,0.74)↓ |
| 14 | <b>Epilepsy</b>                                           | No | 0.83(0.77,0.90)↓ |
| 15 | <b>Fibromyalgia, Chronic Pain and Fatigue</b>             | No | 1.39(1.36,1.42)† |
| 16 | <b>Viral Hepatitis (General)</b>                          | No | 1.04(0.96,1.13)  |
| 17 | <b>Liver Disease Cirrhosis And Other Liver Conditions</b> | No | 0.95(0.92,0.99)↓ |
| 18 | <b>Leukemias and Lymphomas</b>                            | No | 0.94(0.88,1.01)  |
| 19 | <b>Migraine and Other Chronic Headache</b>                | No | 1.28(1.23,1.33)† |
| 20 | <b>Mobility Impairments</b>                               | No | 0.70(0.65,0.76)↓ |
| 21 | <b>Obesity</b>                                            | No | 1.04(1.02,1.06)† |
| 22 | <b>Peripheral Vascular Disease</b>                        | No | 1.00(0.97,1.04)  |
| 23 | <b>Tobacco Use Disorders</b>                              | No | 0.82(0.80,0.85)↓ |
| 24 | <b>Pressure Ulcers and Chronic Ulcers</b>                 | No | 0.82(0.77,0.87)↓ |
| 25 | <b>Deafness and Hearing Impairment</b>                    | No | 1.21(1.17,1.25)† |

Hazard ratios and confidence intervals from the primary analysis for Covariates except for the study antibiotics (which are in Table 3)

Abbreviations: HR, hazard ratio, CI, confidence interval; FLQ, fluoroquinolone; CIP, ciprofloxacin; LVX, levofloxacin; MXF, moxifloxacin; AMX, Amoxicillin; AMC, Amoxicillin Clavulanate; AZT, Azithromycin; LEX, Cephalexin.

†= significantly high with P-value < 0.001, †= significantly high with  $0.001 \leq P\text{-value} < 0.05$

↓= significantly low with P-value < 0.001, ↓= significantly high with  $0.001 \leq P\text{-value} < 0.05$

Table 3. Hazard Ratios of Each Antibiotic by Anatomic Sites and Temporal Order of Drug Exposure

|                                                                               |                   | Any Tendon Rupture | Achilles Tendon Rupture | Complete Rupture of Rotator Cuff | Other Tendon Rupture | Death (Competing risk) |
|-------------------------------------------------------------------------------|-------------------|--------------------|-------------------------|----------------------------------|----------------------|------------------------|
|                                                                               | Temporal Exposure | HR(95% CI)         | HR(95% CI)              | HR(95% CI)                       | HR(95% CI)           | HR(95% CI)             |
| <b>HRs comparing study antibiotic use with no use</b>                         |                   |                    |                         |                                  |                      |                        |
| <b>AMX VS. NO AMX</b>                                                         | ≤ 30              | 0.86(0.80,0.92)↓   | 0.88(0.59,1.33)         | 0.88(0.82,0.95)↓                 | 0.79(0.67,0.93)↓     | 0.66(0.61,0.71)↓       |
|                                                                               | 31 - 60           | 0.94(0.87,1.01)    | 0.80(0.49,1.31)         | 0.91(0.84,0.99)↓                 | 1.08(0.93,1.27)      | 0.69(0.63,0.75)↓       |
|                                                                               | ≥ 61              | 1.00(0.98,1.02)    | 0.99(0.86,1.13)         | 1.01(0.99,1.04)                  | 0.97(0.92,1.01)      | 0.77(0.75,0.78)↓       |
| <b>AMC VS. NO AMC</b>                                                         | ≤ 30              | 0.93(0.85,1.02)    | 1.25(0.79,1.97)         | 0.87(0.79,0.97)↓                 | 1.17(0.98,1.41)      | 0.80(0.75,0.84)↓       |
|                                                                               | 31 - 60           | 0.95(0.85,1.05)    | 1.37(0.82,2.29)         | 0.95(0.84,1.06)                  | 0.81(0.63,1.04)      | 0.77(0.73,0.82)↓       |
|                                                                               | ≥ 61              | 1.07(1.04,1.09)↑   | 0.95(0.81,1.12)         | 1.07(1.04,1.10)↑                 | 1.02(0.96,1.08)      | 0.71(0.70,0.72)↓       |
| <b>AZM VS. NO AZM</b>                                                         | ≤ 30              | 0.99(0.93,1.06)    | 1.15(0.82,1.63)         | 1.00(0.93,1.08)                  | 0.87(0.75,1.01)      | 1.04(0.98,1.10)        |
|                                                                               | 31 - 60           | 0.90(0.84,0.98)↓   | 0.99(0.65,1.49)         | 0.91(0.84,0.99)↓                 | 0.95(0.81,1.11)      | 1.01(0.94,1.08)        |
|                                                                               | ≥ 61              | 1.07(1.05,1.09)↑   | 1.02(0.91,1.15)         | 1.09(1.07,1.12)↑                 | 0.99(0.95,1.04)      | 0.86(0.84,0.88)↓       |
| <b>LEX VS. NO LEX</b>                                                         | ≤ 30              | 1.31(1.22,1.41)↑   | 1.93(1.35,2.75)↑        | 1.19(1.09,1.29)↑                 | 1.79(1.56,2.06)↑     | 1.46(1.40,1.53)↑       |
|                                                                               | 31 - 60           | 1.05(0.95,1.15)    | 1.14(0.66,1.96)         | 1.06(0.96,1.18)                  | 1.02(0.82,1.26)      | 1.31(1.24,1.38)↑       |
|                                                                               | ≥ 61              | 1.08(1.05,1.11)↑   | 1.00(0.85,1.16)         | 1.07(1.05,1.10)↑                 | 1.15(1.09,1.21)↑     | 0.86(0.84,0.88)↓       |
| <b>LVX VS. NO LVX</b>                                                         | ≤ 30              | 1.14(1.05,1.25)↑   | 2.20(1.50,3.24)↑        | 1.16(1.06,1.28)↑                 | 0.96(0.78,1.19)      | 2.19(2.11,2.28)↑       |
|                                                                               | 31 - 60           | 1.09(0.98,1.21)    | 1.91(1.17,3.10)↑        | 1.09(0.97,1.22)                  | 1.14(0.90,1.43)      | 1.80(1.71,1.89)↑       |
|                                                                               | ≥ 61              | 1.02(1.00,1.05)    | 1.22(1.03,1.43)↑        | 1.03(1.00,1.07)↑                 | 0.97(0.91,1.03)      | 0.99(0.97,1.01)        |
| <b>CIP VS. NO CIP</b>                                                         | ≤ 30              | 0.96(0.89,1.03)    | 1.06(0.70,1.60)         | 0.96(0.88,1.04)                  | 0.84(0.71,1.00)↓     | 2.05(1.78,2.35)↑       |
|                                                                               | 31 - 60           | 0.92(0.85,1.01)    | 1.02(0.63,1.67)         | 0.91(0.82,1.00)↓                 | 0.95(0.78,1.14)      | 1.43(1.18,1.72)↑       |
|                                                                               | ≥ 61              | 0.96(0.94,0.98)↓   | 1.16(1.02,1.32)↑        | 0.96(0.94,0.99)↓                 | 0.92(0.88,0.97)↓     | 0.89(0.86,0.93)↓       |
| <b>MXF VS. NO MXF</b>                                                         | ≤ 30              | 0.59(0.37,0.93)    | 0.97(0.15,6.24)         | 0.52(0.30,0.91)↓                 | 0.76(0.33,1.77)      | 1.37(1.30,1.45)↑       |
|                                                                               | 31 - 60           | 0.71(0.43,1.15)    | 0.00(0.00,0.00)         | 0.63(0.35,1.13)                  | 0.93(0.39,2.25)      | 1.26(1.17,1.35)↑       |
|                                                                               | ≥ 61              | 0.99(0.93,1.06)    | 1.02(0.69,1.51)         | 0.99(0.92,1.06)                  | 1.10(0.95,1.27)      | 0.86(0.84,0.88)↓       |
| <b>HRs comparing use of FQ as a class with use of each non-FQ antibiotics</b> |                   |                    |                         |                                  |                      |                        |
| <b>FLQ VS. AMX</b>                                                            | ≤ 30              | 1.00(0.84,1.19)    | 1.49(0.69,3.19)         | 0.94(0.77,1.16)                  | 1.08(0.77,1.50)      | 2.86(2.61,3.13)↑       |
|                                                                               | 31 - 60           | 0.95(0.79,1.15)    | 0.07(0.04,0.12)↓        | 0.94(0.75,1.17)                  | 0.92(0.65,1.31)      | 2.18(1.96,2.44)↑       |
|                                                                               | ≥ 61              | 0.99(0.96,1.02)    | 1.14(0.94,1.40)         | 0.98(0.95,1.02)                  | 1.03(0.96,1.11)      | 1.19(1.16,1.22)↑       |
| <b>FLQ VS. AZM</b>                                                            | ≤ 30              | 0.87(0.73,1.03)    | 1.14(0.54,2.39)         | 0.83(0.68,1.02)                  | 0.98(0.70,1.37)      | 2.35(2.18,2.53)↑       |
|                                                                               | 31 - 60           | 0.99(0.82,1.19)    | 0.06(0.04,0.09)↓        | 0.93(0.75,1.16)                  | 1.06(0.75,1.49)      | 1.94(1.77,2.13)↑       |
|                                                                               | ≥ 61              | 0.93(0.90,0.96)↓   | 1.10(0.91,1.34)         | 0.91(0.88,0.94)↓                 | 1.00(0.93,1.08)      | 1.29(1.25,1.32)↑       |
| <b>FLQ VS. LEX</b>                                                            | ≤ 30              | 0.66(0.55,0.78)↓   | 0.68(0.32,1.42)         | 0.70(0.57,0.87)↓                 | 0.47(0.34,0.66)↓     | 1.80(1.67,1.95)↑       |
|                                                                               | 31 - 60           | 0.85(0.70,1.04)    | 0.05(0.03,0.09)↓        | 0.80(0.64,1.01)                  | 0.99(0.68,1.44)      | 1.48(1.34,1.64)↑       |

|   |                    |                |                  |                  |                  |                  |                  |
|---|--------------------|----------------|------------------|------------------|------------------|------------------|------------------|
| 1 |                    | $\geq 61$      | 0.92(0.89,0.95)↓ | 1.13(0.92,1.40)  | 0.92(0.89,0.96)↓ | 0.86(0.80,0.93)↓ | 1.06(1.03,1.09)↑ |
| 2 |                    | $\leq 30$      | 0.93(0.77,1.11)  | 1.05(0.48,2.32)  | 0.96(0.77,1.19)  | 0.72(0.51,1.02)  | 1.37(1.27,1.48)↑ |
| 3 | <b>FLQ VS. AMC</b> | <b>31 - 60</b> | 0.94(0.77,1.15)  | 0.04(0.02,0.07)↓ | 0.90(0.72,1.14)  | 1.24(0.83,1.86)  | 1.19(1.08,1.31)↑ |
| 4 |                    | $\geq 61$      | 0.93(0.90,0.97)↓ | 1.19(0.95,1.49)  | 0.93(0.89,0.96)↓ | 0.98(0.90,1.06)  | 1.06(1.03,1.09)↑ |

Abbreviations: HR, hazard ratio, CI, confidence interval; FLQ, fluoroquinolone; CIP, ciprofloxacin; LVX, levofloxacin; MXF, moxifloxacin; AMX, Amoxicillin; AMC, Amoxicillin Clavulanate; AZT, Azithromycin; LEX, Cephalexin.

↑= significantly high with P-value < 0.001, ↑= significantly high with  $0.001 \leq P\text{-value} < 0.05$

↓= significantly low with P-value < 0.001, ↓= significantly high with  $0.001 \leq P\text{-value} < 0.05$

For peer review only

Table 4. Pairwise Comparisons

| Comparison                                                                                                 | Temporal Exposure | Any Tendon Rupture | Achilles Tendon Rupture | Complete Rupture of Rotator Cuff | Other Tendon Rupture | Death (Competing risk) |
|------------------------------------------------------------------------------------------------------------|-------------------|--------------------|-------------------------|----------------------------------|----------------------|------------------------|
|                                                                                                            |                   | HR(95% CI)         | HR(95% CI)              | HR(95% CI)                       | HR(95% CI)           | HR(95% CI)             |
| <b>HRs comparing use of each FQ with use of each non-FQ antibiotics in a ≤30-day window</b>                |                   |                    |                         |                                  |                      |                        |
| CIP VS. LVX                                                                                                | ≤ 30              | 0.84(0.75,0.94)↓   | 0.48(0.27,0.86) ↓       | 0.82(0.73,0.94) ↓                | 0.87(0.67,1.15)      | 0.67(0.63,0.71)↓       |
| CIP VS. MXF                                                                                                | ≤ 30              | 1.63(1.02,2.61)↑   | 1.08(0.16,7.29)         | 1.84(1.05,3.24)↑                 | 1.10(0.47,2.60)      | 0.72(0.62,0.83)↓       |
| LVX VS. MXF                                                                                                | ≤ 30              | 1.95(1.21,3.13)↑   | 2.26(0.34,15.17)        | 2.24(1.27,3.94)↑                 | 1.26(0.53,3.01)      | 1.07(0.93,1.24)        |
| CIP VS. AMX                                                                                                | ≤ 30              | 1.11(1.01,1.23)↑   | 1.20(0.66,2.16)         | 1.09(0.97,1.21)                  | 1.06(0.84,1.34)      | 2.23(2.05,2.44)↑       |
| CIP VS. AZM                                                                                                | ≤ 30              | 0.97(0.87,1.06)    | 0.91(0.53,1.57)         | 0.96(0.86,1.07)                  | 0.96(0.77,1.21)      | 1.84(1.71,1.97)↑       |
| CIP VS. LEX                                                                                                | ≤ 30              | 0.73(0.66,0.81)↓   | 0.55(0.31,0.95) ↓       | 0.81(0.72,0.91)↓                 | 0.47(0.37,0.59)↑     | 1.41(1.31,1.52)↑       |
| CIP VS. AMC                                                                                                | ≤ 30              | 1.03(0.91,1.16)    | 0.84(0.46,1.56)         | 1.10(0.96,1.25)                  | 0.71(0.56,0.92)↓     | 1.07(1.00,1.15)        |
| LVX VS. AMX                                                                                                | ≤ 30              | 1.33(1.19,1.49)↑   | 2.50(1.45,4.29)↑        | 1.32(1.16,1.49)↑                 | 1.22(0.93,1.59)      | 3.34(3.07,3.64)↑       |
| LVX VS. AZM                                                                                                | ≤ 30              | 1.15(1.03,1.29)↑   | 1.91(1.13,3.23)↑        | 1.16(1.03,1.31)↑                 | 1.10(0.84,1.44)      | 2.75(2.57,2.95)↑       |
| LVX VS. LEX                                                                                                | ≤ 30              | 0.87(0.78,0.98) ↓  | 1.14(0.68,1.92)         | 0.98(0.86,1.12)                  | 0.54(0.41,0.69)↑     | 2.11(1.97,2.27)↑       |
| LVX VS. AMC                                                                                                | ≤ 30              | 1.23(1.08,1.40)↑   | 1.76(0.98,3.15)         | 1.33(1.15,1.54)↑                 | 0.82(0.62,1.08)      | 1.60(1.49,1.72)↑       |
| MXF VS. AMX                                                                                                | ≤ 30              | 0.68(0.43,1.09)    | 1.10(0.16,7.41)         | 0.59(0.34,1.03)                  | 0.96(0.41,2.27)      | 3.12(2.67,3.65)↑       |
| MXF VS. AZM                                                                                                | ≤ 30              | 0.59(0.37,0.94) ↓  | 0.84(0.13,5.65)         | 0.52(0.30,0.91)↓                 | 0.88(0.37,2.07)      | 2.57(2.21,2.98)↑       |
| MXF VS. LEX                                                                                                | ≤ 30              | 0.45(0.28,0.72) ↓  | 0.50(0.08,3.35)         | 0.44(0.25,0.77)↓                 | 0.43(0.18,1.00)      | 1.97(1.70,2.29)↑       |
| MXF VS. AMC                                                                                                | ≤ 30              | 0.63(0.39,1.01)    | 0.78(0.11,5.33)         | 0.60(0.34,1.05)                  | 0.65(0.28,1.53)      | 1.50(1.29,1.73)↑       |
| <b>HRs comparing use of FQ as a class with use of each non-FQ antibiotics across different time window</b> |                   |                    |                         |                                  |                      |                        |
| FLQ VS. AMX                                                                                                | Overall           | 0.98(0.90,1.07)    | 0.49(0.36,0.68)         | 0.95(0.86,1.06)                  | 1.01(0.86,1.19)      | 1.95(1.86,2.05)↑       |
| FLQ VS. AZM                                                                                                | Overall           | 0.93(0.85,1.01)    | 0.42(0.30,0.57)         | 0.89(0.80,0.98)↓                 | 1.01(0.86,1.19)      | 1.80(1.73,1.88)↑       |
| FLQ VS. LEX                                                                                                | Overall           | 0.80(0.73,0.88)    | 0.34(0.24,0.47)         | 0.80(0.72,0.89)                  | 0.74(0.62,0.88)      | 1.42(1.35,1.48)↑       |
| FLQ VS. AMC                                                                                                | Overall           | 0.93(0.85,1.02)    | 0.37(0.26,0.52)         | 0.93(0.83,1.03)                  | 0.96(0.80,1.15)      | 1.20(1.15,1.25)↑       |

Abbreviations: HR, hazard ratio, CI, confidence interval; FLQ, fluoroquinolone; CIP, ciprofloxacin; LVX, levofloxacin; MXF, moxifloxacin; AMX, Amoxicillin; AMC, Amoxicillin Clavulanate; AZT, Azithromycin; LEX, Cephalexin.

↑= significantly high with P-value < 0.001, ↑= significantly high with 0.001 ≤ P-value < 0.05

↓= significantly low with P-value < 0.001, ↓= significantly high with 0.001 ≤ P-value < 0.05

1  
2  
3  
4  
5  
6  
7  
8  
9  
10  
11  
12  
13  
14  
15  
16  
17  
18  
19  
20  
21  
22  
23  
24  
25  
26  
27  
28  
29  
30  
31  
32  
33  
34  
35  
36  
37  
38  
39  
40  
41  
42  
43  
44  
45  
46  
47  
48  
49  
50  
51  
52  
53  
54  
55  
56  
57  
58  
59  
60

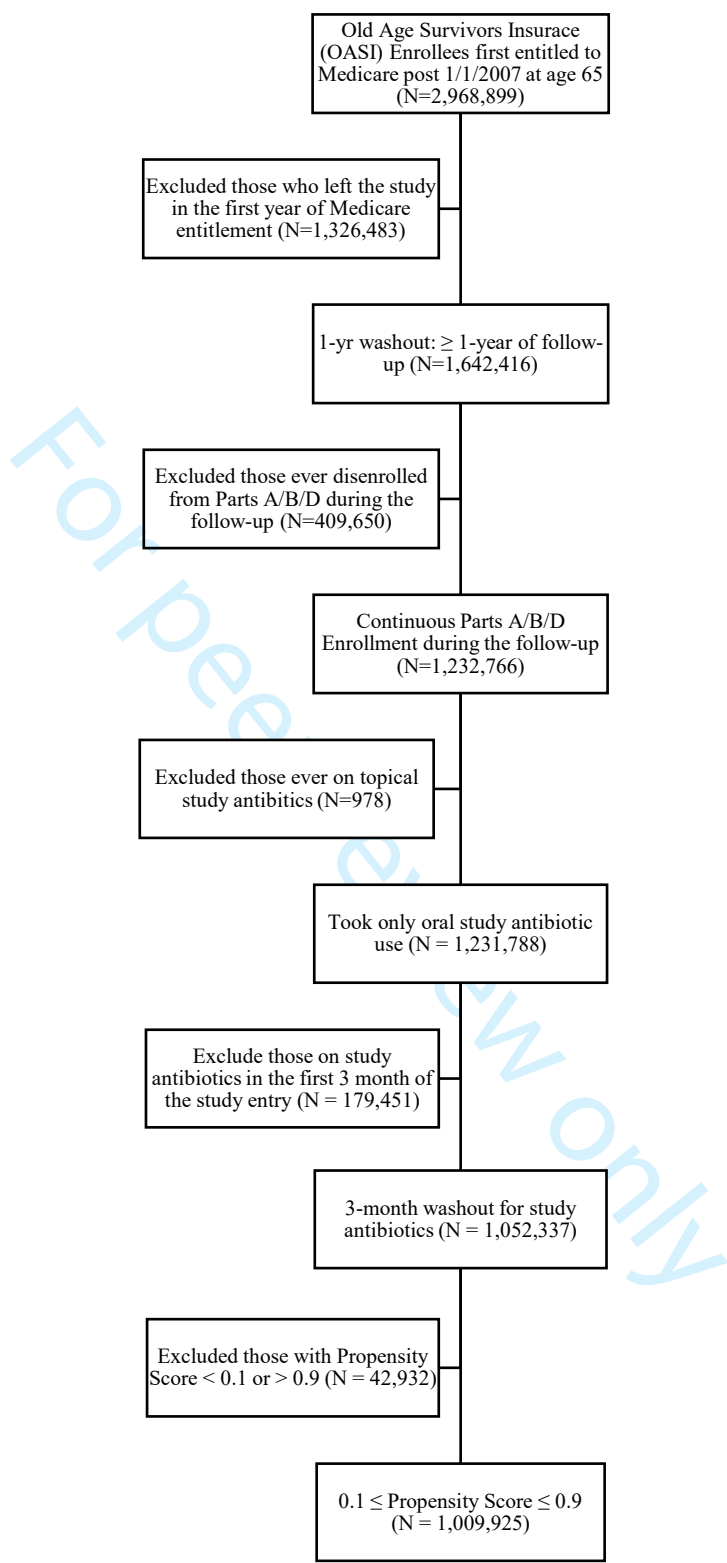

Supplementary Figure. Secular Trend of Study Antibiotic Use



X-axis: Calendar year.

Y-axis: % of patients on each drug class.

STROBE Statement—Checklist of items that should be included in reports of *case-control studies*

|                           | Item No | Recommendation                                                                                                                                                                                    | Page No |
|---------------------------|---------|---------------------------------------------------------------------------------------------------------------------------------------------------------------------------------------------------|---------|
| <b>Title and abstract</b> | 1       | (a) Indicate the study's design with a commonly used term in the title or the abstract                                                                                                            | 1       |
|                           |         | (b) Provide in the abstract an informative and balanced summary of what was done and what was found                                                                                               | 2       |
| <b>Introduction</b>       |         |                                                                                                                                                                                                   |         |
| Background/rationale      | 2       | Explain the scientific background and rationale for the investigation being reported                                                                                                              | 5       |
| Objectives                | 3       | State specific objectives, including any prespecified hypotheses                                                                                                                                  | 5       |
| <b>Methods</b>            |         |                                                                                                                                                                                                   |         |
| Study design              | 4       | Present key elements of study design early in the paper                                                                                                                                           | 6       |
| Setting                   | 5       | Describe the setting, locations, and relevant dates, including periods of recruitment, exposure, follow-up, and data collection                                                                   | 6       |
| Participants              | 6       | (a) Give the eligibility criteria, and the sources and methods of case ascertainment and control selection. Give the rationale for the choice of cases and controls                               | 6       |
|                           |         | (b) For matched studies, give matching criteria and the number of controls per case                                                                                                               |         |
| Variables                 | 7       | Clearly define all outcomes, exposures, predictors, potential confounders, and effect modifiers. Give diagnostic criteria, if applicable                                                          | 7       |
| Data sources/measurement  | 8*      | For each variable of interest, give sources of data and details of methods of assessment (measurement). Describe comparability of assessment methods if there is more than one group              | 7       |
| Bias                      | 9       | Describe any efforts to address potential sources of bias                                                                                                                                         | 8-9     |
| Study size                | 10      | Explain how the study size was arrived at                                                                                                                                                         | 6       |
| Quantitative variables    | 11      | Explain how quantitative variables were handled in the analyses. If applicable, describe which groupings were chosen and why                                                                      | 8       |
| Statistical methods       | 12      | (a) Describe all statistical methods, including those used to control for confounding                                                                                                             | 7-9     |
|                           |         | (b) Describe any methods used to examine subgroups and interactions                                                                                                                               | n/a     |
|                           |         | (c) Explain how missing data were addressed                                                                                                                                                       | n/a     |
|                           |         | (d) If applicable, explain how matching of cases and controls was addressed                                                                                                                       | n/a     |
|                           |         | (e) Describe any sensitivity analyses                                                                                                                                                             | n/a     |
| <b>Results</b>            |         |                                                                                                                                                                                                   |         |
| Participants              | 13*     | (a) Report numbers of individuals at each stage of study—eg numbers potentially eligible, examined for eligibility, confirmed eligible, included in the study, completing follow-up, and analysed | 9       |
|                           |         | (b) Give reasons for non-participation at each stage                                                                                                                                              | 9       |
|                           |         | (c) Consider use of a flow diagram                                                                                                                                                                | 9       |
| Descriptive data          | 14*     | (a) Give characteristics of study participants (eg demographic, clinical, social) and information on exposures and potential confounders                                                          | 9-10    |
|                           |         | (b) Indicate number of participants with missing data for each variable of interest                                                                                                               | n/a     |
| Outcome data              | 15*     | Report numbers in each exposure category, or summary measures of exposure                                                                                                                         | 10      |





# BMJ Open

## The association between Tendon Ruptures and Use of Fluoroquinolone, and other oral antibiotics: A 10-year Retrospective Study of 1 million U.S. senior Medicare beneficiaries

|                                 |                                                                                                                                                                                 |
|---------------------------------|---------------------------------------------------------------------------------------------------------------------------------------------------------------------------------|
| Journal:                        | <i>BMJ Open</i>                                                                                                                                                                 |
| Manuscript ID                   | bmjopen-2019-034844.R3                                                                                                                                                          |
| Article Type:                   | Original research                                                                                                                                                               |
| Date Submitted by the Author:   | 22-Oct-2020                                                                                                                                                                     |
| Complete List of Authors:       | Baik, Seo; National Library of Medicine, Lau, Jason; National Library of Medicine Huser, Vojtech ; National Library of Medicine McDonald, Clement; National Library of Medicine |
| <b>Primary Subject Heading</b>: | Epidemiology                                                                                                                                                                    |
| Secondary Subject Heading:      | General practice / Family practice, Pharmacology and therapeutics                                                                                                               |
| Keywords:                       | CLINICAL PHARMACOLOGY, EPIDEMIOLOGY, ORAL MEDICINE, Musculoskeletal disorders < ORTHOPAEDIC & TRAUMA SURGERY, ACCIDENT & EMERGENCY MEDICINE                                     |
|                                 |                                                                                                                                                                                 |

SCHOLARONE™  
Manuscripts



I, the Submitting Author has the right to grant and does grant on behalf of all authors of the Work (as defined in the below author licence), an exclusive licence and/or a non-exclusive licence for contributions from authors who are: i) UK Crown employees; ii) where BMJ has agreed a CC-BY licence shall apply, and/or iii) in accordance with the terms applicable for US Federal Government officers or employees acting as part of their official duties; on a worldwide, perpetual, irrevocable, royalty-free basis to BMJ Publishing Group Ltd ("BMJ") its licensees and where the relevant Journal is co-owned by BMJ to the co-owners of the Journal, to publish the Work in this journal and any other BMJ products and to exploit all rights, as set out in our [licence](#).

The Submitting Author accepts and understands that any supply made under these terms is made by BMJ to the Submitting Author unless you are acting as an employee on behalf of your employer or a postgraduate student of an affiliated institution which is paying any applicable article publishing charge ("APC") for Open Access articles. Where the Submitting Author wishes to make the Work available on an Open Access basis (and intends to pay the relevant APC), the terms of reuse of such Open Access shall be governed by a Creative Commons licence – details of these licences and which [Creative Commons](#) licence will apply to this Work are set out in our licence referred to above.

Other than as permitted in any relevant BMJ Author's Self Archiving Policies, I confirm this Work has not been accepted for publication elsewhere, is not being considered for publication elsewhere and does not duplicate material already published. I confirm all authors consent to publication of this Work and authorise the granting of this licence.

1  
2  
3 **The association between Tendon Ruptures and Use of Fluoroquinolone, and other oral**  
4 **antibiotics: A 10-year Retrospective Study of 1 million U.S. senior Medicare beneficiaries**  
5  
6  
7  
8  
9

10 **Seo Baik<sup>1</sup>, PhD, Jason J. Lau<sup>2</sup>, MD, Vojtech Huser<sup>1</sup>, MD, PhD, Clement J. McDonald<sup>1</sup>, MD**  
11  
12  
13

14 Author Affiliations  
15

- 16  
17 1. Lister Hill National Center for Biomedical Communications, National Library of  
18 Medicine, U.S. National Institutes of Health, Bethesda, Maryland, USA (Drs. Baik,  
19 Huser and McDonald)  
20  
21  
22 2. Department of Pediatric, UC Davis Health, Sacramento, California (Dr. Lau)  
23  
24  
25  
26  
27

28 Address reprint request to Dr. McDonald (corresponding author) at Lister Hill National Center  
29 for Biomedical Communications, National Library of Medicine, U.S. National Institutes of  
30 Health, 8600 Rockville Pike, Building 38A, Room 07N710, Bethesda, Maryland 20894, USA  
31  
32

33 Telephone: +1 (301) 496-4441  
34

35 E-mail: ClemMcDonald@mail.nih.gov  
36  
37  
38  
39  
40  
41  
42  
43  
44

45 **4000 Words (4000 Max)**  
46  
47  
48  
49  
50  
51  
52  
53  
54  
55  
56  
57  
58  
59  
60

**Abstract (298 words; 300 Max)**

**Objectives:** To assess the association of fluoroquinolone use with tendon ruptures compared to no fluoroquinolone and that of the four most commonly prescribed non-fluoroquinolone antibiotics in the US.

**Design:** Retrospective observational study.

**Setting:** U.S. seniors enrolled in the federal old-age, survivor's insurance program.

**Participants:** 1,009,925 Medicare fee-for-service beneficiaries and their inpatient, outpatient, prescription drug records were used.

**Interventions:** Seven oral antibiotics, fluoroquinolones (ciprofloxacin, levofloxacin, moxifloxacin) and amoxicillin, amoxicillin-clavulanate, azithromycin and cephalexin.

**Primary and Secondary Outcome measures:** All tendon ruptures combined, and three types of tendon ruptures by anatomic site, Achilles tendon rupture, rupture of rotator cuff and other tendon ruptures occurred in 2007-2016.

**Results:** Of three fluoroquinolones, only levofloxacin exhibited a significant increased risk of tendon ruptures - 16% (HR=1.16; 95% CI 1.06-1.28), and 120% (HR=2.20; 95% CI 1.50-3.24) for rotator cuff and Achilles tendon rupture respectively in the  $\leq 30$ -day window. Ciprofloxacin (HR=0.96; 95% CI 0.89-1.03) and moxifloxacin (HR=0.59; 95% CI 0.37-0.93) exhibited no increased risk of tendon ruptures combined.

Among the non-fluoroquinolone antibiotics, cephalexin exhibited *increased* risk of combined tendon ruptures (HR=1.31; 95% CI 1.22-1.41) and modest to large risks across all anatomic rupture sites (HRs 1.19-1.93) at  $\leq 30$ -day window. Notably, the risk of

1  
2  
3 levofloxacin never exceeded the risk of the non-fluoroquinolone, cephalexin in any  
4  
5 comparison.  
6  
7

8  
9 **Conclusions:** In our study, fluoroquinolones as a class were not associated with the  
10 increased risk of tendon ruptures. Neither ciprofloxacin nor moxifloxacin exhibited any  
11 risk for tendon ruptures. Levofloxacin did exhibit significant increased risk. Cephalexin  
12 with no reported effect on metalloprotease activity had an equal or greater risk than  
13 levofloxacin; so we question whether metalloprotease activity has any relevance to  
14 observed associations with tendon rupture. Confounding by indication bias may be more  
15 relevant and should be given more consideration as explanation for significant  
16 associations in observational studies of tendon rupture.  
17  
18  
19  
20  
21  
22  
23  
24  
25  
26  
27  
28  
29  
30  
31  
32  
33  
34  
35  
36  
37  
38  
39  
40  
41  
42  
43  
44  
45  
46  
47  
48  
49  
50  
51  
52  
53  
54  
55  
56  
57  
58  
59  
60

### Strengths and limitations of this study

- We conducted a large (more than 1 million US senior subjects) retrospective study of outpatient prescription drug records to assess the association between the use of fluoroquinolones and the occurrence of tendon ruptures compared to the most commonly used non-fluoroquinolone oral antibiotics.
- Our study included all oral fluoroquinolones (ciprofloxacin, levofloxacin, moxifloxacin) prescribed in the US and the four most commonly prescribed non-fluoroquinolone antibiotics: amoxicillin, amoxicillin-clavulanate, azithromycin and cephalexin as controls.
- In addition to reporting the risk of any tendon rupture, we also reported the risk of three types of tendon ruptures by anatomic site 1) Achilles tendon rupture, 2) rupture of rotator cuff and 3) tendon ruptures on other anatomic sites as separate outcomes.
- This study is possibly only applicable to U.S. senior, aged 65 or more, Medicare fee-for-service beneficiaries.
- We had no options to verify claims diagnoses via chart review.

## Introduction

Fluoroquinolones (FQ) are among the most widely prescribed antibiotics in the outpatient setting[1,2] due to their broad spectrum treatment of bacteria found in respiratory, urinary, joint, and skin infections. Several observational studies have reported the association between the use of FQs and tendinitis and tendon rupture (TR), especially of the Achilles tendon[3–12] and the U.S. Food and Drug Administration (FDA) issued black box warnings to FQ antibiotics beginning in 2008.[13] The warning was updated in 2016 to recommend using alternative antibiotics when possible.[14,15] The fact that FQs upregulate the production of metalloproteinase enzymes with collagenase activity that could weaken tendons is taken as a mechanism to explain this reported risk.[16–18]

Studies that reported association between FQ use and TR used one or more other antibiotics as controls. One study compared the FQ rupture rates with patients using azithromycin, the most frequently used oral antibiotic in the US. Only two focused principally on TR risk among the elderly. None compared TR rates of *FQs* with those of cephalexin -- the 3rd most commonly prescribed oral antibiotic in the US.

The Virtual Research Data Center (VRDC) of Center for Medicare and Medicaid Services (CMS)[19] carries more than 10 years of Medicare claims, which include information about the usage of prescription drugs and encounter diagnoses (including tendon ruptures). It also carries information about 42 major chronic conditions, demographic characteristic and vital status. We conducted a large observational study using the VRDC to assess the association of FQ antibiotics with TR compared to that of



1  
2  
3 the four most commonly prescribed non-FQ antibiotics in the US. Here we report the  
4  
5 results of that analysis.  
6  
7  
8  
9

## 10 **Methods**

### 11 *Patient and public involvement*

12  
13  
14 Neither patients nor the public were not involved in the design of the study.  
15  
16  
17

### 18 *Study population*

19  
20 We derived our study population from a 20% random sample of Medicare prescription  
21  
22 drug coverage (Part D) enrollees who first enrolled in the Medicare under old age and  
23  
24 survivors insurance within a month of age 65 (779-781 month-old) and on or after  
25  
26 1/1/2007 - the first full year of Part D prescriptions availability. We included claim data  
27  
28 through 12/31/2016, the end of VRDC claim data available to us. All of the VRDC data  
29  
30 is de-identified and researchers must perform all of their analysis within the VRDC  
31  
32 computer systems, and can only pull statistical results from it.[19] This study was  
33  
34 declared not human subject research by the Office of Human Research Protection at the  
35  
36 National Institutes of Health and by the CMS's Privacy Board.  
37  
38  
39  
40  
41  
42  
43

44 We required subjects to be continuously enrolled in hospital insurance (Part A) and  
45  
46 medical insurance (Part B) to assure we had full outpatient and inpatient claims data,  
47  
48 which are not available for nearly 20% of subjects with Part D only.[20] To obtain a  
49  
50 cohort of new TR patients, we excluded individuals with TRs recorded in the first year of  
51  
52 their Medicare entitlement.[21] In order to assure sufficient follow-up, we excluded  
53  
54  
55  
56  
57  
58  
59  
60

1  
2  
3 individuals with less than 1-year follow-up. Moreover, to obtain incident (or new) drug  
4 user cohort, we excluded individuals who were prescribed any study antibiotics during  
5 their first 3-month after Part D enrollment, while ignoring the data during the same time  
6 window for individuals not taking study antibiotics. By doing so, we minimize survivor  
7 bias from a prevalent users (Figure 1 Consort Diagram).  
8  
9  
10  
11  
12  
13

### 14 15 16 17 Primary Outcome

18 We identified patients with TR based upon International Classification of Diseases  
19 (ICD)-9-CM codes of 726.13, 727.60-727.69, and ICD-10-CM codes of M66.2, M66.3,  
20 M66.8, M66.9, and M75.1. We combined all TRs and reported them as one outcome, and  
21 report three types of TRs by anatomic site 1) Achilles tendon rupture, 2) rupture of  
22 rotator cuff and 3) TRs on other anatomic sites as separate outcomes. We focused on  
23 Achilles TR because it was the sole focus of many prior studies and on rotator cuff TR  
24 because it is the predominant TR of the elderly. We lumped the remaining as “other  
25 TRs”.  
26  
27  
28  
29  
30  
31  
32  
33  
34  
35  
36  
37  
38  
39

### 40 Study antibiotics

41 We included a total of seven study antibiotics prescribed in the US including all three  
42 oral FQs (moxifloxacin (MXF), ciprofloxacin (CIP), levofloxacin (LVX), the active  
43 stereoisomer of ofloxacin) and the four most frequently prescribed non-FQ oral  
44 antibiotics (amoxicillin (AMX), amoxicillin clavulanate (AMC), azithromycin (AZT) and  
45 cephalexin (LEX)) as a control. Ciprofloxacin and the four non-FQ, study antibiotics  
46 were the five most frequently used U.S. oral antibiotics in 2011.  
47  
48  
49  
50  
51  
52  
53  
54  
55  
56  
57  
58  
59  
60

### Statistical Analysis

We analyzed each of the four TR outcomes in separate Fine-Gray competing risk regression analyses with death as the competing risk.[22,23] Individuals became eligible for “the study” at their Medicare enrollment but prescription data did not become available until their Part D enrollment. We followed them from their entry in Part D (while accounting for left truncation[24]) until their first diagnosis of TR, death, switch to a capitated plan, disenrollment from Medicare or 12/31/2016 – whichever came first. In each regression analysis, we included the seven antibiotics whose effects on TR were our primary interest. We adjusted hazard ratio (HR) of each study antibiotic for concurrent use of the other study antibiotics. We also adjusted for calendar year of individual’s Part D entry, to account for secular trends, and their socio-demographic characteristics of gender, race, rural residency (Yes/No) and income status. We inferred individual’s income level from the monthly indicators of dual-eligibility and Low Income Subsidy (LIS) status, which separate subjects into three groups; 1) dual whose income is below 135% Federal Poverty Line (FPL); 2) non-dual LIS whose income is between 135 and 150% FPL; and 3) non-dual no LIS whose income is above 150% FPL, respectively. We used this variable in the analysis as a surrogate for economic status.[25] We also included the 42 chronic conditions within the Medicare Master Beneficiary Summary File [26] that had >1% prevalence as measures of overall health. We assumed that patients were on a given study drug from the prescription dispensing date to the end of days of supply. We did not distinguish between different brands of a study drugs. Following the approach of prior studies,[3–5] we separated subjects by temporal exposure within each study drug,

1  
2  
3 including groups for never exposed, exposed within 30 days, 31-60 days, and >60 days of  
4 the index (or TR event) time. Thus, by this approach we could detect the presumed short  
5 term action of the FQ's on tendons and avoid the risk of non-differential misclassification  
6 that can occur with too simple (yes/no) drug exposure measures.[27] In order to minimize  
7 the immortal time bias, we treated all drug usage measures and all socio-demographic  
8 characteristics, except gender, race and rural residency, as time-varying  
9 covariates.[28,29] In order to mitigate selection bias toward use of any study antibiotics,  
10 we employed a propensity score (PS) approach.[30,31] We first derived a PS of taking  
11 any of study antibiotics as a function of individual's characteristics at the time of the first  
12 antibiotic use after Part D entry from a multiple logistic regression. We used the median  
13 days to the first study antibiotic use in patients taking study antibiotics as the cutoff time  
14 for individuals not taking study antibiotics. We performed our analyses with an inverse  
15 propensity score weight (IPSW) excluding individuals with the PS below 0.1 and above  
16 0.9, to mitigate poorer performance in the presence of a strong treatment-selection  
17 process.[32] In post-hoc analyses, we also compared the risk of TR of each study  
18 antibiotics to that of every other study antibiotic on a pairwise basis.

## 41 42 **Results**

### 43 Study population and Secular trend

44 From our 20% sample of Part D enrollees, 1,009,925 individuals satisfied all our  
45 selection criteria including the washout of individuals with any antibiotic use in their first  
46 3-month of Part D enrollment (Figure 1 Consort Diagram). Follow-up began with an  
47 individual's enrollment in Part D program (median (IQR) 0 (0-122) days from the  
48  
49  
50  
51  
52  
53  
54  
55  
56  
57  
58  
59  
60

1  
2  
3 Medicare entitlement). We followed them for a median of 3.6 years (total 4,030,897  
4 patient-years) until their first diagnosis of TR (3.5%), death (4.6%), switch to a capitated  
5 plan (12.6%), disenrollment from Medicare (<1%) or study end on 12/31/2016 (79.3%),  
6 whichever came first. Patients had their first post enrollment claim with a diagnosis of  
7 TR at a median age of 68.5 (IQR 67.2-70.4). The proportions of non-Hispanic White,  
8 female and rural residents were 80.7%, 57.0%, and 22.6% respectively. About a fifth of  
9 individuals received federal/state subsidies, i.e. Medicaid coverage on top of Medicare  
10 (dual 16.1%) or assistance in paying their Part D premium and coinsurance/copayment  
11 (non-dual LIS 2.7%). Among the 42 Medicare chronic conditions, hypertension (67.3%),  
12 hyperlipidemia (68.4%), cataract (46.4%), rheumatoid arthritis/osteoarthritis (36.6%),  
13 anemia (30.4%), ischemic heart disease (26.2%), and chronic kidney disease (17.9%)  
14 were the seven most prevalent (Table 1).  
15  
16  
17  
18  
19  
20  
21  
22  
23  
24  
25  
26  
27  
28  
29  
30  
31  
32

33 Of the 328,654 (33.0%) patients who ever took an FQ, 71.5%, 47.5% and 4.5% had taken  
34 CIP, LVX and MXF respectively. Of 576,885 (57.1%) of patients who ever took a non-  
35 FQ antibiotic, the figures were 53.6%, 44.9%, 33.9% and 31.1% for AZM, AMX, LEX,  
36 and AMC, respectively. Patients who took one or more study antibiotics took a median  
37 (IQR) of 3.0 (1.0-6.0) study antibiotic prescriptions and took a median (IQR) 2.0 (1.0-  
38 3.0) different study antibiotics during the observation period. About 2.5% patients who  
39 took one or more study antibiotics took one or more such antibiotics at the same time.  
40  
41  
42  
43  
44  
45  
46  
47  
48  
49 Secular trends in study antibiotics usage existed (Supplementary Figure 1). MXF usage  
50 declined precipitously from 5.0% in 2007 to almost zero in 2016 – overweighting the  
51 MXF statistics for early entrants into Medicare and yielding a longer mean follow-up  
52  
53  
54  
55  
56  
57  
58  
59  
60

1  
2  
3 time. CIP use hit a peak, and LVX, a nadir, in 2011. The use of AMX, AMC and LEX  
4 trended slowly upward (Supplementary Figure 1). The mode (median) of supply  
5 durations for each antibiotics were short--10 (7) for AMX, 10 (10) for AMC, 5 (5) for  
6 AZM, 10 (7) for LEX, 7 (7) for CIP, 10 (7) for LVX, 10 (11) for MXF. About 35% of  
7 individuals were never exposed to any of the study antibiotics during the study period.  
8  
9

10  
11  
12  
13  
14  
15  
16  
17 Unadjusted figures for TR prevalence across each of the seven study antibiotic users and  
18 the no study antibiotic users ranged from a high of 5.2% for MXF to a low of 2.9% for no  
19 antibiotic (Table 1). Except for MXF, the *unadjusted* prevalence of TRs associated with  
20 each non-FQ antibiotic was *greater than* or equal to that of each FQ antibiotic. The TR  
21 rates per 1000 patient-years followed the same pattern, with the non-FQ antibiotics  
22 topping the rates of all FQs except MXF (with the highest rate), possibly due to  
23 overweighting of MXF usage in the early years of the study. Patients who ever took an  
24 FQ had the highest unadjusted rate of death per 1000 person-years. LVX's death rate was  
25 nearly twice the rate of each non-FQ antibiotics. The size of the associations with  
26 conditions like diabetes, chronic renal failure and heart failure paralleled the magnitude  
27 of the death rates and was generally higher with FQs than non-FQ antibiotics (Table 1).  
28  
29  
30  
31  
32  
33  
34  
35  
36  
37  
38  
39  
40  
41  
42  
43

#### 44 Primary Analysis

45  
46  
47 Table 2 presents HRs for all non-antibiotic covariates in our Fine-Gray competing risk  
48 regression with IPSW. For simplicity sake, in Table 2, we report the HRs of all anatomic  
49 types of tendon ruptures taken together. Being a female (vs. male), African-American,  
50 Hispanic, and Asian (vs. white), being dual or non-dual LIS (vs. non-dual no LIS) and  
51  
52  
53  
54  
55  
56  
57  
58  
59  
60

1  
2  
3 living in a rural area were all associated with a *reduced* risk of tendon rupture. These risk  
4  
5 reductions were 24% or more for all but Hispanics and rural residency covariates, and the  
6  
7 reductions were similar across all anatomic sites. In general, life-threatening chronic  
8  
9 conditions, such as AMI, COPD, heart failure and colorectal/lung/endometrial cancers  
10  
11 were associated with a lower risk of TR in a range of 15-60% below control possibly due  
12  
13 to constrained physical activity and/or shortened life span. Notably, diabetes and chronic  
14  
15 renal disease, previously reported as risk factors for TR,[33,34] exhibited no increased  
16  
17 TR risk. Mobility impairments had reduced risk of TR similar to that of the severe life-  
18  
19 threatening conditions, likely due to reduced activity. Most conditions with low life  
20  
21 threatening conditions, likely due to reduced activity. Most conditions with low life  
22  
23 threats such as cataract, glaucoma, depression, asthma, hyperlipidemia, hypertension,  
24  
25 prostatic hyperplasia, migraine/other chronic headache, and deafness/hearing impairment  
26  
27 exhibited risks of 8 to 34% *above* controls probably for reasons related to longer life  
28  
29 spans and less inhibited activity. Ischemic heart did not fit the mold of sicker equals  
30  
31 lower TR risk. Patients with rheumatoid arthritis/osteoarthritis were a special case and  
32  
33 had TR risk of 184% *above* control possibly due to joint and associated tendon  
34  
35 inflammation with these disorders. Fibromyalgia/chronic pain and fatigue also exhibited  
36  
37 a 39% increased risk of TR possibly also due to an inflammatory component.  
38  
39  
40  
41  
42

43 The Achilles tendon carries the full force of the extra weight carried by obese patients  
44  
45 and obesity was associated with a significant (13%) increase in Achilles TR ruptures  
46  
47 while its effect on other TR classes was significant but miniscule (2-3%) (Data not  
48  
49 shown).  
50  
51

### 52 53 ***Effect of antibiotics*** 54 55 56 57

1  
2  
3 We report HRs from our primary analysis in tables separate from the non-antibiotic  
4 covariates. Table 3 shows the risk associated with each study antibiotic broken down by  
5  
6 time lag between the antibiotic use and the TRs (separate rows), and by all TRs together  
7  
8 and separately by anatomic sites (in columns). We also report HRs of death (competing  
9  
10 risk). We used multiplicity corrected p-values to simultaneously test the difference of  
11  
12 pairs of antibiotics to minimize the chance of finding statistically significant difference  
13  
14 by random chance.[35] Of the total 34,880 patients with any TR occurrence, complete  
15  
16 rupture of rotator cuff represented the major share (80.5%), followed by other TRs  
17  
18 (16.9%) and Achilles TR (2.6%). In the survival analysis, we followed patients until the  
19  
20 first occurrence of TR; so, these figures count only the first TR occurrence independent  
21  
22 of anatomic site.  
23  
24  
25  
26  
27  
28

29 Of the non-FQ antibiotics, AMX exhibited a reduced risk of TR compared to no AMX in  
30  
31 every tendon class and time window, similar to its low risk in previous studies. It  
32  
33 exhibited a significantly lower risk in the  $\leq 30$ -day window except for the Achilles  
34  
35 tendon. AZM and AMC exhibited a similar benign risk in all time windows except for  
36  
37 TR of rotator cuff in  $>60$ -day window. LEX was the surprise non-FQ antibiotic. It  
38  
39 exhibited modest to large *increased* TR risk at  $\leq 30$ -day window across all sites ranging  
40  
41 from a low of 19% increase for complete rupture of rotator cuff to a high 93% increase  
42  
43 for Achilles TR. Its risk was also significantly higher at  $\leq 30$ -day window for all TRs  
44  
45 taken together.  
46  
47  
48  
49

50  
51 Of the FQs, CIP and MXF, the most and least frequently prescribed FQ, exhibited little to  
52  
53 no increased risk of TR within each anatomic site and each time frame. LVX is the only  
54  
55 FQ to exhibit a significant *increase* in TR risk - of 16%, and 120% for rupture of rotator  
56  
57



1  
2  
3 cuff and Achilles TR respectively in the  $\leq 30$ -day window. Notably, the risk of LVX  
4  
5 never exceeded the risk of the non-FQ, LEX in any comparison.  
6  
7

8  
9 In a post-hoc analysis (Table 4), we compared the TR risk of each antibiotic with every  
10  
11 other antibiotic (pairwise comparisons of FQ vs. FQ and FQ vs. non-FQ), for  $\leq 30$ -day  
12  
13 window and FQs as a class vs. each non-FQ after combining the data from the three time  
14  
15 windows. These results paralleled the above-mentioned risk for each study antibiotic in  
16  
17 Table 3. Again, TR risk for LVX was greater than that of CIP, MXF, AMC, AMX, and  
18  
19 AZM in a  $\leq 30$ -day window. However, LVX risk was comparable to that of LEX for  
20  
21 Achilles TR, and rupture of rotator cuff and significantly lower than LEX for the other  
22  
23 TR classes. When comparing the risk of FQs as a class against that of non-FQ antibiotics,  
24  
25 most of the non-FQ antibiotics had significantly greater risk than the FQ class as a whole  
26  
27 across all TR sites (See last 4 rows of Table 4).  
28  
29  
30  
31

32  
33 In another analysis evaluating risk of death for each antibiotics, each FQ antibiotic  
34  
35 exhibited a significant increase in death risk of – 46% (for CIP), 105% (for MXF) and  
36  
37 119% (for LVX) in a  $\leq 30$ -day window. Among non-FQ antibiotics, only AMC exhibited  
38  
39 37% increased risk of death in a  $\leq 30$ -day window. Overall, risk of death for FQs as a  
40  
41 class far outweighed that of each non-FQ antibiotics.  
42  
43  
44  
45  
46  
47

## 48 **Discussion**

49  
50 Our results conflict with the common assertion that the Achilles tendon rupture is the  
51  
52 most common tendon rupture (up to 90% in one report[36]). In our elderly cohort,  
53  
54 Achilles TRs were a tiny, 2.6%, of all TRs. Some of this difference may be explained by  
55  
56  
57

1  
2  
3 the differences in demographics. Reports of high prevalence of Achilles TR came from  
4 studies of young military populations.[37,38] In contrast, our data came from an elderly  
5 Medicare population. Some of the difference could also be due to less ability to diagnose  
6 non-Achilles tendon ruptures until MRI joint imaging became widely available, because  
7 such TRs are less amenable to diagnosis by physical exam.  
8  
9  
10  
11  
12  
13

14  
15  
16  
17 Many authorities describe the relationship between FQs and TRs as a class “effect”.

18  
19 However, FQs as a class had no significant risk of TR compared with each of the four  
20 non-FQ antibiotics in any time window. CIP (n=234,994 subjects) is the oral FQ with the  
21 greatest use and with a greater effect on metalloproteases than other FQs.[39–41]  
22  
23

24  
25 However, neither MXF (n= 14,728 subjects) nor CIP had any TR risk at any anatomic  
26 site in any time window. CIP’s lack of risk is consistent with two studies[5,9] in which  
27 CIP exhibited zero risk or small risks compared to ofloxacin, a racemic mixture whose  
28 active ingredient is the levo-isomer, LVX. We do see a strong association between LVX  
29 and TRs whether we used no LVX or three of the non-FQ antibiotics as controls.  
30  
31  
32

33  
34  
35  
36 However, when we used LEX, a cephalosporin, as the control for LVX’s effect on TRs,  
37 we saw no increased risk.  
38  
39  
40  
41  
42  
43

44  
45 As noted in the introduction, the FDA has added a black box warning about tendon  
46 ruptures to the labels of fluoroquinolones. A 2015 paper[42] described the evidence for  
47 this decision based on the FDA’s Adverse Event Reporting System (FAERS) database  
48 and an empirical Bayes geometric mean (EBGM) score, which is based on the relative  
49 frequency of spontaneous report about a given adverse event in one drug versus the  
50  
51  
52  
53  
54  
55  
56  
57  
58  
59  
60

1  
2  
3 reporting of that adverse event across all drugs. This EBGM score based upon FAERS  
4 database has been useful but FAERS database is still limited by a lack of true  
5  
6 denominator for population at risk, underreporting due to a voluntary reporting scheme  
7  
8 and bias due to limited adjustment variables.[43] Our study was based on a well-defined  
9  
10 Medicare population with 80 variable adjustments. The fact that levofloxacin's EBGM  
11  
12 score was six times that of ofloxacin[42] though both drugs have the same active  
13  
14 ingredient (the levo-isomer of ofloxacin) and the same dose of that ingredient, raises  
15  
16 questions about what factors influenced that score.  
17  
18  
19  
20  
21  
22  
23

24 One previous study described the effect of FQs on TR risk as small and unimportant.[10]  
25  
26 Two studies reported no effect of FQs on TR risk.[9,11] At least 7 observational studies  
27  
28 reported that the use of FQs increased risks of TR.[3–8,12] However, in all but one study,  
29  
30 the number of TRs among patients taking an FQs was small (between 5 and 111). In  
31  
32 comparison, our study included 12,517 (3.8%) such patients. One previous study did  
33  
34 report a large number of TR events, 23,000 (3.5%) patients while on FQs and, like our  
35  
36 study, it focused exclusively on elderly patients.[3] However, it did not compare the  
37  
38 population of FQ users against non-users but FQ usage periods against non-usage periods  
39  
40 in the same set of patients, which were likely periods without visits and thus could not  
41  
42 account for the effect of increased clinical attention provided at visits requiring a strong  
43  
44 systemic antibiotic. Furthermore, they assessed the association between AMX and TRs in  
45  
46 separate analysis and used the risk of TRs in that analysis as the comparator for the risk  
47  
48 observed in the FQ analysis. Finally, their analysis did not include death as a competing  
49  
50  
51  
52  
53  
54  
55  
56  
57  
58  
59  
60

1  
2  
3 risk as is recommend when death rates exceed event rates[23] which was likely the case  
4  
5 because in the demographics of their study was very similar to ours.  
6  
7  
8  
9

10 In our study, AMX treated patients exhibited a similar absolute risk of TR as to LVX  
11 treated patients (7.56 vs. 7.47 per 1000 patient-years). However, they had fewer  
12 comorbidities (as in Daneman's study), almost 14% fewer hospitalizations and half of  
13 death rate, compared to patients taking LVX (7.56 vs. 18.50 per 1000 patient-years). So  
14 the two populations are not comparable. LVX exhibited 119% increased risk of death in a  
15  $\leq 30$ -day window. They appears to be reserved for more severe infections or more fragile  
16 patients and thus subject to differential biases.  
17  
18  
19  
20  
21  
22  
23  
24  
25  
26  
27

28 The reported activation of metalloprotease activity by FQs has underpinned the idea of a  
29 causal link between FQs and TRs. The argument goes as follows: FQs stimulate  
30 metalloproteases, which can break down collagen; the tendon is made of collagen; so FQs  
31 may cause TRs. However, our data disrupts this argument. CIP which strongly *stimulates*  
32 metalloprotease activity,[17,18] exhibited *no* risk of TRs in our study, and LEX which  
33 *inhibits* metalloprotease activity[44,45] exhibited a *large* risk. So we have to question  
34 whether metalloprotease activity has any relevance to TR risk, and consider other  
35 explanations for the observed associations.  
36  
37  
38  
39  
40  
41  
42  
43  
44  
45  
46  
47  
48

49 The indication for an antibiotic is a presumed bacterial infection. The reported  
50 associations between antibiotics and TR could be a consequence of the indication  
51 (infection) rather than the antibiotic use to treat it. It could be a perfects example of the  
52  
53  
54  
55  
56  
57  
58  
59  
60

1  
2  
3 confounding by indication.[46] Such a bias could explain many reported associations  
4  
5 between drugs and TR risk including associations with non-antibiotic drugs reported by  
6  
7 Nyyssönen.[8]  
8  
9

10  
11  
12 This indication (and infection) bias could generate an association between the antibiotic  
13  
14 and TRs in different ways. First, the bacterial infection might directly increase the risk of  
15  
16 TR via stimulation of general immune or cytokine responses, or even by direct bacterial  
17  
18 invasion. A recent study found gram-positive bacteria in a major share of ruptured  
19  
20 tendons but not in “control” tendons removed surgically for grafting,[47] So the  
21  
22 possibility of direct invasion of tendons by circulating bacteria with subsequent  
23  
24 weakening and rupture is plausible.  
25  
26  
27  
28  
29

30  
31 Secondly, the greater clinical attention likely focused on patients needing systemic  
32  
33 antibiotics, especially those with more severe infections, could increase the chance of  
34  
35 noticing and documenting a pre-existing TR. A reservoir of not-yet-diagnosed such cases  
36  
37 is likely to exist, because patients do not necessarily correctly identify joint and extremity  
38  
39 symptoms as TRs and seek immediate care for them. Tendon ruptures of the shoulder  
40  
41 capsule, for example, are notorious for developing symptoms slowly over 2-3 years[48]  
42  
43 before being correctly diagnosed. Even Achilles tendon ruptures, can be missed (in 30%  
44  
45 of cases) at the first presentation.[49] Seeger et al. reviewed the medical records of  
46  
47 patients with an insurance claim reporting TRs following antibiotic use and found that  
48  
49 nearly half of the TRs recorded in the claims were either something else (e.g., Bursa  
50  
51  
52  
53  
54  
55  
56  
57  
58  
59  
60

1  
2  
3 inflammation miscoded as a TR) or had occurred pre antibiotic use but only seen in a  
4 claim post antibiotic use.[11]  
5  
6  
7  
8  
9

10 Indication bias is a plausible explanations for associations reported in observational  
11 studies and it should be considered more often before assuming the associations are  
12 causal.  
13  
14  
15

### 16 17 18 19 **Limitation**

20 This study faces all of the limitations of observational studies. Furthermore, it applies  
21 only to fee-for-service Medicare populations. In addition, we had no options to verify  
22 claims diagnoses via chart review. From a statistical point of view, our findings may have  
23 some limitations. First, we included 80 covariates in one analysis and concern about  
24 possibly strong intercorrelation affecting the validity could exist. To evaluate the  
25 intercorrelation among covariates, we calculated an 80x80 correlation matrix of estimated  
26 regression coefficients from our competing risk regression analysis considering their  
27 time-varying nature. The correlation matrix can deliver information about the strength of  
28 all pairwise correlation and indicate the existence of a collinear relationship between two  
29 predictors. All correlations (except diagonal elements) were below 0.5, only 1.6% were  
30 between 0.2 and 0.5. The largest of the pairwise correlations was 0.33 indicating minimal  
31 bias due to intercorrelation. We also did not consider interactions among covariates in our  
32 analysis because of the enormous number of two way interactions (as large as 6,400) and  
33 thus the problem of overfitting.  
34  
35  
36  
37  
38  
39  
40  
41  
42  
43  
44  
45  
46  
47  
48  
49  
50  
51  
52  
53  
54  
55  
56  
57  
58  
59  
60

### **Funding Statement**

This study is supported by the Intramural Research Program of the National Library of Medicine, National Institutes of Health.

### **Competing interests Statement**

All authors have no competing interest to declare.

### **Contributorship Statement**

SB: study conception, design, analysis and interpretation; critical review of study content; manuscript drafting; approval of the final manuscript. JL: study concept and interpretation; manuscript drafting; approval of the final manuscript. VH: study interpretation; manuscript drafting; approval of the final manuscript. CJM: study conception, design and interpretation; critical review of study content; manuscript drafting; approval of the final manuscript.

### **Data availability**

The authors confirm that the data supporting the findings of this study are available within the article [and/or] its supplementary materials.

**Patient Consent for publication:** Not required.

## Acknowledgements

Jason Lau was with National Institutes of Health (NIH) during this work and now he is with the UC Davis Health.

This work was partially supported by the Intramural Research Program of the National Library of Medicine, National Institutes of Health.

This research was made possible through the National Institutes of Health (NIH) Medical Research Scholars Program, a public-private partnership supported jointly by the NIH and generous contributions to the Foundation for the NIH from the Doris Duke Charitable Foundation, Genentech, the American Association for Dental Research, the Colgate-Palmolive Company, Elsevier, alumni of student research programs, and other individual supporters via contributions to the Foundation for the National Institutes of Health. For a complete list, please visit the Foundation website at: <http://fnih.org/what-we-do/current-education-and-training-programs/mrsp>



## References

- 1 Hicks LA, Bartoces MG, Roberts RM, *et al.* US outpatient antibiotic prescribing variation according to geography, patient population, and provider specialty in 2011. *Clin Infect Dis* 2015;**60**:1308–16. doi:10.1093/cid/civ076
- 2 Magill SS, Edwards JR, Beldavs ZG, *et al.* Prevalence of Antimicrobial Use in US Acute Care Hospitals, May-September 2011. *JAMA* 2014;**312**:1438. doi:10.1001/jama.2014.12923
- 3 Daneman N, Lu H, Redelmeier DA. Fluoroquinolones and collagen associated severe adverse events: a longitudinal cohort study. *BMJ Open* 2015;**5**:e010077. doi:10.1136/bmjopen-2015-010077
- 4 Morales DR, Slattery J, Pacurariu A, *et al.* Relative and Absolute Risk of Tendon Rupture with Fluoroquinolone and Concomitant Fluoroquinolone/Corticosteroid Therapy: Population-Based Nested Case–Control Study. *Clin Drug Investig* 2019;**39**:205–13. doi:10.1007/s40261-018-0729-y
- 5 van der Linden PD, Sturkenboom MCJM, Herings RMC, *et al.* Increased Risk of Achilles Tendon Rupture With Quinolone Antibacterial Use, Especially in Elderly Patients Taking Oral Corticosteroids. *Arch Intern Med* 2003;**163**:1801. doi:10.1001/archinte.163.15.1801
- 6 Wise BL, Peloquin C, Choi H, *et al.* Impact of age, sex, obesity, and steroid use on quinolone-associated tendon disorders. *Am J Med* 2012;**125**:1228.e23-1228.e28. doi:10.1016/j.amjmed.2012.05.027
- 7 Sode J, Obel N, Hallas J, *et al.* Use of fluoroquinolone and risk of Achilles tendon rupture: a population-based cohort study. *Eur J Clin Pharmacol* 2007;**63**:499–503.

- 1  
2  
3 doi:10.1007/s00228-007-0265-9  
4  
5  
6 8 Nyysönen T, Lantto I, Lüthje P, *et al.* Drug treatments associated with Achilles tendon  
7  
8 rupture. A case-control study involving 1118 Achilles tendon ruptures. *Scand J Med Sci*  
9  
10 *Sports* 2018;**28**:2625–9. doi:10.1111/sms.13281  
11  
12 9 WILTON L V., PEARCE GL, MANN RD. A comparison of ciprofloxacin, norfloxacin,  
13  
14 ofloxacin, azithromycin and cefixime examined by observational cohort studies. *Br J Clin*  
15  
16 *Pharmacol* 2003;**41**:277–84. doi:10.1046/j.1365-2125.1996.03013.x  
17  
18  
19 10 Jupiter DC, Fang X, Ashmore Z, *et al.* The Relative Risk of Achilles Tendon Injury in  
20  
21 Patients Taking Quinolones. *Pharmacother J Hum Pharmacol Drug Ther* 2018;**38**:878–  
22  
23 87. doi:10.1002/phar.2162  
24  
25  
26 11 Seeger JD, West WA, Fife D, *et al.* Achilles tendon rupture and its association with  
27  
28 fluoroquinolone antibiotics and other potential risk factors in a managed care population.  
29  
30 *Pharmacoepidemiol Drug Saf* 2006;**15**:784–92. doi:10.1002/pds.1214  
31  
32  
33 12 Hori K, Yamakawa K, Yoshida N, *et al.* Detection of fluoroquinolone-induced tendon  
34  
35 disorders using a hospital database in Japan. *Pharmacoepidemiol Drug Saf* 2012;**21**:886–  
36  
37 9. doi:10.1002/pds.3285  
38  
39  
40 13 Tanne JH. FDA adds ‘black box’ warning label to fluoroquinolone antibiotics. *BMJ*  
41  
42 2008;**337**:a816. doi:10.1136/bmj.a816  
43  
44  
45 14 Food and Drug Administration. FDA Drug Safety Communication: FDA advises  
46  
47 restricting fluoroquinolone antibiotic use for certain uncomplicated infections; warns  
48  
49 about disabling side effects that can occur together | FDA.  
50  
51 [https://www.fda.gov/drugs/drug-safety-and-availability/fda-drug-safety-communication-](https://www.fda.gov/drugs/drug-safety-and-availability/fda-drug-safety-communication-fda-advises-restricting-fluoroquinolone-antibiotic-use-certain)  
52  
53 [fda-advises-restricting-fluoroquinolone-antibiotic-use-certain](https://www.fda.gov/drugs/drug-safety-and-availability/fda-drug-safety-communication-fda-advises-restricting-fluoroquinolone-antibiotic-use-certain) (accessed 12 Jun 2019).  
54  
55  
56  
57  
58  
59  
60

- 1  
2  
3 15 Food and Drug Administration. FDA Drug Safety Communication: FDA updates  
4 warnings for oral and injectable fluoroquinolone antibiotics due to disabling side effects |  
5  
6 FDA. [https://www.fda.gov/drugs/drug-safety-and-availability/fda-drug-safety-](https://www.fda.gov/drugs/drug-safety-and-availability/fda-drug-safety-communication-fda-updates-warnings-oral-and-injectable-fluoroquinolone-antibiotics)  
7  
8 communication-fda-updates-warnings-oral-and-injectable-fluoroquinolone-antibiotics  
9  
10 (accessed 12 Jun 2019).  
11  
12  
13  
14  
15 16 Del Buono A, Oliva F, Osti L, *et al.* Metalloproteases and tendinopathy. *Muscles*  
16  
17 *Ligaments Tendons J* 2013;**3**:51–7. doi:10.11138/mltj/2013.3.1.051  
18  
19  
20 17 Tsai WC, Hsu CC, Chen CPC, *et al.* Ciprofloxacin up-regulates tendon cells to express  
21  
22 matrix metalloproteinase-2 with degradation of type i collagen. *J Orthop Res* 2011;**29**:67–  
23  
24 73. doi:10.1002/jor.21196  
25  
26  
27 18 Corps AN, Harrall RL, Curry VA, *et al.* Ciprofloxacin enhances the stimulation of matrix  
28  
29 metalloproteinase 3 expression by interleukin-1 $\beta$  in human tendon-derived cells: A  
30  
31 potential mechanism of fluoroquinolone-induced tendinopathy. *Arthritis Rheum*  
32  
33 2002;**46**:3034–40. doi:10.1002/art.10617  
34  
35  
36 19 CMS Virtual Research Data Center (VRDC) | ResDAC. [https://www.resdac.org/cms-](https://www.resdac.org/cms-virtual-research-data-center-vrdc)  
37  
38 virtual-research-data-center-vrdc (accessed 4 Oct 2019).  
39  
40  
41 20 Cubanski J, Swoope C, Boccuti C, *et al.* A Primer on Medicare. 2015.  
42  
43 [http://files.kff.org/attachment/report-a-primer-on-medicare-key-facts-about-the-medicare-](http://files.kff.org/attachment/report-a-primer-on-medicare-key-facts-about-the-medicare-program-and-the-people-it-covers)  
44  
45 program-and-the-people-it-covers (accessed 7 Feb 2019).  
46  
47  
48 21 Johnson ES, Bartman BA, Briesacher BA, *et al.* The incident user design in comparative  
49  
50 effectiveness research. *Pharmacoepidemiol Drug Saf* 2013;**22**:1–6. doi:10.1002/pds.3334  
51  
52  
53 22 Fine JP, Gray RJ. A Proportional Hazards Model for the Subdistribution of a Competing  
54  
55 Risk. *J Am Stat Assoc* 1999;**94**:496. doi:10.2307/2670170  
56  
57  
58  
59  
60

- 1  
2  
3 23 Berry SD, Ngo L, Samelson EJ, *et al.* Competing risk of death: An important  
4 consideration in studies of older adults. *J Am Geriatr Soc* 2010;**58**:783–7.  
5  
6 doi:10.1111/j.1532-5415.2010.02767.x  
7  
8  
9  
10 24 Putter H, Fiocco M, Geskus RB. Tutorial in biostatistics: competing risks and multi-state  
11 models. *Stat Med* 2007;**26**:2389–430. doi:10.1002/sim.2712  
12  
13  
14 25 The Medicare Payment Advisory Commission. MedPAC Data book: Beneficiaries dually  
15 eligible for Medicare and Medicaid - January 2016. 2016.  
16  
17 [http://www.medpac.gov/docs/default-source/publications/january-2016-medpac-and-](http://www.medpac.gov/docs/default-source/publications/january-2016-medpac-and-macpac-data-book-beneficiaries-dually-eligible-for-medicare-and-medicaid.pdf?sfvrsn=0)  
18  
19 [macpac-data-book-beneficiaries-dually-eligible-for-medicare-and-medicaid.pdf?sfvrsn=0](http://www.medpac.gov/docs/default-source/publications/january-2016-medpac-and-macpac-data-book-beneficiaries-dually-eligible-for-medicare-and-medicaid.pdf?sfvrsn=0)  
20  
21 (accessed 23 Jan 2017).  
22  
23  
24  
25  
26 26 The Chronic Condition Warehouse. Chronic Conditions Data Warehouse: CCW Chronic  
27 Condition Algorithms. <https://www.ccwdata.org/web/guest/condition-categories> (accessed  
28  
29 23 Jan 2017).  
30  
31  
32  
33 27 Stricker BHC, Stijnen T. Analysis of individual drug use as a time-varying determinant of  
34 exposure in prospective population-based cohort studies. *Eur J Epidemiol* 2010;**25**:245–  
35  
36 51. doi:10.1007/s10654-010-9451-7  
37  
38  
39  
40 28 Shariff SZ, Cuerden MS, Jain AK, *et al.* The secret of immortal time bias in  
41 epidemiologic studies. *J Am Soc Nephrol* 2008;**19**:841–3. doi:10.1681/ASN.2007121354  
42  
43  
44 29 Shintani AK, Girard TD, Eden SK, *et al.* Immortal time bias in critical care research:  
45 application of time-varying Cox regression for observational cohort studies. *Crit Care*  
46  
47 *Med* 2009;**37**:2939–45. doi:10.1097/CCM.0b013e3181b7fbbb  
48  
49  
50  
51 30 Rosenbaum PR, Rubin DB. The Central Role of the Propensity Score in Observational  
52  
53  
54  
55  
56  
57  
58  
59  
60

- 1  
2  
3 31 Austin PC. An Introduction to Propensity Score Methods for Reducing the Effects of  
4 Confounding in Observational Studies. *Multivariate Behav Res* 2011;**46**:399–424.  
5  
6 doi:10.1080/00273171.2011.568786  
7  
8  
9  
10 32 Austin PC, Stuart EA. The performance of inverse probability of treatment weighting and  
11 full matching on the propensity score in the presence of model misspecification when  
12 estimating the effect of treatment on survival outcomes. *Stat Methods Med Res*  
13 2017;**26**:1654–70. doi:10.1177/0962280215584401  
14  
15  
16  
17  
18 33 Zakaria MHB, Davis WA, Davis TME. Incidence and predictors of hospitalization for  
19 tendon rupture in Type 2 diabetes: the Fremantle Diabetes Study. *Diabet Med*  
20 2014;**31**:425–30. doi:10.1111/dme.12344  
21  
22  
23  
24  
25 34 Basic-Jukic N, Juric I, Racki S, *et al.* Spontaneous tendon ruptures in patients with end-  
26 stage renal disease. *Kidney Blood Press Res* 2009;**32**:32–6. doi:10.1159/000201792  
27  
28  
29  
30 35 Jafari M, Ansari-Pour N. Why, when and how to adjust your P values? *Cell J*  
31 2019;**20**:604–7. doi:10.22074/cellj.2019.5992  
32  
33  
34 36 Khaliq Y, Zhanel GG. Fluoroquinolone-Associated Tendinopathy: A Critical Review of  
35 the Literature. *Clin Infect Dis* 2003;**36**:1404–10. doi:10.1086/375078  
36  
37  
38 37 White DW, Wenke JC, Mosely DS, *et al.* Incidence of Major Tendon Ruptures and  
39 Anterior Cruciate Ligament Tears in US Army Soldiers. *Am J Sports Med* 2007;**35**:1308–  
40 14. doi:10.1177/0363546507301256  
41  
42  
43  
44  
45 38 Owens B, Mountcastle S, White D. Racial Differences in Tendon Rupture Incidence. *Int J*  
46 *Sports Med* 2007;**28**:617–20. doi:10.1055/s-2007-964837  
47  
48  
49  
50 39 Corps AN, Harrall RL, Curry VA, *et al.* Contrasting effects of fluoroquinolone antibiotics  
51 on the expression of the collagenases, matrix metalloproteinases (MMP)-1 and -13, in  
52  
53  
54  
55  
56  
57  
58  
59  
60

- 1  
2  
3 human tendon-derived cells. *Rheumatology* 2005;**44**:1514–7.  
4  
5 doi:10.1093/rheumatology/kei087  
6  
7  
8 40 Sharma C, Velpandian T, Baskar Singh S, *et al.* Effect of fluoroquinolones on the  
9  
10 expression of matrix metalloproteinase in debrided cornea of rats. *Toxicol Mech Methods*  
11  
12 2011;**21**:6–12. doi:10.3109/15376516.2010.529183  
13  
14  
15 41 Sbardella D, Tundo G, Fasciglione G, *et al.* Role of Metalloproteinases in Tendon  
16  
17 Pathophysiology. *Mini-Reviews Med Chem* 2014;**14**:978–87.  
18  
19 doi:10.2174/1389557514666141106132411  
20  
21  
22 42 Arabyat RM, Raisch DW, McKoy JM, *et al.* Fluoroquinolone-associated tendon-rupture: a  
23  
24 summary of reports in the Food and Drug Administration’s adverse event reporting  
25  
26 system. *Expert Opin Drug Saf* 2015;**14**:1653–60. doi:10.1517/14740338.2015.1085968  
27  
28  
29 43 Sakaeda T, Tamon A, Kadoyama K, *et al.* Data mining of the public version of the FDA  
30  
31 Adverse Event Reporting System. *Int J Med Sci* 2013;**10**:796–803. doi:10.7150/ijms.6048  
32  
33  
34 44 Santavirta S, Takagi M, Kontinen YT, *et al.* Inhibitory effect of cephalothin on matrix  
35  
36 metalloproteinase activity around loose hip prostheses. *Antimicrob Agents Chemother*  
37  
38 1996;**40**:244–6. doi:10.1128/AAC.40.1.244  
39  
40  
41 45 Kannan R, Ruff M, Kochins JG, *et al.* Purification of Active Matrix Metalloproteinase  
42  
43 Catalytic Domains and Its Use for Screening of Specific Stromelysin-3 Inhibitors. *Protein*  
44  
45 *Expr Purif* 1999;**16**:76–83. doi:10.1006/PREP.1999.1068  
46  
47  
48 46 de Koning JS, Klazinga NS, Koudstaal PJ, *et al.* The role of ‘confounding by indication’  
49  
50 in assessing the effect of quality of care on disease outcomes in general practice: results of  
51  
52 a case-control study. *BMC Health Serv Res* 2005;**5**:10. doi:10.1186/1472-6963-5-10  
53  
54  
55 47 Rolf CG, Fu S-C, Hopkins C, *et al.* Presence of Bacteria in Spontaneous Achilles Tendon  
56  
57  
58  
59  
60

1  
2  
3 Ruptures. *Am J Sports Med* 2017;**45**:2061–7. doi:10.1177/0363546517696315

4  
5 48 Tashjian RZ. Epidemiology, Natural History, and Indications for Treatment of Rotator

6  
7 Cuff Tears. *Clin Sports Med* 2012;**31**:589–604. doi:10.1016/J.CSM.2012.07.001

8  
9 49 Christensen I. Rupture of the Achilles tendon; analysis of 57 cases. *Acta Chir Scand*

10  
11 1953;**106**:50–60.  
12  
13  
14  
15  
16  
17  
18  
19  
20  
21  
22  
23  
24  
25  
26  
27  
28  
29  
30  
31  
32  
33  
34  
35  
36  
37  
38  
39  
40  
41  
42  
43  
44  
45  
46  
47  
48  
49  
50  
51  
52  
53  
54  
55  
56  
57  
58  
59  
60

1  
2  
3 **Figure 1. Consort Diagram**  
4  
5  
6  
7  
8  
9  
10  
11  
12  
13  
14  
15  
16  
17  
18  
19  
20  
21  
22  
23  
24  
25  
26  
27  
28  
29  
30  
31  
32  
33  
34  
35  
36  
37  
38  
39  
40  
41  
42  
43  
44  
45  
46  
47  
48  
49  
50  
51  
52  
53  
54  
55  
56  
57  
58  
59  
60

For peer review only



**Table 1. Outcome, Medical/Medication Use, Diseases and Patient Characteristics by Type of Antibiotics**

| Variable                                 | Overall         | FLQ             | CIP             | LVX             | MXF             | AMX             | AZM             | LEX             | AMC             | None           |
|------------------------------------------|-----------------|-----------------|-----------------|-----------------|-----------------|-----------------|-----------------|-----------------|-----------------|----------------|
| N                                        | 1,009,925       | 328,654         | 234,994         | 155,991         | 14,728          | 259,125         | 308,985         | 195,731         | 179,616         | 356,364        |
| Tendon Rupture                           | 34,880(3.5)     | 12,517(3.8)     | 8,811(3.7)      | 5,904(3.8)      | 770(5.2)        | 9,636(3.7)      | 12,448(4.0)     | 8,019(4.1)      | 6,622(3.7)      | 10,169(2.9)    |
| Death                                    | 46,468(4.6)     | 23,249(7.1)     | 14,821(6.3)     | 14,610(9.4)     | 2,136(14.5)     | 9,632(3.7)      | 14,608(4.7)     | 11,394(5.8)     | 9,951(5.5)      | 13,645(3.8)    |
| Censored at HMO entry                    | 127,162(12.6)   | 27,573(8.4)     | 19,847(8.4)     | 11,142(7.1)     | 1,571(10.7)     | 21,215(8.2)     | 26,140(8.5)     | 14,887(7.6)     | 12,674(7.1)     | 65,886(18.5)   |
| Censored at disenrollment                | 145(0.0)        | 25(0.0)         | 13(0.0)         | 13(0.0)         | 2(0.0)          | 19(0.0)         | 27(0.0)         | 23(0.0)         | 16(0.0)         | 85(0.0)        |
| Censored at Dec 31 2016                  | 801,270(79.3)   | 265,290(80.7)   | 191,502(81.5)   | 124,322(79.7)   | 10,249(69.6)    | 218,623(84.4)   | 255,762(82.8)   | 161,408(82.5)   | 150,353(83.7)   | 266,579(74.8)  |
| Years of follow-up, median(total)        | 3.6(4,030,897)  | 4.6(1,620,894)  | 4.8(1,190,308)  | 4.8(789,849)    | 6.0(87,397)     | 4.5(1,274,357)  | 4.6(1,529,370)  | 4.8(1,000,459)  | 4.6(890,340)    | 2.5(1,067,731) |
| Tendon rupture, 1000 person-years        | 8.65            | 7.72            | 7.40            | 7.47            | 8.81            | 7.56            | 8.14            | 8.02            | 7.44            | 9.52           |
| Death, 1000 person-years                 | 11.53           | 14.34           | 12.45           | 18.50           | 24.44           | 7.56            | 9.55            | 11.39           | 11.18           | 12.78          |
| Female                                   | 575,885(57.0)   | 197,915(60.2)   | 146,745(62.4)   | 89,682(57.5)    | 8,747(59.4)     | 151,383(58.4)   | 194,101(62.8)   | 113,308(57.9)   | 104,749(58.3)   | 191,069(53.6)  |
| White                                    | 814,933(80.7)   | 274,785(83.6)   | 196,048(83.4)   | 131,725(84.4)   | 12,464(84.6)    | 215,101(83.0)   | 259,657(84.0)   | 167,825(85.7)   | 153,723(85.6)   | 271,906(76.3)  |
| Black                                    | 75,930(7.5)     | 20,017(6.1)     | 14,286(6.1)     | 8,893(5.7)      | 956(6.5)        | 15,622(6.0)     | 17,296(5.6)     | 9,625(4.9)      | 9,199(5.1)      | 35,023(9.8)    |
| Hispanic                                 | 56,582(5.6)     | 17,044(5.2)     | 12,607(5.4)     | 7,943(5.1)      | 628(4.3)        | 12,494(4.8)     | 14,805(4.8)     | 8,976(4.6)      | 7,802(4.3)      | 24,391(6.8)    |
| Asian                                    | 26,336(2.6)     | 7,316(2.2)      | 5,362(2.3)      | 3,144(2.0)      | 356(2.4)        | 7,624(2.9)      | 7,945(2.6)      | 3,539(1.8)      | 3,440(1.9)      | 10,437(2.9)    |
| Other                                    | 36,144(3.6)     | 9,492(2.9)      | 6,691(2.8)      | 4,286(2.7)      | 324(2.2)        | 8,284(3.2)      | 9,282(3.0)      | 5,766(2.9)      | 5,452(3.0)      | 14,607(4.1)    |
| Ever Dual                                | 162,988(16.1)   | 54,055(16.4)    | 38,277(16.3)    | 28,156(18.0)    | 2,908(19.7)     | 35,305(13.6)    | 44,940(14.5)    | 30,962(15.8)    | 25,255(14.1)    | 66,986(18.8)   |
| Non-Dual LIS                             | 26,955(2.7)     | 7,648(2.3)      | 5,459(2.3)      | 3,746(2.4)      | 385(2.6)        | 5,224(2.0)      | 6,828(2.2)      | 4,191(2.1)      | 3,818(2.1)      | 12,595(3.5)    |
| Non-Dual No LIS                          | 819,982(81.2)   | 266,951(81.2)   | 191,258(81.4)   | 124,089(79.5)   | 11,435(77.6)    | 218,596(84.4)   | 257,217(83.2)   | 160,578(82.0)   | 150,543(83.8)   | 276,783(77.7)  |
| Living in rural area                     | 228,199(22.6)   | 78,581(23.9)    | 56,385(24.0)    | 38,847(24.9)    | 2,801(19.0)     | 58,805(22.7)    | 72,282(23.4)    | 49,977(25.5)    | 42,288(23.5)    | 77,087(21.6)   |
| Days on Rx, median (IQR)                 | N/A             | N/A             | 10.0(7.0-20.0)  | 10.0(7.0-17.0)  | 10.0(7.0-12.0)  | 10.0(7.0-20.0)  | 5.0(5.0-11.0)   | 10.0(7.0-16.0)  | 10.0(10.0-20.0) | N/A            |
| Hospitalization                          | 349,959(29.5)   | 198,846(45.4)   | 142,538(45.3)   | 113,829(52.5)   | 14,002(60.3)    | 132,304(38.8)   | 156,185(37.9)   | 119,209(45.9)   | 103,515(42.5)   | 51,525(14.4)   |
| Outpatient visits per year, median (IQR) | 19.6(11.1-33.0) | 27.1(17.2-42.7) | 27.3(17.5-42.9) | 30.1(19.0-47.8) | 34.0(21.7-53.7) | 23.6(14.5-37.5) | 24.6(15.5-38.8) | 27.5(17.2-43.2) | 26.6(16.7-42.2) | 12.3(6.0-21.8) |
| AMI                                      | 21,222(2.1)     | 9,999(3.0)      | 6,810(2.9)      | 5,862(3.8)      | 698(4.7)        | 6,474(2.5)      | 8,079(2.6)      | 6,215(3.2)      | 5,292(2.9)      | 5,012(1.4)     |
| Atrial Fibrillation                      | 71,635(7.1)     | 31,752(9.7)     | 21,757(9.3)     | 17,731(11.4)    | 2,028(13.8)     | 23,974(9.3)     | 26,182(8.5)     | 21,935(11.2)    | 18,764(10.4)    | 16,314(4.6)    |
| Cataract                                 | 468,608(46.4)   | 183,870(55.9)   | 134,196(57.1)   | 88,574(56.8)    | 9,216(62.6)     | 144,455(55.7)   | 174,897(56.6)   | 112,020(57.2)   | 101,079(56.3)   | 124,931(35.1)  |
| Chronic Kidney Disease                   | 180,441(17.9)   | 86,021(26.2)    | 62,323(26.5)    | 46,121(29.6)    | 4,651(31.6)     | 53,713(20.7)    | 65,577(21.2)    | 50,361(25.7)    | 43,182(24.0)    | 42,916(12.0)   |
| COPD                                     | 130,840(13.0)   | 71,913(21.9)    | 43,961(18.7)    | 48,430(31.0)    | 6,106(41.5)     | 40,109(15.5)    | 66,536(21.5)    | 37,413(19.1)    | 37,579(20.9)    | 22,739(6.4)    |
| Heart Failure                            | 103,010(10.2)   | 51,814(15.8)    | 34,870(14.8)    | 31,377(20.1)    | 3,776(25.6)     | 32,792(12.7)    | 41,647(13.5)    | 31,585(16.1)    | 27,223(15.2)    | 21,907(6.1)    |
| Diabetes                                 | 284,919(28.2)   | 113,424(34.5)   | 81,175(34.5)    | 57,697(37.0)    | 5,942(40.3)     | 81,155(31.3)    | 98,176(31.8)    | 67,548(34.5)    | 59,984(33.4)    | 81,448(22.9)   |
| Glaucoma                                 | 150,839(14.9)   | 56,990(17.3)    | 41,984(17.9)    | 26,603(17.1)    | 2,930(19.9)     | 45,597(17.6)    | 54,726(17.7)    | 33,936(17.3)    | 31,065(17.3)    | 42,355(11.9)   |
| Hip/Pelvic Fracture                      | 7,982(0.8)      | 4,086(1.2)      | 3,000(1.3)      | 2,289(1.5)      | 274(1.9)        | 2,673(1.0)      | 3,005(1.0)      | 2,515(1.3)      | 1,914(1.1)      | 1,689(0.5)     |
| Ischemic Heart Disease                   | 264,648(26.2)   | 117,416(35.7)   | 82,182(35.0)    | 63,659(40.8)    | 6,956(47.2)     | 83,682(32.3)    | 101,999(33.0)   | 70,612(36.1)    | 63,363(35.3)    | 63,372(17.8)   |
| Depression                               | 210,714(20.9)   | 94,554(28.8)    | 68,625(29.2)    | 49,277(31.6)    | 5,298(36.0)     | 65,642(25.3)    | 83,253(26.9)    | 56,747(29.0)    | 51,150(28.5)    | 49,320(13.8)   |
| Alzheimer's Disease or Senile Dementia   | 39,132(3.9)     | 19,796(6.0)     | 14,309(6.1)     | 11,030(7.1)     | 1,206(8.2)      | 11,140(4.3)     | 13,809(4.5)     | 11,846(6.1)     | 9,309(5.2)      | 9,400(2.6)     |
| Osteoporosis                             | 106,966(10.6)   | 47,033(14.3)    | 35,217(15.0)    | 22,918(14.7)    | 2,738(18.6)     | 34,610(13.4)    | 44,016(14.2)    | 26,996(13.8)    | 24,393(13.6)    | 25,216(7.1)    |

|                                                       |               |               |               |               |              |               |               |               |               |               |
|-------------------------------------------------------|---------------|---------------|---------------|---------------|--------------|---------------|---------------|---------------|---------------|---------------|
| Rheumatoid Arthritis/Osteoarthritis                   | 369,584(36.6) | 160,091(48.7) | 117,018(49.8) | 80,115(51.4)  | 8,259(56.1)  | 126,702(48.9) | 148,653(48.1) | 101,310(51.8) | 88,017(49.0)  | 81,855(23.0)  |
| 1 Stroke/Transient Ischemic Attack                    | 58,886(5.8)   | 27,702(8.4)   | 19,843(8.4)   | 15,051(9.6)   | 1,670(11.3)  | 17,829(6.9)   | 22,038(7.1)   | 16,684(8.5)   | 14,245(7.9)   | 14,262(4.0)   |
| 2 Breast Cancer                                       | 45,316(4.5)   | 19,362(5.9)   | 14,344(6.1)   | 9,442(6.1)    | 984(6.7)     | 13,451(5.2)   | 17,676(5.7)   | 12,543(6.4)   | 10,156(5.7)   | 11,042(3.1)   |
| 3 Colorectal Cancer                                   | 15,905(1.6)   | 7,487(2.3)    | 5,421(2.3)    | 4,048(2.6)    | 390(2.6)     | 4,304(1.7)    | 5,170(1.7)    | 4,085(2.1)    | 3,605(2.0)    | 4,104(1.2)    |
| 4 Prostate Cancer                                     | 37,038(3.7)   | 19,705(6.0)   | 15,577(6.6)   | 9,232(5.9)    | 643(4.4)     | 10,967(4.2)   | 11,733(3.8)   | 9,252(4.7)    | 8,070(4.5)    | 8,333(2.3)    |
| 5 Lung Cancer                                         | 14,946(1.5)   | 8,965(2.7)    | 5,144(2.2)    | 6,356(4.1)    | 905(6.1)     | 3,859(1.5)    | 6,633(2.1)    | 3,977(2.0)    | 4,267(2.4)    | 2,733(0.8)    |
| 6 Endometrial Cancer                                  | 7,396(0.7)    | 3,447(1.0)    | 2,670(1.1)    | 1,635(1.0)    | 160(1.1)     | 2,095(0.8)    | 2,637(0.9)    | 1,957(1.0)    | 1,604(0.9)    | 1,847(0.5)    |
| 8 Anemia                                              | 307,310(30.4) | 140,606(42.8) | 100,819(42.9) | 74,308(47.6)  | 7,980(54.2)  | 99,190(38.3)  | 118,327(38.3) | 81,967(41.9)  | 72,587(40.4)  | 71,098(20.0)  |
| 9 Asthma                                              | 86,120(8.5)   | 46,350(14.1)  | 29,327(12.5)  | 30,152(19.3)  | 4,091(27.8)  | 27,632(10.7)  | 46,823(15.2)  | 24,426(12.5)  | 25,465(14.2)  | 13,802(3.9)   |
| 10 Hyperlipidemia                                     | 691,148(68.4) | 257,086(78.2) | 185,199(78.8) | 123,828(79.4) | 12,162(82.6) | 199,236(76.9) | 239,414(77.5) | 152,879(78.1) | 140,364(78.1) | 201,258(56.5) |
| 11 Hyperplasia                                        | 122,010(12.1) | 59,809(18.2)  | 45,517(19.4)  | 28,616(18.3)  | 2,587(17.6)  | 39,031(15.1)  | 42,070(13.6)  | 31,606(16.1)  | 28,398(15.8)  | 27,336(7.7)   |
| 11 Hypertension                                       | 679,287(67.3) | 253,601(77.2) | 181,231(77.1) | 124,646(79.9) | 12,218(83.0) | 192,686(74.4) | 230,409(74.6) | 150,995(77.1) | 136,292(75.9) | 201,777(56.6) |
| 13 Hypothyroidism                                     | 197,447(19.6) | 81,468(24.8)  | 59,450(25.3)  | 40,372(25.9)  | 4,198(28.5)  | 59,893(23.1)  | 76,582(24.8)  | 47,973(24.5)  | 44,249(24.6)  | 50,280(14.1)  |
| 14 Anxiety Disorders                                  | 148,983(14.8) | 70,688(21.5)  | 51,377(21.9)  | 37,563(24.1)  | 4,032(27.4)  | 48,859(18.9)  | 62,418(20.2)  | 41,655(21.3)  | 37,588(20.9)  | 31,709(8.9)   |
| 15 Bipolar Disorder                                   | 17,882(1.8)   | 8,368(2.5)    | 6,104(2.6)    | 4,533(2.9)    | 468(3.2)     | 5,442(2.1)    | 6,658(2.2)    | 5,147(2.6)    | 4,227(2.4)    | 4,242(1.2)    |
| 16 Major Depressive Affective Disorder                | 153,182(15.2) | 71,732(21.8)  | 52,101(22.2)  | 38,055(24.4)  | 4,148(28.2)  | 48,846(18.9)  | 61,872(20.0)  | 43,416(22.2)  | 38,642(21.5)  | 33,660(9.4)   |
| 17 Schizophrenia and other Psychotic Disorders        | 16,764(1.7)   | 8,591(2.6)    | 6,176(2.6)    | 4,934(3.2)    | 548(3.7)     | 4,421(1.7)    | 5,597(1.8)    | 5,101(2.6)    | 3,811(2.1)    | 4,300(1.2)    |
| 18 Epilepsy                                           | 16,155(1.6)   | 7,543(2.3)    | 5,383(2.3)    | 4,269(2.7)    | 415(2.8)     | 4,310(1.7)    | 5,488(1.8)    | 4,510(2.3)    | 3,621(2.0)    | 4,191(1.2)    |
| 19 Fibromyalgia, Chronic Pain and Fatigue             | 166,279(16.5) | 78,877(24.0)  | 57,494(24.5)  | 41,843(26.8)  | 4,410(29.9)  | 56,152(21.7)  | 70,667(22.9)  | 48,422(24.7)  | 43,379(24.2)  | 33,843(9.5)   |
| 20 Viral Hepatitis (General)                          | 11,969(1.2)   | 4,659(1.4)    | 3,188(1.4)    | 2,523(1.6)    | 287(1.9)     | 3,156(1.2)    | 3,732(1.2)    | 2,712(1.4)    | 2,348(1.3)    | 3,735(1.0)    |
| 21 Liver Disease Cirrhosis and other Liver Conditions | 62,675(6.2)   | 31,930(9.7)   | 23,284(9.9)   | 17,386(11.1)  | 1,919(13.0)  | 19,624(7.6)   | 24,544(7.9)   | 17,393(8.9)   | 15,958(8.9)   | 13,350(3.7)   |
| 22 Leukemias and Lymphomas                            | 13,906(1.4)   | 7,228(2.2)    | 4,822(2.1)    | 4,536(2.9)    | 551(3.7)     | 4,385(1.7)    | 5,905(1.9)    | 4,025(2.1)    | 3,969(2.2)    | 2,758(0.8)    |
| 24 Migraine and other Chronic Headache                | 31,628(3.1)   | 14,936(4.5)   | 11,282(4.8)   | 7,520(4.8)    | 873(5.9)     | 10,841(4.2)   | 13,893(4.5)   | 8,763(4.5)    | 8,403(4.7)    | 6,419(1.8)    |
| 25 Mobility Impairments                               | 20,600(2.0)   | 10,182(3.1)   | 7,356(3.1)    | 5,767(3.7)    | 577(3.9)     | 5,372(2.1)    | 6,629(2.1)    | 5,995(3.1)    | 4,610(2.6)    | 5,439(1.5)    |
| 26 Obesity                                            | 185,101(18.3) | 79,130(24.1)  | 56,609(24.1)  | 41,226(26.4)  | 3,997(27.1)  | 58,654(22.6)  | 69,611(22.5)  | 49,984(25.5)  | 43,740(24.4)  | 44,772(12.6)  |
| 27 Peripheral Vascular Disease                        | 90,132(8.9)   | 45,276(13.8)  | 31,866(13.6)  | 25,977(16.7)  | 3,001(20.4)  | 28,747(11.1)  | 36,241(11.7)  | 28,343(14.5)  | 23,977(13.3)  | 18,446(5.2)   |
| 28 Tobacco Use Disorders                              | 101,890(10.1) | 45,304(13.8)  | 28,907(12.3)  | 27,202(17.4)  | 3,042(20.7)  | 27,261(10.5)  | 37,860(12.3)  | 25,002(12.8)  | 22,975(12.8)  | 26,896(7.5)   |
| 29 Pressure Ulcers and Chronic Ulcers                 | 30,345(3.0)   | 17,688(5.4)   | 12,800(5.4)   | 10,603(6.8)   | 1,196(8.1)   | 9,006(3.5)    | 10,926(3.5)   | 13,404(6.8)   | 9,960(5.5)    | 4,992(1.4)    |
| 30 Deafness and Hearing Impairment                    | 59,576(5.9)   | 27,383(8.3)   | 19,976(8.5)   | 14,014(9.0)   | 1,609(10.9)  | 21,213(8.2)   | 25,498(8.3)   | 16,849(8.6)   | 16,787(9.3)   | 11,900(3.3)   |

Note. Data are presented as No. (%) of patients unless otherwise noted.

Abbreviations: FLQ, fluoroquinolone; CIP, ciprofloxacin; LVX, levofloxacin; MXF, moxifloxacin; AMX, Amoxicillin; AMC, Amoxicillin Clavulanate; AZT, Azithromycin; LEX, Cephalexin; IQR, interquartile range.

**Table 2. Hazard Ratios of Tendon Rupture for Each Covariate**

| Variables                                     | Reference                  | HR(95% CI)       |
|-----------------------------------------------|----------------------------|------------------|
| <b>Female</b>                                 | Male                       | 0.70(0.69,0.72)↓ |
| <b>Black</b>                                  |                            | 0.76(0.73,0.78)↓ |
| <b>Hispanic</b>                               | White                      | 0.91(0.87,0.94)↓ |
| <b>Asian</b>                                  |                            | 0.67(0.63,0.71)↓ |
| <b>Other</b>                                  |                            | 1.05(1.01,1.09)↑ |
| <b>Dual Ever</b>                              | Non-Dual Non-LIS           | 0.66(0.64,0.68)↓ |
| <b>Non-Dual Lis</b>                           |                            | 0.66(0.63,0.70)↓ |
| <b>Living In Rural Area</b>                   | No                         | 0.94(0.92,0.95)↓ |
| <b>Medicare Part D Since 2008</b>             |                            | 1.03(1.00,1.07)  |
| <b>Medicare Part D Since 2009</b>             |                            | 1.11(1.07,1.15)↑ |
| <b>Medicare Part D Since 2010</b>             |                            | 1.16(1.12,1.21)↑ |
| <b>Medicare Part D Since 2011</b>             |                            | 1.17(1.13,1.22)↑ |
| <b>Medicare Part D Since 2012</b>             | Medicare Part D Since 2007 | 1.12(1.08,1.16)↑ |
| <b>Medicare Part D Since 2013</b>             |                            | 1.03(1.00,1.07)  |
| <b>Medicare Part D Since 2013</b>             |                            | 1.05(1.01,1.09)↑ |
| <b>Medicare Part D Since 2015</b>             |                            | 0.91(0.87,0.96)↓ |
| <b>Medicare Part D Since 2016</b>             |                            | 0.93(0.19,4.55)  |
| <b>AMI</b>                                    | No                         | 0.74(0.69,0.79)↓ |
| <b>Atrial Fibrillation</b>                    | No                         | 0.94(0.91,0.97)↓ |
| <b>Cataract</b>                               | No                         | 1.23(1.21,1.25)↑ |
| <b>Chronic Kidney Disease</b>                 | No                         | 0.92(0.89,0.94)↓ |
| <b>COPD</b>                                   | No                         | 0.83(0.81,0.86)↓ |
| <b>Heart Failure</b>                          | No                         | 0.79(0.77,0.82)↓ |
| <b>Diabetes</b>                               | No                         | 0.98(0.96,0.99)↓ |
| <b>Glaucoma</b>                               | No                         | 1.10(1.08,1.12)↑ |
| <b>Hip/Pelvic Fracture</b>                    | No                         | 0.68(0.60,0.77)↓ |
| <b>Ischemic Heart Disease</b>                 | No                         | 1.10(1.08,1.12)↑ |
| <b>Depression</b>                             | No                         | 1.17(1.13,1.21)  |
| <b>Alzheimer's Disease or Senile Dementia</b> | No                         | 0.67(0.63,0.71)↓ |
| <b>Osteoporosis</b>                           | No                         | 1.03(1.01,1.06)↑ |
| <b>Rheumatoid Arthritis/Osteoarthritis</b>    | No                         | 2.84(2.80,2.89)↑ |
| <b>Stroke/Transient Ischemic Attack</b>       | No                         | 0.97(0.94,1.01)  |
| <b>Breast Cancer</b>                          | No                         | 0.94(0.91,0.98)↓ |
| <b>Colorectal Cancer</b>                      | No                         | 0.79(0.74,0.85)↓ |

|    |                                                           |    |                  |
|----|-----------------------------------------------------------|----|------------------|
| 1  | <b>Prostate Cancer</b>                                    | No | 1.03(0.99,1.07)  |
| 2  | <b>Lung Cancer</b>                                        | No | 0.39(0.34,0.45)↓ |
| 3  | <b>Endometrial Cancer</b>                                 | No | 0.85(0.77,0.94)↓ |
| 4  | <b>Anemia</b>                                             | No | 1.01(0.99,1.03)  |
| 5  | <b>Asthma</b>                                             | No | 1.27(1.24,1.31)† |
| 6  | <b>Hyperlipidemia</b>                                     | No | 1.34(1.31,1.36)† |
| 7  | <b>Hyperplasia</b>                                        | No | 1.13(1.10,1.16)† |
| 8  | <b>Hypertension</b>                                       | No | 1.09(1.07,1.11)† |
| 9  | <b>Hypothyroidism</b>                                     | No | 1.08(1.06,1.10)† |
| 10 | <b>Anxiety Disorders</b>                                  | No | 0.98(0.96,1.01)  |
| 11 | <b>Bipolar Disorder</b>                                   | No | 1.02(0.95,1.08)  |
| 12 | <b>Major Depressive Affective Disorder</b>                | No | 1.06(1.02,1.10)† |
| 13 | <b>Schizophrenia and Other Psychotic Disorders</b>        | No | 0.67(0.61,0.74)↓ |
| 14 | <b>Epilepsy</b>                                           | No | 0.83(0.77,0.90)↓ |
| 15 | <b>Fibromyalgia, Chronic Pain and Fatigue</b>             | No | 1.39(1.36,1.42)† |
| 16 | <b>Viral Hepatitis (General)</b>                          | No | 1.04(0.96,1.13)  |
| 17 | <b>Liver Disease Cirrhosis And Other Liver Conditions</b> | No | 0.95(0.92,0.99)↓ |
| 18 | <b>Leukemias and Lymphomas</b>                            | No | 0.94(0.88,1.01)  |
| 19 | <b>Migraine and Other Chronic Headache</b>                | No | 1.28(1.23,1.33)† |
| 20 | <b>Mobility Impairments</b>                               | No | 0.70(0.65,0.76)↓ |
| 21 | <b>Obesity</b>                                            | No | 1.04(1.02,1.06)† |
| 22 | <b>Peripheral Vascular Disease</b>                        | No | 1.00(0.97,1.04)  |
| 23 | <b>Tobacco Use Disorders</b>                              | No | 0.82(0.80,0.85)↓ |
| 24 | <b>Pressure Ulcers and Chronic Ulcers</b>                 | No | 0.82(0.77,0.87)↓ |
| 25 | <b>Deafness and Hearing Impairment</b>                    | No | 1.21(1.17,1.25)† |

Hazard ratios and confidence intervals from the primary analysis for Covariates except for the study antibiotics (which are in Table 3)

Abbreviations: HR, hazard ratio, CI, confidence interval; FLQ, fluoroquinolone; CIP, ciprofloxacin; LVX, levofloxacin; MXF, moxifloxacin; AMX, Amoxicillin; AMC, Amoxicillin Clavulanate; AZT, Azithromycin; LEX, Cephalexin.

†= significantly high with P-value < 0.001, †= significantly high with  $0.001 \leq P\text{-value} < 0.05$

↓= significantly low with P-value < 0.001, ↓= significantly high with  $0.001 \leq P\text{-value} < 0.05$

Table 3. Hazard Ratios of Each Antibiotic by Anatomic Sites and Temporal Order of Drug Exposure

|                |                   | Any Tendon Rupture | Achilles Tendon Rupture | Complete Rupture of Rotator Cuff | Other Tendon Ruptures | Death (Competing risk) |
|----------------|-------------------|--------------------|-------------------------|----------------------------------|-----------------------|------------------------|
|                | Temporal Exposure | HR(95% CI)         | HR(95% CI)              | HR(95% CI)                       | HR(95% CI)            | HR(95% CI)             |
| AMX VS. NO AMX | ≤ 30 days         | 0.86(0.80,0.92) ↓  | 0.88(0.59,1.33)         | 0.88(0.82,0.95) ↓                | 0.79(0.67,0.93) ↓     | 0.66(0.61,0.71) ↓      |
|                | 31 – 60 days      | 0.94(0.87,1.01)    | 0.80(0.49,1.31)         | 0.91(0.84,0.99) ↓                | 1.08(0.93,1.27)       | 0.69(0.63,0.75) ↓      |
|                | ≥ 61 days         | 1.00(0.98,1.02)    | 0.99(0.86,1.13)         | 1.01(0.99,1.04)                  | 0.97(0.92,1.01)       | 0.77(0.75,0.78) ↓      |
| AMC VS. NO AMC | ≤ 30 days         | 0.93(0.85,1.02)    | 1.25(0.79,1.97)         | 0.87(0.79,0.97) ↓                | 1.17(0.98,1.41)       | 1.37(1.30,1.45) ↑      |
|                | 31 – 60 days      | 0.95(0.85,1.05)    | 1.37(0.82,2.29)         | 0.95(0.84,1.06)                  | 0.81(0.63,1.04)       | 1.26(1.17,1.35) ↑      |
|                | ≥ 61 days         | 1.07(1.04,1.09) ↑  | 0.95(0.81,1.12)         | 1.07(1.04,1.10) ↑                | 1.02(0.96,1.08)       | 0.86(0.84,0.88) ↓      |
| AZM VS. NO AZM | ≤ 30 days         | 0.99(0.93,1.06)    | 1.15(0.82,1.63)         | 1.00(0.93,1.08)                  | 0.87(0.75,1.01)       | 0.80(0.75,0.84) ↓      |
|                | 31 – 60 days      | 0.90(0.84,0.98) ↓  | 0.99(0.65,1.49)         | 0.91(0.84,0.99) ↓                | 0.95(0.81,1.11)       | 0.77(0.73,0.82) ↓      |
|                | ≥ 61 days         | 1.07(1.05,1.09) ↑  | 1.02(0.91,1.15)         | 1.09(1.07,1.12) ↑                | 0.99(0.95,1.04)       | 0.71(0.70,0.72) ↓      |
| LEX VS. NO LEX | ≤ 30 days         | 1.31(1.22,1.41) ↑  | 1.93(1.35,2.75) ↑       | 1.19(1.09,1.29) ↑                | 1.79(1.56,2.06) ↑     | 1.04(0.98,1.10)        |
|                | 31 – 60 days      | 1.05(0.95,1.15)    | 1.14(0.66,1.96)         | 1.06(0.96,1.18)                  | 1.02(0.82,1.26)       | 1.01(0.94,1.08)        |
|                | ≥ 61 days         | 1.08(1.05,1.11) ↑  | 1.00(0.85,1.16)         | 1.07(1.05,1.10) ↑                | 1.15(1.09,1.21) ↑     | 0.86(0.84,0.88) ↓      |
| LVX VS. NO LVX | ≤ 30 days         | 1.14(1.05,1.25) ↑  | 2.20(1.50,3.24) ↑       | 1.16(1.06,1.28) ↑                | 0.96(0.78,1.19)       | 2.19(2.11,2.28) ↑      |
|                | 31 – 60 days      | 1.09(0.98,1.21)    | 1.91(1.17,3.10) ↑       | 1.09(0.97,1.22)                  | 1.14(0.90,1.43)       | 1.80(1.71,1.89) ↑      |
|                | ≥ 61 days         | 1.02(1.00,1.05)    | 1.22(1.03,1.43) ↑       | 1.03(1.00,1.07) ↑                | 0.97(0.91,1.03)       | 0.99(0.97,1.01)        |
| CIP VS. NO CIP | ≤ 30 days         | 0.96(0.89,1.03)    | 1.06(0.70,1.60)         | 0.96(0.88,1.04)                  | 0.84(0.71,1.00) ↓     | 1.46(1.40,1.53) ↑      |
|                | 31 – 60 days      | 0.92(0.85,1.01)    | 1.02(0.63,1.67)         | 0.91(0.82,1.00) ↓                | 0.95(0.78,1.14)       | 1.31(1.24,1.38) ↑      |
|                | ≥ 61 days         | 0.96(0.94,0.98) ↓  | 1.16(1.02,1.32) ↑       | 0.96(0.94,0.99) ↓                | 0.92(0.88,0.97) ↓     | 0.86(0.84,0.88) ↓      |
| MXF VS. NO MXF | ≤ 30 days         | 0.59(0.37,0.93)    | 0.97(0.15,6.24)         | 0.52(0.30,0.91) ↓                | 0.76(0.33,1.77)       | 2.05(1.78,2.35) ↑      |
|                | 31 – 60 days      | 0.71(0.43,1.15)    | 0.00(0.00,0.00)         | 0.63(0.35,1.13)                  | 0.93(0.39,2.25)       | 1.43(1.18,1.72) ↑      |
|                | ≥ 61 days         | 0.99(0.93,1.06)    | 1.02(0.69,1.51)         | 0.99(0.92,1.06)                  | 1.10(0.95,1.27)       | 0.89(0.86,0.93) ↓      |
| FLQ VS. AMX    | ≤ 30 days         | 1.00(0.84,1.19)    | 1.49(0.69,3.19)         | 0.94(0.77,1.16)                  | 1.08(0.77,1.50)       | 2.86(2.61,3.13) ↑      |
|                | 31 – 60 days      | 0.95(0.79,1.15)    | 0.07(0.04,0.12) ↓       | 0.94(0.75,1.17)                  | 0.92(0.65,1.31)       | 2.18(1.96,2.44) ↑      |
|                | ≥ 61 days         | 0.99(0.96,1.02)    | 1.14(0.94,1.40)         | 0.98(0.95,1.02)                  | 1.03(0.96,1.11)       | 1.19(1.16,1.22) ↑      |
| FLQ VS. AZM    | ≤ 30 days         | 0.87(0.73,1.03)    | 1.14(0.54,2.39)         | 0.83(0.68,1.02)                  | 0.98(0.70,1.37)       | 2.35(2.18,2.53) ↑      |
|                | 31 – 60 days      | 0.99(0.82,1.19)    | 0.06(0.04,0.09) ↓       | 0.93(0.75,1.16)                  | 1.06(0.75,1.49)       | 1.94(1.77,2.13) ↑      |
|                | ≥ 61 days         | 0.93(0.90,0.96) ↓  | 1.10(0.91,1.34)         | 0.91(0.88,0.94) ↓                | 1.00(0.93,1.08)       | 1.29(1.25,1.32) ↑      |
| FLQ VS. LEX    | ≤ 30 days         | 0.66(0.55,0.78) ↓  | 0.68(0.32,1.42)         | 0.70(0.57,0.87) ↓                | 0.47(0.34,0.66) ↓     | 1.80(1.67,1.95) ↑      |
|                | 31 – 60 days      | 0.85(0.70,1.04)    | 0.05(0.03,0.09) ↓       | 0.80(0.64,1.01)                  | 0.99(0.68,1.44)       | 1.48(1.34,1.64) ↑      |
|                | ≥ 61 days         | 0.92(0.89,0.95) ↓  | 1.13(0.92,1.40)         | 0.92(0.89,0.96) ↓                | 0.86(0.80,0.93) ↓     | 1.06(1.03,1.09) ↑      |
| FLQ VS. AMC    | ≤ 30 days         | 0.93(0.77,1.11)    | 1.05(0.48,2.32)         | 0.96(0.77,1.19)                  | 0.72(0.51,1.02)       | 1.37(1.27,1.48) ↑      |

|                     |                  |                  |                  |                 |                  |
|---------------------|------------------|------------------|------------------|-----------------|------------------|
| <b>31 – 60 days</b> | 0.94(0.77,1.15)  | 0.04(0.02,0.07)↓ | 0.90(0.72,1.14)  | 1.24(0.83,1.86) | 1.19(1.08,1.31)↑ |
| <b>≥ 61 days</b>    | 0.93(0.90,0.97)↓ | 1.19(0.95,1.49)  | 0.93(0.89,0.96)↓ | 0.98(0.90,1.06) | 1.06(1.03,1.09)↑ |

Abbreviations: HR, hazard ratio, CI, confidence interval; FLQ, fluoroquinolone; CIP, ciprofloxacin; LVX, levofloxacin; MXF, moxifloxacin; AMX, Amoxicillin; AMC, Amoxicillin Clavulanate; AZT, Azithromycin; LEX, Cephalexin.

↑= significantly high with P-value < 0.001, ↑= significantly high with 0.001 ≤ P-value < 0.05

↓= significantly low with P-value < 0.001, ↓= significantly high with 0.001 ≤ P-value < 0.05

For peer review only

Table 4. Pairwise Comparisons

| Comparison                                                                                                 | Temporal Exposure | Any Tendon Rupture | Achilles Tendon Rupture | Complete Rupture of Rotator Cuff | Other Tendon Rupture | Death (Competing risk) |
|------------------------------------------------------------------------------------------------------------|-------------------|--------------------|-------------------------|----------------------------------|----------------------|------------------------|
|                                                                                                            |                   | HR(95% CI)         | HR(95% CI)              | HR(95% CI)                       | HR(95% CI)           | HR(95% CI)             |
| <b>HRs comparing use of each FQ with use of each non-FQ antibiotics in a ≤30-day window</b>                |                   |                    |                         |                                  |                      |                        |
| CIP VS. LVX                                                                                                | ≤ 30 days         | 0.84(0.75,0.94)↓   | 0.48(0.27,0.86) ↓       | 0.82(0.73,0.94) ↓                | 0.87(0.67,1.15)      | 0.67(0.63,0.71)↓       |
| CIP VS. MXF                                                                                                | ≤ 30 days         | 1.63(1.02,2.61)↑   | 1.08(0.16,7.29)         | 1.84(1.05,3.24)↑                 | 1.10(0.47,2.60)      | 0.72(0.62,0.83)↓       |
| LVX VS. MXF                                                                                                | ≤ 30 days         | 1.95(1.21,3.13)↑   | 2.26(0.34,15.17)        | 2.24(1.27,3.94)↑                 | 1.26(0.53,3.01)      | 1.07(0.93,1.24)        |
| CIP VS. AMX                                                                                                | ≤ 30 days         | 1.11(1.01,1.23)↑   | 1.20(0.66,2.16)         | 1.09(0.97,1.21)                  | 1.06(0.84,1.34)      | 2.23(2.05,2.44)†       |
| CIP VS. AZM                                                                                                | ≤ 30 days         | 0.97(0.87,1.06)    | 0.91(0.53,1.57)         | 0.96(0.86,1.07)                  | 0.96(0.77,1.21)      | 1.84(1.71,1.97)†       |
| CIP VS. LEX                                                                                                | ≤ 30 days         | 0.73(0.66,0.81)↓   | 0.55(0.31,0.95) ↓       | 0.81(0.72,0.91)↓                 | 0.47(0.37,0.59)†     | 1.41(1.31,1.52)†       |
| CIP VS. AMC                                                                                                | ≤ 30 days         | 1.03(0.91,1.16)    | 0.84(0.46,1.56)         | 1.10(0.96,1.25)                  | 0.71(0.56,0.92)↓     | 1.07(1.00,1.15)        |
| LVX VS. AMX                                                                                                | ≤ 30 days         | 1.33(1.19,1.49)†   | 2.50(1.45,4.29)↑        | 1.32(1.16,1.49)†                 | 1.22(0.93,1.59)      | 3.34(3.07,3.64)†       |
| LVX VS. AZM                                                                                                | ≤ 30 days         | 1.15(1.03,1.29)↑   | 1.91(1.13,3.23)↑        | 1.16(1.03,1.31)↑                 | 1.10(0.84,1.44)      | 2.75(2.57,2.95)†       |
| LVX VS. LEX                                                                                                | ≤ 30 days         | 0.87(0.78,0.98) ↓  | 1.14(0.68,1.92)         | 0.98(0.86,1.12)                  | 0.54(0.41,0.69)†     | 2.11(1.97,2.27)†       |
| LVX VS. AMC                                                                                                | ≤ 30 days         | 1.23(1.08,1.40)↑   | 1.76(0.98,3.15)         | 1.33(1.15,1.54)†                 | 0.82(0.62,1.08)      | 1.60(1.49,1.72)†       |
| MXF VS. AMX                                                                                                | ≤ 30 days         | 0.68(0.43,1.09)    | 1.10(0.16,7.41)         | 0.59(0.34,1.03)                  | 0.96(0.41,2.27)      | 3.12(2.67,3.65)†       |
| MXF VS. AZM                                                                                                | ≤ 30 days         | 0.59(0.37,0.94) ↓  | 0.84(0.13,5.65)         | 0.52(0.30,0.91)↓                 | 0.88(0.37,2.07)      | 2.57(2.21,2.98)†       |
| MXF VS. LEX                                                                                                | ≤ 30 days         | 0.45(0.28,0.72) ↓  | 0.50(0.08,3.35)         | 0.44(0.25,0.77)↓                 | 0.43(0.18,1.00)      | 1.97(1.70,2.29)†       |
| MXF VS. AMC                                                                                                | ≤ 30 days         | 0.63(0.39,1.01)    | 0.78(0.11,5.33)         | 0.60(0.34,1.05)                  | 0.65(0.28,1.53)      | 1.50(1.29,1.73)†       |
| <b>HRs comparing use of FQ as a class with use of each non-FQ antibiotics across different time window</b> |                   |                    |                         |                                  |                      |                        |
| FLQ VS. AMX                                                                                                | Overall           | 0.98(0.90,1.07)    | 0.49(0.36,0.68)         | 0.95(0.86,1.06)                  | 1.01(0.86,1.19)      | 1.95(1.86,2.05)†       |
| FLQ VS. AZM                                                                                                | Overall           | 0.93(0.85,1.01)    | 0.42(0.30,0.57)         | 0.89(0.80,0.98)↓                 | 1.01(0.86,1.19)      | 1.80(1.73,1.88)†       |
| FLQ VS. LEX                                                                                                | Overall           | 0.80(0.73,0.88)    | 0.34(0.24,0.47)         | 0.80(0.72,0.89)                  | 0.74(0.62,0.88)      | 1.42(1.35,1.48)†       |
| FLQ VS. AMC                                                                                                | Overall           | 0.93(0.85,1.02)    | 0.37(0.26,0.52)         | 0.93(0.83,1.03)                  | 0.96(0.80,1.15)      | 1.20(1.15,1.25)†       |

Abbreviations: HR, hazard ratio, CI, confidence interval; FLQ, fluoroquinolone; CIP, ciprofloxacin; LVX, levofloxacin; MXF, moxifloxacin; AMX, Amoxicillin; AMC, Amoxicillin Clavulanate; AZT, Azithromycin; LEX, Cephalexin.

†= significantly high with P-value < 0.001, †= significantly high with 0.001 ≤ P-value < 0.05

‡= significantly low with P-value < 0.001, ‡= significantly high with 0.001 ≤ P-value < 0.05

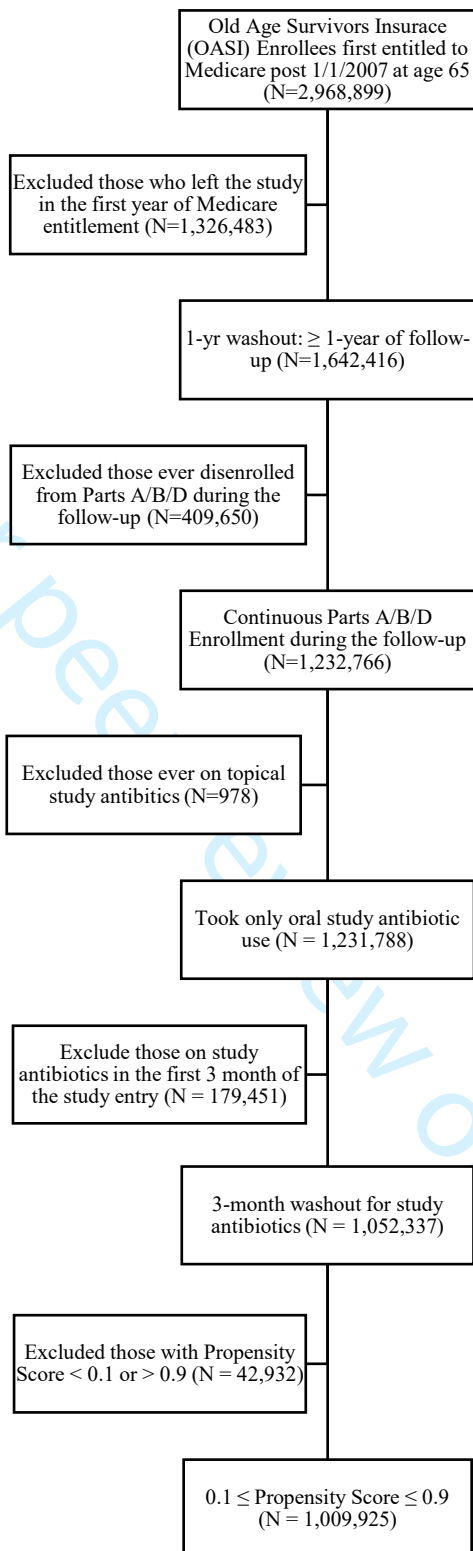



Supplementary Figure. Secular Trend of Study Antibiotic Use



X-axis: Calendar year.

Y-axis: % of patients on each drug class.

STROBE Statement—Checklist of items that should be included in reports of *case-control studies*

|                              | Item No | Recommendation                                                                                                                                                                                    | Page No |
|------------------------------|---------|---------------------------------------------------------------------------------------------------------------------------------------------------------------------------------------------------|---------|
| <b>Title and abstract</b>    | 1       | (a) Indicate the study's design with a commonly used term in the title or the abstract                                                                                                            | 1       |
|                              |         | (b) Provide in the abstract an informative and balanced summary of what was done and what was found                                                                                               | 2       |
| <b>Introduction</b>          |         |                                                                                                                                                                                                   |         |
| Background/rationale         | 2       | Explain the scientific background and rationale for the investigation being reported                                                                                                              | 5       |
| Objectives                   | 3       | State specific objectives, including any prespecified hypotheses                                                                                                                                  | 5       |
| <b>Methods</b>               |         |                                                                                                                                                                                                   |         |
| Study design                 | 4       | Present key elements of study design early in the paper                                                                                                                                           | 6       |
| Setting                      | 5       | Describe the setting, locations, and relevant dates, including periods of recruitment, exposure, follow-up, and data collection                                                                   | 6       |
| Participants                 | 6       | (a) Give the eligibility criteria, and the sources and methods of case ascertainment and control selection. Give the rationale for the choice of cases and controls                               | 6       |
|                              |         | (b) For matched studies, give matching criteria and the number of controls per case                                                                                                               |         |
| Variables                    | 7       | Clearly define all outcomes, exposures, predictors, potential confounders, and effect modifiers. Give diagnostic criteria, if applicable                                                          | 7       |
| Data sources/<br>measurement | 8*      | For each variable of interest, give sources of data and details of methods of assessment (measurement). Describe comparability of assessment methods if there is more than one group              | 7       |
| Bias                         | 9       | Describe any efforts to address potential sources of bias                                                                                                                                         | 8-9     |
| Study size                   | 10      | Explain how the study size was arrived at                                                                                                                                                         | 6       |
| Quantitative variables       | 11      | Explain how quantitative variables were handled in the analyses. If applicable, describe which groupings were chosen and why                                                                      | 8       |
| Statistical methods          | 12      | (a) Describe all statistical methods, including those used to control for confounding                                                                                                             | 7-9     |
|                              |         | (b) Describe any methods used to examine subgroups and interactions                                                                                                                               | n/a     |
|                              |         | (c) Explain how missing data were addressed                                                                                                                                                       | n/a     |
|                              |         | (d) If applicable, explain how matching of cases and controls was addressed                                                                                                                       | n/a     |
|                              |         | (e) Describe any sensitivity analyses                                                                                                                                                             | n/a     |
| <b>Results</b>               |         |                                                                                                                                                                                                   |         |
| Participants                 | 13*     | (a) Report numbers of individuals at each stage of study—eg numbers potentially eligible, examined for eligibility, confirmed eligible, included in the study, completing follow-up, and analysed | 9       |
|                              |         | (b) Give reasons for non-participation at each stage                                                                                                                                              | 9       |
|                              |         | (c) Consider use of a flow diagram                                                                                                                                                                | 9       |
| Descriptive data             | 14*     | (a) Give characteristics of study participants (eg demographic, clinical, social) and information on exposures and potential confounders                                                          | 9-10    |
|                              |         | (b) Indicate number of participants with missing data for each variable of interest                                                                                                               | n/a     |
| Outcome data                 | 15*     | Report numbers in each exposure category, or summary measures of exposure                                                                                                                         | 10      |



# BMJ Open

## The association between Tendon Ruptures and Use of Fluoroquinolone, and other oral antibiotics: A 10-year Retrospective Study of 1 million U.S. senior Medicare beneficiaries

|                                 |                                                                                                                                                                                 |
|---------------------------------|---------------------------------------------------------------------------------------------------------------------------------------------------------------------------------|
| Journal:                        | <i>BMJ Open</i>                                                                                                                                                                 |
| Manuscript ID                   | bmjopen-2019-034844.R4                                                                                                                                                          |
| Article Type:                   | Original research                                                                                                                                                               |
| Date Submitted by the Author:   | 30-Oct-2020                                                                                                                                                                     |
| Complete List of Authors:       | Baik, Seo; National Library of Medicine, Lau, Jason; National Library of Medicine Huser, Vojtech ; National Library of Medicine McDonald, Clement; National Library of Medicine |
| <b>Primary Subject Heading</b>: | Epidemiology                                                                                                                                                                    |
| Secondary Subject Heading:      | General practice / Family practice, Pharmacology and therapeutics                                                                                                               |
| Keywords:                       | CLINICAL PHARMACOLOGY, EPIDEMIOLOGY, ORAL MEDICINE, Musculoskeletal disorders < ORTHOPAEDIC & TRAUMA SURGERY, ACCIDENT & EMERGENCY MEDICINE                                     |
|                                 |                                                                                                                                                                                 |

SCHOLARONE™  
Manuscripts



I, the Submitting Author has the right to grant and does grant on behalf of all authors of the Work (as defined in the below author licence), an exclusive licence and/or a non-exclusive licence for contributions from authors who are: i) UK Crown employees; ii) where BMJ has agreed a CC-BY licence shall apply, and/or iii) in accordance with the terms applicable for US Federal Government officers or employees acting as part of their official duties; on a worldwide, perpetual, irrevocable, royalty-free basis to BMJ Publishing Group Ltd ("BMJ") its licensees and where the relevant Journal is co-owned by BMJ to the co-owners of the Journal, to publish the Work in this journal and any other BMJ products and to exploit all rights, as set out in our [licence](#).

The Submitting Author accepts and understands that any supply made under these terms is made by BMJ to the Submitting Author unless you are acting as an employee on behalf of your employer or a postgraduate student of an affiliated institution which is paying any applicable article publishing charge ("APC") for Open Access articles. Where the Submitting Author wishes to make the Work available on an Open Access basis (and intends to pay the relevant APC), the terms of reuse of such Open Access shall be governed by a Creative Commons licence – details of these licences and which [Creative Commons](#) licence will apply to this Work are set out in our licence referred to above.

Other than as permitted in any relevant BMJ Author's Self Archiving Policies, I confirm this Work has not been accepted for publication elsewhere, is not being considered for publication elsewhere and does not duplicate material already published. I confirm all authors consent to publication of this Work and authorise the granting of this licence.

1  
2  
3 **The association between Tendon Ruptures and Use of Fluoroquinolone, and other oral**  
4 **antibiotics: A 10-year Retrospective Study of 1 million U.S. senior Medicare beneficiaries**  
5  
6  
7  
8  
9

10 **Seo Baik<sup>1</sup>, PhD, Jason J. Lau<sup>2</sup>, MD, Vojtech Huser<sup>1</sup>, MD, PhD, Clement J. McDonald<sup>1</sup>, MD**  
11  
12  
13

14 Author Affiliations  
15

- 16  
17 1. Lister Hill National Center for Biomedical Communications, National Library of  
18 Medicine, U.S. National Institutes of Health, Bethesda, Maryland, USA (Drs. Baik,  
19 Huser and McDonald)  
20  
21  
22 2. Department of Pediatric, UC Davis Health, Sacramento, California (Dr. Lau)  
23  
24  
25  
26  
27

28 Address reprint request to Dr. McDonald (corresponding author) at Lister Hill National Center  
29 for Biomedical Communications, National Library of Medicine, U.S. National Institutes of  
30 Health, 8600 Rockville Pike, Building 38A, Room 07N710, Bethesda, Maryland 20894, USA  
31  
32

33 Telephone: +1 (301) 496-4441  
34

35 E-mail: ClemMcDonald@mail.nih.gov  
36  
37  
38  
39  
40  
41  
42  
43  
44

45 **4000 Words (4000 Max)**  
46  
47  
48  
49  
50  
51  
52  
53  
54  
55  
56  
57  
58  
59  
60

**Abstract (298 words; 300 Max)**

**Objectives:** To assess the association of fluoroquinolone use with tendon ruptures compared to no fluoroquinolone and that of the four most commonly prescribed non-fluoroquinolone antibiotics in the US.

**Design:** Retrospective observational study.

**Setting:** U.S. seniors enrolled in the federal old-age, survivor's insurance program.

**Participants:** 1,009,925 Medicare fee-for-service beneficiaries and their inpatient, outpatient, prescription drug records were used.

**Interventions:** Seven oral antibiotics, fluoroquinolones (ciprofloxacin, levofloxacin, moxifloxacin) and amoxicillin, amoxicillin-clavulanate, azithromycin and cephalexin.

**Primary and Secondary Outcome measures:** All tendon ruptures combined, and three types of tendon ruptures by anatomic site, Achilles tendon rupture, rupture of rotator cuff and other tendon ruptures occurred in 2007-2016.

**Results:** Of three fluoroquinolones, only levofloxacin exhibited a significant increased risk of tendon ruptures - 16% (HR=1.16; 95% CI 1.06-1.28), and 120% (HR=2.20; 95% CI 1.50-3.24) for rotator cuff and Achilles tendon rupture respectively in the  $\leq 30$ -day window. Ciprofloxacin (HR=0.96; 95% CI 0.89-1.03) and moxifloxacin (HR=0.59; 95% CI 0.37-0.93) exhibited no increased risk of tendon ruptures combined.

Among the non-fluoroquinolone antibiotics, cephalexin exhibited *increased* risk of combined tendon ruptures (HR=1.31; 95% CI 1.22-1.41) and modest to large risks across all anatomic rupture sites (HRs 1.19-1.93) at  $\leq 30$ -day window. Notably, the risk of

1  
2  
3 levofloxacin never exceeded the risk of the non-fluoroquinolone, cephalexin in any  
4  
5 comparison.  
6  
7

8  
9 **Conclusions:** In our study, fluoroquinolones as a class were not associated with the  
10 increased risk of tendon ruptures. Neither ciprofloxacin nor moxifloxacin exhibited any  
11 risk for tendon ruptures. Levofloxacin did exhibit significant increased risk. Cephalexin  
12 with no reported effect on metalloprotease activity had an equal or greater risk than  
13 levofloxacin; so we question whether metalloprotease activity has any relevance to  
14 observed associations with tendon rupture. Confounding by indication bias may be more  
15 relevant and should be given more consideration as explanation for significant  
16 associations in observational studies of tendon rupture.  
17  
18  
19  
20  
21  
22  
23  
24  
25  
26  
27  
28  
29  
30  
31  
32  
33  
34  
35  
36  
37  
38  
39  
40  
41  
42  
43  
44  
45  
46  
47  
48  
49  
50  
51  
52  
53  
54  
55  
56  
57  
58  
59  
60



### Strengths and limitations of this study

- We conducted a large (more than 1 million US senior subjects) retrospective study of outpatient prescription drug records to assess the association between the use of fluoroquinolones and the occurrence of tendon ruptures compared to the most commonly used non-fluoroquinolone oral antibiotics.
- Our study included all oral fluoroquinolones (ciprofloxacin, levofloxacin, moxifloxacin) prescribed in the US and the four most commonly prescribed non-fluoroquinolone antibiotics: amoxicillin, amoxicillin-clavulanate, azithromycin and cephalexin as controls.
- In addition to reporting the risk of any tendon rupture, we also reported the risk of three types of tendon ruptures by anatomic site 1) Achilles tendon rupture, 2) rupture of rotator cuff and 3) tendon ruptures on other anatomic sites as separate outcomes.
- This study is possibly only applicable to U.S. senior, aged 65 or more, Medicare fee-for-service beneficiaries.
- We had no options to verify claims diagnoses via chart review.

## Introduction

Fluoroquinolones (FQ) are among the most widely prescribed antibiotics in the outpatient setting[1,2] due to their broad spectrum treatment of bacteria found in respiratory, urinary, joint, and skin infections. Several observational studies have reported the association between the use of FQs and tendinitis and tendon rupture (TR), especially of the Achilles tendon[3–12] and the U.S. Food and Drug Administration (FDA) issued black box warnings to FQ antibiotics beginning in 2008.[13] The warning was updated in 2016 to recommend using alternative antibiotics when possible.[14,15] The fact that FQs upregulate the production of metalloproteinase enzymes with collagenase activity that could weaken tendons is taken as a mechanism to explain this reported risk.[16–18]

Studies that reported association between FQ use and TR used one or more other antibiotics as controls. One study compared the FQ rupture rates with patients using azithromycin, the most frequently used oral antibiotic in the US. Only two focused principally on TR risk among the elderly. None compared TR rates of *FQs* with those of cephalexin -- the 3rd most commonly prescribed oral antibiotic in the US.

The Virtual Research Data Center (VRDC) of Center for Medicare and Medicaid Services (CMS)[19] carries more than 10 years of Medicare claims, which include information about the usage of prescription drugs and encounter diagnoses (including tendon ruptures). It also carries information about 42 major chronic conditions, demographic characteristic and vital status. We conducted a large observational study using the VRDC to assess the association of FQ antibiotics with TR compared to that of

1  
2  
3 the four most commonly prescribed non-FQ antibiotics in the US. Here we report the  
4  
5 results of that analysis.  
6  
7  
8  
9

## 10 **Methods**

### 11 *Patient and public involvement*

12  
13  
14 Neither patients nor the public were not involved in the design of the study.  
15  
16  
17

### 18 *Study population*

19  
20 We derived our study population from a 20% random sample of Medicare prescription  
21  
22 drug coverage (Part D) enrollees who first enrolled in the Medicare under old age and  
23  
24 survivors insurance within a month of age 65 (779-781 month-old) and on or after  
25  
26 1/1/2007 - the first full year of Part D prescriptions availability. We included claim data  
27  
28 through 12/31/2016, the end of VRDC claim data available to us. All of the VRDC data  
29  
30 is de-identified and researchers must perform all of their analysis within the VRDC  
31  
32 computer systems, and can only pull statistical results from it.[19] This study was  
33  
34 declared not human subject research by the Office of Human Research Protection at the  
35  
36 National Institutes of Health and by the CMS's Privacy Board.  
37  
38  
39  
40  
41  
42  
43

44 We required subjects to be continuously enrolled in hospital insurance (Part A) and  
45  
46 medical insurance (Part B) to assure we had full outpatient and inpatient claims data,  
47  
48 which are not available for nearly 20% of subjects with Part D only.[20] To obtain a  
49  
50 cohort of new TR patients, we excluded individuals with TRs recorded in the first year of  
51  
52 their Medicare entitlement.[21] In order to assure sufficient follow-up, we excluded  
53  
54  
55  
56  
57  
58  
59  
60

1  
2  
3 individuals with less than 1-year follow-up. Moreover, to obtain incident (or new) drug  
4 user cohort, we excluded individuals who were prescribed any study antibiotics during  
5 their first 3-month after Part D enrollment, while ignoring the data during the same time  
6 window for individuals not taking study antibiotics. By doing so, we minimize survivor  
7 bias from a prevalent users (Figure 1 Consort Diagram).  
8  
9  
10  
11  
12  
13

### 14 15 16 17 Primary Outcome

18 We identified patients with TR based upon International Classification of Diseases  
19 (ICD)-9-CM codes of 726.13, 727.60-727.69, and ICD-10-CM codes of M66.2, M66.3,  
20 M66.8, M66.9, and M75.1. We combined all TRs and reported them as one outcome, and  
21 report three types of TRs by anatomic site 1) Achilles tendon rupture, 2) rupture of  
22 rotator cuff and 3) TRs on other anatomic sites as separate outcomes. We focused on  
23 Achilles TR because it was the sole focus of many prior studies and on rotator cuff TR  
24 because it is the predominant TR of the elderly. We lumped the remaining as “other  
25 TRs”.  
26  
27  
28  
29  
30  
31  
32  
33  
34  
35  
36  
37  
38  
39

### 40 Study antibiotics

41 We included a total of seven study antibiotics prescribed in the US including all three  
42 oral FQs (moxifloxacin (MXF), ciprofloxacin (CIP), levofloxacin (LVX), the active  
43 stereoisomer of ofloxacin) and the four most frequently prescribed non-FQ oral  
44 antibiotics (amoxicillin (AMX), amoxicillin clavulanate (AMC), azithromycin (AZT) and  
45 cephalexin (LEX)) as a control. Ciprofloxacin and the four non-FQ, study antibiotics  
46 were the five most frequently used U.S. oral antibiotics in 2011.  
47  
48  
49  
50  
51  
52  
53  
54  
55  
56  
57  
58  
59  
60

### Statistical Analysis

We analyzed each of the four TR outcomes in separate Fine-Gray competing risk regression analyses with death as the competing risk.[22,23] Individuals became eligible for “the study” at their Medicare enrollment but prescription data did not become available until their Part D enrollment. We followed them from their entry in Part D (while accounting for left truncation[24]) until their first diagnosis of TR, death, switch to a capitated plan, disenrollment from Medicare or 12/31/2016 – whichever came first. In each regression analysis, we included the seven antibiotics whose effects on TR were our primary interest. We adjusted hazard ratio (HR) of each study antibiotic for concurrent use of the other study antibiotics. We also adjusted for calendar year of individual’s Part D entry, to account for secular trends, and their socio-demographic characteristics of gender, race, rural residency (Yes/No) and income status. We inferred individual’s income level from the monthly indicators of dual-eligibility and Low Income Subsidy (LIS) status, which separate subjects into three groups; 1) dual whose income is below 135% Federal Poverty Line (FPL); 2) non-dual LIS whose income is between 135 and 150% FPL; and 3) non-dual no LIS whose income is above 150% FPL, respectively. We used this variable in the analysis as a surrogate for economic status.[25] We also included the 42 chronic conditions within the Medicare Master Beneficiary Summary File [26] that had >1% prevalence as measures of overall health. We assumed that patients were on a given study drug from the prescription dispensing date to the end of days of supply. We did not distinguish between different brands of a study drugs. Following the approach of prior studies,[3–5] we separated subjects by temporal exposure within each study drug,

1  
2  
3 including groups for never exposed, exposed within 30 days, 31-60 days, and >60 days of  
4 the index (or TR event) time. Thus, by this approach we could detect the presumed short  
5 term action of the FQ's on tendons and avoid the risk of non-differential misclassification  
6 that can occur with too simple (yes/no) drug exposure measures.[27] In order to minimize  
7 the immortal time bias, we treated all drug usage measures and all socio-demographic  
8 characteristics, except gender, race and rural residency, as time-varying  
9 covariates.[28,29] In order to mitigate selection bias toward use of any study antibiotics,  
10 we employed a propensity score (PS) approach.[30,31] We first derived a PS of taking  
11 any of study antibiotics as a function of individual's characteristics at the time of the first  
12 antibiotic use after Part D entry from a multiple logistic regression. We used the median  
13 days to the first study antibiotic use in patients taking study antibiotics as the cutoff time  
14 for individuals not taking study antibiotics. We performed our analyses with an inverse  
15 propensity score weight (IPSW) excluding individuals with the PS below 0.1 and above  
16 0.9, to mitigate poorer performance in the presence of a strong treatment-selection  
17 process.[32] In post-hoc analyses, we also compared the risk of TR of each study  
18 antibiotics to that of every other study antibiotic on a pairwise basis.

## 41 42 **Results**

### 43 Study population and Secular trend

44 From our 20% sample of Part D enrollees, 1,009,925 individuals satisfied all our  
45 selection criteria including the washout of individuals with any antibiotic use in their first  
46 3-month of Part D enrollment (Figure 1 Consort Diagram). Follow-up began with an  
47 individual's enrollment in Part D program (median (IQR) 0 (0-122) days from the  
48  
49  
50  
51  
52  
53  
54  
55  
56  
57  
58  
59  
60

1  
2  
3 Medicare entitlement). We followed them for a median of 3.6 years (total 4,030,897  
4 patient-years) until their first diagnosis of TR (3.5%), death (4.6%), switch to a capitated  
5 plan (12.6%), disenrollment from Medicare (<1%) or study end on 12/31/2016 (79.3%),  
6 whichever came first. Patients had their first post enrollment claim with a diagnosis of  
7 TR at a median age of 68.5 (IQR 67.2-70.4). The proportions of non-Hispanic White,  
8 female and rural residents were 80.7%, 57.0%, and 22.6% respectively. About a fifth of  
9 individuals received federal/state subsidies, i.e. Medicaid coverage on top of Medicare  
10 (dual 16.1%) or assistance in paying their Part D premium and coinsurance/copayment  
11 (non-dual LIS 2.7%). Among the 42 Medicare chronic conditions, hypertension (67.3%),  
12 hyperlipidemia (68.4%), cataract (46.4%), rheumatoid arthritis/osteoarthritis (36.6%),  
13 anemia (30.4%), ischemic heart disease (26.2%), and chronic kidney disease (17.9%)  
14 were the seven most prevalent (Table 1).  
15  
16  
17  
18  
19  
20  
21  
22  
23  
24  
25  
26  
27  
28  
29  
30  
31  
32

33 Of the 328,654 (33.0%) patients who ever took an FQ, 71.5%, 47.5% and 4.5% had taken  
34 CIP, LVX and MXF respectively. Of 576,885 (57.1%) of patients who ever took a non-  
35 FQ antibiotic, the figures were 53.6%, 44.9%, 33.9% and 31.1% for AZM, AMX, LEX,  
36 and AMC, respectively. Patients who took one or more study antibiotics took a median  
37 (IQR) of 3.0 (1.0-6.0) study antibiotic prescriptions and took a median (IQR) 2.0 (1.0-  
38 3.0) different study antibiotics during the observation period. About 2.5% patients who  
39 took one or more study antibiotics took one or more such antibiotics at the same time.  
40  
41  
42  
43  
44  
45  
46  
47  
48  
49 Secular trends in study antibiotics usage existed (Supplementary Figure 1). MXF usage  
50 declined precipitously from 5.0% in 2007 to almost zero in 2016 – overweighting the  
51 MXF statistics for early entrants into Medicare and yielding a longer mean follow-up  
52  
53  
54  
55  
56  
57  
58  
59  
60

1  
2  
3 time. CIP use hit a peak, and LVX, a nadir, in 2011. The use of AMX, AMC and LEX  
4 trended slowly upward (Supplementary Figure 1). The mode (median) of supply  
5 durations for each antibiotics were short--10 (7) for AMX, 10 (10) for AMC, 5 (5) for  
6 AZM, 10 (7) for LEX, 7 (7) for CIP, 10 (7) for LVX, 10 (11) for MXF. About 35% of  
7 individuals were never exposed to any of the study antibiotics during the study period.  
8  
9

10  
11  
12  
13  
14  
15  
16  
17 Unadjusted figures for TR prevalence across each of the seven study antibiotic users and  
18 the no study antibiotic users ranged from a high of 5.2% for MXF to a low of 2.9% for no  
19 antibiotic (Table 1). Except for MXF, the *unadjusted* prevalence of TRs associated with  
20 each non-FQ antibiotic was *greater than* or equal to that of each FQ antibiotic. The TR  
21 rates per 1000 patient-years followed the same pattern, with the non-FQ antibiotics  
22 topping the rates of all FQs except MXF (with the highest rate), possibly due to  
23 overweighting of MXF usage in the early years of the study. Patients who ever took an  
24 FQ had the highest unadjusted rate of death per 1000 person-years. LVX's death rate was  
25 nearly twice the rate of each non-FQ antibiotics. The size of the associations with  
26 conditions like diabetes, chronic renal failure and heart failure paralleled the magnitude  
27 of the death rates and was generally higher with FQs than non-FQ antibiotics (Table 1).  
28  
29  
30  
31  
32  
33  
34  
35  
36  
37  
38  
39  
40  
41  
42  
43

#### 44 Primary Analysis

45  
46  
47 Table 2 presents HRs for all non-antibiotic covariates in our Fine-Gray competing risk  
48 regression with IPSW. For simplicity sake, in Table 2, we report the HRs of all anatomic  
49 types of tendon ruptures taken together. Being a female (vs. male), African-American,  
50 Hispanic, and Asian (vs. white), being dual or non-dual LIS (vs. non-dual no LIS) and  
51  
52  
53  
54  
55  
56  
57  
58  
59  
60



1  
2  
3 living in a rural area were all associated with a *reduced* risk of tendon rupture. These risk  
4 reductions were 24% or more for all but Hispanics and rural residency covariates, and the  
5 reductions were similar across all anatomic sites. In general, life-threatening chronic  
6 conditions, such as AMI, COPD, heart failure and colorectal/lung/endometrial cancers  
7 were associated with a lower risk of TR in a range of 15-60% below control possibly due  
8 to constrained physical activity and/or shortened life span. Notably, diabetes and chronic  
9 renal disease, previously reported as risk factors for TR,[33,34] exhibited no increased  
10 TR risk. Mobility impairments had reduced risk of TR similar to that of the severe life-  
11 threatening conditions, likely due to reduced activity. Most conditions with low life  
12 threats such as cataract, glaucoma, depression, asthma, hyperlipidemia, hypertension,  
13 prostatic hyperplasia, migraine/other chronic headache, and deafness/hearing impairment  
14 exhibited risks of 8 to 34% *above* controls probably for reasons related to longer life  
15 spans and less inhibited activity. Ischemic heart did not fit the mold of sicker equals  
16 lower TR risk. Patients with rheumatoid arthritis/osteoarthritis were a special case and  
17 had TR risk of 184% *above* control possibly due to joint and associated tendon  
18 inflammation with these disorders. Fibromyalgia/chronic pain and fatigue also exhibited  
19 a 39% increased risk of TR possibly also due to an inflammatory component.

20  
21  
22  
23  
24  
25  
26  
27  
28  
29  
30  
31  
32  
33  
34  
35  
36  
37  
38  
39  
40  
41  
42  
43 The Achilles tendon carries the full force of the extra weight carried by obese patients  
44 and obesity was associated with a significant (13%) increase in Achilles TR ruptures  
45 while its effect on other TR classes was significant but miniscule (2-3%) (Data not  
46 shown).

### 47 48 49 50 51 52 53 ***Effect of antibiotics***

1  
2  
3 We report HRs from our primary analysis in tables separate from the non-antibiotic  
4 covariates. Table 3 shows the risk associated with each study antibiotic broken down by  
5 time lag between the antibiotic use and the TRs (separate rows), and by all TRs together  
6 and separately by anatomic sites (in columns). We also report HRs of death (competing  
7 risk). We used multiplicity corrected p-values to simultaneously test the difference of  
8 pairs of antibiotics to minimize the chance of finding statistically significant difference  
9 by random chance.[35] Of the total 34,880 patients with any TR occurrence, complete  
10 rupture of rotator cuff represented the major share (80.5%), followed by other TRs  
11 (16.9%) and Achilles TR (2.6%). In the survival analysis, we followed patients until the  
12 first occurrence of TR; so, these figures count only the first TR occurrence independent  
13 of anatomic site.  
14  
15  
16  
17  
18  
19  
20  
21  
22  
23  
24  
25  
26  
27  
28

29 Of the non-FQ antibiotics, AMX exhibited a reduced risk of TR compared to no AMX in  
30 every tendon class and time window, similar to its low risk in previous studies. It  
31 exhibited a significantly lower risk in the  $\leq 30$ -day window except for the Achilles  
32 tendon. AZM and AMC exhibited a similar benign risk in all time windows except for  
33 TR of rotator cuff in  $> 60$ -day window. LEX was the surprise non-FQ antibiotic. It  
34 exhibited modest to large *increased* TR risk at  $\leq 30$ -day window across all sites ranging  
35 from a low of 19% increase for complete rupture of rotator cuff to a high 93% increase  
36 for Achilles TR. Its risk was also significantly higher at  $\leq 30$ -day window for all TRs  
37 taken together.  
38  
39  
40  
41  
42  
43  
44  
45  
46  
47  
48  
49  
50

51 Of the FQs, CIP and MXF, the most and least frequently prescribed FQ, exhibited little to  
52 no increased risk of TR within each anatomic site and each time frame. LVX is the only  
53 FQ to exhibit a significant *increase* in TR risk - of 16%, and 120% for rupture of rotator  
54  
55  
56  
57  
58  
59  
60

1  
2  
3 cuff and Achilles TR respectively in the  $\leq 30$ -day window. Notably, the risk of LVX  
4  
5 never exceeded the risk of the non-FQ, LEX in any comparison.  
6  
7

8  
9 In a post-hoc analysis (Table 4), we compared the TR risk of each antibiotic with every  
10  
11 other antibiotic (pairwise comparisons of FQ vs. FQ and FQ vs. non-FQ), for  $\leq 30$ -day  
12  
13 window and FQs as a class vs. each non-FQ after combining the data from the three time  
14  
15 windows. These results paralleled the above-mentioned risk for each study antibiotic in  
16  
17 Table 3. Again, TR risk for LVX was greater than that of CIP, MXF, AMC, AMX, and  
18  
19 AZM in a  $\leq 30$ -day window. However, LVX risk was comparable to that of LEX for  
20  
21 Achilles TR, and rupture of rotator cuff and significantly lower than LEX for the other  
22  
23 TR classes. When comparing the risk of FQs as a class against that of non-FQ antibiotics,  
24  
25 most of the non-FQ antibiotics had significantly greater risk than the FQ class as a whole  
26  
27 across all TR sites (See last 4 rows of Table 4).  
28  
29  
30  
31

32  
33 In another analysis evaluating risk of death for each antibiotics, each FQ antibiotic  
34  
35 exhibited a significant increase in death risk of – 46% (for CIP), 105% (for MXF) and  
36  
37 119% (for LVX) in a  $\leq 30$ -day window. Among non-FQ antibiotics, only AMC exhibited  
38  
39 37% increased risk of death in a  $\leq 30$ -day window. Overall, risk of death for FQs as a  
40  
41 class far outweighed that of each non-FQ antibiotics.  
42  
43  
44  
45  
46  
47

## 48 **Discussion**

49  
50 Our results conflict with the common assertion that the Achilles tendon rupture is the  
51  
52 most common tendon rupture (up to 90% in one report[36]). In our elderly cohort,  
53  
54 Achilles TRs were a tiny, 2.6%, of all TRs. Some of this difference may be explained by  
55  
56  
57

1  
2  
3 the differences in demographics. Reports of high prevalence of Achilles TR came from  
4 studies of young military populations.[37,38] In contrast, our data came from an elderly  
5 Medicare population. Some of the difference could also be due to less ability to diagnose  
6 non-Achilles tendon ruptures until MRI joint imaging became widely available, because  
7 such TRs are less amenable to diagnosis by physical exam.  
8  
9  
10  
11  
12  
13  
14  
15

16  
17 Many authorities describe the relationship between FQs and TRs as a class “effect”.

18  
19 However, FQs as a class had no significant risk of TR compared with each of the four  
20 non-FQ antibiotics in any time window. CIP (n=234,994 subjects) is the oral FQ with the  
21 greatest use and with a greater effect on metalloproteases than other FQs.[39–41]  
22  
23

24  
25 However, neither MXF (n= 14,728 subjects) nor CIP had any TR risk at any anatomic  
26 site in any time window. CIP’s lack of risk is consistent with two studies[5,9] in which  
27 CIP exhibited zero risk or small risks compared to ofloxacin, a racemic mixture whose  
28 active ingredient is the levo-isomer, LVX. We do see a strong association between LVX  
29 and TRs whether we used no LVX or three of the non-FQ antibiotics as controls.  
30  
31  
32  
33  
34  
35  
36

37  
38 However, when we used LEX, a cephalosporin, as the control for LVX’s effect on TRs,  
39 we saw no increased risk.  
40  
41  
42  
43

44  
45 As noted in the introduction, the FDA has added a black box warning about tendon  
46 ruptures to the labels of fluoroquinolones. A 2015 paper[42] described the evidence for  
47 this decision based on the FDA’s Adverse Event Reporting System (FAERS) database  
48 and an empirical Bayes geometric mean (EBGM) score, which is based on the relative  
49 frequency of spontaneous report about a given adverse event in one drug versus the  
50  
51  
52  
53  
54  
55  
56  
57  
58  
59  
60

1  
2  
3 reporting of that adverse event across all drugs. This EBGM score based upon FAERS  
4 database has been useful but FAERS database is still limited by a lack of true  
5 denominator for population at risk, underreporting due to a voluntary reporting scheme  
6 and bias due to limited adjustment variables.[43] Our study was based on a well-defined  
7 Medicare population with 80 variable adjustments. The fact that levofloxacin's EBGM  
8 score was six times that of ofloxacin[42] though both drugs have the same active  
9 ingredient (the levo-isomer of ofloxacin) and the same dose of that ingredient, raises  
10 questions about what factors influenced that score.  
11  
12  
13  
14  
15  
16  
17  
18  
19  
20  
21  
22  
23

24 One previous study described the effect of FQs on TR risk as small and unimportant.[10]  
25 Two studies reported no effect of FQs on TR risk.[9,11] At least 7 observational studies  
26 reported that the use of FQs increased risks of TR.[3–8,12] However, in all but one study,  
27 the number of TRs among patients taking an FQs was small (between 5 and 111). In  
28 comparison, our study included 12,517 (3.8%) such patients. One previous study did  
29 report a large number of TR events, 23,000 (3.5%) patients while on FQs and, like our  
30 study, it focused exclusively on elderly patients.[3] However, it did not compare the  
31 population of FQ users against non-users but FQ usage periods against non-usage periods  
32 in the same set of patients, which were likely periods without visits and thus could not  
33 account for the effect of increased clinical attention provided at visits requiring a strong  
34 systemic antibiotic. Furthermore, they assessed the association between AMX and TRs in  
35 separate analysis and used the risk of TRs in that analysis as the comparator for the risk  
36 observed in the FQ analysis. Finally, their analysis did not include death as a competing  
37  
38  
39  
40  
41  
42  
43  
44  
45  
46  
47  
48  
49  
50  
51  
52  
53  
54  
55  
56  
57  
58  
59  
60

1  
2  
3 risk as is recommend when death rates exceed event rates[23] which was likely the case  
4  
5 because in the demographics of their study was very similar to ours.  
6  
7  
8  
9

10 In our study, AMX treated patients exhibited a similar absolute risk of TR as to LVX  
11 treated patients (7.56 vs. 7.47 per 1000 patient-years). However, they had fewer  
12 comorbidities (as in Daneman's study), almost 14% fewer hospitalizations and half of  
13 death rate, compared to patients taking LVX (7.56 vs. 18.50 per 1000 patient-years). So  
14 the two populations are not comparable. LVX exhibited 119% increased risk of death in a  
15  $\leq 30$ -day window. They appears to be reserved for more severe infections or more fragile  
16 patients and thus subject to differential biases.  
17  
18  
19  
20  
21  
22  
23  
24  
25  
26  
27

28 The reported activation of metalloprotease activity by FQs has underpinned the idea of a  
29 causal link between FQs and TRs. The argument goes as follows: FQs stimulate  
30 metalloproteases, which can break down collagen; the tendon is made of collagen; so FQs  
31 may cause TRs. However, our data disrupts this argument. CIP which strongly *stimulates*  
32 metalloprotease activity,[17,18] exhibited *no* risk of TRs in our study, and LEX which  
33 *inhibits* metalloprotease activity[44,45] exhibited a *large* risk. So we have to question  
34 whether metalloprotease activity has any relevance to TR risk, and consider other  
35 explanations for the observed associations.  
36  
37  
38  
39  
40  
41  
42  
43  
44  
45  
46  
47  
48

49 The indication for an antibiotic is a presumed bacterial infection. The reported  
50 associations between antibiotics and TR could be a consequence of the indication  
51 (infection) rather than the antibiotic use to treat it. It could be a perfects example of the  
52  
53  
54  
55  
56  
57  
58  
59  
60

1  
2  
3 confounding by indication.[46] Such a bias could explain many reported associations  
4  
5 between drugs and TR risk including associations with non-antibiotic drugs reported by  
6  
7 Nyyssönen.[8]  
8  
9

10  
11  
12 This indication (and infection) bias could generate an association between the antibiotic  
13  
14 and TRs in different ways. First, the bacterial infection might directly increase the risk of  
15  
16 TR via stimulation of general immune or cytokine responses, or even by direct bacterial  
17  
18 invasion. A recent study found gram-positive bacteria in a major share of ruptured  
19  
20 tendons but not in “control” tendons removed surgically for grafting,[47] So the  
21  
22 possibility of direct invasion of tendons by circulating bacteria with subsequent  
23  
24 weakening and rupture is plausible.  
25  
26  
27  
28  
29

30  
31 Secondly, the greater clinical attention likely focused on patients needing systemic  
32  
33 antibiotics, especially those with more severe infections, could increase the chance of  
34  
35 noticing and documenting a pre-existing TR. A reservoir of not-yet-diagnosed such cases  
36  
37 is likely to exist, because patients do not necessarily correctly identify joint and extremity  
38  
39 symptoms as TRs and seek immediate care for them. Tendon ruptures of the shoulder  
40  
41 capsule, for example, are notorious for developing symptoms slowly over 2-3 years[48]  
42  
43 before being correctly diagnosed. Even Achilles tendon ruptures, can be missed (in 30%  
44  
45 of cases) at the first presentation.[49] Seeger et al. reviewed the medical records of  
46  
47 patients with an insurance claim reporting TRs following antibiotic use and found that  
48  
49 nearly half of the TRs recorded in the claims were either something else (e.g., Bursa  
50  
51  
52  
53  
54  
55  
56  
57  
58  
59  
60

1  
2  
3 inflammation miscoded as a TR) or had occurred pre antibiotic use but only seen in a  
4 claim post antibiotic use.[11]  
5  
6  
7  
8  
9

10 Indication bias is a plausible explanations for associations reported in observational  
11 studies and it should be considered more often before assuming the associations are  
12 causal.  
13  
14  
15

### 16 17 18 19 **Limitation**

20 This study faces all of the limitations of observational studies. Furthermore, it applies  
21 only to fee-for-service Medicare populations. In addition, we had no options to verify  
22 claims diagnoses via chart review. From a statistical point of view, our findings may have  
23 some limitations. First, we included 80 covariates in one analysis and concern about  
24 intercorrelation affecting the validity could exist. To evaluate the intercorrelation, we  
25 calculated an 80x80 correlation matrix of estimated regression which can deliver  
26 information about the strength of intercorrelation and indicate the existence of a collinear  
27 relationship between two predictors. All pairwise correlations (except diagonal elements)  
28 were below 0.5, and the largest was 0.33 indicating minimal bias due to intercorrelation.  
29 We also did not consider interactions among covariates in our main analysis because of  
30 the problem of overfitting. We ran 4 sensitivity analyses with interaction terms between  
31 the study medications and 4 covariates (rheumatoid arthritis/osteoarthritis, obesity,  
32 female sex, lung cancer). The inclusion of interactions did not change our conclusion of  
33 no TR risk for FQ as a class.  
34  
35  
36  
37  
38  
39  
40  
41  
42  
43  
44  
45  
46  
47  
48  
49  
50  
51  
52  
53  
54  
55  
56  
57  
58  
59  
60



### **Funding Statement**

This study is supported by the Intramural Research Program of the National Library of Medicine, National Institutes of Health.

### **Competing interests Statement**

All authors have no competing interest to declare.

### **Contributorship Statement**

SB: study conception, design, analysis and interpretation; critical review of study content; manuscript drafting; approval of the final manuscript. JL: study concept and interpretation; manuscript drafting; approval of the final manuscript. VH: study interpretation; manuscript drafting; approval of the final manuscript. CJM: study conception, design and interpretation; critical review of study content; manuscript drafting; approval of the final manuscript.

### **Data availability**

The authors confirm that the data supporting the findings of this study are available within the article [and/or] its supplementary materials.

**Patient Consent for publication:** Not required.

## Acknowledgements

Jason Lau was with National Institutes of Health (NIH) during this work and now he is with the UC Davis Health.

This work was partially supported by the Intramural Research Program of the National Library of Medicine, National Institutes of Health.

This research was made possible through the National Institutes of Health (NIH) Medical Research Scholars Program, a public-private partnership supported jointly by the NIH and generous contributions to the Foundation for the NIH from the Doris Duke Charitable Foundation, Genentech, the American Association for Dental Research, the Colgate-Palmolive Company, Elsevier, alumni of student research programs, and other individual supporters via contributions to the Foundation for the National Institutes of Health. For a complete list, please visit the Foundation website at: <http://fnih.org/what-we-do/current-education-and-training-programs/mrsp>

## References

- 1 Hicks LA, Bartoces MG, Roberts RM, *et al.* US outpatient antibiotic prescribing variation according to geography, patient population, and provider specialty in 2011. *Clin Infect Dis* 2015;**60**:1308–16. doi:10.1093/cid/civ076
- 2 Magill SS, Edwards JR, Beldavs ZG, *et al.* Prevalence of Antimicrobial Use in US Acute Care Hospitals, May-September 2011. *JAMA* 2014;**312**:1438. doi:10.1001/jama.2014.12923
- 3 Daneman N, Lu H, Redelmeier DA. Fluoroquinolones and collagen associated severe adverse events: a longitudinal cohort study. *BMJ Open* 2015;**5**:e010077. doi:10.1136/bmjopen-2015-010077
- 4 Morales DR, Slattery J, Pacurariu A, *et al.* Relative and Absolute Risk of Tendon Rupture with Fluoroquinolone and Concomitant Fluoroquinolone/Corticosteroid Therapy: Population-Based Nested Case–Control Study. *Clin Drug Investig* 2019;**39**:205–13. doi:10.1007/s40261-018-0729-y
- 5 van der Linden PD, Sturkenboom MCJM, Herings RMC, *et al.* Increased Risk of Achilles Tendon Rupture With Quinolone Antibacterial Use, Especially in Elderly Patients Taking Oral Corticosteroids. *Arch Intern Med* 2003;**163**:1801. doi:10.1001/archinte.163.15.1801
- 6 Wise BL, Peloquin C, Choi H, *et al.* Impact of age, sex, obesity, and steroid use on quinolone-associated tendon disorders. *Am J Med* 2012;**125**:1228.e23-1228.e28. doi:10.1016/j.amjmed.2012.05.027
- 7 Sode J, Obel N, Hallas J, *et al.* Use of fluoroquinolone and risk of Achilles tendon rupture: a population-based cohort study. *Eur J Clin Pharmacol* 2007;**63**:499–503.

- 1  
2  
3 doi:10.1007/s00228-007-0265-9  
4  
5  
6 8 Nyysönen T, Lantto I, Lüthje P, *et al.* Drug treatments associated with Achilles tendon  
7  
8 rupture. A case-control study involving 1118 Achilles tendon ruptures. *Scand J Med Sci*  
9  
10 *Sports* 2018;**28**:2625–9. doi:10.1111/sms.13281  
11  
12 9 WILTON L V., PEARCE GL, MANN RD. A comparison of ciprofloxacin, norfloxacin,  
13  
14 ofloxacin, azithromycin and cefixime examined by observational cohort studies. *Br J Clin*  
15  
16 *Pharmacol* 2003;**41**:277–84. doi:10.1046/j.1365-2125.1996.03013.x  
17  
18  
19 10 Jupiter DC, Fang X, Ashmore Z, *et al.* The Relative Risk of Achilles Tendon Injury in  
20  
21 Patients Taking Quinolones. *Pharmacother J Hum Pharmacol Drug Ther* 2018;**38**:878–  
22  
23 87. doi:10.1002/phar.2162  
24  
25  
26 11 Seeger JD, West WA, Fife D, *et al.* Achilles tendon rupture and its association with  
27  
28 fluoroquinolone antibiotics and other potential risk factors in a managed care population.  
29  
30 *Pharmacoepidemiol Drug Saf* 2006;**15**:784–92. doi:10.1002/pds.1214  
31  
32  
33 12 Hori K, Yamakawa K, Yoshida N, *et al.* Detection of fluoroquinolone-induced tendon  
34  
35 disorders using a hospital database in Japan. *Pharmacoepidemiol Drug Saf* 2012;**21**:886–  
36  
37 9. doi:10.1002/pds.3285  
38  
39  
40 13 Tanne JH. FDA adds ‘black box’ warning label to fluoroquinolone antibiotics. *BMJ*  
41  
42 2008;**337**:a816. doi:10.1136/bmj.a816  
43  
44  
45 14 Food and Drug Administration. FDA Drug Safety Communication: FDA advises  
46  
47 restricting fluoroquinolone antibiotic use for certain uncomplicated infections; warns  
48  
49 about disabling side effects that can occur together | FDA.  
50  
51 [https://www.fda.gov/drugs/drug-safety-and-availability/fda-drug-safety-communication-](https://www.fda.gov/drugs/drug-safety-and-availability/fda-drug-safety-communication-fda-advises-restricting-fluoroquinolone-antibiotic-use-certain)  
52  
53 [fda-advises-restricting-fluoroquinolone-antibiotic-use-certain](https://www.fda.gov/drugs/drug-safety-and-availability/fda-drug-safety-communication-fda-advises-restricting-fluoroquinolone-antibiotic-use-certain) (accessed 12 Jun 2019).  
54  
55  
56  
57  
58  
59  
60

- 1  
2  
3 15 Food and Drug Administration. FDA Drug Safety Communication: FDA updates  
4 warnings for oral and injectable fluoroquinolone antibiotics due to disabling side effects |  
5  
6 FDA. [https://www.fda.gov/drugs/drug-safety-and-availability/fda-drug-safety-](https://www.fda.gov/drugs/drug-safety-and-availability/fda-drug-safety-communication-fda-updates-warnings-oral-and-injectable-fluoroquinolone-antibiotics)  
7  
8 communication-fda-updates-warnings-oral-and-injectable-fluoroquinolone-antibiotics  
9  
10 (accessed 12 Jun 2019).  
11  
12  
13  
14  
15 16 Del Buono A, Oliva F, Osti L, *et al.* Metalloproteases and tendinopathy. *Muscles*  
16  
17 *Ligaments Tendons J* 2013;**3**:51–7. doi:10.11138/mltj/2013.3.1.051  
18  
19  
20 17 Tsai WC, Hsu CC, Chen CPC, *et al.* Ciprofloxacin up-regulates tendon cells to express  
21  
22 matrix metalloproteinase-2 with degradation of type i collagen. *J Orthop Res* 2011;**29**:67–  
23  
24 73. doi:10.1002/jor.21196  
25  
26  
27 18 Corps AN, Harrall RL, Curry VA, *et al.* Ciprofloxacin enhances the stimulation of matrix  
28  
29 metalloproteinase 3 expression by interleukin-1 $\beta$  in human tendon-derived cells: A  
30  
31 potential mechanism of fluoroquinolone-induced tendinopathy. *Arthritis Rheum*  
32  
33 2002;**46**:3034–40. doi:10.1002/art.10617  
34  
35  
36 19 CMS Virtual Research Data Center (VRDC) | ResDAC. [https://www.resdac.org/cms-](https://www.resdac.org/cms-virtual-research-data-center-vrdc)  
37  
38 virtual-research-data-center-vrdc (accessed 4 Oct 2019).  
39  
40  
41 20 Cubanski J, Swoope C, Boccuti C, *et al.* A Primer on Medicare. 2015.  
42  
43 [http://files.kff.org/attachment/report-a-primer-on-medicare-key-facts-about-the-medicare-](http://files.kff.org/attachment/report-a-primer-on-medicare-key-facts-about-the-medicare-program-and-the-people-it-covers)  
44  
45 program-and-the-people-it-covers (accessed 7 Feb 2019).  
46  
47  
48 21 Johnson ES, Bartman BA, Briesacher BA, *et al.* The incident user design in comparative  
49  
50 effectiveness research. *Pharmacoepidemiol Drug Saf* 2013;**22**:1–6. doi:10.1002/pds.3334  
51  
52  
53 22 Fine JP, Gray RJ. A Proportional Hazards Model for the Subdistribution of a Competing  
54  
55 Risk. *J Am Stat Assoc* 1999;**94**:496. doi:10.2307/2670170  
56  
57  
58  
59  
60

- 1  
2  
3 23 Berry SD, Ngo L, Samelson EJ, *et al.* Competing risk of death: An important  
4 consideration in studies of older adults. *J Am Geriatr Soc* 2010;**58**:783–7.  
5  
6 doi:10.1111/j.1532-5415.2010.02767.x  
7  
8  
9  
10 24 Putter H, Fiocco M, Geskus RB. Tutorial in biostatistics: competing risks and multi-state  
11 models. *Stat Med* 2007;**26**:2389–430. doi:10.1002/sim.2712  
12  
13  
14 25 The Medicare Payment Advisory Commission. MedPAC Data book: Beneficiaries dually  
15 eligible for Medicare and Medicaid - January 2016. 2016.  
16  
17 [http://www.medpac.gov/docs/default-source/publications/january-2016-medpac-and-](http://www.medpac.gov/docs/default-source/publications/january-2016-medpac-and-macpac-data-book-beneficiaries-dually-eligible-for-medicare-and-medicaid.pdf?sfvrsn=0)  
18  
19 [macpac-data-book-beneficiaries-dually-eligible-for-medicare-and-medicaid.pdf?sfvrsn=0](http://www.medpac.gov/docs/default-source/publications/january-2016-medpac-and-macpac-data-book-beneficiaries-dually-eligible-for-medicare-and-medicaid.pdf?sfvrsn=0)  
20  
21 (accessed 23 Jan 2017).  
22  
23  
24  
25  
26 26 The Chronic Condition Warehouse. Chronic Conditions Data Warehouse: CCW Chronic  
27 Condition Algorithms. <https://www.ccwdata.org/web/guest/condition-categories> (accessed  
28  
29 23 Jan 2017).  
30  
31  
32  
33 27 Stricker BHC, Stijnen T. Analysis of individual drug use as a time-varying determinant of  
34 exposure in prospective population-based cohort studies. *Eur J Epidemiol* 2010;**25**:245–  
35  
36 51. doi:10.1007/s10654-010-9451-7  
37  
38  
39  
40 28 Shariff SZ, Cuerden MS, Jain AK, *et al.* The secret of immortal time bias in  
41 epidemiologic studies. *J Am Soc Nephrol* 2008;**19**:841–3. doi:10.1681/ASN.2007121354  
42  
43  
44 29 Shintani AK, Girard TD, Eden SK, *et al.* Immortal time bias in critical care research:  
45 application of time-varying Cox regression for observational cohort studies. *Crit Care*  
46  
47 *Med* 2009;**37**:2939–45. doi:10.1097/CCM.0b013e3181b7fbbb  
48  
49  
50  
51 30 Rosenbaum PR, Rubin DB. The Central Role of the Propensity Score in Observational  
52  
53 Studies for Causal Effects. *Biometrika* 1983;**70**:41–55.  
54  
55  
56  
57  
58  
59  
60

- 1  
2  
3 31 Austin PC. An Introduction to Propensity Score Methods for Reducing the Effects of  
4 Confounding in Observational Studies. *Multivariate Behav Res* 2011;**46**:399–424.  
5  
6 doi:10.1080/00273171.2011.568786  
7  
8  
9  
10 32 Austin PC, Stuart EA. The performance of inverse probability of treatment weighting and  
11 full matching on the propensity score in the presence of model misspecification when  
12 estimating the effect of treatment on survival outcomes. *Stat Methods Med Res*  
13 2017;**26**:1654–70. doi:10.1177/0962280215584401  
14  
15  
16  
17  
18 33 Zakaria MHB, Davis WA, Davis TME. Incidence and predictors of hospitalization for  
19 tendon rupture in Type 2 diabetes: the Fremantle Diabetes Study. *Diabet Med*  
20 2014;**31**:425–30. doi:10.1111/dme.12344  
21  
22  
23  
24  
25 34 Basic-Jukic N, Juric I, Racki S, *et al.* Spontaneous tendon ruptures in patients with end-  
26 stage renal disease. *Kidney Blood Press Res* 2009;**32**:32–6. doi:10.1159/000201792  
27  
28  
29  
30 35 Jafari M, Ansari-Pour N. Why, when and how to adjust your P values? *Cell J*  
31 2019;**20**:604–7. doi:10.22074/cellj.2019.5992  
32  
33  
34 36 Khaliq Y, Zhanel GG. Fluoroquinolone-Associated Tendinopathy: A Critical Review of  
35 the Literature. *Clin Infect Dis* 2003;**36**:1404–10. doi:10.1086/375078  
36  
37  
38 37 White DW, Wenke JC, Mosely DS, *et al.* Incidence of Major Tendon Ruptures and  
39 Anterior Cruciate Ligament Tears in US Army Soldiers. *Am J Sports Med* 2007;**35**:1308–  
40 14. doi:10.1177/0363546507301256  
41  
42  
43  
44  
45 38 Owens B, Mountcastle S, White D. Racial Differences in Tendon Rupture Incidence. *Int J*  
46 *Sports Med* 2007;**28**:617–20. doi:10.1055/s-2007-964837  
47  
48  
49  
50 39 Corps AN, Harrall RL, Curry VA, *et al.* Contrasting effects of fluoroquinolone antibiotics  
51 on the expression of the collagenases, matrix metalloproteinases (MMP)-1 and -13, in  
52  
53  
54  
55  
56  
57  
58  
59  
60

- 1  
2  
3 human tendon-derived cells. *Rheumatology* 2005;**44**:1514–7.  
4  
5 doi:10.1093/rheumatology/kei087  
6  
7  
8 40 Sharma C, Velpandian T, Baskar Singh S, *et al.* Effect of fluoroquinolones on the  
9  
10 expression of matrix metalloproteinase in debrided cornea of rats. *Toxicol Mech Methods*  
11  
12 2011;**21**:6–12. doi:10.3109/15376516.2010.529183  
13  
14  
15 41 Sbardella D, Tundo G, Fasciglione G, *et al.* Role of Metalloproteinases in Tendon  
16  
17 Pathophysiology. *Mini-Reviews Med Chem* 2014;**14**:978–87.  
18  
19 doi:10.2174/1389557514666141106132411  
20  
21  
22 42 Arabyat RM, Raisch DW, McKoy JM, *et al.* Fluoroquinolone-associated tendon-rupture: a  
23  
24 summary of reports in the Food and Drug Administration’s adverse event reporting  
25  
26 system. *Expert Opin Drug Saf* 2015;**14**:1653–60. doi:10.1517/14740338.2015.1085968  
27  
28  
29 43 Sakaeda T, Tamon A, Kadoyama K, *et al.* Data mining of the public version of the FDA  
30  
31 Adverse Event Reporting System. *Int J Med Sci* 2013;**10**:796–803. doi:10.7150/ijms.6048  
32  
33  
34 44 Santavirta S, Takagi M, Kontinen YT, *et al.* Inhibitory effect of cephalothin on matrix  
35  
36 metalloproteinase activity around loose hip prostheses. *Antimicrob Agents Chemother*  
37  
38 1996;**40**:244–6. doi:10.1128/AAC.40.1.244  
39  
40  
41 45 Kannan R, Ruff M, Kochins JG, *et al.* Purification of Active Matrix Metalloproteinase  
42  
43 Catalytic Domains and Its Use for Screening of Specific Stromelysin-3 Inhibitors. *Protein*  
44  
45 *Expr Purif* 1999;**16**:76–83. doi:10.1006/PREP.1999.1068  
46  
47  
48 46 de Koning JS, Klazinga NS, Koudstaal PJ, *et al.* The role of ‘confounding by indication’  
49  
50 in assessing the effect of quality of care on disease outcomes in general practice: results of  
51  
52 a case-control study. *BMC Health Serv Res* 2005;**5**:10. doi:10.1186/1472-6963-5-10  
53  
54  
55 47 Rolf CG, Fu S-C, Hopkins C, *et al.* Presence of Bacteria in Spontaneous Achilles Tendon  
56  
57  
58  
59  
60



1  
2  
3 Ruptures. *Am J Sports Med* 2017;**45**:2061–7. doi:10.1177/0363546517696315

4  
5 48 Tashjian RZ. Epidemiology, Natural History, and Indications for Treatment of Rotator

6  
7 Cuff Tears. *Clin Sports Med* 2012;**31**:589–604. doi:10.1016/J.CSM.2012.07.001

8  
9 49 Christensen I. Rupture of the Achilles tendon; analysis of 57 cases. *Acta Chir Scand*

10  
11 1953;**106**:50–60.  
12  
13  
14  
15  
16  
17  
18  
19  
20  
21  
22  
23  
24  
25  
26  
27  
28  
29  
30  
31  
32  
33  
34  
35  
36  
37  
38  
39  
40  
41  
42  
43  
44  
45  
46  
47  
48  
49  
50  
51  
52  
53  
54  
55  
56  
57  
58  
59  
60

1  
2  
3 **Figure 1. Consort Diagram**  
4  
5  
6  
7  
8  
9  
10  
11  
12  
13  
14  
15  
16  
17  
18  
19  
20  
21  
22  
23  
24  
25  
26  
27  
28  
29  
30  
31  
32  
33  
34  
35  
36  
37  
38  
39  
40  
41  
42  
43  
44  
45  
46  
47  
48  
49  
50  
51  
52  
53  
54  
55  
56  
57  
58  
59  
60

For peer review only

**Table 1. Outcome, Medical/Medication Use, Diseases and Patient Characteristics by Type of Antibiotics**

| Variable                                 | Overall         | FLQ             | CIP             | LVX             | MXF             | AMX             | AZM             | LEX             | AMC             | None           |
|------------------------------------------|-----------------|-----------------|-----------------|-----------------|-----------------|-----------------|-----------------|-----------------|-----------------|----------------|
| N                                        | 1,009,925       | 328,654         | 234,994         | 155,991         | 14,728          | 259,125         | 308,985         | 195,731         | 179,616         | 356,364        |
| Tendon Rupture                           | 34,880(3.5)     | 12,517(3.8)     | 8,811(3.7)      | 5,904(3.8)      | 770(5.2)        | 9,636(3.7)      | 12,448(4.0)     | 8,019(4.1)      | 6,622(3.7)      | 10,169(2.9)    |
| Death                                    | 46,468(4.6)     | 23,249(7.1)     | 14,821(6.3)     | 14,610(9.4)     | 2,136(14.5)     | 9,632(3.7)      | 14,608(4.7)     | 11,394(5.8)     | 9,951(5.5)      | 13,645(3.8)    |
| Censored at HMO entry                    | 127,162(12.6)   | 27,573(8.4)     | 19,847(8.4)     | 11,142(7.1)     | 1,571(10.7)     | 21,215(8.2)     | 26,140(8.5)     | 14,887(7.6)     | 12,674(7.1)     | 65,886(18.5)   |
| Censored at disenrollment                | 145(0.0)        | 25(0.0)         | 13(0.0)         | 13(0.0)         | 2(0.0)          | 19(0.0)         | 27(0.0)         | 23(0.0)         | 16(0.0)         | 85(0.0)        |
| Censored at Dec 31 2016                  | 801,270(79.3)   | 265,290(80.7)   | 191,502(81.5)   | 124,322(79.7)   | 10,249(69.6)    | 218,623(84.4)   | 255,762(82.8)   | 161,408(82.5)   | 150,353(83.7)   | 266,579(74.8)  |
| Years of follow-up, median(total)        | 3.6(4,030,897)  | 4.6(1,620,894)  | 4.8(1,190,308)  | 4.8(789,849)    | 6.0(87,397)     | 4.5(1,274,357)  | 4.6(1,529,370)  | 4.8(1,000,459)  | 4.6(890,340)    | 2.5(1,067,731) |
| Tendon rupture, 1000 person-years        | 8.65            | 7.72            | 7.40            | 7.47            | 8.81            | 7.56            | 8.14            | 8.02            | 7.44            | 9.52           |
| Death, 1000 person-years                 | 11.53           | 14.34           | 12.45           | 18.50           | 24.44           | 7.56            | 9.55            | 11.39           | 11.18           | 12.78          |
| Female                                   | 575,885(57.0)   | 197,915(60.2)   | 146,745(62.4)   | 89,682(57.5)    | 8,747(59.4)     | 151,383(58.4)   | 194,101(62.8)   | 113,308(57.9)   | 104,749(58.3)   | 191,069(53.6)  |
| White                                    | 814,933(80.7)   | 274,785(83.6)   | 196,048(83.4)   | 131,725(84.4)   | 12,464(84.6)    | 215,101(83.0)   | 259,657(84.0)   | 167,825(85.7)   | 153,723(85.6)   | 271,906(76.3)  |
| Black                                    | 75,930(7.5)     | 20,017(6.1)     | 14,286(6.1)     | 8,893(5.7)      | 956(6.5)        | 15,622(6.0)     | 17,296(5.6)     | 9,625(4.9)      | 9,199(5.1)      | 35,023(9.8)    |
| Hispanic                                 | 56,582(5.6)     | 17,044(5.2)     | 12,607(5.4)     | 7,943(5.1)      | 628(4.3)        | 12,494(4.8)     | 14,805(4.8)     | 8,976(4.6)      | 7,802(4.3)      | 24,391(6.8)    |
| Asian                                    | 26,336(2.6)     | 7,316(2.2)      | 5,362(2.3)      | 3,144(2.0)      | 356(2.4)        | 7,624(2.9)      | 7,945(2.6)      | 3,539(1.8)      | 3,440(1.9)      | 10,437(2.9)    |
| Other                                    | 36,144(3.6)     | 9,492(2.9)      | 6,691(2.8)      | 4,286(2.7)      | 324(2.2)        | 8,284(3.2)      | 9,282(3.0)      | 5,766(2.9)      | 5,452(3.0)      | 14,607(4.1)    |
| Ever Dual                                | 162,988(16.1)   | 54,055(16.4)    | 38,277(16.3)    | 28,156(18.0)    | 2,908(19.7)     | 35,305(13.6)    | 44,940(14.5)    | 30,962(15.8)    | 25,255(14.1)    | 66,986(18.8)   |
| Non-Dual LIS                             | 26,955(2.7)     | 7,648(2.3)      | 5,459(2.3)      | 3,746(2.4)      | 385(2.6)        | 5,224(2.0)      | 6,828(2.2)      | 4,191(2.1)      | 3,818(2.1)      | 12,595(3.5)    |
| Non-Dual No LIS                          | 819,982(81.2)   | 266,951(81.2)   | 191,258(81.4)   | 124,089(79.5)   | 11,435(77.6)    | 218,596(84.4)   | 257,217(83.2)   | 160,578(82.0)   | 150,543(83.8)   | 276,783(77.7)  |
| Living in rural area                     | 228,199(22.6)   | 78,581(23.9)    | 56,385(24.0)    | 38,847(24.9)    | 2,801(19.0)     | 58,805(22.7)    | 72,282(23.4)    | 49,977(25.5)    | 42,288(23.5)    | 77,087(21.6)   |
| Days on Rx, median (IQR)                 | N/A             | N/A             | 10.0(7.0-20.0)  | 10.0(7.0-17.0)  | 10.0(7.0-12.0)  | 10.0(7.0-20.0)  | 5.0(5.0-11.0)   | 10.0(7.0-16.0)  | 10.0(10.0-20.0) | N/A            |
| Hospitalization                          | 349,959(29.5)   | 198,846(45.4)   | 142,538(45.3)   | 113,829(52.5)   | 14,002(60.3)    | 132,304(38.8)   | 156,185(37.9)   | 119,209(45.9)   | 103,515(42.5)   | 51,525(14.4)   |
| Outpatient visits per year, median (IQR) | 19.6(11.1-33.0) | 27.1(17.2-42.7) | 27.3(17.5-42.9) | 30.1(19.0-47.8) | 34.0(21.7-53.7) | 23.6(14.5-37.5) | 24.6(15.5-38.8) | 27.5(17.2-43.2) | 26.6(16.7-42.2) | 12.3(6.0-21.8) |
| AMI                                      | 21,222(2.1)     | 9,999(3.0)      | 6,810(2.9)      | 5,862(3.8)      | 698(4.7)        | 6,474(2.5)      | 8,079(2.6)      | 6,215(3.2)      | 5,292(2.9)      | 5,012(1.4)     |
| Atrial Fibrillation                      | 71,635(7.1)     | 31,752(9.7)     | 21,757(9.3)     | 17,731(11.4)    | 2,028(13.8)     | 23,974(9.3)     | 26,182(8.5)     | 21,935(11.2)    | 18,764(10.4)    | 16,314(4.6)    |
| Cataract                                 | 468,608(46.4)   | 183,870(55.9)   | 134,196(57.1)   | 88,574(56.8)    | 9,216(62.6)     | 144,455(55.7)   | 174,897(56.6)   | 112,020(57.2)   | 101,079(56.3)   | 124,931(35.1)  |
| Chronic Kidney Disease                   | 180,441(17.9)   | 86,021(26.2)    | 62,323(26.5)    | 46,121(29.6)    | 4,651(31.6)     | 53,713(20.7)    | 65,577(21.2)    | 50,361(25.7)    | 43,182(24.0)    | 42,916(12.0)   |
| COPD                                     | 130,840(13.0)   | 71,913(21.9)    | 43,961(18.7)    | 48,430(31.0)    | 6,106(41.5)     | 40,109(15.5)    | 66,536(21.5)    | 37,413(19.1)    | 37,579(20.9)    | 22,739(6.4)    |
| Heart Failure                            | 103,010(10.2)   | 51,814(15.8)    | 34,870(14.8)    | 31,377(20.1)    | 3,776(25.6)     | 32,792(12.7)    | 41,647(13.5)    | 31,585(16.1)    | 27,223(15.2)    | 21,907(6.1)    |
| Diabetes                                 | 284,919(28.2)   | 113,424(34.5)   | 81,175(34.5)    | 57,697(37.0)    | 5,942(40.3)     | 81,155(31.3)    | 98,176(31.8)    | 67,548(34.5)    | 59,984(33.4)    | 81,448(22.9)   |
| Glaucoma                                 | 150,839(14.9)   | 56,990(17.3)    | 41,984(17.9)    | 26,603(17.1)    | 2,930(19.9)     | 45,597(17.6)    | 54,726(17.7)    | 33,936(17.3)    | 31,065(17.3)    | 42,355(11.9)   |
| Hip/Pelvic Fracture                      | 7,982(0.8)      | 4,086(1.2)      | 3,000(1.3)      | 2,289(1.5)      | 274(1.9)        | 2,673(1.0)      | 3,005(1.0)      | 2,515(1.3)      | 1,914(1.1)      | 1,689(0.5)     |
| Ischemic Heart Disease                   | 264,648(26.2)   | 117,416(35.7)   | 82,182(35.0)    | 63,659(40.8)    | 6,956(47.2)     | 83,682(32.3)    | 101,999(33.0)   | 70,612(36.1)    | 63,363(35.3)    | 63,372(17.8)   |
| Depression                               | 210,714(20.9)   | 94,554(28.8)    | 68,625(29.2)    | 49,277(31.6)    | 5,298(36.0)     | 65,642(25.3)    | 83,253(26.9)    | 56,747(29.0)    | 51,150(28.5)    | 49,320(13.8)   |
| Alzheimer's Disease or Senile Dementia   | 39,132(3.9)     | 19,796(6.0)     | 14,309(6.1)     | 11,030(7.1)     | 1,206(8.2)      | 11,140(4.3)     | 13,809(4.5)     | 11,846(6.1)     | 9,309(5.2)      | 9,400(2.6)     |
| Osteoporosis                             | 106,966(10.6)   | 47,033(14.3)    | 35,217(15.0)    | 22,918(14.7)    | 2,738(18.6)     | 34,610(13.4)    | 44,016(14.2)    | 26,996(13.8)    | 24,393(13.6)    | 25,216(7.1)    |

|                                                              |               |               |               |               |              |               |               |               |               |               |
|--------------------------------------------------------------|---------------|---------------|---------------|---------------|--------------|---------------|---------------|---------------|---------------|---------------|
| <b>Rheumatoid Arthritis/Osteoarthritis</b>                   | 369,584(36.6) | 160,091(48.7) | 117,018(49.8) | 80,115(51.4)  | 8,259(56.1)  | 126,702(48.9) | 148,653(48.1) | 101,310(51.8) | 88,017(49.0)  | 81,855(23.0)  |
| <b>1 Stroke/Transient Ischemic Attack</b>                    | 58,886(5.8)   | 27,702(8.4)   | 19,843(8.4)   | 15,051(9.6)   | 1,670(11.3)  | 17,829(6.9)   | 22,038(7.1)   | 16,684(8.5)   | 14,245(7.9)   | 14,262(4.0)   |
| <b>2 Breast Cancer</b>                                       | 45,316(4.5)   | 19,362(5.9)   | 14,344(6.1)   | 9,442(6.1)    | 984(6.7)     | 13,451(5.2)   | 17,676(5.7)   | 12,543(6.4)   | 10,156(5.7)   | 11,042(3.1)   |
| <b>3 Colorectal Cancer</b>                                   | 15,905(1.6)   | 7,487(2.3)    | 5,421(2.3)    | 4,048(2.6)    | 390(2.6)     | 4,304(1.7)    | 5,170(1.7)    | 4,085(2.1)    | 3,605(2.0)    | 4,104(1.2)    |
| <b>4 Prostate Cancer</b>                                     | 37,038(3.7)   | 19,705(6.0)   | 15,577(6.6)   | 9,232(5.9)    | 643(4.4)     | 10,967(4.2)   | 11,733(3.8)   | 9,252(4.7)    | 8,070(4.5)    | 8,333(2.3)    |
| <b>5 Lung Cancer</b>                                         | 14,946(1.5)   | 8,965(2.7)    | 5,144(2.2)    | 6,356(4.1)    | 905(6.1)     | 3,859(1.5)    | 6,633(2.1)    | 3,977(2.0)    | 4,267(2.4)    | 2,733(0.8)    |
| <b>6 Endometrial Cancer</b>                                  | 7,396(0.7)    | 3,447(1.0)    | 2,670(1.1)    | 1,635(1.0)    | 160(1.1)     | 2,095(0.8)    | 2,637(0.9)    | 1,957(1.0)    | 1,604(0.9)    | 1,847(0.5)    |
| <b>8 Anemia</b>                                              | 307,310(30.4) | 140,606(42.8) | 100,819(42.9) | 74,308(47.6)  | 7,980(54.2)  | 99,190(38.3)  | 118,327(38.3) | 81,967(41.9)  | 72,587(40.4)  | 71,098(20.0)  |
| <b>9 Asthma</b>                                              | 86,120(8.5)   | 46,350(14.1)  | 29,327(12.5)  | 30,152(19.3)  | 4,091(27.8)  | 27,632(10.7)  | 46,823(15.2)  | 24,426(12.5)  | 25,465(14.2)  | 13,802(3.9)   |
| <b>10 Hyperlipidemia</b>                                     | 691,148(68.4) | 257,086(78.2) | 185,199(78.8) | 123,828(79.4) | 12,162(82.6) | 199,236(76.9) | 239,414(77.5) | 152,879(78.1) | 140,364(78.1) | 201,258(56.5) |
| <b>1 Hyperplasia</b>                                         | 122,010(12.1) | 59,809(18.2)  | 45,517(19.4)  | 28,616(18.3)  | 2,587(17.6)  | 39,031(15.1)  | 42,070(13.6)  | 31,606(16.1)  | 28,398(15.8)  | 27,336(7.7)   |
| <b>1 Hypertension</b>                                        | 679,287(67.3) | 253,601(77.2) | 181,231(77.1) | 124,646(79.9) | 12,218(83.0) | 192,686(74.4) | 230,409(74.6) | 150,995(77.1) | 136,292(75.9) | 201,777(56.6) |
| <b>1 Hypothyroidism</b>                                      | 197,447(19.6) | 81,468(24.8)  | 59,450(25.3)  | 40,372(25.9)  | 4,198(28.5)  | 59,893(23.1)  | 76,582(24.8)  | 47,973(24.5)  | 44,249(24.6)  | 50,280(14.1)  |
| <b>1 Anxiety Disorders</b>                                   | 148,983(14.8) | 70,688(21.5)  | 51,377(21.9)  | 37,563(24.1)  | 4,032(27.4)  | 48,859(18.9)  | 62,418(20.2)  | 41,655(21.3)  | 37,588(20.9)  | 31,709(8.9)   |
| <b>1 Bipolar Disorder</b>                                    | 17,882(1.8)   | 8,368(2.5)    | 6,104(2.6)    | 4,533(2.9)    | 468(3.2)     | 5,442(2.1)    | 6,658(2.2)    | 5,147(2.6)    | 4,227(2.4)    | 4,242(1.2)    |
| <b>1 Major Depressive Affective Disorder</b>                 | 153,182(15.2) | 71,732(21.8)  | 52,101(22.2)  | 38,055(24.4)  | 4,148(28.2)  | 48,846(18.9)  | 61,872(20.0)  | 43,416(22.2)  | 38,642(21.5)  | 33,660(9.4)   |
| <b>1 Schizophrenia and other Psychotic Disorders</b>         | 16,764(1.7)   | 8,591(2.6)    | 6,176(2.6)    | 4,934(3.2)    | 548(3.7)     | 4,421(1.7)    | 5,597(1.8)    | 5,101(2.6)    | 3,811(2.1)    | 4,300(1.2)    |
| <b>18 Epilepsy</b>                                           | 16,155(1.6)   | 7,543(2.3)    | 5,383(2.3)    | 4,269(2.7)    | 415(2.8)     | 4,310(1.7)    | 5,488(1.8)    | 4,510(2.3)    | 3,621(2.0)    | 4,191(1.2)    |
| <b>19 Fibromyalgia, Chronic Pain and Fatigue</b>             | 166,279(16.5) | 78,877(24.0)  | 57,494(24.5)  | 41,843(26.8)  | 4,410(29.9)  | 56,152(21.7)  | 70,667(22.9)  | 48,422(24.7)  | 43,379(24.2)  | 33,843(9.5)   |
| <b>20 Viral Hepatitis (General)</b>                          | 11,969(1.2)   | 4,659(1.4)    | 3,188(1.4)    | 2,523(1.6)    | 287(1.9)     | 3,156(1.2)    | 3,732(1.2)    | 2,712(1.4)    | 2,348(1.3)    | 3,735(1.0)    |
| <b>21 Liver Disease Cirrhosis and other Liver Conditions</b> | 62,675(6.2)   | 31,930(9.7)   | 23,284(9.9)   | 17,386(11.1)  | 1,919(13.0)  | 19,624(7.6)   | 24,544(7.9)   | 17,393(8.9)   | 15,958(8.9)   | 13,350(3.7)   |
| <b>22 Leukemias and Lymphomas</b>                            | 13,906(1.4)   | 7,228(2.2)    | 4,822(2.1)    | 4,536(2.9)    | 551(3.7)     | 4,385(1.7)    | 5,905(1.9)    | 4,025(2.1)    | 3,969(2.2)    | 2,758(0.8)    |
| <b>24 Migraine and other Chronic Headache</b>                | 31,628(3.1)   | 14,936(4.5)   | 11,282(4.8)   | 7,520(4.8)    | 873(5.9)     | 10,841(4.2)   | 13,893(4.5)   | 8,763(4.5)    | 8,403(4.7)    | 6,419(1.8)    |
| <b>25 Mobility Impairments</b>                               | 20,600(2.0)   | 10,182(3.1)   | 7,356(3.1)    | 5,767(3.7)    | 577(3.9)     | 5,372(2.1)    | 6,629(2.1)    | 5,995(3.1)    | 4,610(2.6)    | 5,439(1.5)    |
| <b>26 Obesity</b>                                            | 185,101(18.3) | 79,130(24.1)  | 56,609(24.1)  | 41,226(26.4)  | 3,997(27.1)  | 58,654(22.6)  | 69,611(22.5)  | 49,984(25.5)  | 43,740(24.4)  | 44,772(12.6)  |
| <b>27 Peripheral Vascular Disease</b>                        | 90,132(8.9)   | 45,276(13.8)  | 31,866(13.6)  | 25,977(16.7)  | 3,001(20.4)  | 28,747(11.1)  | 36,241(11.7)  | 28,343(14.5)  | 23,977(13.3)  | 18,446(5.2)   |
| <b>28 Tobacco Use Disorders</b>                              | 101,890(10.1) | 45,304(13.8)  | 28,907(12.3)  | 27,202(17.4)  | 3,042(20.7)  | 27,261(10.5)  | 37,860(12.3)  | 25,002(12.8)  | 22,975(12.8)  | 26,896(7.5)   |
| <b>29 Pressure Ulcers and Chronic Ulcers</b>                 | 30,345(3.0)   | 17,688(5.4)   | 12,800(5.4)   | 10,603(6.8)   | 1,196(8.1)   | 9,006(3.5)    | 10,926(3.5)   | 13,404(6.8)   | 9,960(5.5)    | 4,992(1.4)    |
| <b>30 Deafness and Hearing Impairment</b>                    | 59,576(5.9)   | 27,383(8.3)   | 19,976(8.5)   | 14,014(9.0)   | 1,609(10.9)  | 21,213(8.2)   | 25,498(8.3)   | 16,849(8.6)   | 16,787(9.3)   | 11,900(3.3)   |

Note. Data are presented as No. (%) of patients unless otherwise noted.

Abbreviations: FLQ, fluoroquinolone; CIP, ciprofloxacin; LVX, levofloxacin; MXF, moxifloxacin; AMX, Amoxicillin; AMC, Amoxicillin Clavulanate; AZT, Azithromycin; LEX, Cephalexin; IQR, interquartile range.

**Table 2. Hazard Ratios of Tendon Rupture for Each Covariate**

| Variables                                     | Reference                  | HR(95% CI)       |
|-----------------------------------------------|----------------------------|------------------|
| <b>Female</b>                                 | Male                       | 0.70(0.69,0.72)↓ |
| <b>Black</b>                                  |                            | 0.76(0.73,0.78)↓ |
| <b>Hispanic</b>                               | White                      | 0.91(0.87,0.94)↓ |
| <b>Asian</b>                                  |                            | 0.67(0.63,0.71)↓ |
| <b>Other</b>                                  |                            | 1.05(1.01,1.09)↑ |
| <b>Dual Ever</b>                              | Non-Dual Non-LIS           | 0.66(0.64,0.68)↓ |
| <b>Non-Dual Lis</b>                           |                            | 0.66(0.63,0.70)↓ |
| <b>Living In Rural Area</b>                   | No                         | 0.94(0.92,0.95)↓ |
| <b>Medicare Part D Since 2008</b>             |                            | 1.03(1.00,1.07)  |
| <b>Medicare Part D Since 2009</b>             |                            | 1.11(1.07,1.15)↑ |
| <b>Medicare Part D Since 2010</b>             |                            | 1.16(1.12,1.21)↑ |
| <b>Medicare Part D Since 2011</b>             |                            | 1.17(1.13,1.22)↑ |
| <b>Medicare Part D Since 2012</b>             | Medicare Part D Since 2007 | 1.12(1.08,1.16)↑ |
| <b>Medicare Part D Since 2013</b>             |                            | 1.03(1.00,1.07)  |
| <b>Medicare Part D Since 2013</b>             |                            | 1.05(1.01,1.09)↑ |
| <b>Medicare Part D Since 2015</b>             |                            | 0.91(0.87,0.96)↓ |
| <b>Medicare Part D Since 2016</b>             |                            | 0.93(0.19,4.55)  |
| <b>AMI</b>                                    | No                         | 0.74(0.69,0.79)↓ |
| <b>Atrial Fibrillation</b>                    | No                         | 0.94(0.91,0.97)↓ |
| <b>Cataract</b>                               | No                         | 1.23(1.21,1.25)↑ |
| <b>Chronic Kidney Disease</b>                 | No                         | 0.92(0.89,0.94)↓ |
| <b>COPD</b>                                   | No                         | 0.83(0.81,0.86)↓ |
| <b>Heart Failure</b>                          | No                         | 0.79(0.77,0.82)↓ |
| <b>Diabetes</b>                               | No                         | 0.98(0.96,0.99)↓ |
| <b>Glaucoma</b>                               | No                         | 1.10(1.08,1.12)↑ |
| <b>Hip/Pelvic Fracture</b>                    | No                         | 0.68(0.60,0.77)↓ |
| <b>Ischemic Heart Disease</b>                 | No                         | 1.10(1.08,1.12)↑ |
| <b>Depression</b>                             | No                         | 1.17(1.13,1.21)  |
| <b>Alzheimer's Disease or Senile Dementia</b> | No                         | 0.67(0.63,0.71)↓ |
| <b>Osteoporosis</b>                           | No                         | 1.03(1.01,1.06)↑ |
| <b>Rheumatoid Arthritis/Osteoarthritis</b>    | No                         | 2.84(2.80,2.89)↑ |
| <b>Stroke/Transient Ischemic Attack</b>       | No                         | 0.97(0.94,1.01)  |
| <b>Breast Cancer</b>                          | No                         | 0.94(0.91,0.98)↓ |
| <b>Colorectal Cancer</b>                      | No                         | 0.79(0.74,0.85)↓ |

|    |                                                           |    |                  |
|----|-----------------------------------------------------------|----|------------------|
| 1  | <b>Prostate Cancer</b>                                    | No | 1.03(0.99,1.07)  |
| 2  | <b>Lung Cancer</b>                                        | No | 0.39(0.34,0.45)↓ |
| 3  | <b>Endometrial Cancer</b>                                 | No | 0.85(0.77,0.94)↓ |
| 4  | <b>Anemia</b>                                             | No | 1.01(0.99,1.03)  |
| 5  | <b>Asthma</b>                                             | No | 1.27(1.24,1.31)† |
| 6  | <b>Hyperlipidemia</b>                                     | No | 1.34(1.31,1.36)† |
| 7  | <b>Hyperplasia</b>                                        | No | 1.13(1.10,1.16)† |
| 8  | <b>Hypertension</b>                                       | No | 1.09(1.07,1.11)† |
| 9  | <b>Hypothyroidism</b>                                     | No | 1.08(1.06,1.10)† |
| 10 | <b>Anxiety Disorders</b>                                  | No | 0.98(0.96,1.01)  |
| 11 | <b>Bipolar Disorder</b>                                   | No | 1.02(0.95,1.08)  |
| 12 | <b>Major Depressive Affective Disorder</b>                | No | 1.06(1.02,1.10)† |
| 13 | <b>Schizophrenia and Other Psychotic Disorders</b>        | No | 0.67(0.61,0.74)↓ |
| 14 | <b>Epilepsy</b>                                           | No | 0.83(0.77,0.90)↓ |
| 15 | <b>Fibromyalgia, Chronic Pain and Fatigue</b>             | No | 1.39(1.36,1.42)† |
| 16 | <b>Viral Hepatitis (General)</b>                          | No | 1.04(0.96,1.13)  |
| 17 | <b>Liver Disease Cirrhosis And Other Liver Conditions</b> | No | 0.95(0.92,0.99)↓ |
| 18 | <b>Leukemias and Lymphomas</b>                            | No | 0.94(0.88,1.01)  |
| 19 | <b>Migraine and Other Chronic Headache</b>                | No | 1.28(1.23,1.33)† |
| 20 | <b>Mobility Impairments</b>                               | No | 0.70(0.65,0.76)↓ |
| 21 | <b>Obesity</b>                                            | No | 1.04(1.02,1.06)† |
| 22 | <b>Peripheral Vascular Disease</b>                        | No | 1.00(0.97,1.04)  |
| 23 | <b>Tobacco Use Disorders</b>                              | No | 0.82(0.80,0.85)↓ |
| 24 | <b>Pressure Ulcers and Chronic Ulcers</b>                 | No | 0.82(0.77,0.87)↓ |
| 25 | <b>Deafness and Hearing Impairment</b>                    | No | 1.21(1.17,1.25)† |

Hazard ratios and confidence intervals from the primary analysis for Covariates except for the study antibiotics (which are in Table 3)

Abbreviations: HR, hazard ratio, CI, confidence interval; FLQ, fluoroquinolone; CIP, ciprofloxacin; LVX, levofloxacin; MXF, moxifloxacin; AMX, Amoxicillin; AMC, Amoxicillin Clavulanate; AZT, Azithromycin; LEX, Cephalexin.

†= significantly high with P-value < 0.001, †= significantly high with  $0.001 \leq P\text{-value} < 0.05$

↓= significantly low with P-value < 0.001, ↓= significantly high with  $0.001 \leq P\text{-value} < 0.05$

Table 3. Hazard Ratios of Each Antibiotic by Anatomic Sites and Temporal Order of Drug Exposure

|                |                   | Any Tendon Rupture | Achilles Tendon Rupture | Complete Rupture of Rotator Cuff | Other Tendon Ruptures | Death (Competing risk) |
|----------------|-------------------|--------------------|-------------------------|----------------------------------|-----------------------|------------------------|
|                | Temporal Exposure | HR(95% CI)         | HR(95% CI)              | HR(95% CI)                       | HR(95% CI)            | HR(95% CI)             |
| AMX VS. NO AMX | ≤ 30 days         | 0.86(0.80,0.92) ↓  | 0.88(0.59,1.33)         | 0.88(0.82,0.95) ↓                | 0.79(0.67,0.93) ↓     | 0.66(0.61,0.71) ↓      |
|                | 31 – 60 days      | 0.94(0.87,1.01)    | 0.80(0.49,1.31)         | 0.91(0.84,0.99) ↓                | 1.08(0.93,1.27)       | 0.69(0.63,0.75) ↓      |
|                | ≥ 61 days         | 1.00(0.98,1.02)    | 0.99(0.86,1.13)         | 1.01(0.99,1.04)                  | 0.97(0.92,1.01)       | 0.77(0.75,0.78) ↓      |
| AMC VS. NO AMC | ≤ 30 days         | 0.93(0.85,1.02)    | 1.25(0.79,1.97)         | 0.87(0.79,0.97) ↓                | 1.17(0.98,1.41)       | 1.37(1.30,1.45) ↑      |
|                | 31 – 60 days      | 0.95(0.85,1.05)    | 1.37(0.82,2.29)         | 0.95(0.84,1.06)                  | 0.81(0.63,1.04)       | 1.26(1.17,1.35) ↑      |
|                | ≥ 61 days         | 1.07(1.04,1.09) ↑  | 0.95(0.81,1.12)         | 1.07(1.04,1.10) ↑                | 1.02(0.96,1.08)       | 0.86(0.84,0.88) ↓      |
| AZM VS. NO AZM | ≤ 30 days         | 0.99(0.93,1.06)    | 1.15(0.82,1.63)         | 1.00(0.93,1.08)                  | 0.87(0.75,1.01)       | 0.80(0.75,0.84) ↓      |
|                | 31 – 60 days      | 0.90(0.84,0.98) ↓  | 0.99(0.65,1.49)         | 0.91(0.84,0.99) ↓                | 0.95(0.81,1.11)       | 0.77(0.73,0.82) ↓      |
|                | ≥ 61 days         | 1.07(1.05,1.09) ↑  | 1.02(0.91,1.15)         | 1.09(1.07,1.12) ↑                | 0.99(0.95,1.04)       | 0.71(0.70,0.72) ↓      |
| LEX VS. NO LEX | ≤ 30 days         | 1.31(1.22,1.41) ↑  | 1.93(1.35,2.75) ↑       | 1.19(1.09,1.29) ↑                | 1.79(1.56,2.06) ↑     | 1.04(0.98,1.10)        |
|                | 31 – 60 days      | 1.05(0.95,1.15)    | 1.14(0.66,1.96)         | 1.06(0.96,1.18)                  | 1.02(0.82,1.26)       | 1.01(0.94,1.08)        |
|                | ≥ 61 days         | 1.08(1.05,1.11) ↑  | 1.00(0.85,1.16)         | 1.07(1.05,1.10) ↑                | 1.15(1.09,1.21) ↑     | 0.86(0.84,0.88) ↓      |
| LVX VS. NO LVX | ≤ 30 days         | 1.14(1.05,1.25) ↑  | 2.20(1.50,3.24) ↑       | 1.16(1.06,1.28) ↑                | 0.96(0.78,1.19)       | 2.19(2.11,2.28) ↑      |
|                | 31 – 60 days      | 1.09(0.98,1.21)    | 1.91(1.17,3.10) ↑       | 1.09(0.97,1.22)                  | 1.14(0.90,1.43)       | 1.80(1.71,1.89) ↑      |
|                | ≥ 61 days         | 1.02(1.00,1.05)    | 1.22(1.03,1.43) ↑       | 1.03(1.00,1.07) ↑                | 0.97(0.91,1.03)       | 0.99(0.97,1.01)        |
| CIP VS. NO CIP | ≤ 30 days         | 0.96(0.89,1.03)    | 1.06(0.70,1.60)         | 0.96(0.88,1.04)                  | 0.84(0.71,1.00) ↓     | 1.46(1.40,1.53) ↑      |
|                | 31 – 60 days      | 0.92(0.85,1.01)    | 1.02(0.63,1.67)         | 0.91(0.82,1.00) ↓                | 0.95(0.78,1.14)       | 1.31(1.24,1.38) ↑      |
|                | ≥ 61 days         | 0.96(0.94,0.98) ↓  | 1.16(1.02,1.32) ↑       | 0.96(0.94,0.99) ↓                | 0.92(0.88,0.97) ↓     | 0.86(0.84,0.88) ↓      |
| MXF VS. NO MXF | ≤ 30 days         | 0.59(0.37,0.93)    | 0.97(0.15,6.24)         | 0.52(0.30,0.91) ↓                | 0.76(0.33,1.77)       | 2.05(1.78,2.35) ↑      |
|                | 31 – 60 days      | 0.71(0.43,1.15)    | 0.00(0.00,0.00)         | 0.63(0.35,1.13)                  | 0.93(0.39,2.25)       | 1.43(1.18,1.72) ↑      |
|                | ≥ 61 days         | 0.99(0.93,1.06)    | 1.02(0.69,1.51)         | 0.99(0.92,1.06)                  | 1.10(0.95,1.27)       | 0.89(0.86,0.93) ↓      |
| FLQ VS. AMX    | ≤ 30 days         | 1.00(0.84,1.19)    | 1.49(0.69,3.19)         | 0.94(0.77,1.16)                  | 1.08(0.77,1.50)       | 2.86(2.61,3.13) ↑      |
|                | 31 – 60 days      | 0.95(0.79,1.15)    | 0.07(0.04,0.12) ↓       | 0.94(0.75,1.17)                  | 0.92(0.65,1.31)       | 2.18(1.96,2.44) ↑      |
|                | ≥ 61 days         | 0.99(0.96,1.02)    | 1.14(0.94,1.40)         | 0.98(0.95,1.02)                  | 1.03(0.96,1.11)       | 1.19(1.16,1.22) ↑      |
| FLQ VS. AZM    | ≤ 30 days         | 0.87(0.73,1.03)    | 1.14(0.54,2.39)         | 0.83(0.68,1.02)                  | 0.98(0.70,1.37)       | 2.35(2.18,2.53) ↑      |
|                | 31 – 60 days      | 0.99(0.82,1.19)    | 0.06(0.04,0.09) ↓       | 0.93(0.75,1.16)                  | 1.06(0.75,1.49)       | 1.94(1.77,2.13) ↑      |
|                | ≥ 61 days         | 0.93(0.90,0.96) ↓  | 1.10(0.91,1.34)         | 0.91(0.88,0.94) ↓                | 1.00(0.93,1.08)       | 1.29(1.25,1.32) ↑      |
| FLQ VS. LEX    | ≤ 30 days         | 0.66(0.55,0.78) ↓  | 0.68(0.32,1.42)         | 0.70(0.57,0.87) ↓                | 0.47(0.34,0.66) ↓     | 1.80(1.67,1.95) ↑      |
|                | 31 – 60 days      | 0.85(0.70,1.04)    | 0.05(0.03,0.09) ↓       | 0.80(0.64,1.01)                  | 0.99(0.68,1.44)       | 1.48(1.34,1.64) ↑      |
|                | ≥ 61 days         | 0.92(0.89,0.95) ↓  | 1.13(0.92,1.40)         | 0.92(0.89,0.96) ↓                | 0.86(0.80,0.93) ↓     | 1.06(1.03,1.09) ↑      |
| FLQ VS. AMC    | ≤ 30 days         | 0.93(0.77,1.11)    | 1.05(0.48,2.32)         | 0.96(0.77,1.19)                  | 0.72(0.51,1.02)       | 1.37(1.27,1.48) ↑      |

|                     |                  |                  |                  |                 |                  |
|---------------------|------------------|------------------|------------------|-----------------|------------------|
| <b>31 – 60 days</b> | 0.94(0.77,1.15)  | 0.04(0.02,0.07)↓ | 0.90(0.72,1.14)  | 1.24(0.83,1.86) | 1.19(1.08,1.31)↑ |
| <b>≥ 61 days</b>    | 0.93(0.90,0.97)↓ | 1.19(0.95,1.49)  | 0.93(0.89,0.96)↓ | 0.98(0.90,1.06) | 1.06(1.03,1.09)↑ |

Abbreviations: HR, hazard ratio; CI, confidence interval; FLQ, fluoroquinolone; CIP, ciprofloxacin; LVX, levofloxacin; MXF, moxifloxacin; AMX, Amoxicillin; AMC, Amoxicillin Clavulanate; AZT, Azithromycin; LEX, Cephalexin.

↑= significantly high with P-value < 0.001, ↑= significantly high with 0.001 ≤ P-value < 0.05

↓= significantly low with P-value < 0.001, ↓= significantly high with 0.001 ≤ P-value < 0.05

For peer review only



Table 4. Pairwise Comparisons

| Comparison                                                                                                 | Temporal Exposure | Any Tendon Rupture | Achilles Tendon Rupture | Complete Rupture of Rotator Cuff | Other Tendon Rupture | Death (Competing risk) |
|------------------------------------------------------------------------------------------------------------|-------------------|--------------------|-------------------------|----------------------------------|----------------------|------------------------|
|                                                                                                            |                   | HR(95% CI)         | HR(95% CI)              | HR(95% CI)                       | HR(95% CI)           | HR(95% CI)             |
| <b>HRs comparing use of each FQ with use of each non-FQ antibiotics in a ≤30-day window</b>                |                   |                    |                         |                                  |                      |                        |
| CIP VS. LVX                                                                                                | ≤ 30 days         | 0.84(0.75,0.94)↓   | 0.48(0.27,0.86) ↓       | 0.82(0.73,0.94) ↓                | 0.87(0.67,1.15)      | 0.67(0.63,0.71)↓       |
| CIP VS. MXF                                                                                                | ≤ 30 days         | 1.63(1.02,2.61)↑   | 1.08(0.16,7.29)         | 1.84(1.05,3.24)↑                 | 1.10(0.47,2.60)      | 0.72(0.62,0.83)↓       |
| LVX VS. MXF                                                                                                | ≤ 30 days         | 1.95(1.21,3.13)↑   | 2.26(0.34,15.17)        | 2.24(1.27,3.94)↑                 | 1.26(0.53,3.01)      | 1.07(0.93,1.24)        |
| CIP VS. AMX                                                                                                | ≤ 30 days         | 1.11(1.01,1.23)↑   | 1.20(0.66,2.16)         | 1.09(0.97,1.21)                  | 1.06(0.84,1.34)      | 2.23(2.05,2.44)†       |
| CIP VS. AZM                                                                                                | ≤ 30 days         | 0.97(0.87,1.06)    | 0.91(0.53,1.57)         | 0.96(0.86,1.07)                  | 0.96(0.77,1.21)      | 1.84(1.71,1.97)†       |
| CIP VS. LEX                                                                                                | ≤ 30 days         | 0.73(0.66,0.81)↓   | 0.55(0.31,0.95) ↓       | 0.81(0.72,0.91)↓                 | 0.47(0.37,0.59)†     | 1.41(1.31,1.52)†       |
| CIP VS. AMC                                                                                                | ≤ 30 days         | 1.03(0.91,1.16)    | 0.84(0.46,1.56)         | 1.10(0.96,1.25)                  | 0.71(0.56,0.92)↓     | 1.07(1.00,1.15)        |
| LVX VS. AMX                                                                                                | ≤ 30 days         | 1.33(1.19,1.49)†   | 2.50(1.45,4.29)↑        | 1.32(1.16,1.49)†                 | 1.22(0.93,1.59)      | 3.34(3.07,3.64)†       |
| LVX VS. AZM                                                                                                | ≤ 30 days         | 1.15(1.03,1.29)↑   | 1.91(1.13,3.23)↑        | 1.16(1.03,1.31)↑                 | 1.10(0.84,1.44)      | 2.75(2.57,2.95)†       |
| LVX VS. LEX                                                                                                | ≤ 30 days         | 0.87(0.78,0.98) ↓  | 1.14(0.68,1.92)         | 0.98(0.86,1.12)                  | 0.54(0.41,0.69)†     | 2.11(1.97,2.27)†       |
| LVX VS. AMC                                                                                                | ≤ 30 days         | 1.23(1.08,1.40)↑   | 1.76(0.98,3.15)         | 1.33(1.15,1.54)†                 | 0.82(0.62,1.08)      | 1.60(1.49,1.72)†       |
| MXF VS. AMX                                                                                                | ≤ 30 days         | 0.68(0.43,1.09)    | 1.10(0.16,7.41)         | 0.59(0.34,1.03)                  | 0.96(0.41,2.27)      | 3.12(2.67,3.65)†       |
| MXF VS. AZM                                                                                                | ≤ 30 days         | 0.59(0.37,0.94) ↓  | 0.84(0.13,5.65)         | 0.52(0.30,0.91)↓                 | 0.88(0.37,2.07)      | 2.57(2.21,2.98)†       |
| MXF VS. LEX                                                                                                | ≤ 30 days         | 0.45(0.28,0.72) ↓  | 0.50(0.08,3.35)         | 0.44(0.25,0.77)↓                 | 0.43(0.18,1.00)      | 1.97(1.70,2.29)†       |
| MXF VS. AMC                                                                                                | ≤ 30 days         | 0.63(0.39,1.01)    | 0.78(0.11,5.33)         | 0.60(0.34,1.05)                  | 0.65(0.28,1.53)      | 1.50(1.29,1.73)†       |
| <b>HRs comparing use of FQ as a class with use of each non-FQ antibiotics across different time window</b> |                   |                    |                         |                                  |                      |                        |
| FLQ VS. AMX                                                                                                | Overall           | 0.98(0.90,1.07)    | 0.49(0.36,0.68)         | 0.95(0.86,1.06)                  | 1.01(0.86,1.19)      | 1.95(1.86,2.05)†       |
| FLQ VS. AZM                                                                                                | Overall           | 0.93(0.85,1.01)    | 0.42(0.30,0.57)         | 0.89(0.80,0.98)↓                 | 1.01(0.86,1.19)      | 1.80(1.73,1.88)†       |
| FLQ VS. LEX                                                                                                | Overall           | 0.80(0.73,0.88)    | 0.34(0.24,0.47)         | 0.80(0.72,0.89)                  | 0.74(0.62,0.88)      | 1.42(1.35,1.48)†       |
| FLQ VS. AMC                                                                                                | Overall           | 0.93(0.85,1.02)    | 0.37(0.26,0.52)         | 0.93(0.83,1.03)                  | 0.96(0.80,1.15)      | 1.20(1.15,1.25)†       |

Abbreviations: HR, hazard ratio; CI, confidence interval; FLQ, fluoroquinolone; CIP, ciprofloxacin; LVX, levofloxacin; MXF, moxifloxacin; AMX, Amoxicillin; AMC, Amoxicillin Clavulanate; AZT, Azithromycin; LEX, Cephalexin.

†= significantly high with P-value < 0.001, †= significantly high with 0.001 ≤ P-value < 0.05

‡= significantly low with P-value < 0.001, ‡= significantly high with 0.001 ≤ P-value < 0.05

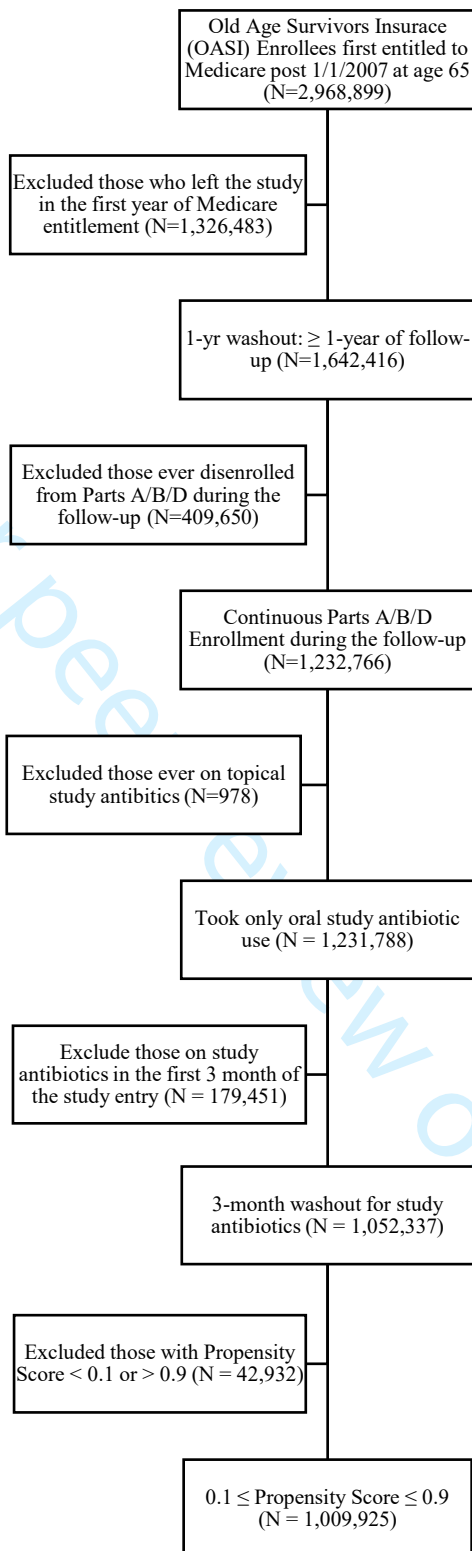

Supplementary Figure. Secular Trend of Study Antibiotic Use



X-axis: Calendar year.

Y-axis: % of patients on each drug class.

STROBE Statement—Checklist of items that should be included in reports of *case-control studies*

|                              | Item No | Recommendation                                                                                                                                                                                    | Page No |
|------------------------------|---------|---------------------------------------------------------------------------------------------------------------------------------------------------------------------------------------------------|---------|
| <b>Title and abstract</b>    | 1       | (a) Indicate the study's design with a commonly used term in the title or the abstract                                                                                                            | 1       |
|                              |         | (b) Provide in the abstract an informative and balanced summary of what was done and what was found                                                                                               | 2       |
| <b>Introduction</b>          |         |                                                                                                                                                                                                   |         |
| Background/rationale         | 2       | Explain the scientific background and rationale for the investigation being reported                                                                                                              | 5       |
| Objectives                   | 3       | State specific objectives, including any prespecified hypotheses                                                                                                                                  | 5       |
| <b>Methods</b>               |         |                                                                                                                                                                                                   |         |
| Study design                 | 4       | Present key elements of study design early in the paper                                                                                                                                           | 6       |
| Setting                      | 5       | Describe the setting, locations, and relevant dates, including periods of recruitment, exposure, follow-up, and data collection                                                                   | 6       |
| Participants                 | 6       | (a) Give the eligibility criteria, and the sources and methods of case ascertainment and control selection. Give the rationale for the choice of cases and controls                               | 6       |
|                              |         | (b) For matched studies, give matching criteria and the number of controls per case                                                                                                               |         |
| Variables                    | 7       | Clearly define all outcomes, exposures, predictors, potential confounders, and effect modifiers. Give diagnostic criteria, if applicable                                                          | 7       |
| Data sources/<br>measurement | 8*      | For each variable of interest, give sources of data and details of methods of assessment (measurement). Describe comparability of assessment methods if there is more than one group              | 7       |
| Bias                         | 9       | Describe any efforts to address potential sources of bias                                                                                                                                         | 8-9     |
| Study size                   | 10      | Explain how the study size was arrived at                                                                                                                                                         | 6       |
| Quantitative variables       | 11      | Explain how quantitative variables were handled in the analyses. If applicable, describe which groupings were chosen and why                                                                      | 8       |
| Statistical methods          | 12      | (a) Describe all statistical methods, including those used to control for confounding                                                                                                             | 7-9     |
|                              |         | (b) Describe any methods used to examine subgroups and interactions                                                                                                                               | n/a     |
|                              |         | (c) Explain how missing data were addressed                                                                                                                                                       | n/a     |
|                              |         | (d) If applicable, explain how matching of cases and controls was addressed                                                                                                                       | n/a     |
|                              |         | (e) Describe any sensitivity analyses                                                                                                                                                             | n/a     |
| <b>Results</b>               |         |                                                                                                                                                                                                   |         |
| Participants                 | 13*     | (a) Report numbers of individuals at each stage of study—eg numbers potentially eligible, examined for eligibility, confirmed eligible, included in the study, completing follow-up, and analysed | 9       |
|                              |         | (b) Give reasons for non-participation at each stage                                                                                                                                              | 9       |
|                              |         | (c) Consider use of a flow diagram                                                                                                                                                                | 9       |
| Descriptive data             | 14*     | (a) Give characteristics of study participants (eg demographic, clinical, social) and information on exposures and potential confounders                                                          | 9-10    |
|                              |         | (b) Indicate number of participants with missing data for each variable of interest                                                                                                               | n/a     |
| Outcome data                 | 15*     | Report numbers in each exposure category, or summary measures of exposure                                                                                                                         | 10      |
