# Supplementary material for: Association between tendon ruptures and use of fluoroquinolone, and other oral antibiotics: a 10-year retrospective study of 1 million US senior Medicare beneficiaries
Source: PubMed Central journal article supplement — BMJ Open. 2020 Dec 21;10(12):e034844. doi: 10.1136/bmjopen-2019-034844 (PMC7754651; doi:10.1136/bmjopen-2019-034844), 2020-12-21
Supplement: bmjopen-2019-034844supp001.pdf [file bmjopen-2019-034844supp001.pdf]

## Open access

## Original research

# BMJ Open Association between tendon ruptures and use of fluoroquinolone, and other oral antibiotics: a 10-year retrospective study of 1 million US senior Medicare beneficiaries

Seo Baik , Jason Lau, Vojtech Huser, Clement J McDonald

**To cite:** Baik S, Lau J, Huser V, *et al.* Association between tendon ruptures and use of fluoroquinolone, and other oral antibiotics: a 10-year retrospective study of 1 million US senior Medicare beneficiaries. *BMJ Open* 2020;**0**:e034844. doi:10.1136/bmjopen-2019-034844

► Prepublication history and additional materials for this paper is available online. To view these files, please visit the journal online (<http://dx.doi.org/10.1136/bmjopen-2019-034844>).

Received 08 October 2019  
Revised 30 October 2020  
Accepted 04 November 2020

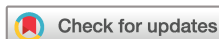

© Author(s) (or their employer(s)) 2020. Re-use permitted under CC BY-NC. No commercial re-use. See rights and permissions. Published by BMJ.

Lister Hill National Center for Biomedical Communications, National Library of Medicine, Bethesda, Maryland, USA

**Correspondence to**  
Dr Clement J McDonald;  
[ClemMcDonald@mail.nih.gov](mailto:ClemMcDonald@mail.nih.gov)

## ABSTRACT

**Objectives** To assess the association of fluoroquinolone use with tendon ruptures compared with no fluoroquinolone and that of the four most commonly prescribed non-fluoroquinolone antibiotics in the USA.

**Design** Retrospective observational study.

**Setting** US seniors enrolled in the federal old-age, survivor's insurance programme.

**Participants** 1 009 925 Medicare fee-for-service beneficiaries and their inpatient, outpatient, prescription drug records were used.

**Interventions** Seven oral antibiotics, fluoroquinolones (ciprofloxacin, levofloxacin, moxifloxacin) and amoxicillin, amoxicillin-clavulanate, azithromycin and cephalixin.

**Primary and secondary outcome measures** All tendon ruptures combined, and three types of tendon ruptures by anatomic site, Achilles tendon rupture, rupture of rotator cuff and other tendon ruptures occurred in 2007–2016.

**Results** Of three fluoroquinolones, only levofloxacin exhibited a significant increased risk of tendon ruptures—16% (HR=1.16; 95% CI 1.06 to 1.28), and 120% (HR=2.20; 95% CI 1.50 to 3.24) for rotator cuff and Achilles tendon rupture, respectively, in the ≤30 days window. Ciprofloxacin (HR=0.96; 95% CI 0.89 to 1.03) and moxifloxacin (HR=0.59; 95% CI 0.37 to 0.93) exhibited no increased risk of tendon ruptures combined.

Among the non-fluoroquinolone antibiotics, cephalixin exhibited *increased* risk of combined tendon ruptures (HR=1.31; 95% CI 1.22 to 1.41) and modest to large risks across all anatomic rupture sites (HRs 1.19–1.93) at ≤30 days window. Notably, the risk of levofloxacin never exceeded the risk of the non-fluoroquinolone, cephalixin in any comparison.

**Conclusions** In our study, fluoroquinolones as a class were not associated with the increased risk of tendon ruptures. Neither ciprofloxacin nor moxifloxacin exhibited any risk for tendon ruptures. Levofloxacin did exhibit significant increased risk. Cephalixin with no reported effect on metalloprotease activity had an equal or greater risk than levofloxacin; so we question whether metalloprotease activity has any relevance to observed associations with tendon rupture. Confounding by indication bias may be more relevant and should be given more consideration as explanation for significant associations in observational studies of tendon rupture.

## Strengths and limitations of this study

- We conducted a large (more than 1 million US senior subjects) retrospective study of outpatient prescription drug records to assess the association between the use of fluoroquinolones and the occurrence of tendon ruptures compared with the most commonly used non-fluoroquinolone oral antibiotics.
- Our study included all oral fluoroquinolones (ciprofloxacin, levofloxacin, moxifloxacin) prescribed in the USA and the four most commonly prescribed non-fluoroquinolone antibiotics: amoxicillin, amoxicillin-clavulanate, azithromycin and cephalixin as controls.
- In addition to reporting the risk of any tendon rupture, we also reported the risk of three types of tendon ruptures by anatomic site (1) Achilles tendon rupture, (2) rupture of rotator cuff and (3) tendon ruptures on other anatomic sites as separate outcomes.
- This study is possibly only applicable to US senior, aged 65 or more, Medicare fee-for-service beneficiaries.
- We had no options to verify claims diagnoses via chart review.

## INTRODUCTION

Fluoroquinolones (FQ) are among the most widely prescribed antibiotics in the outpatient setting<sup>1 2</sup> due to their broad spectrum treatment of bacteria found in respiratory, urinary, joint, and skin infections. Several observational studies have reported the association between the use of FQs and tendinitis and tendon rupture (TR), especially of the Achilles tendon<sup>3–12</sup> and the US Food and Drug Administration (FDA) issued black box warnings to FQ antibiotics beginning in 2008.<sup>13</sup> The warning was updated in 2016 to recommend using alternative antibiotics when possible.<sup>14 15</sup> The fact that FQs upregulate the production of metalloproteinase

## Open access

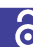

enzymes with collagenase activity that could weaken tendons is taken as a mechanism to explain this reported risk.<sup>16–18</sup>

Studies that reported association between FQ use and TR used one or more other antibiotics as controls. One study compared the FQ rupture rates with patients using azithromycin (AZT), the most frequently used oral antibiotic in the USA. Only two focused principally on TR risk among the elderly. None compared TR rates of FQs with those of cephalexin (LEX)—the third most commonly prescribed oral antibiotic in the USA.

The Virtual Research Data Center (VRDC) of Center for Medicare and Medicaid Services (CMS)<sup>19</sup> carries more than 10 years of Medicare claims, which include information about the usage of prescription drugs and encounter diagnoses (including TRs). It also carries information about 42 major chronic conditions, demographic characteristic and vital status. We conducted a large observational study using the VRDC to assess the association of FQ antibiotics with TR compared with that of the four most commonly prescribed non-FQ antibiotics in the USA. Here, we report the results of that analysis.

## METHODS

### Patient and public involvement

Neither patients nor the public were not involved in the design of the study.

### Study population

We derived our study population from a 20% random sample of Medicare prescription drug coverage (part D) enrollees who first enrolled in the Medicare under old age and survivors insurance within a month of age 65 (779–781 month old) and on or after 1 January 2007, the first full year of part D prescriptions availability. We included claim data through 31 December 2016, the end of VRDC claim data available to us. All of the VRDC data are deidentified and researchers must perform all of their analysis within the VRDC computer systems, and can only pull statistical results from it.<sup>19</sup> This study was declared not human subject research by the Office of Human Research Protection at the National Institutes of Health and by the CMS's Privacy Board.

We required subjects to be continuously enrolled in hospital insurance (part A) and medical insurance (part B) to assure we had full outpatient and inpatient claims data, which are not available for nearly 20% of subjects with part D only.<sup>20</sup> To obtain a cohort of patients with new TR, we excluded individuals with TRs recorded in the first year of their Medicare entitlement.<sup>21</sup> In order to assure sufficient follow-up, we excluded individuals with less than 1-year follow-up. Moreover, to obtain incident (or new) drug user cohort, we excluded individuals who were prescribed any study antibiotics during their first 3 months after part D enrolment, while ignoring the data during the same time window for individuals not taking

study antibiotics. By doing so, we minimise survivor bias from prevalent users (figure 1).

### Primary outcome

We identified patients with TR based on International Classification of Diseases (ICD)-9-CM codes of 726.13, 727.60–727.69, and ICD-10-CM codes of M66.2, M66.3, M66.8, M66.9 and M75.1. We combined all TRs and reported them as one outcome, and report three types of TRs by anatomic site (1) Achilles TR, (2) rupture of rotator cuff and (3) TRs on other anatomic sites as separate outcomes. We focused on Achilles TR because it was the sole focus of many prior studies and on rotator cuff TR because it is the predominant TR of the elderly. We lumped the remaining as 'other TRs'.

### Study antibiotics

We included a total of seven study antibiotics prescribed in the USA including all three oral FQs (moxifloxacin (MXF), ciprofloxacin (CIP), levofloxacin (LVX), the active stereoisomer of ofloxacin, and the four most frequently prescribed non-FQ oral antibiotics (amoxi-cillin (AMX), amoxicillin clavulanate (AMC), AZT and LEX) as controls. CIP and the four non-FQ study anti-biotics were the five most frequently used US oral anti-biotics in 2011.

### Statistical analysis

We analysed each of the four TR outcomes in separate Fine-Gray competing risk regression analyses with death as the competing risk.<sup>22 23</sup> Individuals became eligible for 'the study' at their Medicare enrolment but prescription data did not become available until their part D enrolment. We followed them from their entry in part D (while accounting for left truncation<sup>24</sup>) until their first diagnosis of TR, death, switch to a capitated plan, disenrolment from Medicare or 31 December 2016—whichever came first. In each regression analysis, we included the seven antibiotics whose effects on TR were our primary interest. We adjusted HR of each study antibiotic for concurrent use of the other study antibiotics. We also adjusted for calendar year of individual's part D entry, to account for secular trends, and their sociodemographic characteristics of gender, race, rural residency (yes/no) and income status. We inferred individual's income level from the monthly indicators of dual eligibility and Low Income Subsidy (LIS) status, which separate subjects into three groups; (1) dual whose income is below 135% Federal Poverty Line (FPL); (2) non-dual LIS whose income is between 135% and 150% FPL; and (3) non-dual no LIS whose income is above 150% FPL, respectively. We used this variable in the analysis as a surrogate for economic status.<sup>25</sup> We also included the 42 chronic conditions within the Medicare Master Beneficiary Summary File<sup>26</sup> that had >1% prevalence as measures of overall health. We assumed that patients were on a given study drug from the prescription dispensing date to the end of days of supply. We did not distinguish between different brands of

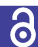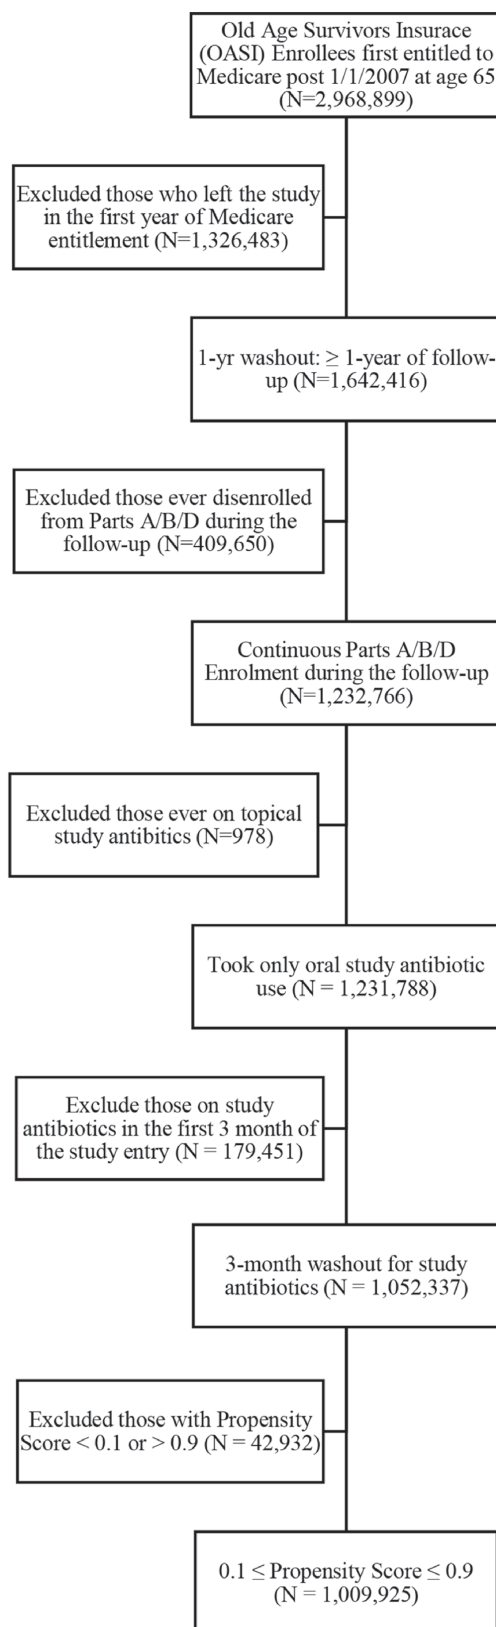

**Figure 1** Consolidated Standards of Reporting Trials diagram.

## Open access

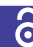

a study drugs. Following the approach of prior studies,<sup>3–5</sup> we separated subjects by temporal exposure within each study drug, including groups for never exposed, exposed within 30 days, 31–60 days, and >60 days of the index (or TR event) time. Thus, by this approach, we could detect the presumed short-term action of the FQ's on tendons and avoid the risk of non-differential misclassification that can occur with too simple (yes/no) drug exposure measures.<sup>27</sup> In order to minimise the immortal time bias, we treated all drug usage measures and all sociodemographic characteristics, except gender, race and rural residency, as time-varying covariates.<sup>28 29</sup> In order to mitigate selection bias towards use of any study antibiotics, we employed a propensity score (PS) approach.<sup>30 31</sup> We first derived a PS of taking any of study antibiotics as a function of individual's characteristics at the time of the first antibiotic use after part D entry from a multiple logistic regression. We used the median days to the first study antibiotic use in patients taking study antibiotics as the cut-off time for individuals not taking study antibiotics. We performed our analyses with an inverse propensity score weight (IPSW) excluding individuals with the PS below 0.1 and above 0.9, to mitigate poorer performance in the presence of a strong treatment-selection process.<sup>32</sup> In post-hoc analyses, we also compared the risk of TR of each study antibiotics to that of every other study antibiotic on a pairwise basis.

## RESULTS

## Study population and secular trend

From our 20% sample of part D enrollees, 1 009 925 individuals satisfied all our selection criteria including the washout of individuals with any antibiotic use in their first 3 months of part D enrolment (figure 1). Follow-up began with an individual's enrolment in part D programme (median (IQR) 0 (0–122) days from the Medicare entitlement). We followed them for a median of 3.6 years (total 4 030 897 patient years) until their first diagnosis of TR (3.5%), death (4.6%), switch to a capitated plan (12.6%), disenrolment from Medicare (<1%) or study end on 31 December 2016 (79.3%), whichever came first. Patients had their first post enrolment claim with a diagnosis of TR at a median age of 68.5 (IQR 67.2–70.4). The proportions of non-Hispanic white, female and rural residents were 80.7%, 57.0% and 22.6% respectively. About a fifth of individuals received federal/state subsidies, that is, Medicaid coverage on top of Medicare (dual 16.1%) or assistance in paying their part D premium and coinsurance/copayment (non-dual LIS 2.7%). Among the 42 Medicare chronic conditions, hypertension (67.3%), hyperlipidaemia (68.4%), cataract (46.4%), rheumatoid arthritis/osteoarthritis (36.6%), anaemia (30.4%), ischaemic heart disease (26.2%) and chronic kidney disease (17.9%) were the seven most prevalent (table 1).

Of the 3 286 54 (33.0%) patients who ever took an FQ, 71.5%, 47.5% and 4.5% had taken CIP, LVX and MXF, respectively. Of 5 768 85 (57.1%) of patients who ever

took a non-FQ antibiotic, the figures were 53.6%, 44.9%, 33.9% and 31.1% for AZM, AMX, LEX and AMC, respectively. Patients who took one or more study antibiotics took a median (IQR) of 3.0 (1.0–6.0) study antibiotic prescriptions and took a median (IQR) 2.0 (1.0–3.0) different study antibiotics during the observation period. About 2.5% patients who took one or more study antibiotics took one or more such antibiotics at the same time.

Secular trends in study antibiotics usage existed (see online supplemental figure 1). MXF usage declined precipitously from 5.0% in 2007 to almost zero in 2016—overweighting the MXF statistics for early entrants into Medicare and yielding a longer mean follow-up time. CIP use hit a peak, and LVX, a nadir, in 2011. The use of AMX, AMC and LEX trended slowly upward (see online supplemental figure 1). The mode (median) of supply durations for each antibiotics was short—10 (7) for AMX, 10 (10) for AMC, 5 (5) for AZM, 10 (7) for LEX, 7 (7) for CIP, 10 (7) for LVX, 10 (11) for MXF. About 35% of individuals were never exposed to any of the study antibiotics during the study period.

Unadjusted figures for TR prevalence across each of the seven study antibiotic users and the no study antibiotic users ranged from a high of 5.2% for MXF to a low of 2.9% for no antibiotic (table 1). Except for MXF, the unadjusted prevalence of TRs associated with each non-FQ antibiotic was *greater than* or equal to that of each FQ antibiotic. The TR rates per 1000 patient years followed the same pattern, with the non-FQ antibiotics topping the rates of all FQs except MXF (with the highest rate), possibly due to overweighting of MXF usage in the early years of the study. Patients who ever took an FQ had the highest unadjusted rate of death per 1000 person years. LVX's death rate was nearly twice the rate of each non-FQ antibiotics. The size of the associations with conditions like diabetes, chronic renal failure and heart failure paralleled the magnitude of the death rates and was generally higher with FQs than non-FQ antibiotics (table 1).

## Primary analysis

Table 2 presents HRs for all non-antibiotic covariates in our Fine-Gray competing risk regression with IPSW. For simplicity sake, in table 2, we report the HRs of all anatomic types of TRs taken together. Being a female (vs male), African-American, Hispanic, and Asian (vs white), being dual or non-dual LIS (vs non-dual no LIS) and living in a rural area were all associated with a *reduced* risk of TR. These risk reductions were 24% or more for all but Hispanics and rural residency covariates, and the reductions were similar across all anatomic sites. In general, life-threatening chronic conditions, such as Acute Myocardial Infarction (AMI), Chronic Obstructive Pulmonary Disease (COPD), heart failure and colorectal/lung/endometrial cancers were associated with a lower risk of TR in a range of 15%–60% below control possibly due to constrained physical activity and/or shortened life span. Notably, diabetes and chronic renal disease, previously reported as risk factors for TR,<sup>33 34</sup> exhibited no

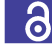

Open access

Table 1 Outcome, medical/medication use, diseases and patient characteristics by type of antibiotics

| Variable                                 | Overall          | FLQ              | CIP              | LVX              | MXF              | AMX              | AZM              | LEX              | AMC              | None            |
|------------------------------------------|------------------|------------------|------------------|------------------|------------------|------------------|------------------|------------------|------------------|-----------------|
| N                                        | 1 009 925        | 328 654          | 234 994          | 155 991          | 14 728           | 259 125          | 308 985          | 195 731          | 179 616          | 356 364         |
| Tendon rupture                           | 34 880 (3.5)     | 12 517 (3.8)     | 8811 (3.7)       | 5904 (3.8)       | 770 (5.2)        | 9636 (3.7)       | 12 448 (4.0)     | 8019 (4.1)       | 6622 (3.7)       | 10 169 (2.9)    |
| Death                                    | 46 468 (4.6)     | 23 249 (7.1)     | 14 821 (6.3)     | 14 610 (9.4)     | 2136 (14.5)      | 9632 (3.7)       | 14 608 (4.7)     | 11 394 (5.8)     | 9951 (5.5)       | 13 645 (3.8)    |
| Censored at HMO entry                    | 127 162 (12.6)   | 27 573 (8.4)     | 19 847 (8.4)     | 11 142 (7.1)     | 1571 (10.7)      | 21 215 (8.2)     | 26 140 (8.5)     | 14 887 (7.6)     | 12 674 (7.1)     | 65 886 (18.5)   |
| Censored at disenrolment                 | 145 (0.0)        | 25 (0.0)         | 13 (0.0)         | 13 (0.0)         | 2 (0.0)          | 19 (0.0)         | 27 (0.0)         | 23 (0.0)         | 16 (0.0)         | 85 (0.0)        |
| Censored at 31 December 2016             | 801 270 (79.3)   | 265 290 (80.7)   | 191 502 (81.5)   | 124 322 (79.7)   | 10 249 (69.6)    | 218 623 (84.4)   | 255 762 (82.8)   | 161 408 (82.5)   | 150 353 (83.7)   | 266 579 (74.8)  |
| Years of follow-up, median (total)       | 3.6 (4 030 897)  | 4.6 (1 620 894)  | 4.8 (1 190 308)  | 4.8 (789 849)    | 6.0 (87 397)     | 4.5 (1 274 357)  | 4.6 (1 529 370)  | 4.8 (1 000 459)  | 4.6 (890 340)    | 2.5 (1 067 731) |
| Tendon rupture, 1000 person years        | 8.65             | 7.72             | 7.40             | 7.47             | 8.81             | 7.56             | 8.14             | 8.02             | 7.44             | 9.52            |
| Death, 1000 person years                 | 11.53            | 14.34            | 12.45            | 18.50            | 24.44            | 7.56             | 9.55             | 11.39            | 11.18            | 12.78           |
| Female                                   | 575 885 (57.0)   | 197 915 (60.2)   | 146 745 (62.4)   | 89 682 (57.5)    | 8747 (59.4)      | 151 383 (58.4)   | 194 101 (62.8)   | 113 308 (57.9)   | 104 749 (58.3)   | 191 069 (53.6)  |
| White                                    | 814 933 (80.7)   | 274 785 (83.6)   | 196 048 (83.4)   | 131 725 (84.4)   | 12 484 (84.6)    | 215 101 (83.0)   | 259 657 (84.0)   | 167 825 (85.7)   | 153 723 (85.6)   | 271 906 (76.3)  |
| Black                                    | 75 930 (7.5)     | 20 017 (6.1)     | 14 286 (6.1)     | 8893 (5.7)       | 956 (6.5)        | 15 622 (6.0)     | 17 296 (5.6)     | 9625 (4.9)       | 9199 (5.1)       | 35 023 (9.8)    |
| Hispanic                                 | 56 582 (5.6)     | 17 044 (5.2)     | 12 607 (5.4)     | 7943 (5.1)       | 628 (4.3)        | 12 494 (4.8)     | 14 805 (4.8)     | 8976 (4.6)       | 7802 (4.3)       | 24 391 (6.8)    |
| Asian                                    | 26 336 (2.6)     | 7316 (2.2)       | 5362 (2.3)       | 3144 (2.0)       | 356 (2.4)        | 7624 (2.9)       | 7945 (2.6)       | 3539 (1.8)       | 3440 (1.9)       | 10 437 (2.9)    |
| Other                                    | 36 144 (3.6)     | 9492 (2.9)       | 6691 (2.8)       | 4286 (2.7)       | 324 (2.2)        | 8284 (3.2)       | 9282 (3.0)       | 5766 (2.9)       | 5452 (3.0)       | 14 607 (4.1)    |
| Ever dual                                | 162 988 (16.1)   | 54 055 (16.4)    | 38 277 (16.3)    | 28 156 (18.0)    | 2908 (19.7)      | 35 305 (13.6)    | 44 940 (14.5)    | 30 962 (15.8)    | 25 255 (14.1)    | 66 986 (18.8)   |
| Non-dual LIS                             | 26 955 (2.7)     | 7648 (2.3)       | 5459 (2.3)       | 3746 (2.4)       | 385 (2.6)        | 5224 (2.0)       | 6828 (2.2)       | 4191 (2.1)       | 3818 (2.1)       | 12 595 (3.5)    |
| Non-dual No LIS                          | 819 982 (81.2)   | 266 951 (81.2)   | 191 258 (81.4)   | 124 089 (79.5)   | 11 435 (77.6)    | 218 596 (84.4)   | 257 217 (83.2)   | 160 578 (82.0)   | 150 543 (83.8)   | 276 783 (77.7)  |
| Living in rural area                     | 228 199 (22.6)   | 78 581 (23.9)    | 56 385 (24.0)    | 38 847 (24.9)    | 2801 (19.0)      | 58 805 (22.7)    | 72 282 (23.4)    | 49 977 (25.5)    | 42 288 (23.5)    | 77 087 (21.6)   |
| Days on Rx, median (IQR)                 | N/A              | N/A              | 10.0 (7.0-20.0)  | 10.0 (7.0-17.0)  | 10.0 (7.0-12.0)  | 10.0 (7.0-20.0)  | 5.0 (5.0-11.0)   | 10.0 (7.0-16.0)  | 10.0 (10.0-20.0) | N/A             |
| Hospitalisation                          | 349 959 (29.5)   | 198 846 (45.4)   | 142 538 (45.3)   | 113 829 (52.5)   | 14 002 (60.3)    | 132 304 (38.8)   | 156 185 (67.9)   | 119 209 (45.9)   | 103 515 (42.5)   | 51 525 (14.4)   |
| Outpatient visits per year, median (IQR) | 19.6 (11.1-33.0) | 27.1 (17.2-42.7) | 27.3 (17.5-42.9) | 30.1 (19.0-47.8) | 34.0 (21.7-53.7) | 23.6 (14.5-37.5) | 24.6 (15.5-38.8) | 27.5 (17.2-43.2) | 26.6 (16.7-42.2) | 12.3 (6.0-21.8) |
| AMI                                      | 21 222 (2.1)     | 9999 (3.0)       | 6810 (2.9)       | 5862 (3.8)       | 698 (4.7)        | 6474 (2.5)       | 8079 (2.6)       | 6215 (3.2)       | 5282 (2.9)       | 5012 (1.4)      |
| Atrial fibrillation                      | 71 635 (7.1)     | 31 752 (9.7)     | 21 757 (9.3)     | 17 731 (11.4)    | 2028 (13.8)      | 23 974 (9.3)     | 26 182 (8.5)     | 21 935 (11.2)    | 18 764 (10.4)    | 16 314 (4.6)    |
| Cataract                                 | 488 608 (46.4)   | 183 877 (56.8)   | 141 966 (57.1)   | 88 574 (56.8)    | 9216 (62.6)      | 144 455 (55.7)   | 174 897 (56.6)   | 112 020 (57.2)   | 101 079 (56.3)   | 124 931 (35.1)  |
| Chronic kidney disease                   | 180 441 (17.9)   | 86 021 (26.5)    | 323 (26.5)       | 46 121 (29.6)    | 4651 (31.6)      | 53 713 (20.7)    | 65 577 (21.2)    | 50 361 (25.7)    | 43 182 (24.0)    | 42 916 (12.0)   |
| COPD                                     | 130 840 (13.0)   | 71 913 (22.1)    | 961 (18.7)       | 48 430 (31.0)    | 6106 (41.5)      | 40 109 (15.5)    | 66 536 (21.5)    | 37 413 (19.1)    | 37 579 (20.9)    | 22 739 (6.4)    |
| Heart failure                            | 103 010 (10.2)   | 51 814 (15.8)    | 870 (14.8)       | 31 377 (20.1)    | 3776 (25.6)      | 32 792 (12.7)    | 41 647 (13.5)    | 31 585 (16.1)    | 27 223 (15.2)    | 21 907 (6.1)    |
| Diabetes                                 | 284 919 (28.2)   | 113 427 (34.5)   | 175 (34.5)       | 57 697 (37.0)    | 5942 (40.3)      | 81 155 (31.3)    | 98 176 (31.8)    | 67 548 (34.5)    | 59 984 (33.4)    | 81 448 (22.9)   |
| Glaucoma                                 | 150 839 (14.9)   | 56 990 (17.3)    | 984 (17.9)       | 26 603 (17.1)    | 2930 (19.9)      | 45 597 (17.6)    | 54 726 (17.7)    | 33 936 (17.3)    | 31 065 (17.3)    | 42 355 (11.9)   |

Continued

believe this should have a value . Do not have the data in hand will try to get it tomorrow

## Open access

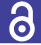

Table 1 Continued

| Variable                                           | Overall       | FLQ           | CIP           | L VX          | MXF          | AMX           | AZM           | LEX           | AMC           | None          |
|----------------------------------------------------|---------------|---------------|---------------|---------------|--------------|---------------|---------------|---------------|---------------|---------------|
| Hip/pelvic fracture                                | 7982 (0.8)    | 4086 (1.2)    | 3000 (1.3)    | 2289 (1.5)    | 274 (1.9)    | 2673 (1.0)    | 3005 (1.0)    | 2515 (1.3)    | 1914 (1.1)    | 1689 (0.5)    |
| Ischaemic heart disease                            | 264648 (26.2) | 117416 (35.7) | 82182 (35.0)  | 63659 (40.8)  | 6956 (47.2)  | 83682 (32.3)  | 101999 (33.0) | 70612 (36.1)  | 63363 (35.3)  | 63372 (17.8)  |
| Depression                                         | 210714 (20.9) | 94554 (28.8)  | 68625 (29.2)  | 49277 (31.6)  | 5298 (36.0)  | 65642 (25.3)  | 83253 (26.9)  | 56747 (29.0)  | 51150 (28.5)  | 49320 (13.8)  |
| Alzheimer's disease or senile dementia             | 39132 (3.9)   | 19796 (6.0)   | 14309 (6.1)   | 11030 (7.1)   | 1206 (8.2)   | 11140 (4.3)   | 13809 (4.5)   | 11846 (6.1)   | 9309 (5.2)    | 9400 (2.6)    |
| Osteoporosis                                       | 106966 (10.6) | 47033 (14.3)  | 35217 (15.0)  | 22918 (14.7)  | 2738 (18.6)  | 34610 (13.4)  | 44016 (14.2)  | 25995 (13.8)  | 24393 (13.6)  | 25216 (7.1)   |
| Rheumatoid arthritis/osteoarthritis                | 369584 (36.6) | 160091 (48.7) | 117018 (49.8) | 80115 (51.4)  | 8259 (56.1)  | 126702 (48.9) | 148653 (48.1) | 101310 (51.8) | 88017 (49.0)  | 81855 (23.0)  |
| Stroke/transient ischaemic attack                  | 58886 (5.8)   | 27702 (8.4)   | 19843 (8.4)   | 15051 (9.6)   | 1670 (11.3)  | 17829 (6.9)   | 22038 (7.1)   | 16684 (8.5)   | 14245 (7.9)   | 14262 (4.0)   |
| Breast cancer                                      | 45316 (4.5)   | 19362 (5.9)   | 14344 (6.1)   | 9442 (6.1)    | 984 (6.7)    | 13451 (5.2)   | 17676 (5.7)   | 12543 (6.4)   | 10156 (5.7)   | 11042 (3.1)   |
| Colorectal cancer                                  | 15905 (1.6)   | 7487 (2.3)    | 5421 (2.3)    | 4048 (2.6)    | 390 (2.6)    | 4304 (1.7)    | 5170 (1.7)    | 4085 (2.1)    | 3605 (2.0)    | 4104 (1.2)    |
| Prostate cancer                                    | 37038 (3.7)   | 19705 (6.0)   | 15577 (6.6)   | 9232 (5.9)    | 643 (4.4)    | 10967 (4.2)   | 11733 (3.8)   | 9252 (4.7)    | 8070 (4.5)    | 8333 (2.3)    |
| Lung cancer                                        | 14946 (1.5)   | 8965 (2.7)    | 5144 (2.2)    | 6356 (4.1)    | 905 (6.1)    | 3859 (1.5)    | 6633 (2.1)    | 3977 (2.0)    | 4267 (2.4)    | 2733 (0.8)    |
| Endometrial cancer                                 | 7396 (0.7)    | 3447 (1.0)    | 2670 (1.1)    | 1635 (1.0)    | 160 (1.1)    | 2095 (0.8)    | 2637 (0.9)    | 1957 (1.0)    | 1604 (0.9)    | 1847 (0.5)    |
| Anaemia                                            | 307310 (30.4) | 140606 (42.8) | 100819 (42.9) | 74308 (47.6)  | 7980 (54.2)  | 99190 (38.3)  | 118327 (38.3) | 81967 (41.9)  | 72587 (40.4)  | 71098 (20.0)  |
| Asthma                                             | 86120 (8.5)   | 46350 (14.1)  | 29327 (12.5)  | 30152 (19.3)  | 4091 (27.8)  | 27632 (10.7)  | 46823 (15.2)  | 24425 (12.5)  | 25465 (14.2)  | 13802 (3.9)   |
| Hyperlipidaemia                                    | 691148 (68.4) | 257086 (78.2) | 185199 (78.8) | 123828 (79.4) | 12162 (82.6) | 199236 (76.9) | 239414 (77.5) | 152879 (78.1) | 140364 (78.1) | 201258 (56.5) |
| Hyperplasia                                        | 122010 (12.1) | 59809 (18.2)  | 45517 (19.4)  | 28616 (18.3)  | 2587 (17.6)  | 39031 (15.1)  | 42070 (13.6)  | 31606 (16.1)  | 28398 (15.8)  | 27336 (7.7)   |
| Hypertension                                       | 679287 (67.3) | 253601 (77.2) | 181231 (77.1) | 124646 (79.9) | 12218 (83.0) | 192686 (74.4) | 230409 (74.6) | 150995 (77.1) | 136292 (75.9) | 201777 (56.6) |
| Hypothyroidism                                     | 197447 (19.6) | 81468 (24.8)  | 59450 (25.3)  | 40372 (25.9)  | 4198 (28.5)  | 59693 (23.1)  | 76582 (24.8)  | 47973 (24.5)  | 44249 (24.6)  | 50280 (14.1)  |
| Anxiety disorders                                  | 148983 (14.8) | 70688 (21.5)  | 51377 (21.9)  | 37563 (24.1)  | 4032 (27.4)  | 48859 (18.9)  | 62418 (20.2)  | 41655 (21.3)  | 37588 (20.9)  | 31709 (8.9)   |
| Bipolar disorder                                   | 17882 (1.8)   | 8368 (2.5)    | 6104 (2.6)    | 4533 (2.9)    | 468 (3.2)    | 5442 (2.1)    | 6658 (2.2)    | 5147 (2.6)    | 4227 (2.4)    | 4242 (1.2)    |
| Major depressive affective disorder                | 153182 (15.2) | 71732 (21.8)  | 52101 (22.2)  | 38055 (24.4)  | 4148 (28.2)  | 48846 (18.9)  | 61872 (20.0)  | 43416 (22.2)  | 38642 (21.5)  | 33660 (9.4)   |
| Schizophrenia and other psychotic disorders        | 16764 (1.7)   | 8591 (2.6)    | 6176 (2.6)    | 4934 (3.2)    | 548 (3.7)    | 4421 (1.7)    | 5597 (1.8)    | 5101 (2.6)    | 3811 (2.1)    | 4300 (1.2)    |
| Epilepsy                                           | 16155 (1.6)   | 7543 (2.3)    | 5383 (2.3)    | 4269 (2.7)    | 415 (2.8)    | 4310 (1.7)    | 5488 (1.8)    | 4510 (2.3)    | 3621 (2.0)    | 4191 (1.2)    |
| Fibromyalgia, chronic pain and fatigue             | 166279 (16.5) | 78877 (24.0)  | 57494 (24.5)  | 41843 (26.8)  | 4410 (29.9)  | 56152 (21.7)  | 70667 (22.9)  | 48422 (24.7)  | 43379 (24.2)  | 33843 (9.5)   |
| Viral hepatitis (general)                          | 11969 (1.2)   | 4659 (1.4)    | 3188 (1.4)    | 2523 (1.6)    | 287 (1.9)    | 3156 (1.2)    | 3732 (1.2)    | 2712 (1.4)    | 2348 (1.3)    | 3735 (1.0)    |
| Liver disease cirrhosis and other liver conditions | 62675 (6.2)   | 31930 (9.7)   | 23284 (9.9)   | 17386 (11.1)  | 1919 (13.0)  | 19624 (7.6)   | 24544 (7.9)   | 17393 (8.9)   | 15958 (8.9)   | 13350 (3.7)   |
| Leukaemias and lymphomas                           | 13906 (1.4)   | 7228 (2.2)    | 4822 (2.1)    | 4536 (2.9)    | 551 (3.7)    | 4385 (1.7)    | 5905 (1.9)    | 4025 (2.1)    | 3969 (2.2)    | 2758 (0.8)    |

Continued

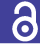

Open access

**Table 1 Continued**

| Variable                            | Overall        | FLQ           | CIP           | LVX           | MXF          | AMX           | AZM           | LEX           | AMC           | None          |
|-------------------------------------|----------------|---------------|---------------|---------------|--------------|---------------|---------------|---------------|---------------|---------------|
| Migraine and other chronic headache | 31 628 (3.1)   | 14 936 (4.5)  | 11 282 (4.8)  | 7 520 (4.8)   | 873 (5.9)    | 10 841 (4.2)  | 13 893 (4.5)  | 8763 (4.5)    | 8403 (4.7)    | 6419 (1.8)    |
| Mobility impairments                | 20 600 (2.0)   | 10 182 (3.1)  | 7 356 (3.1)   | 5 767 (3.7)   | 577 (3.9)    | 5 372 (2.1)   | 6 629 (2.1)   | 5 995 (3.1)   | 4 610 (2.6)   | 5 439 (1.5)   |
| Obesity                             | 185 101 (18.3) | 79 130 (24.1) | 56 609 (24.1) | 41 226 (26.4) | 3 997 (27.1) | 58 654 (22.6) | 69 611 (22.5) | 49 984 (25.5) | 43 740 (24.4) | 44 772 (12.6) |
| Peripheral vascular disease         | 90 132 (8.9)   | 45 276 (13.8) | 31 866 (13.6) | 25 977 (16.7) | 3 001 (20.4) | 28 747 (11.1) | 36 241 (11.7) | 28 343 (14.5) | 23 977 (13.3) | 18 446 (5.2)  |
| Tobacco use disorders               | 101 890 (10.1) | 45 304 (13.8) | 28 907 (12.3) | 27 202 (17.4) | 3 042 (20.7) | 27 261 (10.5) | 37 860 (12.3) | 25 002 (12.8) | 22 975 (12.8) | 26 896 (7.5)  |
| Pressure ulcers and chronic ulcers  | 30 345 (3.0)   | 17 688 (5.4)  | 12 800 (5.4)  | 10 603 (6.8)  | 1 196 (8.1)  | 9 006 (3.5)   | 10 926 (3.5)  | 13 404 (6.8)  | 9 960 (5.5)   | 4 992 (1.4)   |
| Deafness and hearing impairment     | 59 576 (5.9)   | 27 383 (8.3)  | 19 976 (8.5)  | 14 014 (9.0)  | 1 609 (10.9) | 21 213 (8.2)  | 25 498 (8.3)  | 16 849 (8.6)  | 16 787 (9.3)  | 11 900 (3.3)  |

Data are presented as no. (%) of patients unless otherwise noted.

AMC, amoxicillin clavulanate; AMX, amoxicillin; AZT, azithromycin; CIP, ciprofloxacin; FLQ, fluoroquinolone; LEX, levofloxacin; MXF, moxifloxacin.

**Table 2** HRs of tendon rupture for each covariate

| Variables                              | Reference         | HR (95% CI)          |
|----------------------------------------|-------------------|----------------------|
| Female                                 | Male              | 0.70 (0.69 to 0.72)↓ |
| Black                                  | White             | 0.76 (0.73 to 0.78)↓ |
| Hispanic                               |                   | 0.91 (0.87 to 0.94)↓ |
| Asian                                  |                   | 0.67 (0.63 to 0.71)↓ |
| Other                                  |                   | 1.05 (1.01 to 1.09)↑ |
| Dual ever                              | Non-Dual          | 0.66 (0.64 to 0.68)↓ |
| Non-dual lis                           | Non-LIS           | 0.66 (0.63 to 0.70)↓ |
| Living in rural area                   | No                | 0.94 (0.92 to 0.95)↓ |
| Medicare part d since 2008             | Medicare          | 1.03 (1.00 to 1.07)  |
| Medicare part d since 2009             | Part D Since 2007 | 1.11 (1.07 to 1.15)↑ |
| Medicare part d since 2010             |                   | 1.16 (1.12 to 1.21)↑ |
| Medicare part d since 2011             |                   | 1.17 (1.13 to 1.22)↑ |
| Medicare part d since 2012             |                   | 1.12 (1.08 to 1.16)↑ |
| Medicare part d since 2013             |                   | 1.03 (1.00 to 1.07)  |
| Medicare part d since 2013             |                   | 1.05 (1.01 to 1.09)↑ |
| Medicare part d since 2015             |                   | 0.91 (0.87 to 0.96)↓ |
| Medicare part d since 2016             |                   | 0.93 (0.19 to 4.55)  |
| AMI                                    | No                | 0.74 (0.69 to 0.79)↓ |
| Atrial fibrillation                    | No                | 0.94 (0.91 to 0.97)↓ |
| Cataract                               | No                | 1.23 (1.21 to 1.25)↑ |
| Chronic kidney disease                 | No                | 0.92 (0.89 to 0.94)↓ |
| COPD                                   | No                | 0.83 (0.81 to 0.86)↓ |
| Heart failure                          | No                | 0.79 (0.77 to 0.82)↓ |
| Diabetes                               | No                | 0.98 (0.96 to 0.99)↓ |
| Glaucoma                               | No                | 1.10 (1.08 to 1.12)↑ |
| Hip/pelvic fracture                    | No                | 0.68 (0.60 to 0.77)↓ |
| Ischaemic heart disease                | No                | 1.10 (1.08 to 1.12)↑ |
| Depression                             | No                | 1.17 (1.13 to 1.21)  |
| Alzheimer's disease or senile dementia | No                | 0.67 (0.63 to 0.71)↓ |
| Osteoporosis                           | No                | 1.03 (1.01 to 1.06)↑ |
| Rheumatoid arthritis/osteoarthritis    | No                | 2.84 (2.80 to 2.89)↑ |
| Stroke/transient ischaemic attack      | No                | 0.97 (0.94 to 1.01)  |
| Breast cancer                          | No                | 0.94 (0.91 to 0.98)↓ |
| Colorectal cancer                      | No                | 0.79 (0.74 to 0.85)↓ |
| Prostate cancer                        | No                | 1.03 (0.99 to 1.07)  |
| Lung cancer                            | No                | 0.39 (0.34 to 0.45)↓ |
| Endometrial cancer                     | No                | 0.85 (0.77 to 0.94)↓ |
| Anaemia                                | No                | 1.01 (0.99 to 1.03)  |
| Asthma                                 | No                | 1.27 (1.24 to 1.31)↑ |
| Hyperlipidaemia                        | No                | 1.34 (1.31 to 1.36)↑ |
| Hyperplasia                            | No                | 1.13 (1.10 to 1.16)↑ |
| Hypertension                           | No                | 1.09 (1.07 to 1.11)↑ |
| Hypothyroidism                         | No                | 1.08 (1.06 to 1.10)↑ |
| Anxiety disorders                      | No                | 0.98 (0.96 to 1.01)  |

Continued

Open access

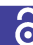

Table 2 Continued

| Variables                                          | Reference | HR (95% CI)          |
|----------------------------------------------------|-----------|----------------------|
| Bipolar disorder                                   | No        | 1.02 (0.95 to 1.08)  |
| Major depressive affective disorder                | No        | 1.06 (1.02 to 1.10)↑ |
| Schizophrenia and other psychotic disorders        | No        | 0.67 (0.61 to 0.74)↓ |
| Epilepsy                                           | No        | 0.83 (0.77 to 0.89)  |
| Fibromyalgia, chronic pain and fatigue             | No        | 1.39 (1.27 to 1.51)  |
| Viral hepatitis (general)                          | No        | 1.04 (0.98 to 1.10)  |
| Liver disease cirrhosis and other liver conditions | No        | 0.95 (0.89 to 1.01)  |
| Leukaemias and lymphomas                           | No        | 0.91 (0.85 to 0.97)  |
| Migraine and other chronic headache                | No        | 1.25 (1.18 to 1.32)  |
| Mobility impairments                               | No        | 0.70 (0.65 to 0.76)↓ |
| Obesity                                            | No        | 1.04 (1.02 to 1.06)↑ |
| Peripheral vascular disease                        | No        | 1.00 (0.97 to 1.04)  |
| Tobacco use disorders                              | No        | 1.00 (0.97 to 1.04)  |
| Pressure ulcers and chancres                       | No        | 1.00 (0.97 to 1.04)  |
| Deafness and hearing impairment                    | No        | 1.00 (0.97 to 1.04)  |

the very significant arrows (for High and for low) have double arrow heads highlighting that fact. However the next arrows are taller which suggests they are stronger. Confusing the message. the two arrows should be of same size, One with a double head and one without. This applies to the results this applies to all of legends with arrows

insert "very" in front of significantly to set it off from the next one. Rather than high the word should be "increased in both places in this sentence"

Effect of antibiotics

We report HRs from our primary analysis in tables separate from the non-antibiotic covariates. Table 3 shows the risk associated with each study antibiotic broken down by time lag between the antibiotic use and the TRs (separate rows), and by all TRs together and separately by anatomic sites (in columns). We also report HRs of the used multiplicity corrected test the difference of pairs of chance of finding statistically random chance.<sup>35</sup> Of the total occurrence, complete rupture of the major share (80.5%), 9%) and Achilles TR (2.6%). followed patients until the first figures count only the first TR anatomic site.

Of the non-FQ antibiotics, AMX exhibited a reduced risk of TR compared with no AMX in every tendon class and time window, similar to its low risk in previous studies. It exhibited a significantly lower risk in the ≤30 days window except for the Achilles tendon. AZM and AMC exhibited a similar benefit to AMX in all TR classes except for TR of rotator cuff in >30 days window. LEX was the surprise non-FQ antibiotic. It exhibited modest to large increased TR risk at ≤30 days window across all sites ranging from a low of 19% increase for complete rupture of rotator cuff to a high 92% increase for Achilles TR. Its risk was also significantly higher at ≤30 days window for all TRs taken together.

Of the most and least frequently prescribed antibiotics, the most and least frequently prescribed antibiotics exhibited no increased risk of TR within each anatomic site and each time frame. LVX is the only FQ to exhibit a significant increase in TR risk—of 16%, and 120% for rupture of rotator cuff and Achilles TR, respectively, in the ≤30 days window. Notably, the risk of LVX never exceeded the risk of the non-FQ, LEX in any comparison.

Replace "low" with "small,"

replace "high" with "large," and add a comma after "93%"

HRs and CIs from the primary analysis for covariates except for the study antibiotics (which are in table 3).

↑=significantly high with P value<0.001, ↑=significantly high with 0.001≤p<0.05.

↓=significantly low with P value<0.001, ↓=significantly high with 0.001≤p<0.05.

AMC, amoxicillin clavulanate; AMX, amoxicillin; AZT, azithromycin; CIP, ciprofloxacin; FLQ, fluoroquinolone; LEX, cephalexin; LVX, levofloxacin; MXF, moxifloxacin.

"high" is the wrong word, it is not high. Replace with "reduced"

two problems the instead of significantly low, it should be very significantly reduced here.

increased TR risk. Mobility impairments, of TR similar to that of the severe conditions, likely due to reduced activity.

low life threats such as cataract, glaucoma, depression, asthma, hyperlipidaemia, hypertension, prostatic hypertrophy, chronic headache, and deafness/ hearing impairment. Patients with comorbid risks of 8% to 34% above control possibly due to longer life spans. Ischaemic heart did not fit the mould of sicker equals lower TR risk. Patients with rheumatoid arthritis/osteoarthritis were a special case and had TR risk of 184% above control possibly due to joint and associated tendon inflammation with these disorders. Fibromyalgia/chronic pain and fatigue also exhibited a 39% increased risk of TR possibly also due to an inflammatory component.

The Achilles tendon carries the full force of the extra weight carried by obese patients and obesity was associated with a significant (13%) increase in Achilles TR ruptures while its effect on other TR classes was significant but minuscule (2%–3%) (data not shown).



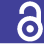

Open access

Table 3 HRs of each antibiotic by anatomic sites and temporal order of drug exposure

| Temporal exposure    | Any tendon rupture |                       | Achilles tendon rupture |                       | Complete rupture of rotator cuff |                       | Other tendon ruptures |             | Death (competing risk) |             |
|----------------------|--------------------|-----------------------|-------------------------|-----------------------|----------------------------------|-----------------------|-----------------------|-------------|------------------------|-------------|
|                      | HR (95% CI)        | HR (95% CI)           | HR (95% CI)             | HR (95% CI)           | HR (95% CI)                      | HR (95% CI)           | HR (95% CI)           | HR (95% CI) | HR (95% CI)            | HR (95% CI) |
| AMX versus NO<br>AMX | ≤30 days           | 0.86 (0.80 to 0.92) ↓ | 0.88 (0.59 to 1.33)     | 0.88 (0.82 to 0.95) ↓ | 0.79 (0.67 to 0.93) ↓            | 0.66 (0.61 to 0.71) ↓ |                       |             |                        |             |
|                      | 31–60 days         | 0.94 (0.87 to 1.01)   | 0.80 (0.49 to 1.31)     | 0.91 (0.84 to 0.99) ↓ | 1.08 (0.93 to 1.27)              | 0.69 (0.63 to 0.75) ↓ |                       |             |                        |             |
|                      | ≥61 days           | 1.00 (0.98 to 1.02)   | 0.99 (0.86 to 1.13)     | 1.01 (0.99 to 1.04)   | 0.97 (0.92 to 1.01)              | 0.77 (0.75 to 0.78) ↓ |                       |             |                        |             |
| AMC versus NO<br>AMC | ≤30 days           | 0.93 (0.85 to 1.02)   | 1.25 (0.79 to 1.97)     | 0.87 (0.79 to 0.97) ↓ | 1.17 (0.98 to 1.41)              | 1.37 (1.30 to 1.45) ↑ |                       |             |                        |             |
|                      | 31–60 days         | 0.95 (0.85 to 1.05)   | 1.37 (0.82 to 2.29)     | 0.95 (0.84 to 1.06)   | 0.81 (0.63 to 1.04)              | 1.26 (1.17 to 1.35) ↑ |                       |             |                        |             |
|                      | ≥61 days           | 1.07 (1.04 to 1.09) ↑ | 0.95 (0.81 to 1.12)     | 1.07 (1.04 to 1.10) ↑ | 1.02 (0.96 to 1.08)              | 0.86 (0.84 to 0.88) ↓ |                       |             |                        |             |
| AZM versus NO<br>AZM | ≤30 days           | 0.99 (0.93 to 1.06)   | 1.15 (0.82 to 1.63)     | 1.00 (0.93 to 1.08)   | 0.87 (0.75 to 1.01)              | 0.80 (0.75 to 0.84) ↓ |                       |             |                        |             |
|                      | 31–60 days         | 0.90 (0.84 to 0.98) ↓ | 0.99 (0.65 to 1.49)     | 0.91 (0.84 to 0.99) ↓ | 0.95 (0.81 to 1.11)              | 0.77 (0.73 to 0.82) ↓ |                       |             |                        |             |
|                      | ≥61 days           | 1.07 (1.05 to 1.09) ↑ | 1.02 (0.91 to 1.15)     | 1.09 (1.07 to 1.12) ↑ | 0.99 (0.95 to 1.04)              | 0.71 (0.70 to 0.72) ↓ |                       |             |                        |             |
| LEX versus NO LEX    | ≤30 days           | 1.31 (1.22 to 1.41) ↑ | 1.93 (1.35 to 2.75) ↑   | 1.19 (1.09 to 1.29) ↑ | 1.79 (1.56 to 2.06) ↑            | 1.04 (0.98 to 1.10)   |                       |             |                        |             |
|                      | 31–60 days         | 1.05 (0.95 to 1.15)   | 1.14 (0.66 to 1.96)     | 1.06 (0.96 to 1.18)   | 1.02 (0.82 to 1.26)              | 1.01 (0.94 to 1.08)   |                       |             |                        |             |
|                      | ≥61 days           | 1.08 (1.05 to 1.11) ↑ | 1.00 (0.85 to 1.16)     | 1.07 (1.05 to 1.10) ↑ | 1.15 (1.09 to 1.21) ↑            | 0.86 (0.84 to 0.88) ↓ |                       |             |                        |             |
| LVX versus NO LVX    | ≤30 days           | 1.14 (1.05 to 1.25) ↑ | 2.20 (1.50 to 3.24) ↑   | 1.16 (1.06 to 1.28) ↑ | 0.96 (0.78 to 1.19)              | 2.19 (2.11 to 2.28) ↑ |                       |             |                        |             |
|                      | 31–60 days         | 1.09 (0.98 to 1.21)   | 1.91 (1.17 to 3.10) ↑   | 1.09 (0.97 to 1.22)   | 1.14 (0.90 to 1.43)              | 1.80 (1.71 to 1.89) ↑ |                       |             |                        |             |
|                      | ≥61 days           | 1.02 (1.00 to 1.05)   | 1.22 (1.03 to 1.43) ↑   | 1.03 (1.00 to 1.07) ↑ | 0.97 (0.91 to 1.03)              | 0.99 (0.97 to 1.01)   |                       |             |                        |             |
| CIP versus NO CIP    | ≤30 days           | 0.96 (0.89 to 1.03)   | 1.06 (0.70 to 1.60)     | 0.96 (0.88 to 1.04)   | 0.84 (0.71 to 1.00) ↓            | 1.46 (1.40 to 1.53) ↑ |                       |             |                        |             |
|                      | 31–60 days         | 0.92 (0.85 to 1.01)   | 1.02 (0.63 to 1.67)     | 0.91 (0.82 to 1.00) ↓ | 0.95 (0.78 to 1.14)              | 1.31 (1.24 to 1.38) ↑ |                       |             |                        |             |
|                      | ≥61 days           | 0.96 (0.94 to 0.98) ↓ | 1.16 (1.02 to 1.32) ↑   | 0.96 (0.94 to 0.99) ↓ | 0.92 (0.88 to 0.97) ↓            | 0.86 (0.84 to 0.88) ↓ |                       |             |                        |             |
| MXF versus NO<br>MXF | ≤30 days           | 0.59 (0.37 to 0.93)   | 0.97 (0.15 to 6.24)     | 0.52 (0.30 to 0.91) ↓ | 0.76 (0.33 to 1.77)              | 2.05 (1.78 to 2.35) ↑ |                       |             |                        |             |
|                      | 31–60 days         | 0.71 (0.43 to 1.15)   | 0.00 (0.00 to 0.00)     | 0.63 (0.35 to 1.13)   | 0.93 (0.39 to 2.25)              | 1.43 (1.18 to 1.72) ↑ |                       |             |                        |             |
|                      | ≥61 days           | 0.99 (0.93 to 1.06)   | 1.02 (0.69 to 1.51)     | 0.99 (0.92 to 1.06)   | 1.10 (0.95 to 1.27)              | 0.89 (0.86 to 0.93) ↓ |                       |             |                        |             |
| FLQ versus AMX       | ≤30 days           | 1.00 (0.84 to 1.19)   | 1.49 (0.69 to 3.19)     | 0.94 (0.77 to 1.16)   | 1.08 (0.77 to 1.50)              | 2.86 (2.61 to 3.13) ↑ |                       |             |                        |             |
|                      | 31–60 days         | 0.95 (0.79 to 1.15)   | 0.07 (0.04 to 0.12) ↓   | 0.94 (0.75 to 1.17)   | 0.92 (0.65 to 1.31)              | 2.18 (1.96 to 2.44) ↑ |                       |             |                        |             |
|                      | ≥61 days           | 0.99 (0.96 to 1.02)   | 1.14 (0.94 to 1.40)     | 0.98 (0.95 to 1.02)   | 1.03 (0.96 to 1.11)              | 1.19 (1.16 to 1.22) ↑ |                       |             |                        |             |
| FLQ versus AZM       | ≤30 days           | 0.87 (0.73 to 1.03)   | 1.14 (0.54 to 2.39)     | 0.83 (0.68 to 1.02)   | 0.98 (0.70 to 1.37)              | 2.35 (2.18 to 2.53) ↑ |                       |             |                        |             |
|                      | 31–60 days         | 0.99 (0.82 to 1.19)   | 0.06 (0.04 to 0.09) ↓   | 0.93 (0.75 to 1.16)   | 1.06 (0.75 to 1.49)              | 1.94 (1.77 to 2.13) ↑ |                       |             |                        |             |
|                      | ≥61 days           | 0.93 (0.90 to 0.96) ↓ | 1.10 (0.91 to 1.34)     | 0.91 (0.88 to 0.94) ↓ | 1.00 (0.93 to 1.08)              | 1.29 (1.25 to 1.32) ↑ |                       |             |                        |             |
| FLQ versus LEX       | ≤30 days           | 0.66 (0.55 to 0.78) ↓ | 0.68 (0.32 to 1.42)     | 0.70 (0.57 to 0.87) ↓ | 0.47 (0.34 to 0.66) ↓            | 1.80 (1.67 to 1.95) ↑ |                       |             |                        |             |
|                      | 31–60 days         | 0.85 (0.70 to 1.04)   | 0.05 (0.03 to 0.09) ↓   | 0.80 (0.64 to 1.01)   | 0.99 (0.68 to 1.44)              | 1.48 (1.34 to 1.64) ↑ |                       |             |                        |             |
|                      | ≥61 days           | 0.92 (0.89 to 0.95) ↓ | 1.13 (0.92 to 1.40)     | 0.92 (0.89 to 0.96) ↓ | 0.86 (0.80 to 0.93) ↓            | 1.06 (1.03 to 1.09) ↑ |                       |             |                        |             |

Continued

AUTHOR PROOF

## Open access



AUTHOR PROOF

Table 3 Continued

| Temporal exposure | Any tendon rupture    |                       | Achilles tendon rupture |                     | Complete rupture of rotator cuff |             | Other tendon ruptures |             | Death (competing risk) |             |
|-------------------|-----------------------|-----------------------|-------------------------|---------------------|----------------------------------|-------------|-----------------------|-------------|------------------------|-------------|
|                   | HR (95% CI)           | HR (95% CI)           | HR (95% CI)             | HR (95% CI)         | HR (95% CI)                      | HR (95% CI) | HR (95% CI)           | HR (95% CI) | HR (95% CI)            | HR (95% CI) |
| ≤30 days          | 0.93 (0.77 to 1.11)   | 1.05 (0.48 to 2.32)   | 0.96 (0.77 to 1.19)     | 0.72 (0.51 to 1.02) | 1.37 (1.27 to 1.48) †            |             |                       |             |                        |             |
| 31–60 days        | 0.94 (0.77 to 1.15)   | 0.04 (0.02 to 0.07) † | 0.90 (0.72 to 1.14)     | 1.24 (0.83 to 1.86) | 1.19 (1.08 to 1.31) †            |             |                       |             |                        |             |
| ≥61 days          | 0.93 (0.90 to 0.97) † | 1.19 (0.95 to 1.49)   | 0.93 (0.89 to 0.96) †   | 0.98 (0.90 to 1.06) | 1.06 (1.03 to 1.09) †            |             |                       |             |                        |             |

† = significantly high with  $p < 0.001$ , † = significantly high with  $0.001 \leq p < 0.05$ .‡ = significantly low with  $p < 0.001$ , ‡ = significantly high with  $0.001 \leq p < 0.05$ .

AMC, amoxicillin clavulanate; AMX, amoxicillin; AZT, azithromycin; CIP, ciprofloxacin; FLQ, fluoroquinolone; LEX, cephalosporin; LVX, levofloxacin; MXF, moxifloxacin.

death in a  $\leq 30$  days window. Overall, risk of death for FQs as a class far outweighed that of each non-FQ antibiotics.

## DISCUSSION

Our results conflict with the common assertion that the Achilles TR is the most common TR (up to 90% in one report<sup>36</sup>). In our elderly cohort, Achilles TRs were a tiny, 2.6%, of all TRs. Some of this difference may be explained by the differences in demographics. Reports of high prevalence of Achilles TR came from studies of young military populations.<sup>37 38</sup> In contrast, our data came from an elderly Medicare population. Some of the difference could also be due to less ability to diagnose non-Achilles TRs until MRI joint imaging became widely available, because such TRs are less amenable to diagnosis by physical exam.

Many authorities describe the relationship between FQs and TRs as a class 'effect'. However, FQs as a class had no significant risk of TR compared with each of the four non-FQ antibiotics in any time window. CIP (n=2 34994 subjects) is the oral FQ with the greatest use and with a greater effect on metalloproteases than other FQs.<sup>39–41</sup> However, neither MXF (n=14 728 subjects) nor CIP had any TR risk at any anatomic site in any time window. CIP's lack of risk is consistent with two studies<sup>5 9</sup> in which CIP exhibited zero risk or small risks compared with ofloxacin, a racemic mixture whose active ingredient is the levo-isomer, LVX. We do see a strong association between LVX and TRs whether we used no LVX or three of the non-FQ antibiotics as controls. However, when we used LEX, a cephalosporin, as the control for LVX's effect on TRs, we saw no increased risk.

As noted in the introduction, the FDA has added a black box warning about TRs to the labels of FQs. A 2015 paper<sup>42</sup> described the evidence for this decision based on the FDA's Adverse Event Reporting System (FAERS) database and an empirical Bayes geometric mean (EBGM) score, which is based on the relative frequency of spontaneous report about a given adverse event in one drug vs the reporting of that adverse event across all drugs. This EBGM score based on FAERS database has been useful but FAERS database is still limited by a lack of true denominator for population at risk, under-reporting due

this legend has the same problem as that of table 2 We were trying to highlight the very significant results (the first in the line) with double headed arrows, and the just significant with single headed arrow. but the single headed arrows are bigger confusing which one is better. either use one double headed and the not double headed but the same size k, Or use two arrows for the stronger effect. Would I like to add the word : "very" in front of significant for where the significance ,0.001 and not in front to the other

In addition instead of low and high should say increased (Instead of high and reduced instead of low \\\

Finally as in table 2 the second line with downward pointing arrows says low for the very significant result and



Open access

**Table 4** Pairwise comparisons

| Comparison                                                                                    | Temporal exposure | Any tendon rupture   |                      | Achilles tendon rupture |                      | Complete rupture of rotator cuff |             | Other tendon rupture |             | Death (competing risk) |             |
|-----------------------------------------------------------------------------------------------|-------------------|----------------------|----------------------|-------------------------|----------------------|----------------------------------|-------------|----------------------|-------------|------------------------|-------------|
|                                                                                               |                   | HR (95% CI)          | HR (95% CI)          | HR (95% CI)             | HR (95% CI)          | HR (95% CI)                      | HR (95% CI) | HR (95% CI)          | HR (95% CI) | HR (95% CI)            | HR (95% CI) |
| HRs comparing use of each FQ with use of each non-FQ antibiotics in a ≤30 days window         |                   |                      |                      |                         |                      |                                  |             |                      |             |                        |             |
| CIP versus LVX                                                                                | ≤30 days          | 0.84 (0.75 to 0.94)↓ | 0.48 (0.27 to 0.86)↓ | 0.82 (0.73 to 0.94)↓    | 0.87 (0.67 to 1.15)  | 0.67 (0.63 to 0.71)↓             |             |                      |             |                        |             |
| CIP versus MXF                                                                                | ≤30 days          | 1.63 (1.02 to 2.61)↑ | 1.08 (0.16 to 7.29)  | 1.84 (1.05 to 3.24)↑    | 1.10 (0.47 to 2.60)  | 0.72 (0.62 to 0.83)↓             |             |                      |             |                        |             |
| LVX versus MXF                                                                                | ≤30 days          | 1.95 (1.21 to 3.13)↑ | 2.26 (0.34 to 15.17) | 2.24 (1.27 to 3.94)↑    | 1.26 (0.53 to 3.01)  | 1.07 (0.93 to 1.24)              |             |                      |             |                        |             |
| HRs comparing use of each FQ with use of each non-FQ antibiotics across different time window |                   |                      |                      |                         |                      |                                  |             |                      |             |                        |             |
| CIP versus AMX                                                                                | <30 days          | 1.11 (1.01 to 1.23)↑ | 1.20 (0.66 to 2.16)  | 1.09 (0.97 to 1.21)     | 1.06 (0.84 to 1.34)  | 2.23 (2.05 to 2.44)↑             |             |                      |             |                        |             |
| CIP versus AZM                                                                                | <30 days          | 0.97 (0.87 to 1.06)  | 0.91 (0.53 to 1.57)  | 0.96 (0.86 to 1.07)     | 0.96 (0.77 to 1.21)  | 1.84 (1.71 to 1.97)↑             |             |                      |             |                        |             |
| CIP versus LEX                                                                                | <30 days          | 0.73 (0.66 to 0.81)↓ | 0.55 (0.31 to 0.95)↓ | 0.81 (0.72 to 0.91)↓    | 0.47 (0.37 to 0.59)↑ | 1.41 (1.31 to 1.52)↑             |             |                      |             |                        |             |
| CIP versus MXF                                                                                | <30 days          | 1.03 (0.91 to 1.16)  | 0.84 (0.46 to 1.56)  | 1.10 (0.96 to 1.25)     | 0.71 (0.56 to 0.92)↓ | 1.07 (1.00 to 1.15)              |             |                      |             |                        |             |
| CIP versus LVX                                                                                | <30 days          | 1.33 (1.19 to 1.49)↑ | 2.50 (1.45 to 4.29)↑ | 1.32 (1.16 to 1.49)↑    | 1.22 (0.93 to 1.59)  | 3.34 (3.07 to 3.64)↑             |             |                      |             |                        |             |
| CIP versus AMX                                                                                | <30 days          | 1.15 (1.03 to 1.29)↑ | 1.91 (1.13 to 3.23)↑ | 1.16 (1.03 to 1.31)↑    | 1.10 (0.84 to 1.44)  | 2.75 (2.57 to 2.95)↑             |             |                      |             |                        |             |
| CIP versus AZM                                                                                | <30 days          | 0.87 (0.78 to 0.98)↓ | 1.14 (0.68 to 1.92)  | 0.98 (0.86 to 1.12)     | 0.54 (0.41 to 0.69)↑ | 2.11 (1.97 to 2.27)↑             |             |                      |             |                        |             |
| CIP versus LEX                                                                                | <30 days          | 1.23 (1.08 to 1.40)↑ | 1.76 (0.98 to 3.15)  | 1.33 (1.15 to 1.54)↑    | 0.82 (0.62 to 1.08)  | 1.60 (1.49 to 1.72)↑             |             |                      |             |                        |             |
| CIP versus MXF                                                                                | <30 days          | 0.68 (0.43 to 1.09)  | 1.10 (0.16 to 7.41)  | 0.59 (0.34 to 1.03)     | 0.96 (0.41 to 2.27)  | 3.12 (2.67 to 3.65)↑             |             |                      |             |                        |             |
| CIP versus LVX                                                                                | <30 days          | 0.59 (0.37 to 0.94)↓ | 0.84 (0.13 to 5.65)  | 0.52 (0.30 to 0.91)↓    | 0.88 (0.37 to 2.07)  | 2.57 (2.21 to 2.98)↑             |             |                      |             |                        |             |
| AMX versus AZM                                                                                | <30 days          | 0.45 (0.28 to 0.72)↓ | 0.50 (0.08 to 3.35)  | 0.44 (0.25 to 0.77)↓    | 0.43 (0.18 to 1.00)  | 1.97 (1.70 to 2.29)↑             |             |                      |             |                        |             |
| AMX versus LEX                                                                                | <30 days          | 0.63 (0.39 to 1.01)  | 0.78 (0.11 to 5.33)  | 0.60 (0.34 to 1.05)     | 0.65 (0.28 to 1.53)  | 1.50 (1.29 to 1.73)↑             |             |                      |             |                        |             |
| HRs comparing use of each non-FQ antibiotics across different time window                     |                   |                      |                      |                         |                      |                                  |             |                      |             |                        |             |
| FLQ versus AMX                                                                                | Overall           | 0.98 (0.90 to 1.07)  | 0.49 (0.36 to 0.68)  | 0.95 (0.86 to 1.06)     | 1.01 (0.86 to 1.19)  | 1.95 (1.86 to 2.05)↑             |             |                      |             |                        |             |
| FLQ versus AZM                                                                                | Overall           | 0.93 (0.85 to 1.01)  | 0.42 (0.30 to 0.57)  | 0.89 (0.80 to 0.98)↓    | 1.01 (0.86 to 1.19)  | 1.80 (1.73 to 1.88)↑             |             |                      |             |                        |             |
| FLQ versus LEX                                                                                | Overall           | 0.80 (0.73 to 0.88)  | 0.34 (0.24 to 0.47)  | 0.80 (0.72 to 0.89)     | 0.74 (0.62 to 0.88)  | 1.42 (1.35 to 1.48)↑             |             |                      |             |                        |             |
| FLQ versus AMC                                                                                | Overall           | 0.93 (0.85 to 1.02)  | 0.37 (0.26 to 0.52)  | 0.93 (0.83 to 1.03)     | 0.96 (0.80 to 1.15)  | 1.20 (1.15 to 1.25)↑             |             |                      |             |                        |             |

↑=significantly high with  $p<0.001$ , ↓=significantly low with  $p<0.001$ ↑=significantly high with  $0.001 \leq p < 0.05$ , ↓=significantly low with  $0.001 \leq p < 0.05$ 

AMC, amoxicillin clavulanate; AMX, amoxicillin; AZT, azithromycin; CIP, ciprofloxacin; FQ, fluoroquinolones; LEX, ceftazidime; LVX, levofloxacin; MXF, moxifloxacin.

legend about the upward pointing and downward pointing arrows in table 4 has the same problem as table 2 and 3.

I can be reached at 240-274-8111 in the AM on Friday

AUTHOR PROOF

## Open access



5 and 111). In comparison, our study included 12517 (3.8%) such patients. One previous study did report a large number of TR events, 23000 (3.5%) patients while on FQs and, like our study, it focused exclusively on elderly patients.<sup>3</sup> However, it did not compare the population of FQ users against non-users but FQ usage periods against non-usage periods in the same set of patients, which were likely periods without visits and thus could not account for the effect of increased clinical attention provided at visits requiring a strong systemic antibiotic. Furthermore, they assessed the association between AMX and TRs in separate analysis and used the risk of TRs in that analysis as the comparator for the risk observed in the FQ analysis. Finally, their analysis did not include death as a competing risk as is recommend when death rates exceed event rates<sup>23</sup> which was likely the case because in the demographics of their study was very similar to ours.

In our study, AMX treated patients exhibited a similar absolute risk of TR as to LVX treated patients (7.56 vs 7.47 per 1000 patient years). However, they had fewer comorbidities (as in Daneman's study), almost 14% fewer hospitalisations and half of death rate, compared with patients taking LVX (7.56 vs 18.50 per 1000 patient years). So, the two populations are not comparable. LVX exhibited 119% increased risk of death in a  $\leq 30$  days window. They appears to be reserved for more severe infections or more fragile patients and thus subject to differential biases.

The reported activation of metalloprotease activity by FQs has underpinned the idea of a causal link between FQs and TRs. The argument goes as follows: FQs stimulate metalloproteases, which can break down collagen; the tendon is made of collagen; so FQs may cause TRs. However, our data disrupt this argument. CIP, which strongly stimulates metalloprotease activity,<sup>17 18</sup> exhibited no risk of TRs in our study, and LEX which inhibits metalloprotease activity<sup>44 45</sup> exhibited a large risk. So, we have to question whether metalloprotease activity has any relevance to TR risk, and consider other explanations for the observed associations.

The indication for an antibiotic is a presumed bacterial infection. The reported associations between antibiotics and TR could be a consequence of the indication (infection) rather than the antibiotic use to treat it. It could be a perfect example of the confounding by indication.<sup>46</sup> Such a bias could explain many reported associations between drugs and TR risk including associations with non-antibiotic drugs reported by Nyssönen *et al.*<sup>8</sup>

This indication (and infection) bias could generate an association between the antibiotic and TRs in different ways. First, the bacterial infection might directly increase the risk of TR via stimulation of general immune or cytokine responses, or even by direct bacterial invasion. A recent study found gram-positive bacteria in a major share of ruptured tendons but not in 'control' tendons removed surgically for grafting.<sup>47</sup> So, the possibility of direct invasion of tendons by circulating bacteria with subsequent weakening and rupture is plausible.

Second, the greater clinical attention likely focused on patients needing systemic antibiotics, especially those with more severe infections, could increase the chance of noticing and documenting a pre-existing TR. A reservoir of not-yet-diagnosed such cases is likely to exist, because patients do not necessarily correctly identify joint and extremity symptoms as TRs and seek immediate care for them. TRs of the shoulder capsule, for example, are notorious for developing symptoms slowly over 2–3 years<sup>48</sup> before being correctly diagnosed. Even Achilles TRs can be missed (in 30% of cases) at the first presentation.<sup>49</sup> Seeger *et al* reviewed the medical records of patients with an insurance claim reporting TRs following antibiotic use and found that nearly half of the TRs recorded in the claims were either something else (eg, Bursa inflammation miscoded as a TR) or had occurred pre antibiotic use but only seen in a claim post antibiotic use.<sup>11</sup>

Indication bias is a plausible explanations for associations reported in observational studies and it should be considered more often before assuming the associations are causal.

#### LIMITATION

This study faces all of the limitations of observational studies. Furthermore, it applies only to fee-for-service Medicare populations. In addition, we had no options to verify claims diagnoses via chart review. From a statistical point of view, our findings may have some limitations. First, we included 80 covariates in one analysis and concern about intercorrelation affecting the validity could exist. To evaluate the intercorrelation, we calculated an 80×80 correlation matrix of estimated regression which can deliver information about the strength of intercorrelation and indicate the existence of a collinear relationship between two predictors. All pairwise correlations (except diagonal elements) were below 0.5, and the largest was 0.33 indicating minimal bias due to intercorrelation. We also did not consider interactions among covariates in our main analysis because of the problem of overfitting. We ran four sensitivity analyses with interaction terms between the study medications and four covariates (rheumatoid arthritis/osteoarthritis, obesity, female sex, lung cancer). The inclusion of interactions did not change our conclusion of no TR risk for FQ as a class.

**Acknowledgements** Jason Lau was with National Institutes of Health (NIH) during this work and now he is with the UC Davis Health. This work was partially supported by the Intramural Research Program of the National Library of Medicine, National Institutes of Health. This research was made possible through the National Institutes of Health (NIH) Medical Research Scholars Program, a public-private partnership supported jointly by the NIH and generous contributions to the Foundation for the NIH from the Doris Duke Charitable Foundation, Genentech, the American Association for Dental Research, the Colgate-Palmolive Company, Elsevier, alumni of student research programs, and other individual supporters via contributions to the Foundation for the National Institutes of Health. For a complete list, please visit the Foundation website at: <http://fnih.org/what-we-do/current-education-and-training-programs/mrsp>

**Contributors** SB: study conception, design, analysis and interpretation; critical review of study content; manuscript drafting; approval of the final manuscript.

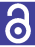

JL: study concept and interpretation; manuscript drafting; approval of the final manuscript. VH: study interpretation; manuscript drafting; approval of the final manuscript. CJM: study conception, design and interpretation; critical review of study content; manuscript drafting; approval of the final manuscript.

**Funding** This study is supported by the Intramural Research Program of the National Library of Medicine, National Institutes of Health.

**Competing interests** None declared.

**Patient consent for publication** Not required.

**Provenance and peer review** Not commissioned; externally peer reviewed.

**Data availability statement** All data relevant to the study are included in the article or uploaded as supplementary information. The authors confirm that the data supporting the findings of this study are available within the article (and/or) its supplementary materials.

**Supplemental material** This content has been supplied by the author(s). It has not been vetted by BMJ Publishing Group Limited (BMJ) and may not have been peer-reviewed. Any opinions or recommendations discussed are solely those of the author(s) and are not endorsed by BMJ. BMJ disclaims all liability and responsibility arising from any reliance placed on the content. Where the content includes any translated material, BMJ does not warrant the accuracy and reliability of the translations (including but not limited to local regulations, clinical guidelines, terminology, drug names and drug dosages), and is not responsible for any error and/or omissions arising from translation and adaptation or otherwise.

**Open access** This is an open access article distributed in accordance with the Creative Commons Attribution Non Commercial (CC BY-NC 4.0) license, which permits others to distribute, remix, adapt, build upon this work non-commercially, and license their derivative works on different terms, provided the original work is properly cited, appropriate credit is given, any changes made indicated, and the use is non-commercial. See: <http://creativecommons.org/licenses/by-nc/4.0/>.

#### ORCID iD

Seo Baik <http://orcid.org/0000-0002-2077-4316>

#### REFERENCES

- Hicks LA, Bartoces MG, Roberts RM, et al. US outpatient antibiotic prescribing variation according to geography, patient population, and provider specialty in 2011. *Clin Infect Dis* 2015;60:1308–16.
- Magill SS, Edwards JR, Beldavs ZG, et al. Prevalence of antimicrobial use in US acute care hospitals, May–September 2011. *JAMA* 2014;312:1438.
- Daneman N, Lu H, Redelmeier DA. Fluoroquinolones and collagen associated severe adverse events: a longitudinal cohort study. *BMJ Open* 2015;5:e010077.
- Morales DR, Slattery J, Pacurariu A, et al. Relative and absolute risk of tendon rupture with fluoroquinolone and concomitant Fluoroquinolone/Corticosteroid therapy: population-based nested case-control study. *Clin Drug Investig* 2019;39:205–13.
- van der Linden PD, Sturkenboom MCJM, Herings RMC, et al. Increased risk of Achilles tendon rupture with quinolone antibacterial use, especially in elderly patients taking oral corticosteroids. *Arch Intern Med* 2003;163:1801.
- Wise BL, Peloquin C, Choi H, et al. Impact of age, sex, obesity, and steroid use on Quinolone-associated tendon disorders. *Am J Med* 2012;125:1228.e23–28.
- Sode J, Obel N, Hallas J, et al. Use of fluoroquinolone and risk of Achilles tendon rupture: a population-based cohort study. *Eur J Clin Pharmacol* 2007;63:499–503.
- Nyyssönen T, Lantto I, Lütjhe P, et al. Drug treatments associated with Achilles tendon rupture. A case-control study involving 1118 Achilles tendon ruptures. *Scand J Med Sci Sports* 2018;28:2625–9.
- WILTON L V, PEARCE GL, MANN RD. A comparison of ciprofloxacin, norfloxacin, ofloxacin, azithromycin and cefixime examined by observational cohort studies. *Br J Clin Pharmacol* 1996;41:277–84.
- Jupiter DC, Fang X, Ashmore Z, et al. The relative risk of Achilles tendon injury in patients taking quinolones. *Pharmacotherapy* 2018;38:878–87.
- Seeger JD, West WA, Fife D, et al. Achilles tendon rupture and its association with fluoroquinolone antibiotics and other potential risk factors in a managed care population. *Pharmacoepidemiol Drug Saf* 2006;15:784–92.
- Hori K, Yamakawa K, Yoshida N, et al. Detection of fluoroquinolone-induced tendon disorders using a hospital database in Japan. *Pharmacoepidemiol Drug Saf* 2012;21:886–9.
- Tanne JH. FDA adds 'black box' warning label to fluoroquinolone antibiotics. *BMJ* 2008;337:a816.
- Food and Drug Administration. FDA drug safety communication: FDA advises restricting fluoroquinolone antibiotic use for certain uncomplicated infections; warns about disabling side effects that can occur together. Available: <https://www.fda.gov/drugs/drug-safety-and-availability/fda-drug-safety-communication-fda-advises-restricting-fluoroquinolone-antibiotic-use-certain> [Accessed 12 Jun 2019].
- Food and Drug Administration. FDA drug safety communication: FDA updates warnings for oral and injectable fluoroquinolone antibiotics due to disabling side effects. Available: <https://www.fda.gov/drugs/drug-safety-and-availability/fda-drug-safety-communication-fda-updates-warnings-oral-and-injectable-fluoroquinolone-antibiotics> [Accessed 12 Jun 2019].
- Del Buono A, Oliva F, Osti L, et al. Metalloproteases and tendinopathy. *Muscles Ligaments Tendons J* 2013;3:51–7.
- Tsai W-C, Hsu C-C, Chen CPC, et al. Ciprofloxacin up-regulates tendon cells to express matrix metalloproteinase-2 with degradation of type I collagen. *J Orthop Res* 2011;29:67–73.
- Corps AN, Harrall RL, Curry VA, et al. Ciprofloxacin enhances the stimulation of matrix metalloproteinase 3 expression by interleukin-1beta in human tendon-derived cells. A potential mechanism of fluoroquinolone-induced tendinopathy. *Arthritis Rheum* 2002;46:3034–40.
- ResDAC. Cms virtual research data center (VRDC). Available: <https://www.resdac.org/cms-virtual-research-data-center-vrdc> [Accessed 4 Oct 2019].
- Cubanski J, Swoope C, Boccuti C, et al. A primer on Medicare, 2015. Available: <http://files.kff.org/attachment/report-a-primer-on-medicare-key-facts-about-the-medicare-program-and-the-people-it-covers> [Accessed 7 Feb 2019].
- Johnson ES, Bartman BA, Briesacher BA, et al. The incident user design in comparative effectiveness research. *Pharmacoepidemiol Drug Saf* 2013;22:1–6.
- Fine JP, Gray RJ. A proportional hazards model for the Subdistribution of a competing risk. *J Am Stat Assoc* 1999;94:496–509.
- Berry SD, Ngo L, Samelson EJ, et al. Competing risk of death: an important consideration in studies of older adults. *J Am Geriatr Soc* 2010;58:783–7.
- Putter H, Fiocco M, Geskus RB. Tutorial in biostatistics: competing risks and multi-state models. *Stat Med* 2007;26:2389–430.
- The Medicare Payment Advisory Commission. MedPAC Data book: Beneficiaries dually eligible for Medicare and Medicaid - January 2016, 2016. Available: <http://www.medpac.gov/docs/default-source/publications/january-2016-medpac-and-macpac-data-book-beneficiaries-dually-eligible-for-medicare-and-medicaid.pdf?sfvrsn=0> [Accessed 23 Jan 2017].
- The Chronic Condition Warehouse. Chronic conditions data Warehouse: CCW chronic condition algorithms. Available: <https://www.ccwdata.org/web/guest/condition-categories> [Accessed 23 Jan 2017].
- Stricker BHC, Stijnen T. Analysis of individual drug use as a time-varying determinant of exposure in prospective population-based cohort studies. *Eur J Epidemiol* 2010;25:245–51.
- Shariff SZ, Cuerden MS, Jain AK, et al. The secret of immortal time bias in epidemiologic studies. *J Am Soc Nephrol* 2008;19:841–3.
- Shintani AK, Girard TD, Eden SK, et al. Immortal time bias in critical care research: application of time-varying COX regression for observational cohort studies. *Crit Care Med* 2009;37:2939–45.
- Rosenbaum PR, Rubin DB. The central role of the propensity score in observational studies for causal effects. *Biometrika* 1983;70:41–55.
- Austin PC. An introduction to propensity score methods for reducing the effects of confounding in observational studies. *Multivariate Behav Res* 2011;46:399–424.
- Austin PC, Stuart EA. The performance of inverse probability of treatment weighting and full matching on the propensity score in the presence of model misspecification when estimating the effect of treatment on survival outcomes. *Stat Methods Med Res* 2017;26:1654–70.
- Zakaria MHB, Davis WA, Davis TME. Incidence and predictors of hospitalization for tendon rupture in type 2 diabetes: the Fremantle diabetes study. *Diabet Med* 2014;31:425–30.
- Basic-Jukic N, Juric I, Racki S, et al. Spontaneous tendon ruptures in patients with end-stage renal disease. *Kidney Blood Press Res* 2009;32:32–6.
- Jafari M, Ansari-Pour N. Why, when and how to adjust your P values? *Cell J* 2019;20:604–7.
- Khaliq Y, Zhanel GG. Fluoroquinolone-associated tendinopathy: a critical review of the literature. *Clin Infect Dis* 2003;36:1404–10.

## Open access



- 37 White DW, Wenke JC, Mosely DS, *et al.* Incidence of major tendon ruptures and anterior cruciate ligament tears in US army soldiers. *Am J Sports Med* 2007;35:1308–14.
- 38 Owens B, Mountcastle S, White D. Racial differences in tendon rupture incidence. *Int J Sports Med* 2007;28:617–20.
- 39 Corps AN, Harrall RL, Curry VA, *et al.* Contrasting effects of fluoroquinolone antibiotics on the expression of the collagenases, matrix metalloproteinases (MMP)-1 and -13, in human tendon-derived cells. *Rheumatology* 2005;44:1514–7.
- 40 Sharma C, Velpandian T, Baskar Singh S, *et al.* Effect of fluoroquinolones on the expression of matrix metalloproteinase in debrided cornea of rats. *Toxicol Mech Methods* 2011;21:6–12.
- 41 Sbardella D, Tundo GR, Fasciglione GF, *et al.* Role of metalloproteinases in tendon pathophysiology. *Mini Rev Med Chem* 2014;14:978–87.
- 42 Arabyat RM, Raisch DW, McKoy JM, *et al.* Fluoroquinolone-associated tendon-rupture: a summary of reports in the food and drug administration's adverse event reporting system. *Expert Opin Drug Saf* 2015;14:1653–60.
- 43 Sakaeda T, Tamon A, Kadoyama K, *et al.* Data mining of the public version of the FDA adverse event reporting system. *Int J Med Sci* 2013;10:796–803.
- 44 Santavirta S, Takagi M, Konttinen YT, *et al.* Inhibitory effect of cephalothin on matrix metalloproteinase activity around loose hip prostheses. *Antimicrob Agents Chemother* 1996;40:244–6.
- 45 Kannan R, Ruff M, Kochins JG, *et al.* Purification of active matrix metalloproteinase catalytic domains and its use for screening of specific stromelysin-3 inhibitors. *Protein Expr Purif* 1999;16:76–83.
- 46 de Koning JS, Klazinga NS, Koudstaal PJ, *et al.* The role of 'confounding by indication' in assessing the effect of quality of care on disease outcomes in general practice: results of a case-control study. *BMC Health Serv Res* 2005;5:10.
- 47 Rolf CG, Fu S-C, Hopkins C, *et al.* Presence of bacteria in spontaneous Achilles tendon ruptures. *Am J Sports Med* 2017;45:2061–7.
- 48 Tashjian RZ. Epidemiology, natural history, and indications for treatment of rotator cuff tears. *Clin Sports Med* 2012;31:589–604.
- 49 Christensen I. Rupture of the Achilles tendon; analysis of 57 cases. *Acta Chir Scand* 1953;106:50–60.

AUTHOR PROOF
